# Supplementary material for: One-pot biomimetic total synthesis of yuehchukene via the organocatalytic alkylation–cyclization process of a sterically encumbered α-alkyl enal
Source: Royal Society of Chemistry journal article supplement (doi:10.1039/c4ra10222c), 2014-11-04
Supplement: c4ra10222c1.pdf [file c4ra10222c1.pdf]

# Organocatalytic Enantioselective Friedel-Crafts Alkylation of the Sterically Encumbered $\alpha$ -Alkyl Enal: One-pot Biomimetic Total Synthesis of Yuehchukene.

Nitin S. Dange,<sup>†</sup> Bor-Cherng Hong,<sup>\*,†</sup> and Gene-Hsiang Lee<sup>‡</sup>

<sup>†</sup>Department of Chemistry and Biochemistry, National Chung Cheng University, Chia-Yi, 621, Taiwan, R.O.C., and <sup>‡</sup>Instrumentation Center, National Taiwan University, Taipei, 106, Taiwan, R.O.C

*chebch@ccu.edu.tw*

## SUPPORTING INFORMATION:

|                                                                                   |             |
|-----------------------------------------------------------------------------------|-------------|
| Contents: (1) Experimental procedures and characterization data for compound..... | Page 2–13   |
| (2) Spectra data for compounds <b>1a</b> – <b>1c</b> .....                        | Page 14–61  |
| (3) <i>Ee</i> analysis by HPLC with chiral column.....                            | Page 62–109 |

**General Procedure.** All solvents were reagent grade. L-proline (99+%) was purchased from Bachem. Other chemicals were purchased from Aldrich or Acros Chemical Co. Reactions were normally carried out under argon atmosphere in glassware. Silica gel 60 (Merck Geduran Si 60, particle size 0.063 – 0.200 nm) was employed for flash chromatography. Melting points are uncorrected. <sup>1</sup>H NMR spectra were obtained in CDCl<sub>3</sub> unless otherwise noted at 400 MHz (Bruker DPX-400) or 500 MHz (Varian-Unity INOVA-500). <sup>13</sup>C NMR spectra were obtained at 100 MHz or 125 MHz. *E.e.* values were measured by HITACHI L-2130 HPLC with HITACHI Diode Array detector L-2455 on a chiral column (chiralpak IC, 0.46 cm ID x 25 cm, particle size 5  $\mu$ ; or chiralpak IA 0.46 cm ID x 25 cm, particle size 5  $\mu$ ) by elution with IPA-hexane. The flow rate of the indicated elution solvent is maintained at 1.0 mL/min, and the retention time of a compound is recorded accordingly. Focused microwave irradiation was carried out at atmospheric pressure with a CEM Discover microwave reactor (5 mL reactors). The melting point was recorded on a melting point apparatus (MPA100 – Automated melting point system, Stanford Research Systems, Inc.) and is uncorrected. The optical rotation values were recorded with a Jasco-P-2000 digital polarimeter.

## Preparation of 4a

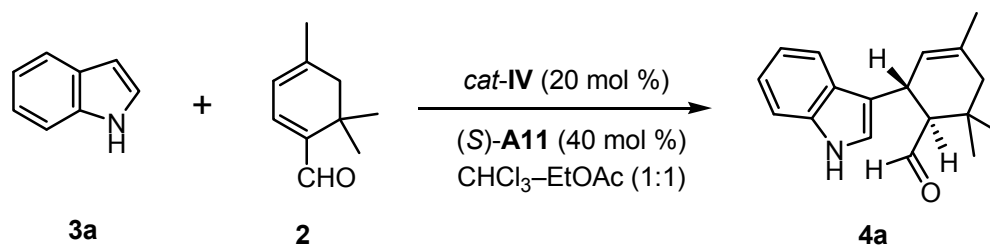

To a solution of aldehyde **2** (102 mg, 0.68 mmol, 2 equiv), catalyst-**IV** (22.1 mg, 0.068 mmol, 0.2 equiv) and additive-(*S*)-**A11** (47.3 mg, 0.14 mmol, 0.4 equiv) in  $\text{CHCl}_3$ -EtOAc (1:1, 1 mL) was added indole **3a** (40 mg, 0.34 mmol, 1 equiv) at  $\sim 25^\circ\text{C}$ . The resulting solution was stirred at ambient temperature for 15 days. To the reaction mixture was added  $\text{Et}_3\text{N}$  (34 mg, 0.34 mmol, 1 equiv) and the corresponding reaction mixture was stirred for 30 min. The reaction solution was concentrated in *vacuo* to give the residue. The crude product was purified by flash column chromatography with 8 % EtOAc-hexane ( $R_f = 0.54$  for *trans*-**4a** after developing three times in 15 % EtOAc-hexane and  $R_f = 0.51$  for *cis*-**4a** after developing three times in 15 % EtOAc-hexane) to afford product **4a** as mixture of diastereomers (23 mg, 25 % yield) as a yellow oil. Further purification of **4a** provided the pure *trans*-**4a** for spectra analysis. Selected spectroscopic data for *trans*-**4a**:  $[\alpha]_{\text{D}}^{26} -95.5$  ( $c$  1,  $\text{CHCl}_3$ ) for 88% *ee* of *trans*-**4a**; IR (neat): 3417, 2963, 2825, 1712, 1457, 1260, 1096, 1011, 803, 742  $\text{cm}^{-1}$ ;  $^1\text{H}$  NMR (500 MHz,  $\text{CDCl}_3$ ):  $\delta$  9.70 (d,  $J = 4.5$  Hz, 1 H), 7.96 (bs, 1 H), 7.58 (d,  $J = 8.0$  Hz, 1 H), 7.31 (d,  $J = 8.0$  Hz, 1 H), 7.18 – 7.14 (m, 1 H), 7.09 – 7.05 (m, 1 H), 6.93 (d,  $J = 2.5$  Hz, 1 H), 5.50 (s, 1 H), 4.08 – 4.05 (m, 1 H), 2.63 (dd,  $J = 11.0, 4.0$  Hz, 1 H), 2.18 (d,  $J = 17.0$  Hz, 1 H), 1.71 (s, 3 H), 1.69 (d,  $J = 17$  Hz, 1 H), 1.12 (s, 3 H), 1.11 (s, 3 H),  $^{13}\text{C}$  NMR (125 MHz,  $\text{CDCl}_3$ ):  $\delta$  206.5 (CH), 136.7 (C), 131.7 (C), 126.4 (C), 123.0 (CH), 122.0 (CH), 121.9 (CH), 119.4 (CH), 119.2 (CH), 117.5 (C), 111.3 (CH), 60.8 (CH), 46.5 ( $\text{CH}_2$ ), 33.8 (C), 32.2 (CH), 29.3 ( $\text{CH}_3$ ), 23.4 ( $\text{CH}_3$ ), 21.5 ( $\text{CH}_3$ ); MS ( $m/z$ , relative intensity): 268 ( $\text{M}^+ + 1$ , 20) 267 ( $\text{M}^+$ , 100), 238 (80), 222 (39), 182 (76), 168 (77), 130 (26), 117 (44), exact mass calculated for  $\text{C}_{18}\text{H}_{21}\text{NO}$  ( $\text{M}^+$ ): 267.1623; found : 267.1624.

## Preparation of 4b

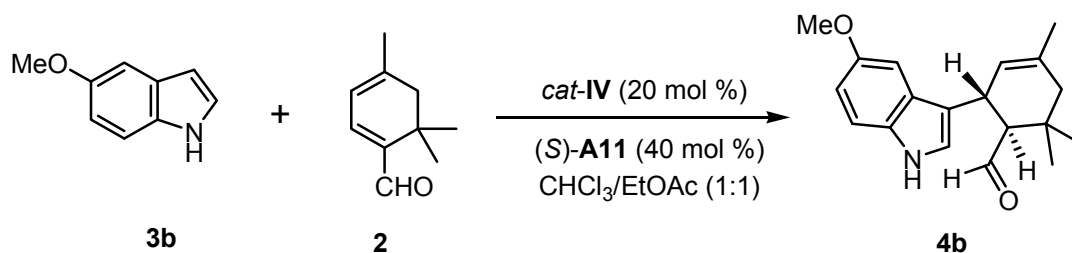

To a solution of aldehyde **2** (81.6 mg, 0.54 mmol, 2 equiv), catalyst-**IV** (17.7 mg, 0.05 mmol, 0.2 equiv) and additive-(*S*)-**A11** (37.8 mg, 0.11 mmol, 0.4 equiv) in  $\text{CHCl}_3$ -EtOAc (1:1, 0.77 mL) was added indole **3b** (40 mg, 0.27 mmol, 1 equiv) at  $\sim 25^\circ\text{C}$ . The resulting solution was stirred at ambient temperature for 15 days. To the reaction mixture was added  $\text{Et}_3\text{N}$  (27 mg, 0.27 mmol, 1 equiv) and the corresponding reaction mixture was stirred for 30 min. The reaction solution was concentrated in *vacuo* to give the residue. The crude product was purified by flash column chromatography with 10 % EtOAc-hexane ( $R_f = 0.49$  for *trans*-**4b** after developing three times in 15 % EtOAc-hexane and  $R_f = 0.46$  for *cis*-**4b** after developing three times in 15 % EtOAc-hexane) to afford product **4b** as mixture of diastereomers (24 mg, 30 % yield) as yellow oil; Selected spectroscopic data for *trans*-**4b**:  $[\alpha]_D^{26} -59.2$  ( $c$  1,  $\text{CHCl}_3$ ) for 58% *ee* of *trans*-**4b**; IR (neat): 3414, 2964, 2828, 1716, 1486, 1457, 1439, 1260, 1217, 1027, 800,  $756\text{ cm}^{-1}$ ;  $^1\text{H NMR}$  (500 MHz,  $\text{CDCl}_3$ ):  $\delta$  9.70 (d,  $J = 4.5$  Hz, 1 H), 7.84 (bs, 1 H), 7.21 (d,  $J = 8.5$  Hz, 1 H), 7.03 (d,  $J = 2.0$  Hz, 1 H), 6.91 (d,  $J = 2.5$  Hz, 1 H), 6.82 (dd,  $J = 8.5, 2.5$  Hz, 1 H), 5.49 (s, 1 H), 4.04 – 4.00 (m, 1 H), 3.83 (s, 3 H), 2.60 (dd,  $J = 11, 4$  Hz, 1 H), 2.16 (d,  $J = 17$  Hz, 1 H), 1.78 – 1.68 (m, 1 H), 1.71 (s, 3 H), 1.11 (s, 3 H), 1.10 (s, 3 H),  $^{13}\text{C NMR}$  (125 MHz,  $\text{CDCl}_3$ ):  $\delta$  206.5 (CH), 153.6 (C), 131.82 (C), 131.76 (C), 126.8 (C), 122.9 (CH), 122.7 (CH), 117.2 (C), 111.9 (CH), 111.8 (CH), 101.6 (CH), 60.6 (CH), 55.9 (CH<sub>3</sub>), 46.5 (CH<sub>2</sub>), 33.8 (C), 32.1 (CH), 29.3 (CH<sub>3</sub>), 23.4 (CH<sub>3</sub>), 21.5 (CH<sub>3</sub>); MS ( $m/z$ , relative intensity): 298 ( $\text{M}^+ + 1$ , 21), 297 ( $\text{M}^+$ , 100), 268 (76), 252 (26), 212 (74), 198 (52), 147 (40), 101 (39), exact mass calculated for  $\text{C}_{19}\text{H}_{23}\text{NO}_2$  ( $\text{M}^+$ ): 297.1729; found : 297.1728.

Preparation of **4c**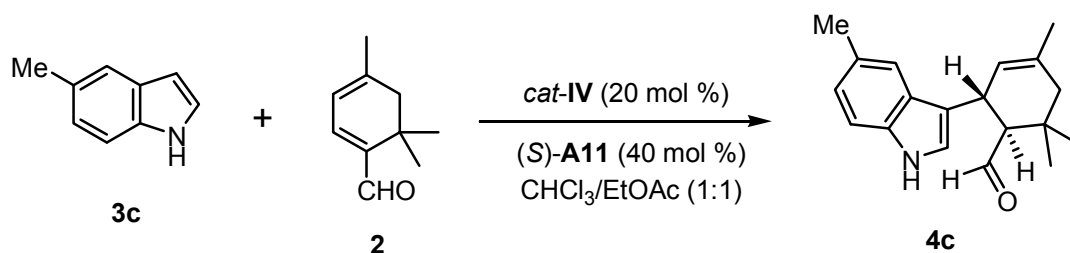

To a solution of aldehyde **2** (91.5 mg, 0.61 mmol, 2 equiv), catalyst-**IV** (19.8 mg, 0.06 mmol, 0.2 equiv) and additive-(*S*)-**A11** (42.4 mg, 0.12 mmol, 0.4 equiv) in  $\text{CHCl}_3$ -EtOAc (1:1, 0.87 mL) was added indole **3c** (40 mg, 0.30 mmol, 1 equiv) at  $\sim 25^\circ\text{C}$ . The resulting solution was stirred at ambient temperature for 15 days. To the reaction mixture was added  $\text{Et}_3\text{N}$  (31 mg, 0.305 mmol, 1 equiv) and the corresponding reaction mixture was stirred for 30 min. The reaction solution was concentrated in *vacuo* to give the residue. The crude product was purified by flash column chromatography with 8 % EtOAc-hexane ( $R_f = 0.35$  for *trans*-**4c** after developing two times in 15 % EtOAc-hexane and  $R_f = 0.32$  for *cis*-**4c** after developing two times in 15 % EtOAc-hexane) to afford product **4c** as mixture of diastereomers (23 mg, 27 % yield) as yellow oil; Selected spectroscopic data for *trans*-**4c**:  $[\alpha]_{\text{D}}^{26} -72.1$  ( $c$  0.8,  $\text{CHCl}_3$ ) for 72% *ee* of *trans*-**4c**; IR (neat): 3375, 3012, 2963, 2825, 1719, 1543, 1484, 1466, 1369, 1317, 1205, 1157, 1021, 990, 858, 752  $\text{cm}^{-1}$ ;  $^1\text{H}$  NMR (500 MHz,  $\text{CDCl}_3$ ):  $\delta$  9.68 (d,  $J = 4.5$  Hz, 1 H), 7.84 (bs, 1 H), 7.34 (s, 1 H), 7.20 (d,  $J = 8.0$  Hz, 1 H), 6.98 (dd,  $J = 8.5, 1.5$  Hz, 1 H), 6.89 (d,  $J = 2.5$  Hz, 1 H), 5.49 (s, 1 H), 4.06 – 4.02 (m, 1 H), 2.60 (dd,  $J = 11.0, 4.0$  Hz, 1 H), 2.43 (s, 3 H) 2.17 – 2.14 (m, 1 H), 1.78 – 1.67 (m, 1 H), 1.70 (s, 3 H), 1.11 (s, 6 H),  $^{13}\text{C}$  NMR (125 MHz,  $\text{CDCl}_3$ ):  $\delta$  206.6 (CH), 135.0 (C), 131.6 (C), 128.4 (C), 126.6 (C), 123.7 (CH), 123.0 (CH), 122.0 (CH), 118.9 (CH), 117.0 (C), 110.9 (CH), 60.6 (CH), 46.5 ( $\text{CH}_2$ ), 33.8 (C), 32.1 (CH), 29.3 ( $\text{CH}_3$ ), 23.4 ( $\text{CH}_3$ ), 21.62 ( $\text{CH}_3$ ), 21.57 ( $\text{CH}_3$ ); MS ( $m/z$ , relative intensity): 282 ( $\text{M}^+ + 1$ , 22), 281 ( $\text{M}^+$ , 100), 252 (92), 236 (33), 196 (75), 182 (58), 131 (35), 59 (55), exact mass calculated for  $\text{C}_{19}\text{H}_{23}\text{NO}$  ( $\text{M}^+$ ): 281.1780; found : 281.1782.

## Preparation of 4d

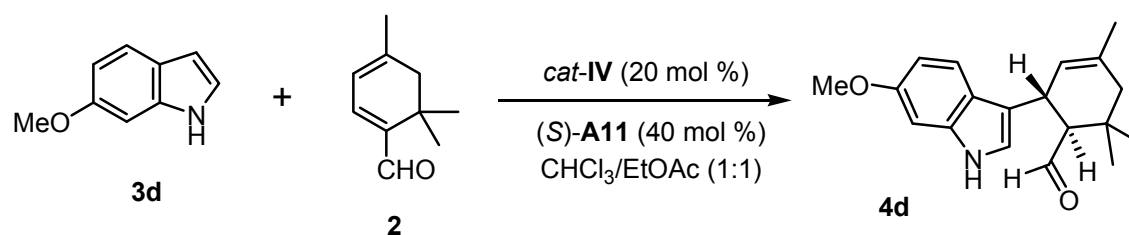

To a solution of aldehyde **2** (81.6 mg, 0.54 mmol, 2 equiv), catalyst-**IV** (17.7 mg, 0.05 mmol, 0.2 equiv) and additive-(*S*)-**A11** (37.8 mg, 0.11 mmol, 0.4 equiv) in  $\text{CHCl}_3$ -EtOAc (1:1, 0.77 mL) was added indole **3d** (40 mg, 0.27 mmol, 1 equiv) at  $\sim 25^\circ\text{C}$ . The resulting solution was stirred at ambient temperature for 15 days. To the reaction mixture was added  $\text{Et}_3\text{N}$  (27 mg, 0.27 mmol, 1 equiv) and the corresponding reaction mixture was stirred for 30 min. The reaction solution was concentrated in *vacuo* to give the residue. The crude product was purified by flash column chromatography with 10 % EtOAc-hexane ( $R_f = 0.47$  for *trans*-**4d** after developing two times in 15 % EtOAc-hexane and  $R_f = 0.44$  for *cis*-**4d** after developing two times in 15 % EtOAc-hexane) to afford product **4d** as mixture of diastereomers (19 mg, 23 % yield) as yellow oil; Selected spectroscopic data for *trans*-**4d**:  $[\alpha]_D^{26} -83.3$  ( $c$  1,  $\text{CHCl}_3$ ) for 78% *ee* of *trans*-**4d**; IR (neat): 3369, 3015, 2963, 2825, 1718, 1484, 1466, 1317, 1205, 1156, 1021, 857, 752, 666  $\text{cm}^{-1}$ ;  $^1\text{H}$  NMR (500 MHz,  $\text{CDCl}_3$ ):  $\delta$  9.69 (d,  $J = 4.0$  Hz, 1 H), 7.80 (bs, 1 H), 7.43 (d,  $J = 9.0$  Hz, 1 H), 6.81 (dd,  $J = 6.5, 2.0$  Hz, 2 H), 6.74 (dd,  $J = 8.5, 2.0$  Hz, 1 H), 5.48 (s, 1 H), 4.02 – 3.99 (m, 1 H), 3.81 (s, 3 H), 2.58 (dd,  $J = 11.0, 4.0$  Hz, 1 H), 2.17 – 2.14 (m, 1 H), 1.77 – 1.66 (m, 1 H), 1.70 (s, 3 H), 1.10 (s, 3 H), 1.09 (s, 3 H);  $^{13}\text{C}$  NMR (125 MHz,  $\text{CDCl}_3$ ):  $\delta$  206.5 (CH), 156.5 (C), 137.4 (C), 131.7 (C), 123.0 (CH), 120.7 (C), 120.5 (CH), 120.0 (CH), 117.5 (C), 109.3 (CH), 94.8 (CH), 60.7 (CH), 55.7 ( $\text{CH}_3$ ), 46.5 ( $\text{CH}_2$ ), 33.8 (C), 32.3 (CH), 29.3 ( $\text{CH}_3$ ), 23.5 ( $\text{CH}_3$ ), 21.5 ( $\text{CH}_3$ ), MS ( $m/z$ , relative intensity): 298 ( $\text{M}^+ + 1$ , 21), 297 ( $\text{M}^+$ , 100), 268 (100), 212 (61), 198 (39), 147 (38), 59 (44), exact mass calculated for  $\text{C}_{19}\text{H}_{23}\text{NO}_2$  ( $\text{M}^+$ ): 297.1729; found : 297.1731.

### Preparation of 4e

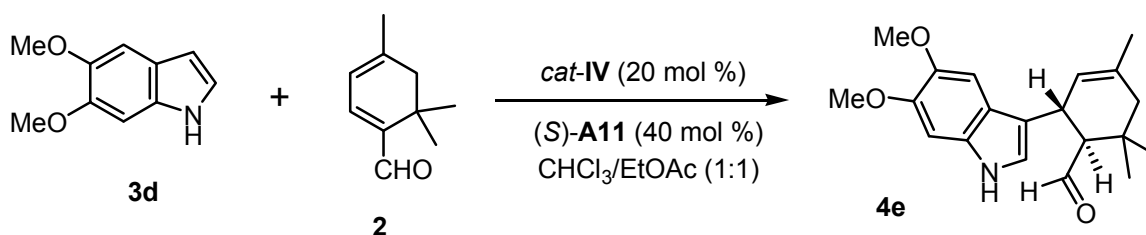

To a solution of aldehyde **2** (68 mg, 0.45 mmol, 2 equiv), catalyst-**IV** (14.3 mg, 0.04 mmol, 0.2 equiv) and additive-(*S*)-**A11** (30.6 mg, 0.09 mmol, 0.4 equiv) in  $\text{CHCl}_3$ -EtOAc (1:1, 0.60 mL) was added indole **3e** (40 mg, 0.23 mmol, 1 equiv) at  $\sim 25^\circ\text{C}$ . The resulting solution was stirred at ambient temperature for 15 days. To the reaction mixture was added  $\text{Et}_3\text{N}$  (23 mg, 0.23 mmol, 1 equiv) and the corresponding reaction mixture was stirred for 30 min. The reaction solution was concentrated in *vacuo* to give the residue. The crude product was purified by flash column chromatography with 15 % EtOAc-hexane ( $R_f = 0.30$  for *trans*-**4e** after developing two times in 30 % EtOAc-hexane and  $R_f = 0.27$  for *cis*-**4e** after developing two times in 30 % EtOAc-hexane) to afford product **4e** as mixture of diastereomers (18 mg, 24 % yield) as yellow oil. For purified *trans*-**4e**, darkkhaki solid, m.p. decomposed at  $185^\circ\text{C}$ . Selected spectroscopic data for *trans*-**4e**:  $[\alpha]_{\text{D}}^{26} -78.2$  ( $c$  1.2,  $\text{CHCl}_3$ ) for 79% *ee* of *trans*-**4e**; IR (neat): 3372, 2960, 1718, 1484, 1466, 1317, 1205, 1157, 1022, 755  $\text{cm}^{-1}$ ;  $^1\text{H}$  NMR (500 MHz,  $\text{CDCl}_3$ ):  $\delta$  9.70 (d,  $J = 4$  Hz, 1 H), 7.80 (bs, 1 H), 7.01 (s, 1 H), 6.82 (s, 1 H), 6.79 (d,  $J = 2.5$  Hz, 1 H), 5.50 (s, 1 H), 4.02 – 3.99 (m, 1 H), 3.90 (s, 3 H), 3.87 (s, 3 H), 2.56 (dd,  $J = 11.0, 4.5$  Hz, 1 H), 2.15 – 2.02 (m, 1 H), 1.79 – 1.70 (m, 1 H), 1.71 (s, 3 H), 1.11 (s, 3 H), 1.10 (s, 3 H);  $^{13}\text{C}$  NMR (125 MHz,  $\text{CDCl}_3$ ):  $\delta$  206.5 (CH), 147.2 (C), 144.6 (C), 131.7 (C), 130.9 (C), 123.0 (CH), 120.2 (CH), 119.1 (C), 117.4 (C), 101.2 (CH), 94.7 (CH), 60.8 (CH), 56.4 ( $\text{CH}_3$ ), 56.2 ( $\text{CH}_3$ ), 46.5 ( $\text{CH}_2$ ), 33.8 (C), 32.1 (CH), 29.3 ( $\text{CH}_3$ ), 23.4 ( $\text{CH}_3$ ), 21.5 ( $\text{CH}_3$ ); MS ( $m/z$ , relative intensity): 328 ( $\text{M}^+ + 1$ , 22), 327 ( $\text{M}^+$ , 100), 298 (99), 284 (19), 282 (16), 242 (41), 228 (28), 177 (36), 71 (32), exact mass calculated for  $\text{C}_{20}\text{H}_{25}\text{NO}_3$  ( $\text{M}^+$ ): 327.1834; found : 327.1834.

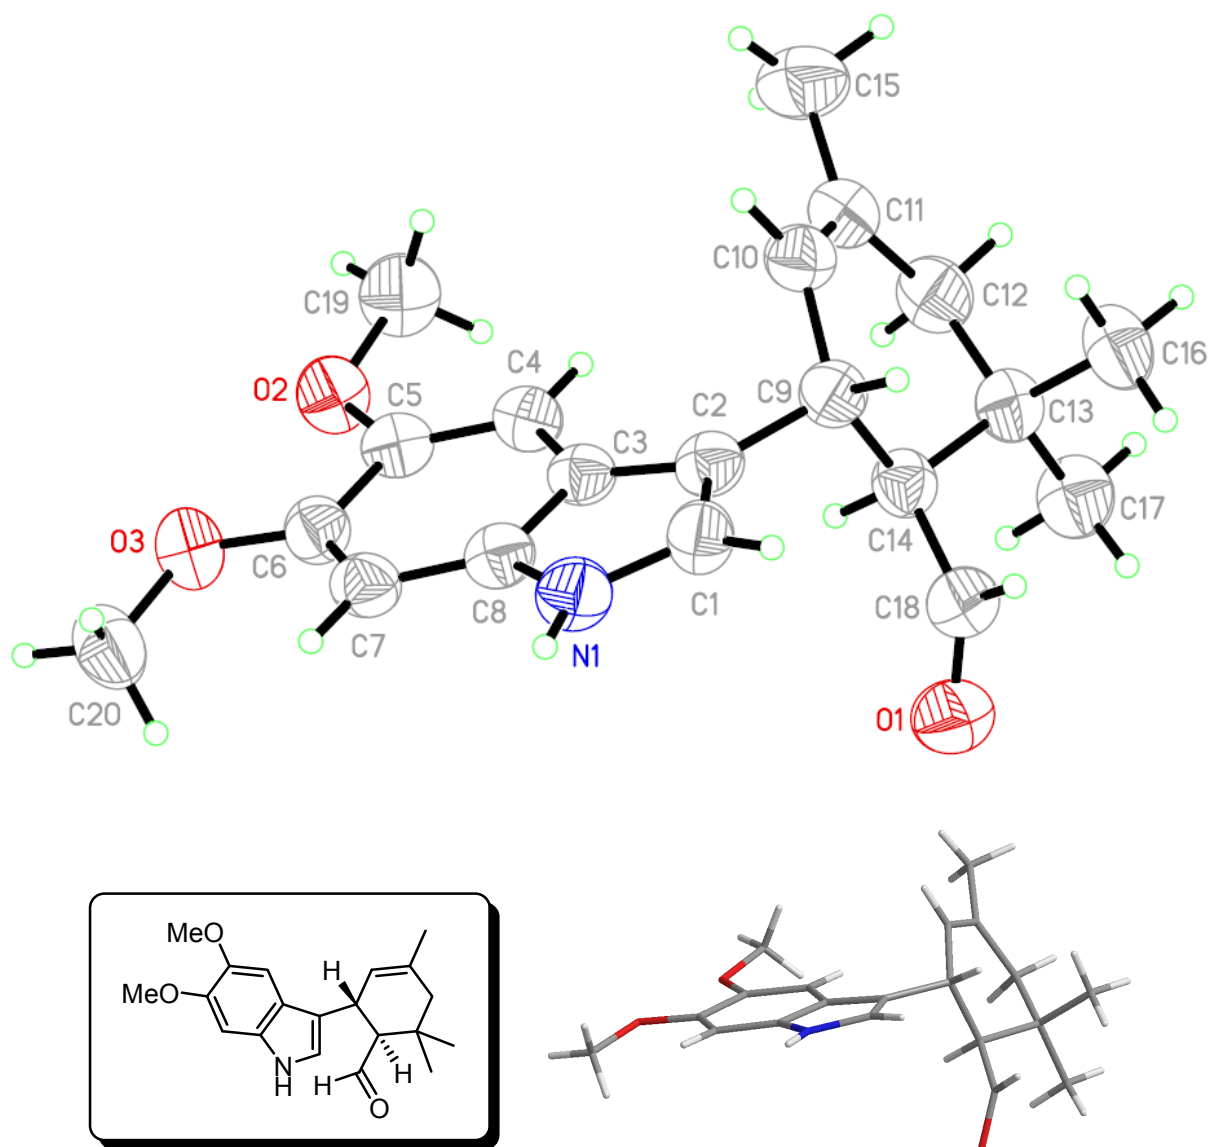

**Figure S1.** ORTEP and Stereo plots for X-ray crystal structures of (-)-*trans*-4e.

CCDC-1011541 contains the supplementary crystallographic data for (-)-*trans*-4e. These data can be obtained free of charge from the Cambridge Crystallographic Data Centre via [www.ccdc.cam.ac.uk/data\\_request/cif](http://www.ccdc.cam.ac.uk/data_request/cif).

## Preparation of **1a**

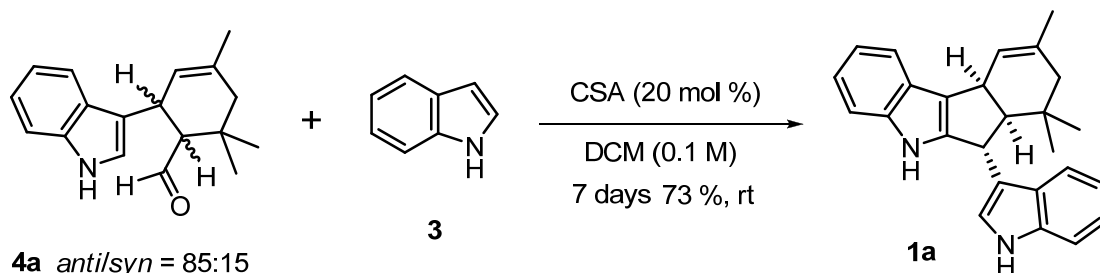

To a solution of aldehyde **4a** (15 mg, 0.06 mmol) and indole **3a** (7.9 mg, 0.07 mmol, 1.2 equiv) in CH<sub>2</sub>Cl<sub>2</sub> (0.1M, 0.56 mL) was added (*S*)-CSA (2.6 mg, 0.01 mmol, 0.2 equiv) at room temperature. The resulting solution was stirred at ambient temperature for 7 days until the completion of reaction, as monitored by TLC. To the reaction mixture was added Et<sub>3</sub>N (6 mg, 0.06 mmol) and the corresponding reaction mixture was stirred for 30 min. The reaction solution was concentrated in *vacuo* to give a crude residue. The crude product was purified by flash column chromatography with 8 % EtOAc-hexane (*R<sub>f</sub>* = 0.40 for **1a** after developing three times in 15 % EtOAc-hexane) to afford product **1** (15 mg, 73 % yield) as amorphous white powder; m.p. 125-127 °C (decomp.) Lit. 128 °C;<sup>1</sup> 127;<sup>2</sup> Selected spectroscopic data for **1a**:<sup>3</sup> IR (neat): 3410, 2963, 2906, 1454, 1415, 1260, 1114, 1008, 865, 797, 701cm<sup>-1</sup>; <sup>1</sup>H NMR (500 MHz, CDCl<sub>3</sub>): δ 8.00 (bs, 1 H), 7.55 (d, *J* = 7.5 Hz, 1 H), 7.48 (bs, 1 H), 7.42 (d, *J* = 8.0 Hz, 1 H), 7.36 (d, *J* = 8.0 Hz, 1 H), 7.18 (dd, *J* = 7.5, 7.5 Hz, 1 H), 7.15 – 6.99 (m, 5 H), 5.68 (s, 1 H), 4.56 (d, *J* = 8.5 Hz, 1 H), 4.0 (d, *J* = 6.0 Hz, 1 H), 3.15 (dd, *J* = 8.5, 7.0 Hz, 1 H), 2.25 (d, *J* = 17.0 Hz, 1 H), 1.64 (s, 3 H), 1.61 (d, *J* = 17.0 Hz, 1 H), 1.07 (s, 3 H), 0.85 (s, 3 H), <sup>13</sup>C NMR (125 MHz, CDCl<sub>3</sub>): δ 145.1 (C), 140.2 (C), 136.5 (C), 130.2 (C), 126.8 (C), 124.2 (C), 122.9 (CH), 122.3 (CH), 122.0 (CH), 120.52 (CH), 120.48 (CH), 119.50 (CH), 119.48 (CH), 119.4 (C), 118.4 (C), 118.2 (CH), 111.7 (CH), 111.2 (CH), 60.7 (CH), 41.0 (CH<sub>2</sub>), 38.3 (CH), 37.6 (CH), 33.5 (C), 29.1 (CH<sub>3</sub>), 28.9 (CH<sub>3</sub>), 24.1 (CH<sub>3</sub>); MS (*m/z*, relative intensity): 366 (M<sup>+</sup>, 17), 351 (8), 284 (12), 267 (82), 245 (25), 238 (58), 222 (35), 182 (91), 168 (94), 117 (62), 97 (47), 85 (82), 71 (100), 57 (100); exact mass calculated for C<sub>26</sub>H<sub>26</sub>N<sub>2</sub> (M<sup>+</sup>): 366.2096; found : 366.2093.

<sup>1</sup> Henry, K. J.; Grieco, P. A. *J. Chem. Soc., Chem. Commun.* **1993**, 510.

<sup>2</sup> (a) Kong, Y.-C.; Cheng, K.-F.; Cambie, R. C.; Waterman, P. G. *J. Chem. Soc., Chem. Commun.*, **1985**, 47-48. (b) Chen, Y.-K.; Chung, H.-F.; Lin, S.-F.; Sheu, J.-H.; Sung, P.-J. *J. Chem. Soc. Perkin Trans. 1*, **1998**, 1959 – 1965

<sup>3</sup> In a separate reaction, starting from 84% *ee* of *trans*-**4a** with (*S*)-**A12** in CH<sub>2</sub>Cl<sub>2</sub> at ~35 °C for 15 days provided 73% yield of **1a** with 21% *ee*. For the yuehchukene (**1a**) obtained (21% *ee*): [α]<sub>D</sub><sup>26</sup> -16.6 (c 1.4, CHCl<sub>3</sub>).



**<sup>1</sup>H NMR Data for Yuehchukene (1a)**

| Lit. <sup>1</sup> |                     | Obs. <sup>a</sup> |                     |
|-------------------|---------------------|-------------------|---------------------|
|                   | mult, <i>J</i> (Hz) |                   | mult, <i>J</i> (Hz) |
| 8.02              | br s, 1H            | 8.00              | br s, 1H            |
| 7.56              | d (7.8), 1H         | 7.55              | d (7.5), 1H         |
| 7.49              | br s, 1H            | 7.47              | br s, 1H            |
| 7.43              | d (8.0), 1H         | 7.42              | d (8.0), 1H         |
| 7.37              | d (8.3), 1H         | 7.36              | d (8.0), 1H         |
| 7.18              | t (7.3), 1H         | 7.18              | dd (7.5, 7.5), 1H   |
| 6.99-7.20         | m, 5H               | 6.99-7.15         | m, 5H               |
| 5.68              | s, 1H               | 5.68              | s, 1H               |
| 4.57              | d (7.8), 1H         | 4.55              | d (8.5), 1H         |
| 4.0               | br s, 1H            | 4.0               | d (6), 1H           |
| 3.16              | t (8.1), 1H         | 3.15              | dd (8.5, 7), 1H     |
| 2.27              | d (17), 1H          | 2.25              | d (17), 1H          |
| 1.65              | s, 3H               | 1.64              | s, 3H               |
| 1.60              | d (17), 1H          | 1.61              | d (17), 1H          |
| 1.08              | s, 3H               | 1.07              | s, 3H               |
| 0.86              | s, 3H               | 0.85              | s, 3H               |

<sup>a</sup>Spectrum recorded at 500 MHz (Varian Unity INOVA 500) in CDCl<sub>3</sub>

<sup>13</sup>C NMR Data for Yuehchukene (1a)

| Lit. <sup>4</sup> | Lit. <sup>5</sup> | Lit. <sup>6</sup> | Lit. <sup>7</sup> | Lit. <sup>8</sup> | Lit. <sup>9</sup> | Obs. <sup>a</sup> |                 |
|-------------------|-------------------|-------------------|-------------------|-------------------|-------------------|-------------------|-----------------|
|                   | $\delta$          | $\delta$          | $\delta$          | $\delta$          | $\delta$          | $\delta$          | Type            |
| 145.09            | 145.0             | 145.2             | 145.3             | 145.2             | 145.15            | 145.15            | C               |
| 140.22            | 140.1             | 140.2             | 140.3             | 140.2             | 140.22            | 140.19            | C               |
| 136.47            | 136.4             | 136.4             | 136.5             | 136.5             | 136.48            | 136.47            | C               |
| 130.13            | 130.1             | 130.2             | 130.3             | 130.2             | 130.20            | 130.22            | C               |
| 126.76            | 126.7             | 126.8             | 126.9             | 126.8             | 126.78            | 126.75            | C               |
| 124.23            | 124.1             | 124.2             | 124.3             | 124.2             | 124.23            | 124.21            | C               |
| 122.90            | 122.9             | 122.9             | 123.1             | 122.3             | 122.95            | 122.94            | CH              |
| 122.16            | 122.2             | 122.3             | 122.5             | 122.3             | 122.27            | 122.29            | CH              |
| 122.08            | 121.9             | 122.0             | 122.1             | 122.1             | 122.06            | 122.05            | CH              |
| 120.46            | 120.5             | 120.5             | 120.6             | 120.6             | 120.52            | 120.52            | CH              |
|                   | 120.4             | 120.4             | 120.5             | 120.5             | 120.52            | 120.48            | CH              |
| 119.44            | 119.4             | 119.5             | 119.6             | 119.5             | 119.50            | 119.50            | CH              |
|                   |                   |                   |                   | 119.5             | 119.50            | 119.48            | CH              |
| 119.24            | 119.3             | 119.3             | 119.4             | 119.3             | 119.34            | 119.36            | C               |
| 118.50            | 118.4             | 118.4             | 118.5             | 118.5             | 118.50            | 118.46            | C               |
| 118.19            | 118.2             | 118.2             | 118.4             | 118.4             | 118.25            | 118.25            | CH              |
| 111.60            | 111.6             | 111.7             | 111.8             | 111.7             | 111.68            | 111.69            | CH              |
| 111.14            | 111.2             | 111.2             | 111.4             | 111.2             | 111.21            | 111.22            | CH              |
| 60.80             | 60.8              | 60.8              | 60.9              | 60.8              | 60.80             | 60.74             | CH              |
| 41.03             | 41.0              | 41.0              | 41.1              | 41.0              | 41.02             | 40.98             | CH <sub>2</sub> |
|                   | 38.3              | 38.3              | 38.4              | 38.3              | 38.32             | 38.30             | CH              |
| 37.54             | 37.7              | 37.5              | 37.7              | 37.6              | 37.61             | 37.61             | CH              |
| 33.41             | 33.6              | 33.5              | 33.6              | 33.5              | 33.50             | 33.50             | C               |
|                   | 29.2              | 29.1              | 29.2              | 29.0              | 29.09             | 29.14             | CH <sub>3</sub> |
| 28.83             | 29.0              | 28.9              | 29.0              | 28.9              | 28.90             | 28.90             | CH <sub>3</sub> |
| 23.91             | 24.1              | 24.1              | 24.2              | 24.1              | 24.05             | 24.07             | CH <sub>3</sub> |

<sup>a</sup>Spectrum recorded at 125 MHz (Varian Unity INOVA 500) in CDCl<sub>3</sub>

<sup>4</sup> Kong, Y. C. Novel indole derivative, processes for its preparation and its use as fertility control agent Eur. Pat. Appl. EP0130067 A3 1985.

<sup>5</sup> Naka, H.; Akagi, Y.; Yamada, K.; Imahori, T.; Kasahara, T.; Kondo, Y. *Eur. J. Org. Chem.* **2007**, 4635 – 4637.

<sup>6</sup> Imaizumi, Katsuaki; Ishikura, Minoru; Katagiri, Nobuya *Heterocycles*, **2000**, *53*, 2201 – 2220.

<sup>7</sup> Abe, T.; Komatsu, H.; Ikeda, T.; Hatae, N.; Toyota, E.; Ishikura, M. *Heterocycles*, **2012**, *86*, 505 – 513.

<sup>8</sup> Chen, Y.-K.; Chung, H.-F.; Lin, S.-F.; Sheu, J.-H.; Sung, P.-J. *J. Chem. Soc. Perkin Trans. 1*, **1998**, 1959 – 1965.

<sup>9</sup> Sheu, J.-H.; Chen, Y.-K.; Hong, Y.-L. *V. J. Org. Chem.* **1993**, *58*, 5784 – 5787.

### One-pot synthesis of (±)-yuehchukene (**1a**) from aldehyde **2** and indole (**3a**)

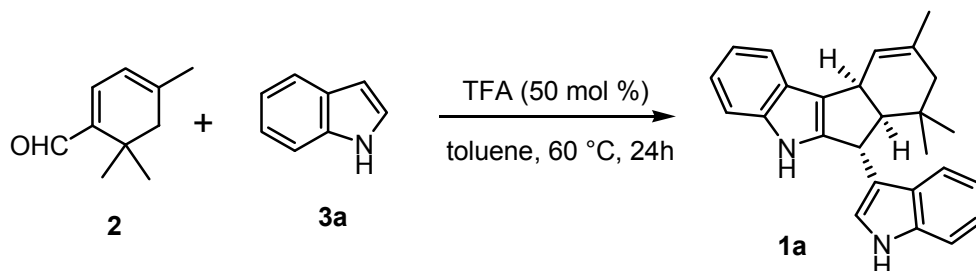

To a solution of aldehyde **2** (100 mg, 0.67 mmol) and indole **3a** (156 mg, 1.33 mmol, 2 equiv) in toluene (0.2 M, 3.3 mL) was added TFA (38 mg, 0.33 mmol, 0.5 equiv) at room temperature. The resulting solution was heated to 60 °C and stirred at the same temperature for 24 h until the completion of reaction, as monitored by TLC. The solution was cooled to 0 °C, followed by the addition of Et<sub>3</sub>N (67 mg, 0.66 mmol), and the corresponding reaction mixture was stirred for 30 min. The reaction mixture was diluted with EtOAc (50 mL) and washed with H<sub>2</sub>O (10 mL). The organic reaction solution was concentrated in *vacuo* to give a crude residue. The crude product was purified by flash column chromatography with 8 % EtOAc-hexane ( $R_f$  = 0.40 for **1a** after developing three times in 15 % EtOAc-hexane) to afford product **1** (40 mg, 16 % yield) as white solid.

### One-pot synthesis of (±)-**1b** from aldehyde **2** and indole **3b**

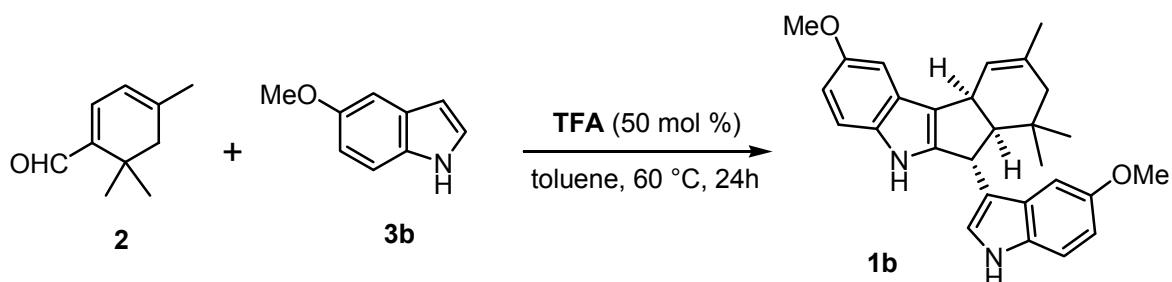

To a solution of aldehyde **2** (100 mg, 0.67 mmol) and indole **3b** (196 mg, 1.33 mmol, 2 equiv) in toluene (0.2 M, 3.3 mL) was added TFA (38 mg, 0.33 mmol, 0.5 equiv) at room temperature. The resulting solution was heated to 60 °C and stirred at the same temperature for 24 h until the completion of reaction, as monitored by TLC. The solution was cooled to 0 °C, followed by the addition of Et<sub>3</sub>N (67 mg, 0.66 mmol), and the corresponding reaction mixture was stirred for 30 min. The reaction mixture was diluted with EtOAc (50 mL) and washed with H<sub>2</sub>O (10 mL). The organic solution was concentrated in *vacuo* to give a crude residue. The crude product was purified by flash column chromatography with 10 %

EtOAc-hexane ( $R_f = 0.50$  for **1b** after developing two times in 20 % EtOAc-hexane) to afford product **1b** (30 mg, 13 % yield) as yellow solid. m.p. 160 °C (decomp). Selected spectroscopic data for **1b**: IR (neat): 3403, 2947, 1586, 1484, 1211, 1034, 799, 760 $\text{cm}^{-1}$ ;  $^1\text{H}$  NMR (500 MHz,  $\text{C}_6\text{D}_6$ ):  $\delta$  7.26 (d,  $J = 2.5$  Hz, 1 H), 7.07 (dd,  $J = 9.0, 2.5$  Hz, 1 H), 6.95 – 7.01 (m, 3 H), 6.77 (d,  $J = 9.0$  Hz, 1 H), 6.67 (bs, 1 H), 6.48 (d,  $J = 2.0$  Hz, 2 H), 5.87 (s, 1 H), 4.50 (d,  $J = 8.0$  Hz, 1 H), 4.05 – 4.10 (m, 1 H), 3.59 (s, 3 H), 3.39 (s, 3 H), 3.17 (dd,  $J = 8.0, 8.0$  Hz, 1 H), 2.29 (d,  $J = 17.0$  Hz, 1 H), 1.66 (s, 3 H), 1.59 (d,  $J = 17.0$  Hz, 1 H), 1.15 (s, 3 H), 0.95 (s, 3 H);  $^{13}\text{C}$  NMR (125 MHz,  $\text{C}_6\text{D}_6$ ):  $\delta$  155.3 (2 C), 146.7 (C), 136.2 (C), 132.2 (C), 130.2 (2 C), 125.5 (C), 124.3 (CH), 123.2 (CH), 120.8 (C), 119.0 (C), 113.3 (CH), 113.0 (CH), 112.6 (CH), 111.0 (CH), 101.6 (CH), 101.4 (CH), 62.2 (CH), 55.8 ( $\text{CH}_3$ ), 55.7 ( $\text{CH}_3$ ), 41.8 ( $\text{CH}_2$ ), 39.1 (CH), 38.2 (CH), 34.0 (C), 29.7 ( $\text{CH}_3$ ), 29.6 ( $\text{CH}_3$ ), 24.5 (CH); MS ( $m/z$ , relative intensity): 427 ( $\text{M}^+ + 1$ , 31), 426 ( $\text{M}^+$ , 100), 411 (43), 359 (56), 264 (35), 185 (45), 160 (38), 57 (54); exact mass calculated for  $\text{C}_{28}\text{H}_{30}\text{N}_2\text{O}_2$  ( $\text{M}^+$ ): 426.2307; found: 426.2310.

### One-pot synthesis of ( $\pm$ )-**1c** from aldehyde **2** and indole **3c**

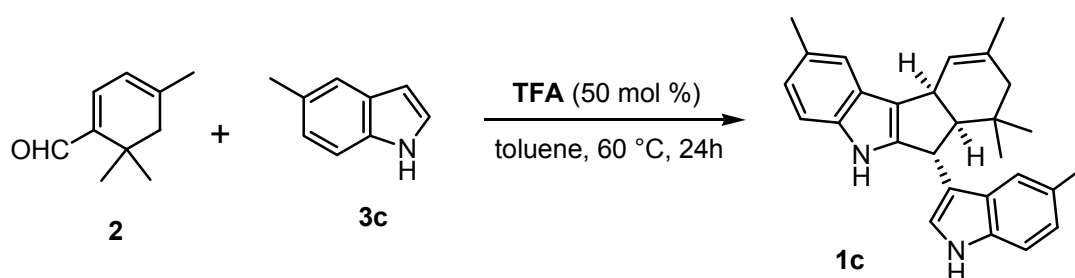

To a solution of aldehyde **2** (100 mg, 0.67 mmol) and indole **3c** (175 mg, 1.33 mmol, 2 equiv) in toluene (0.2 M, 3.3 mL) was added TFA (38 mg, 0.33 mmol, 0.5 equiv) at room temperature. The resulting solution was heated to 60 °C and stirred at the same temperature for 24 h until the completion of reaction, as monitored by TLC. The solution was cooled to 0 °C, followed by the addition of  $\text{Et}_3\text{N}$  (67 mg, 0.66 mmol), and the corresponding reaction mixture was stirred for 30 min. The reaction mixture was diluted with EtOAc (50 mL) and washed with  $\text{H}_2\text{O}$  (10 mL). The organic solution was concentrated in *vacuo* to give a crude residue. The crude product was purified by flash column chromatography with 8 % EtOAc-hexane ( $R_f = 0.60$  for **1c** after developing two times in 15 % EtOAc-hexane) to afford product **1c** (40 mg, 15 % yield) as yellow oil. Selected spectroscopic data for **1c**: IR (neat): 3404, 2917, 1716, 1620, 1454, 1297, 1096, 798  $\text{cm}^{-1}$ ;  $^1\text{H}$  NMR (500 MHz,  $\text{C}_6\text{D}_6$ ):  $\delta$  7.54 (s, 1 H), 7.41 (s, 1 H), 6.98 – 7.16 (m, 3 H), 6.81 (d,  $J = 8.5$  Hz, 1 H), 6.68 (bs, 1 H), 6.51 (bs, 1 H),

6.45 (d,  $J = 2.5$  Hz, 1 H), 5.88 (s, 1 H), 4.52 (d,  $J = 8.5$  Hz, 1 H), 4.05 – 4.11 (m, 1 H), 3.20 (dd,  $J = 8.0, 8.0$  Hz, 1 H), 2.48 (s, 3 H), 2.31 (s, 3 H), 2.26 – 2.28 (m, 1 H), 1.65 (s, 3 H), 1.56 (d,  $J = 16.5$  Hz, 1 H), 1.14 (s, 3 H), 1.01 (s, 3 H);  $^{13}\text{C}$  NMR (125 MHz,  $\text{C}_6\text{D}_6$ ):  $\delta$  146.1 (C), 139.6 (C), 135.5 (C), 130.1 (C), 129.2 (C), 128.9 (C), 128.7 (C), 125.6 (C), 124.5 (CH), 124.4 (CH), 122.64 (CH), 122.63 (CH), 120.3 (C), 119.4 (CH), 119.1 (CH), 118.9 (C), 112.1 (CH), 111.6 (CH), 62.3 (CH), 41.8 ( $\text{CH}_2$ ), 39.1 (CH), 38.1 (CH), 34.0 (C), 29.8 ( $\text{CH}_3$ ), 29.5 ( $\text{CH}_3$ ), 24.5 ( $\text{CH}_3$ ), 22.2 ( $\text{CH}_3$ ), 22.1 ( $\text{CH}_3$ ); MS ( $m/z$ , relative intensity): 395 ( $\text{M}^+ + 1$ , 12), 394 ( $\text{M}^+$ , 34), 379 (17), 248 (15), 221 (18), 207 (13), 198 (13), 149 (34), 85 (42), 71 (62), 58 (100); exact mass calculated for  $\text{C}_{28}\text{H}_{30}\text{N}_2$  ( $\text{M}^+$ ): 394.2409; found : 394.2407.

Fig S14. <sup>1</sup>H NMR (CDCl<sub>3</sub>, 500 MHz) of compound 4a.

NSD-09-68-F1

exp58 s2pul

|                     |                |            |          |
|---------------------|----------------|------------|----------|
| SAMPLE              |                | DEC. & VT  |          |
| date                | Aug 1 2013     | dfrq       | 125.694  |
| solvent             | cdcl3          | dn         | C13      |
| file                | /export/home/~ | dpwr       | 30       |
| vnmr1/vnmr          | sys/data~      | dof        | 0        |
| /NSD/NSD-09-68/F1/~ |                | dm         | nnn      |
|                     |                | dmm        | c        |
| ACQUISITION         |                | PROCESSING |          |
| sfrq                | 499.833        | dseq       | 200      |
| tn                  | H1             | dres       | 1.0      |
| at                  | 3.000          | homo       | n        |
| np                  | 48000          | wtfile     |          |
| sw                  | 8000.0         | proc       | ft       |
| fb                  | not used       | fn         | not used |
| bs                  | 4              | math       | f        |
| tpwr                | 61             | werr       | react    |
| pw                  | 4.8            | wexp       | procplot |
| d1                  | 1.000          | wbs        |          |
| tof                 | 499.7          | wnt        | wft      |
| nt                  | 4              |            |          |
| ct                  | 4              |            |          |
| alock               | y              |            |          |
| gain                | not used       |            |          |
| FLAGS               |                |            |          |
| il                  | n              |            |          |
| in                  | n              |            |          |
| dp                  | y              |            |          |
| hs                  | nn             |            |          |
| DISPLAY             |                |            |          |
| sp                  | -250.1         |            |          |
| wp                  | 5748.0         |            |          |
| vs                  | 100            |            |          |
| sc                  | 0              |            |          |
| wc                  | 210            |            |          |
| hzmm                | 27.37          |            |          |
| is                  | 33.57          |            |          |
| rfl                 | 4636.0         |            |          |
| rfp                 | 3618.8         |            |          |
| th                  | 2              |            |          |
| ins                 | 100.000        |            |          |
| nm                  | cdc ph         |            |          |

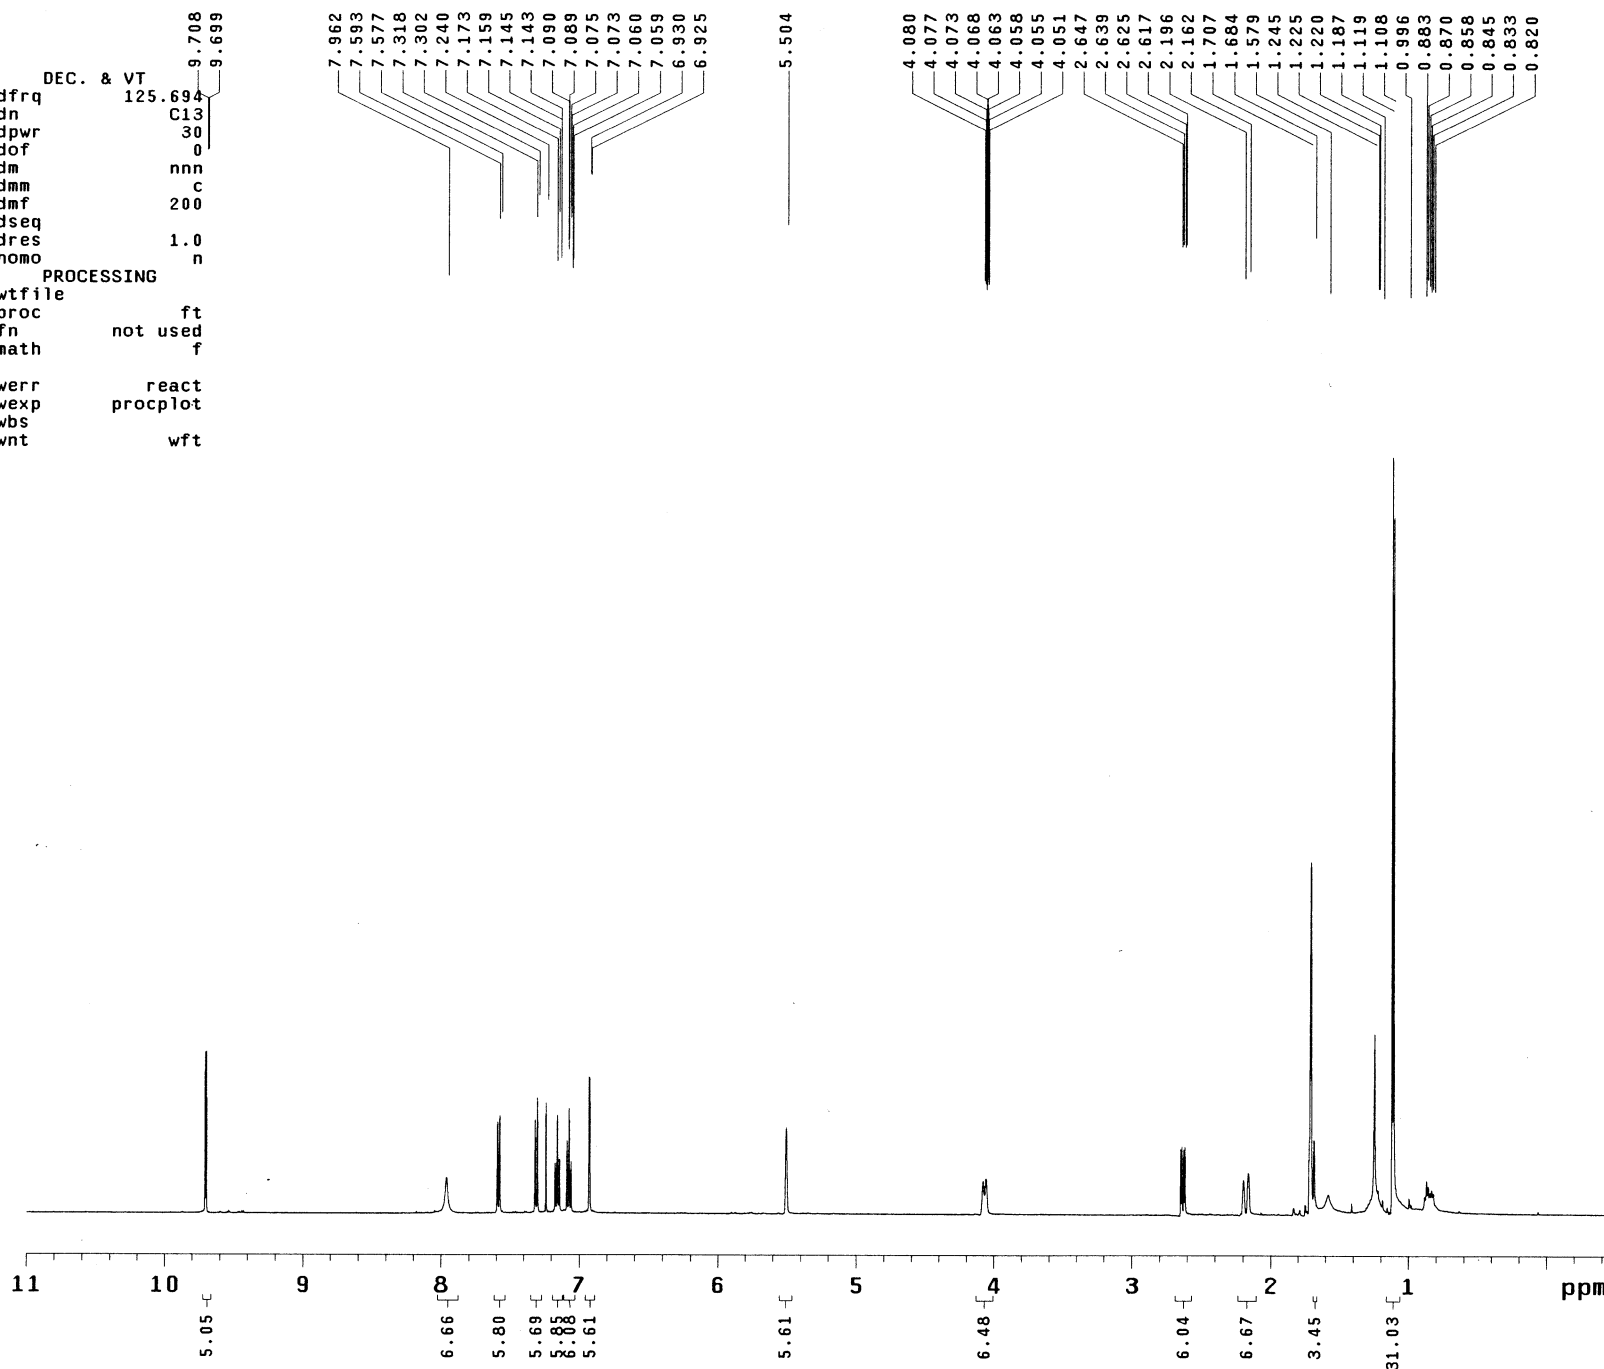

```

NSD-09-68-F1
exp4 s2pu1
SAMPLE
date Aug 1 2013 dfrq DEC. & VT 499.833
solvent cdc13 dn H1
file exp dpwr 44
ACQUISITION dof 0
sfrq 125.697 dm yyy
tn C13 dmm w
at 1.000 dmf 11765
np 62894 dseq
sw 31446.5 dres 1.0
fb not used homo n
bs 16 PROCESSING
ss 2 lb 1.00
tpwr 59 wtfile
pw 4.0 proc ft
d1 1.000 fn not used
tof 2512.2 math f
nt 1024
ct 1024 werr react
alock y wexp procp
gain not used wbs testsn
wnt
FLAGS
il n
in n
dp y
hs nn
DISPLAY
sp -1257.0
wp 28906.3
vs 150
sc 0
wc 210
hzmm 137.65
is 500.00
rfl 10980.6
rfp 9677.5
th 9
ins 100.000
nm cdc ph

```

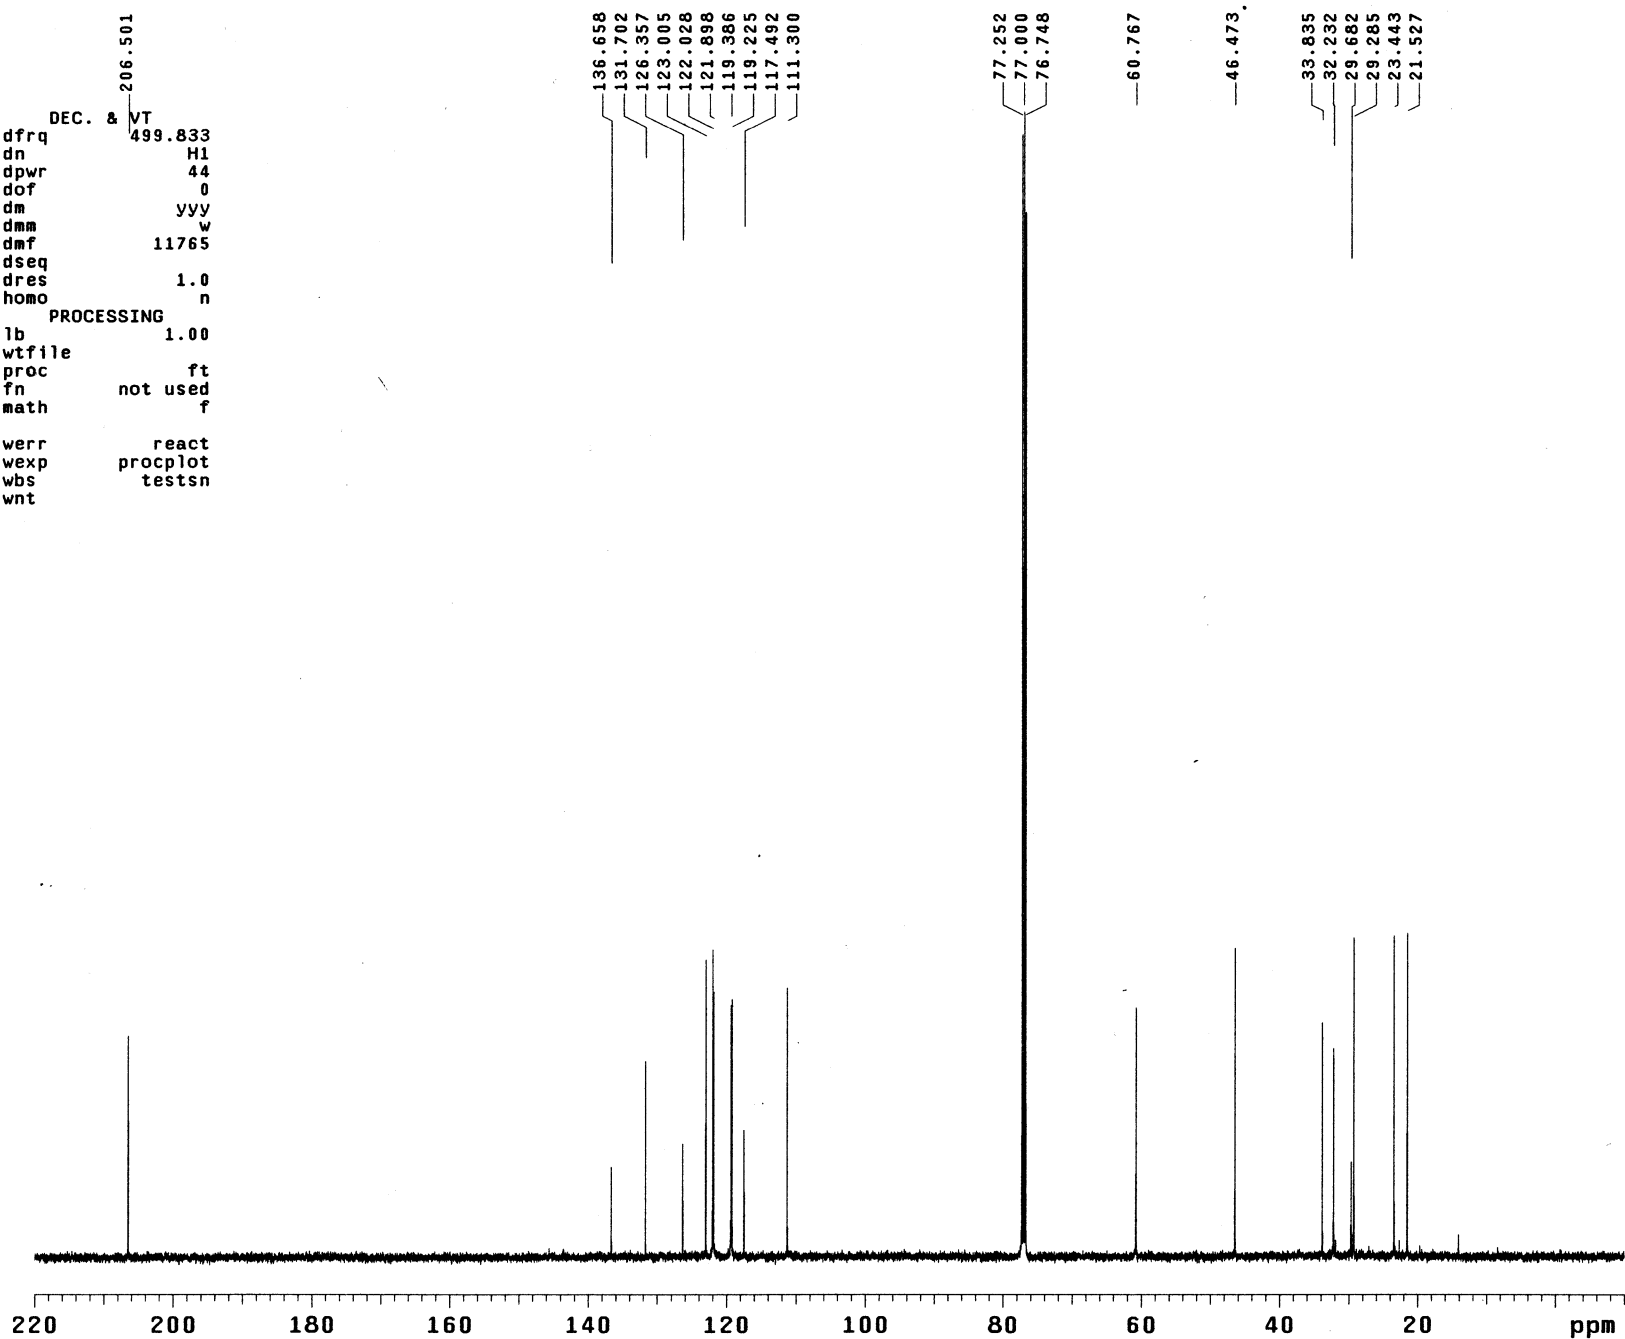Fig S15.  $^{13}\text{C}$  NMR ( $\text{CDCl}_3$ , 125 MHz) of compound 4a.

Fig S16. DEPT of compound 4a.

NSD-09-68-F1

exp5 DEPT

|             |            |            |          |          |      |
|-------------|------------|------------|----------|----------|------|
| date        | Aug 1 2013 | j1xh       | 140.0    | array    | mult |
| solvent     | cdcl3      | mult       | arrayed  | arraydim | 3    |
| sample      | undefined  | SPECIAL    |          |          |      |
| ACQUISITION |            | temp       | not used | 1        | mult |
| sw          | 31446.5    | gain       | 20       | 1        | 0.5  |
| at          | 1.000      | spin       | 0        | 2        | 1    |
| np          | 62894      | PROCESSING |          | 3        | 1.5  |
| bs          | 16         | lb         | 1.00     |          |      |
| ss          | -4         | fn         | not used |          |      |
| d1          | 1.000      | SPECTRUM   |          |          |      |
| nt          | 512        | wp         | 27650.1  |          |      |
| ct          | 512        | sp         | -1257.0  |          |      |
| TRANSMITTER |            | rp         | -29.8    |          |      |
| tn          | C13        | lp         | 125.7    |          |      |
| tof         | 2512.2     | ai         | cdc ph   |          |      |
| tpwr        | 59         | REFERENCE  |          |          |      |
| pw          | 10.600     | rfl        | 1302.1   |          |      |
| DECOUPLER   |            | rfp        | 0        |          |      |
| dn          | H1         | PLOT       |          |          |      |
| dof         | 0          | wc         | 210      |          |      |
| dpwr        | 44         | sc         | 0        |          |      |
| dm          | nny        | vs         | 300      |          |      |
| dmm         | 11765      | ccw        | 131.67   |          |      |
| dmf         | 59         | th         | 68       |          |      |
| pp1v1       | 15.300     |            |          |          |      |

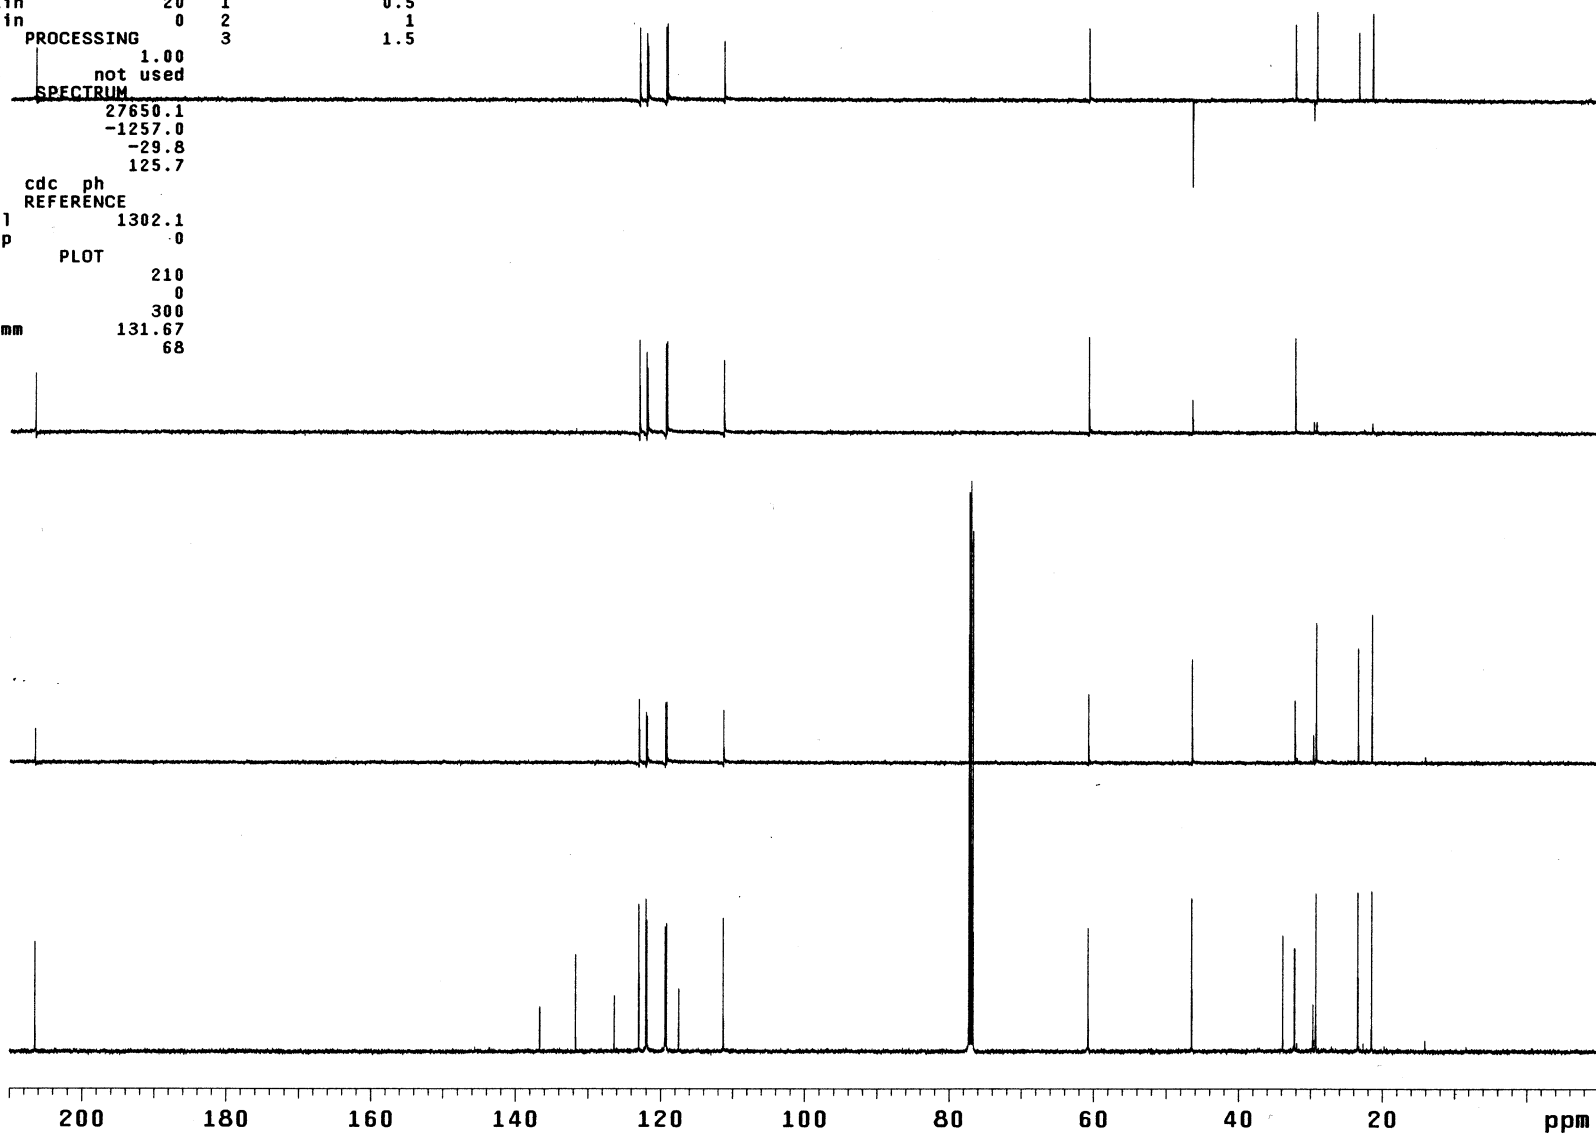



Fig S17. HSQC of compound 4a.

NSD-09-68-F1

exp8 gHSQC

| SAMPLE         |            | FLAGS         | ACQUISITION | ARRAYS   |
|----------------|------------|---------------|-------------|----------|
| date           | Aug 1 2013 | hs            | n           | array    |
| solvent        | cdc13      | sspul         | y           | arraydim |
| sample         | undefined  | PFGflg        | y           | phase    |
| ACQUISITION    |            | hsglv1        | 1006        | phase    |
| sw             | 5497.5     | SPECIAL       | 1           | 1        |
| at             | 0.186      | temp          | not used    | 2        |
| np             | 2048       | gain          | 60          |          |
| fb             | not used   | spin          | 0           |          |
| ss             | 32         | GRADIENTS     |             |          |
| d1             | 1.000      | gzlv11        | 1006        |          |
| nt             | 8          | gt1           | 0.002000    |          |
| 2D ACQUISITION |            | gzlv13        | 506         |          |
| sw1            | 21367.5    | gt3           | 0.001000    |          |
| n1             | 128        | gstab         | 0.000500    |          |
| phase          | arrayed    | F2 PROCESSING |             |          |
| TRANSMITTER    |            | gf            | 0.086       |          |
| tn             | H1         | gfs           | not used    |          |
| sfrq           | 499.833    | fn            | 2048        |          |
| tof            | 249.8      | F1 PROCESSING |             |          |
| tpwr           | 61         | gf1           | 0.006       |          |
| pw             | 12.000     | gfs1          | not used    |          |
| DECOUPLER      |            | proc1         | 1p          |          |
| dn             | C13        | fn1           | 2048        |          |
| dof            | -2515.1    | DISPLAY       |             |          |
| dm             | nny        | sp            | 268.5       |          |
| dmm            | ccp        | wp            | 4235.9      |          |
| dmf            | 32258      | sp1           | 1233.1      |          |
| dpwr           | 41         | wp1           | 15086.6     |          |
| pwxlvl         | 57         | rfl           | 1331.6      |          |
| pw             | 13.600     | rflp          | 1315.6      |          |
| HSQC           |            | rfl1          | 8929.1      |          |
| j1xh           | 140.0      | rflp1         | 7637.3      |          |
| nullflg        | y          | PLOT          |             |          |
| mult           | 2          | wc            | 150.0       |          |
|                |            | sc            | 6.2         |          |
|                |            | wc2           | 116.2       |          |
|                |            | sc2           | 0           |          |
|                |            | vs            | 100         |          |
|                |            | th            | 4           |          |
|                |            | ai            | cdc         | ph       |

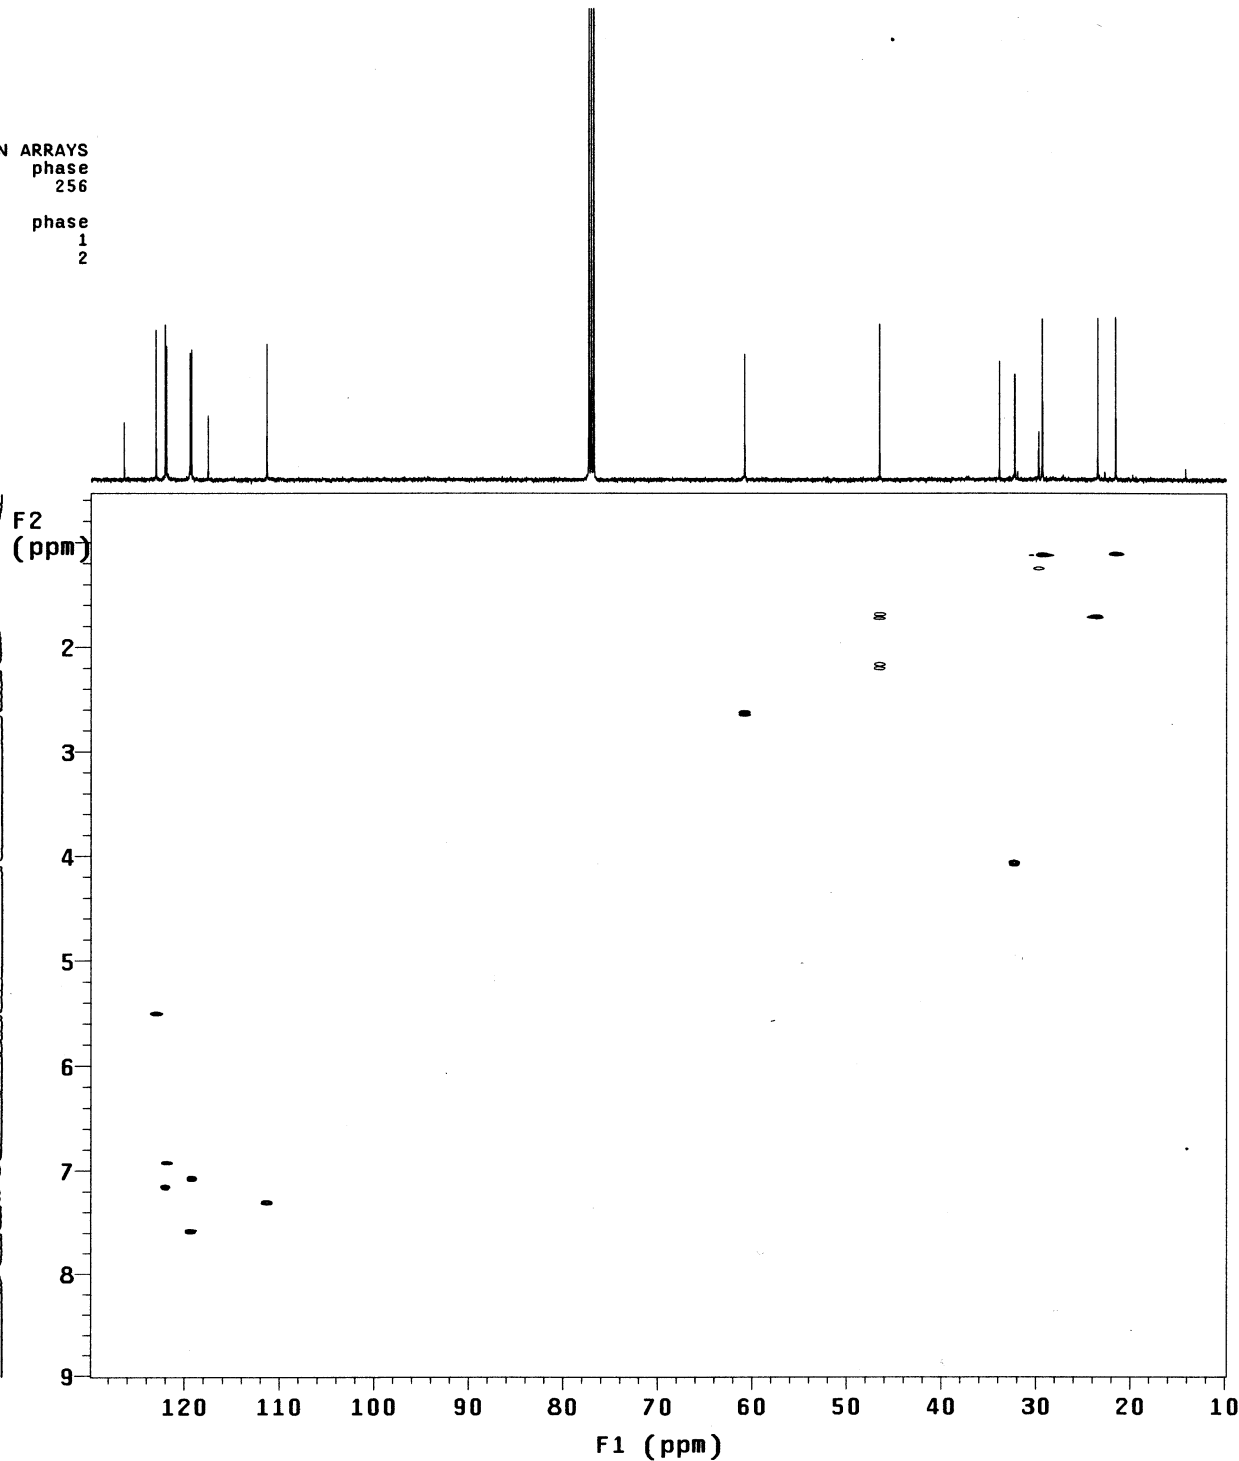

Fig S18. COSY of compound 4a.

NSD-09-68-F1

exp6 gCOSY

| SAMPLE         |            | FLAGS         |          |
|----------------|------------|---------------|----------|
| date           | Aug 1 2013 | hs            | nn       |
| solvent        | cdcl3      | sspul         | n        |
| sample         | undefined  | hsglv1        | 1006     |
| ACQUISITION    |            | SPECIAL       |          |
| sw             | 5497.5     | temp          | not used |
| at             | 0.186      | gain          | 54       |
| np             | 2048       | spin          | 0        |
| fb             | not used   | F2 PROCESSING |          |
| ss             | 16         | sb            | -0.093   |
| d1             | 1.000      | sbs           | not used |
| nt             | 8          | fn            | 2048     |
| 2D ACQUISITION |            | F1 PROCESSING |          |
| sw1            | 5497.5     | sb1           | -0.023   |
| n1             | 128        | sbs1          | not used |
| TRANSMITTER    |            | PROC1         |          |
| tn             | H1         | fn1           | 2048     |
| sfrq           | 499.833    | DISPLAY       |          |
| tof            | 249.8      | sp            | 310.9    |
| tpwr           | 61         | wp            | 4681.5   |
| pw             | 12.000     | sp1           | 312.3    |
| GRADIENTS      |            | wp1           | 4676.1   |
| gzlv11         | 1006       | rfl           | 2767.6   |
| gt1            | 0.001000   | rfp           | 2751.1   |
| gstab          | 0.000500   | rfl1          | 2766.2   |
| DECOUPLER      |            | rfl1          | 2751.1   |
| dn             | C13        | PLOT          |          |
| dm             | nnn        | wc            | 155.0    |
|                |            | sc            | 10.0     |
|                |            | wc2           | 155.0    |
|                |            | sc2           | 0        |
|                |            | vs            | 100      |
|                |            | th            | 9        |
|                |            | ai            | cdc av   |

F2 (ppm)

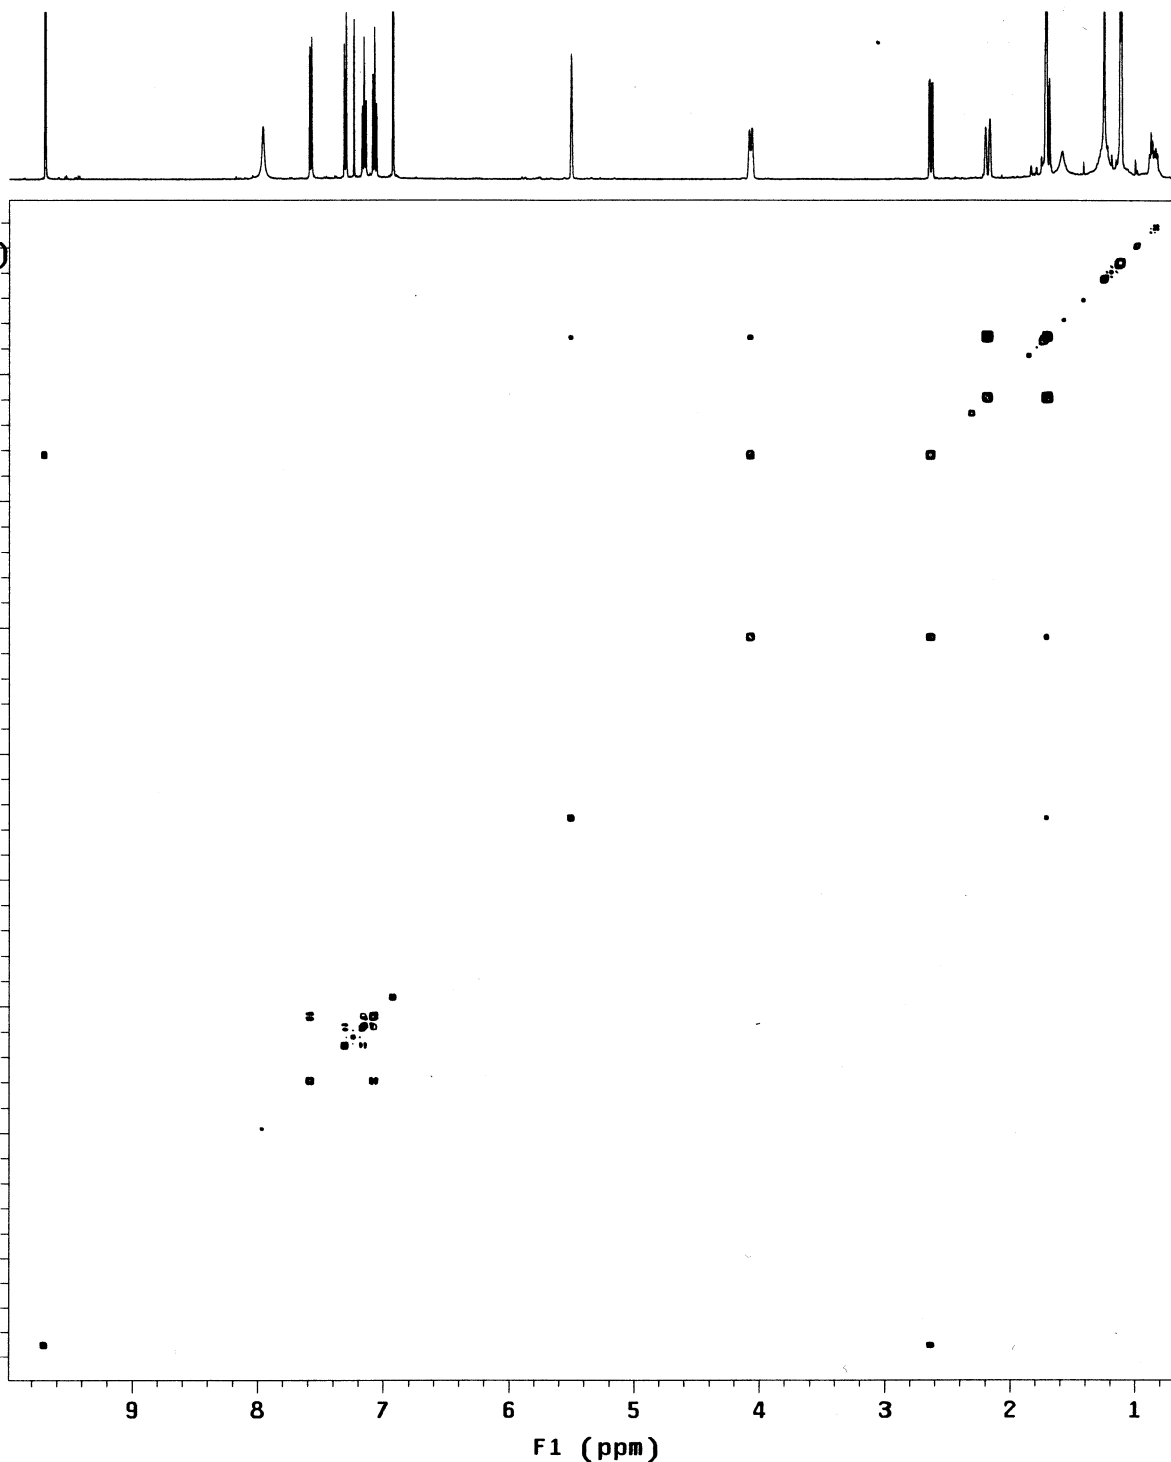

F1 (ppm)

Fig S19. NOESY of compound 4a.

NSD-09-68-F1

exp9 NOESY

| SAMPLE         |            | FLAGS         | n        |
|----------------|------------|---------------|----------|
| date           | Aug 1 2013 | hs            | y        |
| solvent        | cdc13      | sspul         | y        |
| sample         | undefined  | PFgflg        | y        |
| ACQUISITION    |            | hsglvi        | 1006     |
| sw             | 5497.5     | SPECIAL       |          |
| at             | 0.186      | temp          | not used |
| np             | 2048       | gain          | 28       |
| fb             | not used   | spin          | 0        |
| ss             | 32         | F2 PROCESSING |          |
| d1             | 1.000      | gf            | 0.086    |
| nt             | 16         | gfs           | not used |
| 2D ACQUISITION |            | fn            | 2048     |
| sw1            | 5497.5     | F1 PROCESSING |          |
| ni             | 200        | gf1           | 0.034    |
| TRANSMITTER    |            | gfs1          | not used |
| tn             | H1         | proc1         | lp       |
| sfrq           | 499.833    | fn1           | 2048     |
| tof            | 249.8      | DISPLAY       |          |
| tpwr           | 61         | sp            | 273.2    |
| pw             | 12.000     | wp            | 4719.1   |
| NOESY          |            | sp1           | 263.5    |
| mix            | 0.600      | wp1           | 4724.4   |
| PRESATURATION  |            | rfl           | 2767.8   |
| satmode        | nnnn       | rfp           | 2751.1   |
| satpwr         | 0          | rfl1          | 2766.7   |
| satdly         | 0          | rfp1          | 2751.1   |
| satfrq         | 0          | PLOT          |          |
| DECOUPLER      |            | wc            | 155.0    |
| dn             | C13        | sc            | 10.0     |
| dm             | nnn        | wc2           | 155.0    |
|                |            | sc2           | 0        |
|                |            | vs            | 205      |
|                |            | th            | 1        |
|                |            | ai            | ph       |

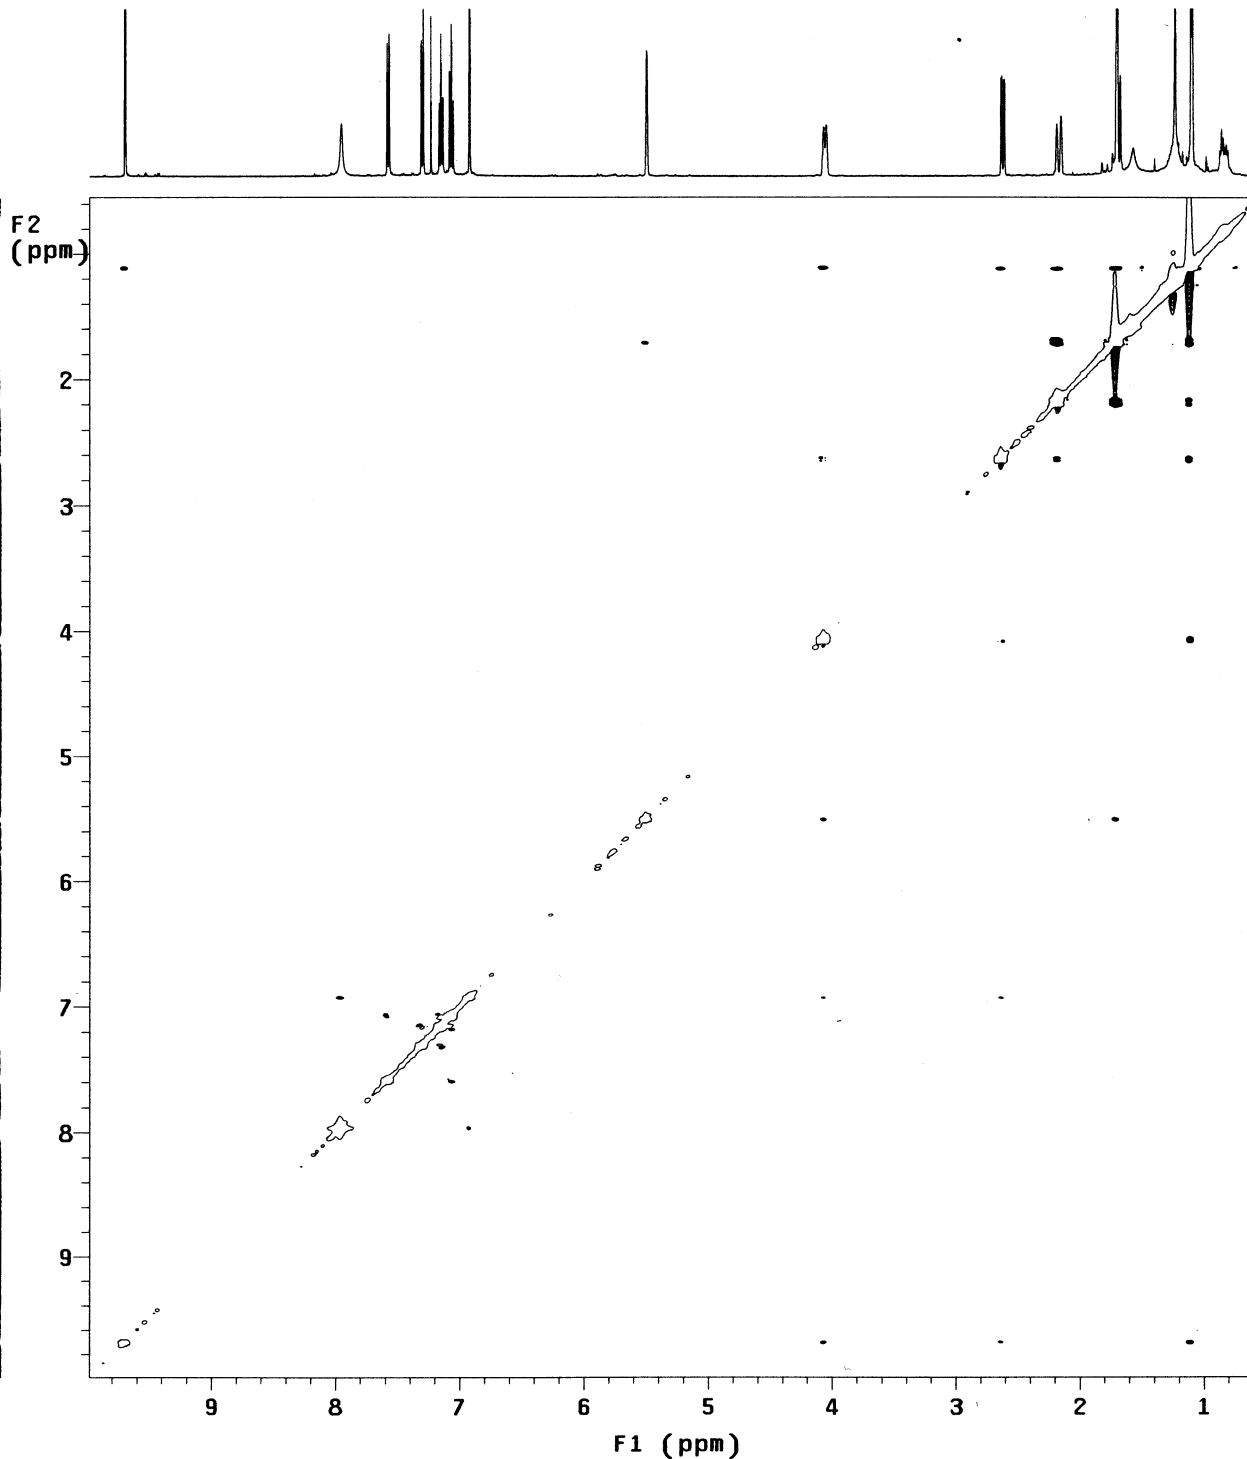

Fig S20. 1H NMR (CDCl3, 500 MHz) of compound 4b.

NSD-09-169-f1

exp70 s2pu1

|             |             |            |          |
|-------------|-------------|------------|----------|
| SAMPLE      |             | DEC. & VT  | 9.706    |
| date        | Feb 15 2014 | dfrq       | 125.694  |
| solvent     | cdc13       | dn         | C13      |
| file        | exp         | dpwr       | 30       |
| ACQUISITION |             | dof        | 0        |
| sfrq        | 499.833     | dm         | nnn      |
| tn          | Hi          | dmm        | c        |
| at          | 3.000       | dmf        | 200      |
| np          | 48000       | dseq       |          |
| sw          | 8000.0      | dres       | 1.0      |
| fb          | not used    | homo       | n        |
| bs          | 4           | PROCESSING |          |
| tpwr        | 61          | wtfile     |          |
| pw          | 4.8         | proc       | ft       |
| d1          | 1.000       | fn         | not used |
| tof         | 499.7       | math       | f        |
| nt          | 4           |            |          |
| ct          | 4           | werr       | react    |
| alock       | y           | wexp       | procplot |
| gain        | not used    | wbs        |          |
| FLAGS       |             | wnt        | wft      |
| il          | n           |            |          |
| in          | n           |            |          |
| dp          | y           |            |          |
| hs          | nn          |            |          |
| DISPLAY     |             |            |          |
| sp          | -250.1      |            |          |
| wp          | 5748.0      |            |          |
| vs          | 80          |            |          |
| sc          | 0           |            |          |
| wc          | 210         |            |          |
| hzmm        | 27.37       |            |          |
| is          | 33.57       |            |          |
| rfl         | 4636.0      |            |          |
| rfp         | 3618.8      |            |          |
| th          | 2           |            |          |
| ins         | 1.000       |            |          |
| nm          | cdc ph      |            |          |

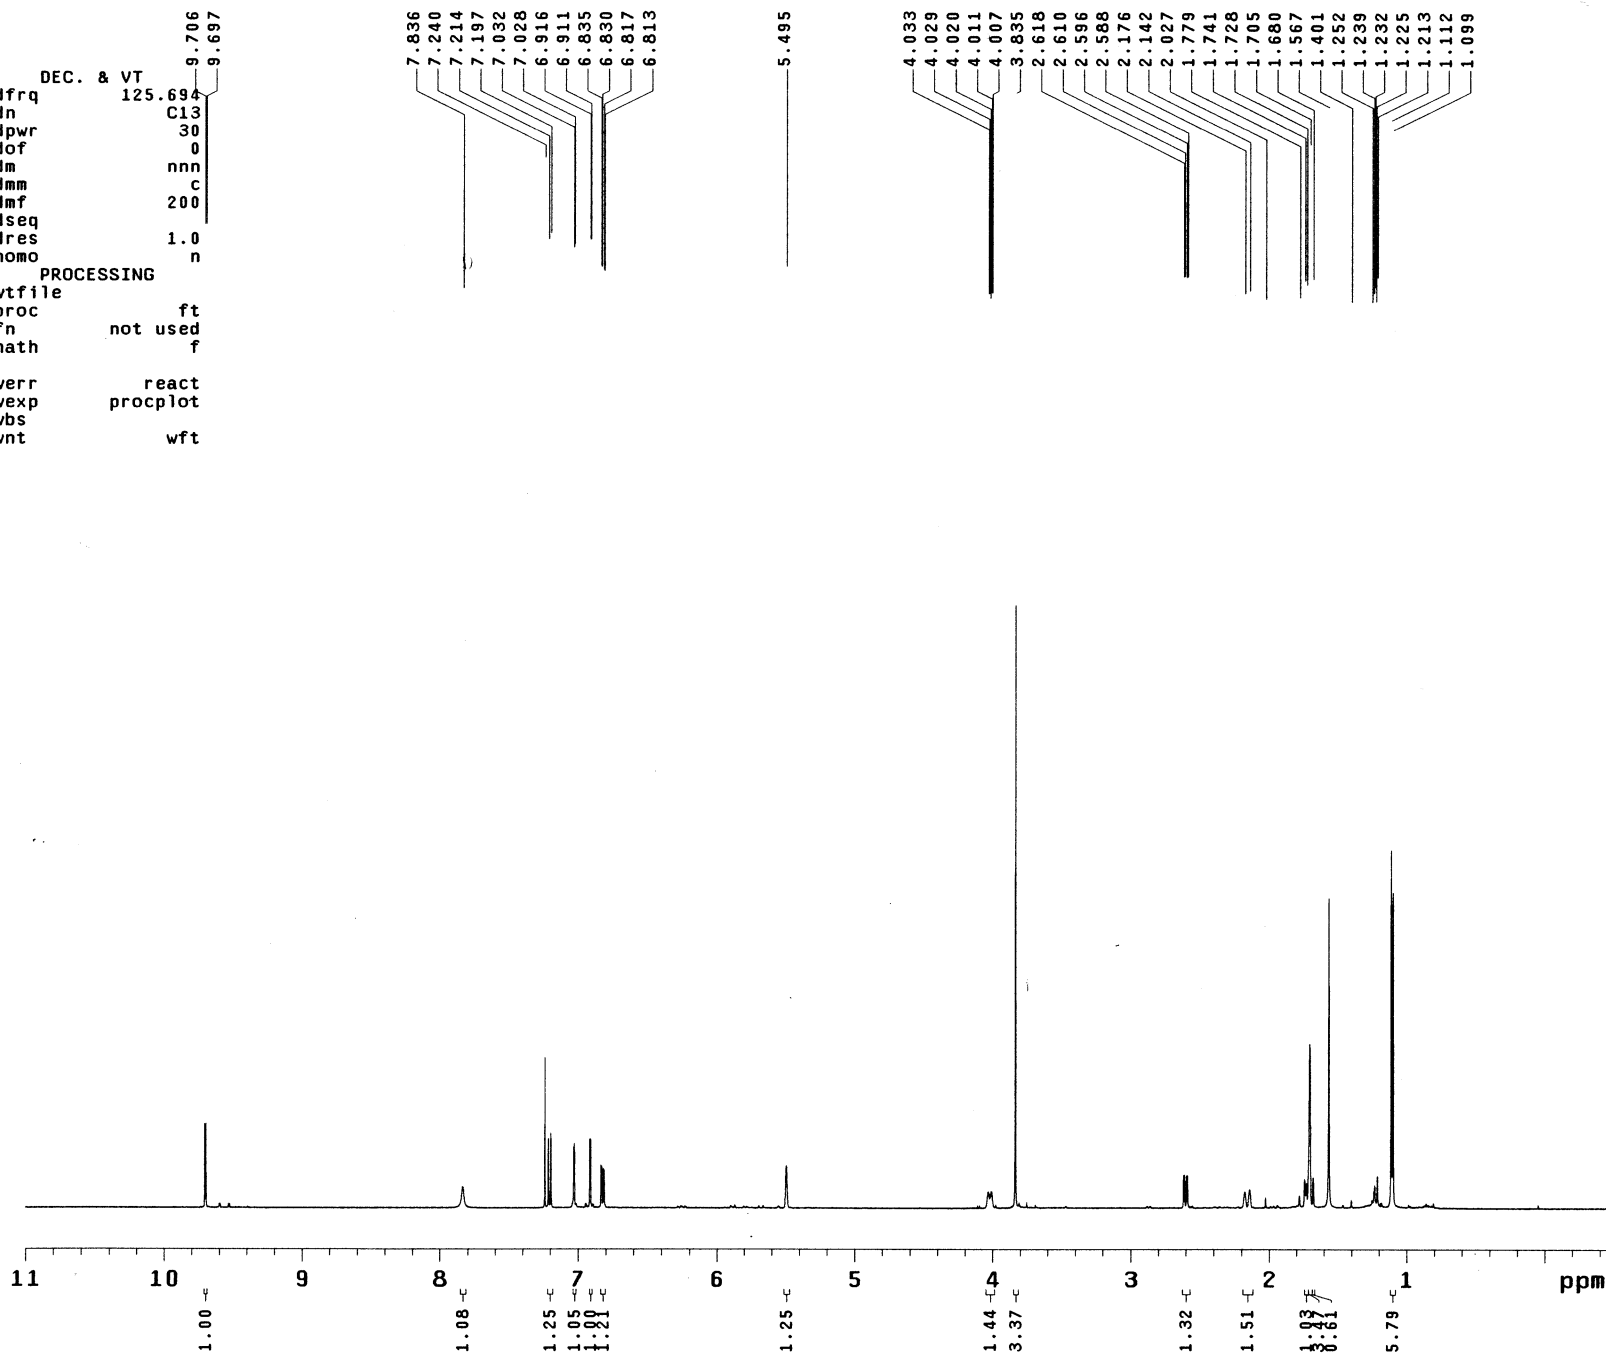

```

NSD-09-169-f1
exp71 s2pu1

SAMPLE
date Feb 15 2014 dfrq 499.833
solvent cdc13 dn H1
file exp dpwr 44
ACQUISITION dof 0
sfrq 125.697 dm yyy
tn C13 dmm w
at 1.000 dmf 10870
np 62894 dseq
sw 31446.5 dres 1.0
fb not used homo n
bs 16
ss 2
tpwr 60
pw 4.0
d1 1.000
tof 2512.2
nt 6000
ct 6000
alock y
gain not used
FLAGS
il n
in n
dp y
hs nn

DISPLAY
sp -1257.0
wp 28906.3
vs 400
sc 0
wc 210
hzmm 137.65
is 500.00
rfl 10980.6
rfp 9677.5
th 6
ins 100.000
nm cdc ph

DEC. & VT
206.471
153.632
131.817
131.756
126.769
122.906
122.700
117.156
111.903
111.842
101.572
77.252
77.000
76.740
60.629
55.872
46.473
33.828
32.102
29.277
23.436
21.527

```

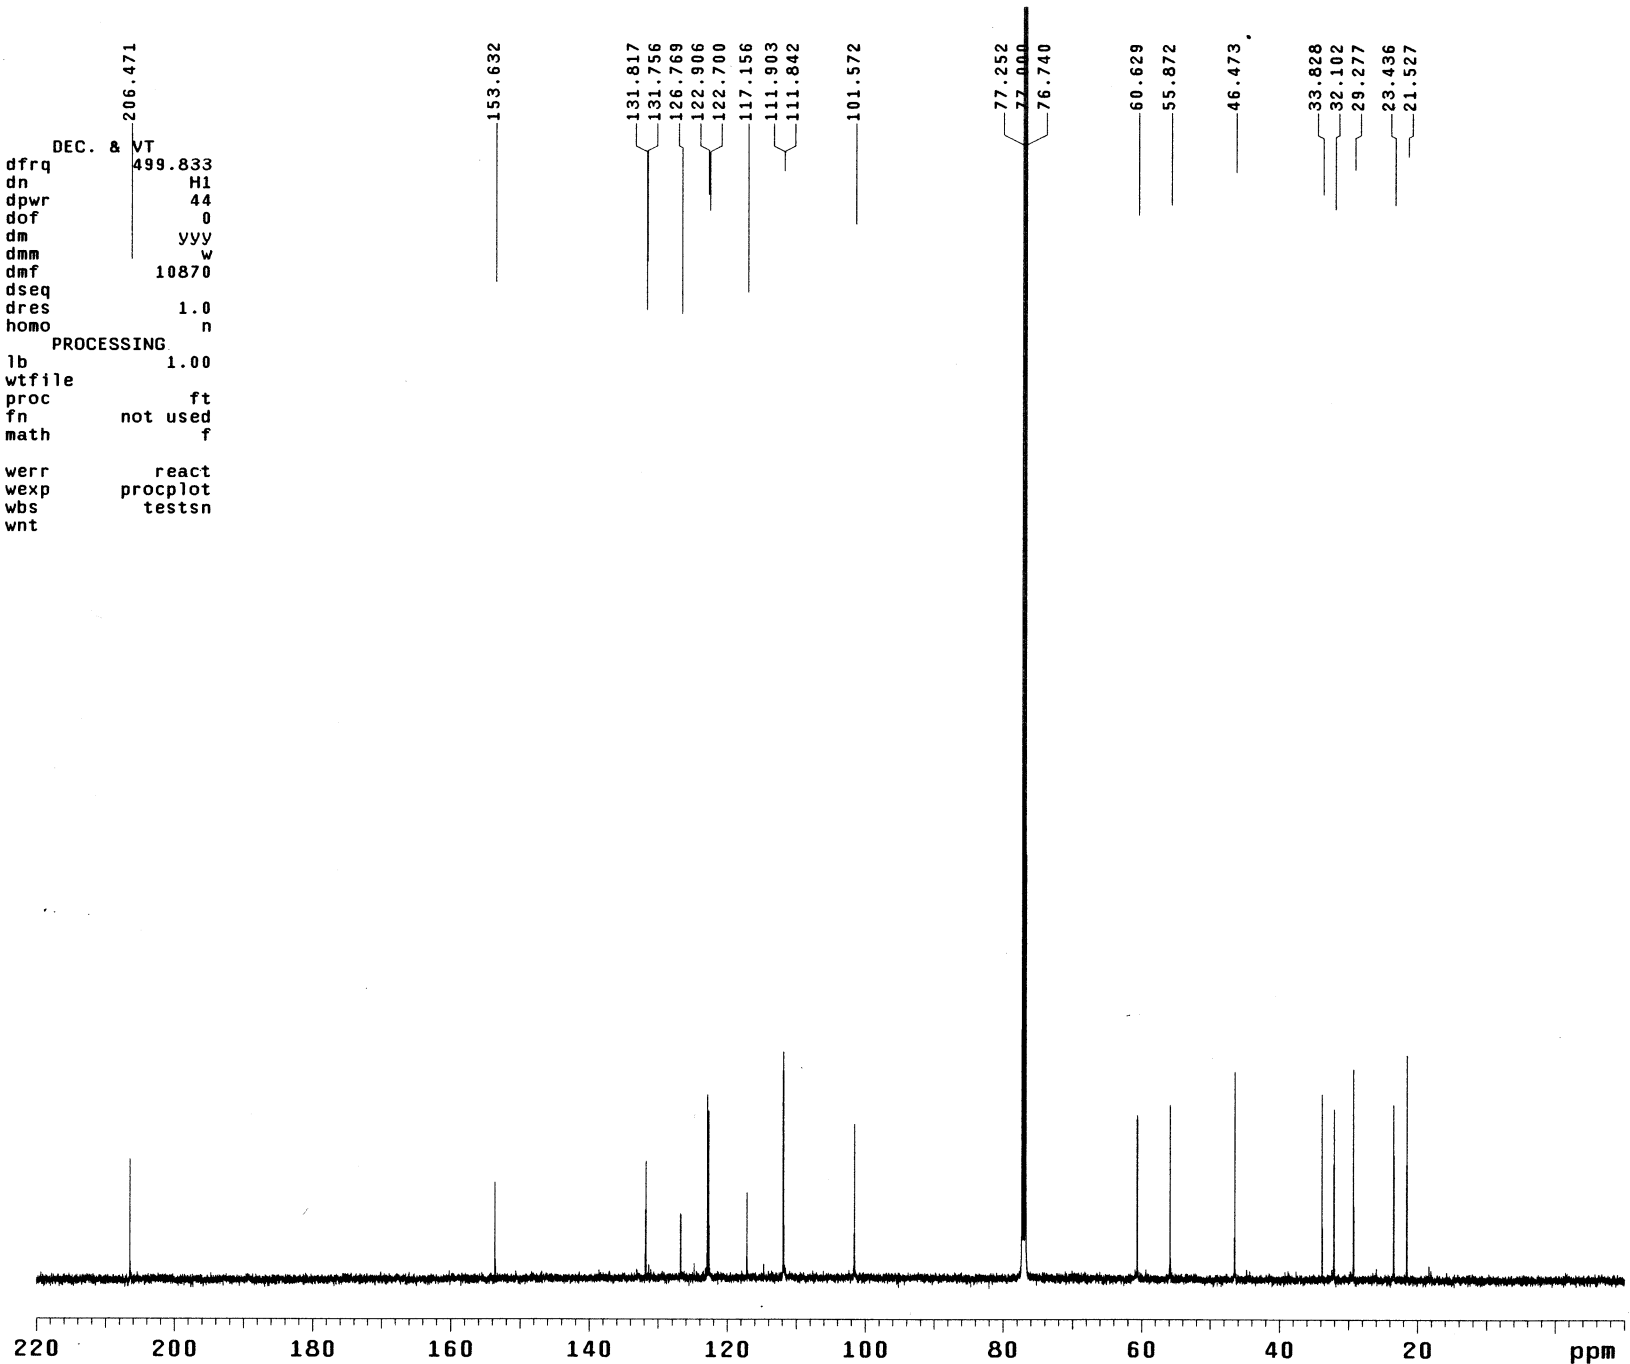Fig S21. 13C NMR (CDCl<sub>3</sub>, 125 MHz) of compound 4b.

Fig S22. DEPT of compound 4b.

NSD-09-169-f1

exp72 DEPT

|         |             |            |          |          |          |      |
|---------|-------------|------------|----------|----------|----------|------|
| date    | Feb 15 2014 | j1xh       | DEPT     | 140.0    | array    | mult |
| solvent | cdcl3       | mult       | arrayed  |          | arraydim | 3    |
| sample  | undefined   | SPECIAL    |          | not used | i        | mult |
| sw      | ACQUISITION | temp       | not used |          | 1        | 0.5  |
| at      | 31446.5     | gain       | 34       | 1        | 2        | 1    |
| np      | 1.000       | spin       | 0        | 2        | 3        | 1.5  |
| bs      | 62894       | PROCESSING |          | 1.00     |          |      |
| ss      | 16          | lb         | 1.00     |          |          |      |
| d1      | -4          | fn         | not used |          |          |      |
| nt      | 1.000       | SPECTRUM   |          |          |          |      |
| ct      | 3000        | wp         | 28906.3  |          |          |      |
| tn      | 3000        | sp         | -1257.0  |          |          |      |
| tof     | TRANSMITTER | rp         | -0.9     |          |          |      |
| tpwr    | C13         | lp         | 87.8     |          |          |      |
| pw      | 2512.2      | ai         | cdc ph   |          |          |      |
| dn      | 60          | REFERENCE  |          |          |          |      |
| dof     | 10.400      | rfl        | 1303.0   |          |          |      |
| dpwr    | DECOUPLER   | rfp        | 0        |          |          |      |
| dm      | H1          | PLOT       |          |          |          |      |
| dmm     | 0           | wc         | 210      |          |          |      |
| dmf     | 44          | sc         | 0        |          |          |      |
| pp1v1   | nny         | vs         | 600      |          |          |      |
| pp      | 61          | ccw        | 137.65   |          |          |      |
|         | 14.600      | th         | 68       |          |          |      |

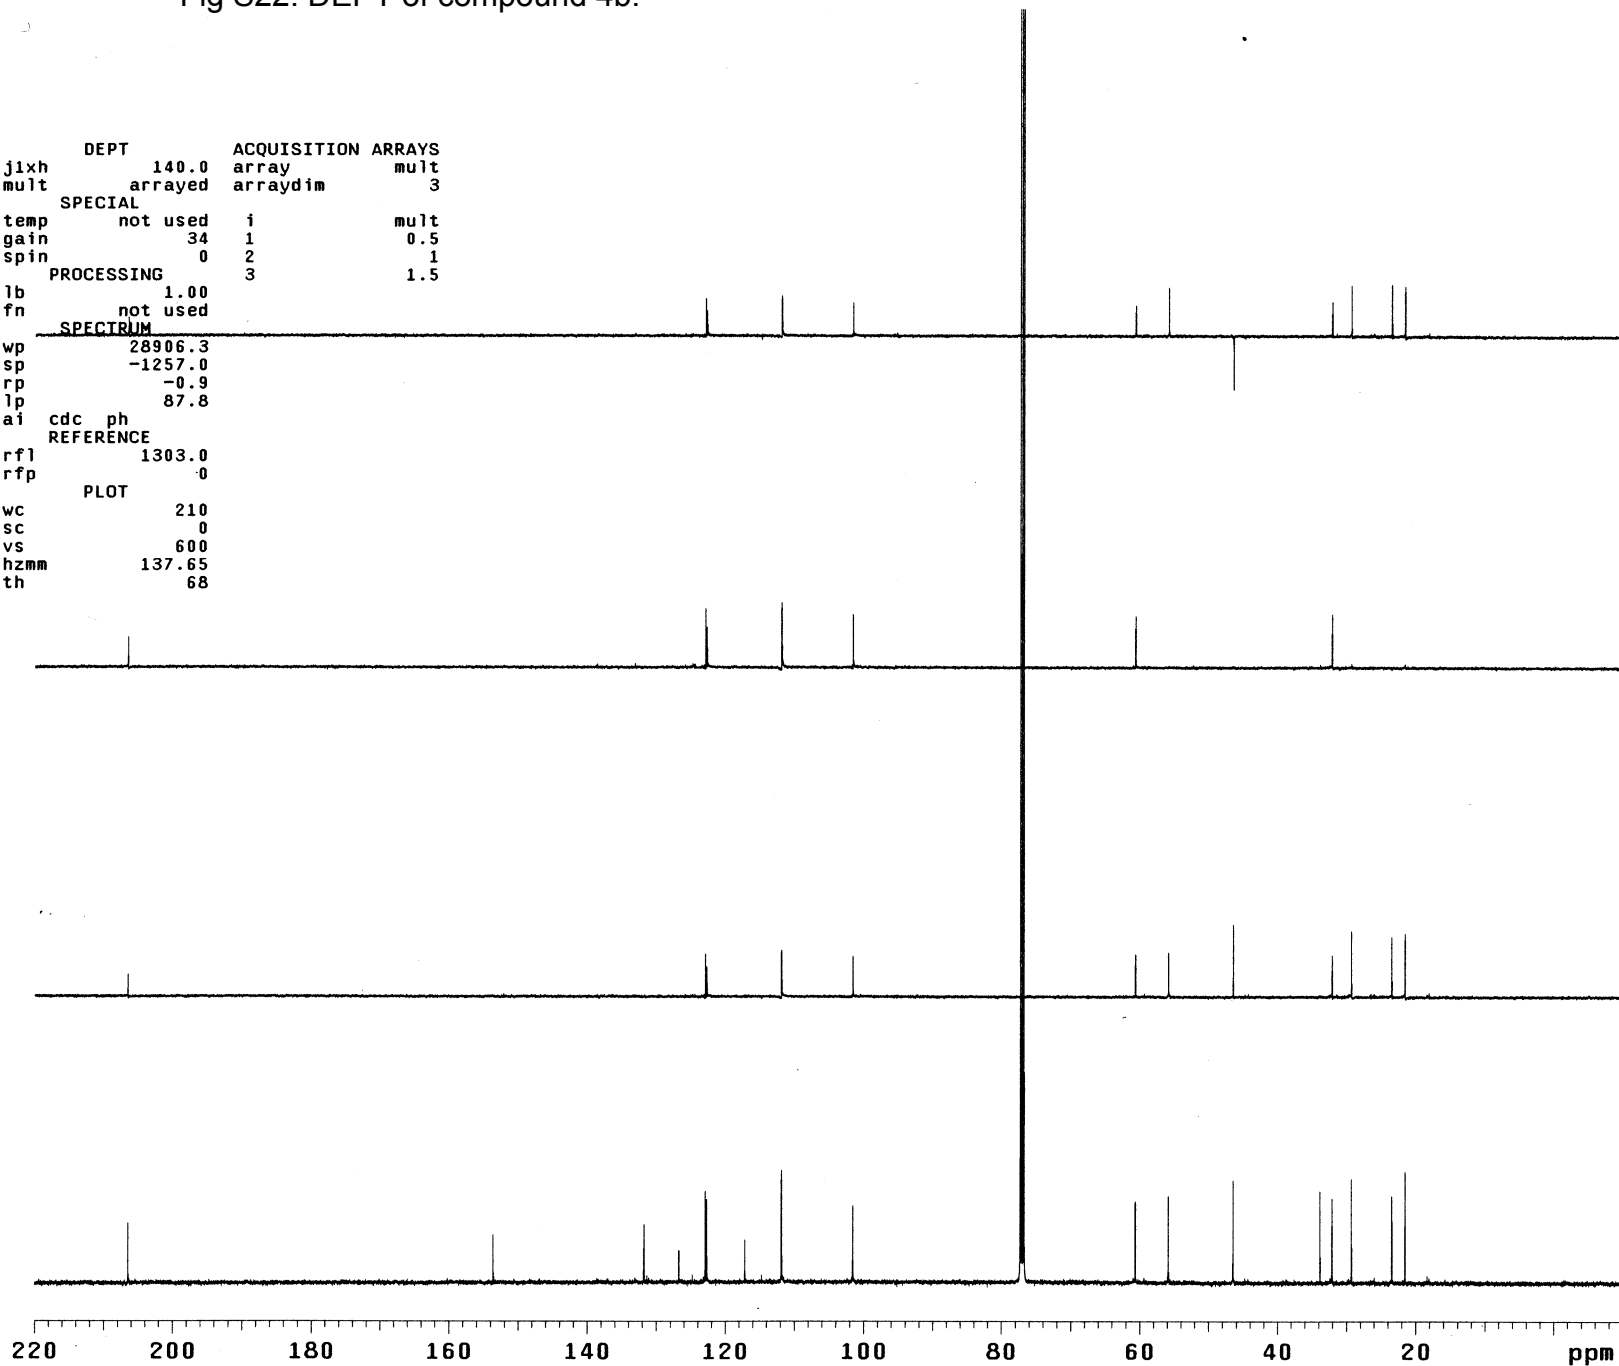

Fig S23. HMQC of compound 4b.

NSD-09-169-f1

exp75 gHMQC

| SAMPLE         |             | FLAGS         |          | ACQUISITION |       | ARRAYS |  |
|----------------|-------------|---------------|----------|-------------|-------|--------|--|
| date           | Feb 15 2014 | hs            | n        | array       | phase |        |  |
| solvent        | cdcl3       | sspul         | y        | arraydim    | 256   |        |  |
| sample         | undefined   | PFGflg        | y        |             |       |        |  |
| ACQUISITION    |             | hsglv1        | 1009     | i           | phase |        |  |
| sw             | 5006.3      | SPECIAL       | 1        | 1           | 1     |        |  |
| at             | 0.205       | temp          | not used | 2           | 2     |        |  |
| np             | 2048        | gain          | 54       |             |       |        |  |
| fb             | not used    | spin          | 0        |             |       |        |  |
| ss             | 32          | GRADIENTS     |          |             |       |        |  |
| d1             | 1.000       | gzlv11        | 1009     |             |       |        |  |
| nt             | 8           | gt1           | 0.001000 |             |       |        |  |
| 2D ACQUISITION |             | gzlv13        | 508      |             |       |        |  |
| sw1            | 21367.5     | gt3           | 0.001000 |             |       |        |  |
| ni             | 128         | gstab         | 0.000500 |             |       |        |  |
| phase          | arrayed     | F2 PROCESSING |          |             |       |        |  |
| TRANSMITTER    |             | gf            | 0.094    |             |       |        |  |
| tn             | H1          | gfs           | not used |             |       |        |  |
| sfrq           | 499.833     | fn            | 2048     |             |       |        |  |
| tof            | -0.1        | F1 PROCESSING |          |             |       |        |  |
| tpwr           | 61          | gf1           | 0.006    |             |       |        |  |
| pw             | 12.900      | gfs1          | not used |             |       |        |  |
| DECOUPLER      |             | proci         | 1p       |             |       |        |  |
| dn             | C13         | fn1           | 2048     |             |       |        |  |
| dof            | -2515.1     | DISPLAY       |          |             |       |        |  |
| dm             | nny         | sp            | 401.4    |             |       |        |  |
| dmm            | ccp         | wp            | 3324.5   |             |       |        |  |
| dmf            | 32258       | sp1           | 1859.3   |             |       |        |  |
| dpwr           | 42          | wp1           | 13897.2  |             |       |        |  |
| pwxlvl         | 59          | rfl           | 1935.9   |             |       |        |  |
| pw             | 12.200      | rflp          | 1916.8   |             |       |        |  |
| HMQC           |             | rfl1          | 8313.7   |             |       |        |  |
| j1xh           | 140.0       | rflp1         | 7022.1   |             |       |        |  |
| nullflg        | y           | PLOT          |          |             |       |        |  |
|                |             | wc            | 150.0    |             |       |        |  |
|                |             | sc            | 6.2      |             |       |        |  |
|                |             | wc2           | 116.2    |             |       |        |  |
|                |             | sc2           | 0        |             |       |        |  |
|                |             | vs            | 475      |             |       |        |  |
|                |             | th            | 5        |             |       |        |  |
|                |             | ai            | cdc ph   |             |       |        |  |

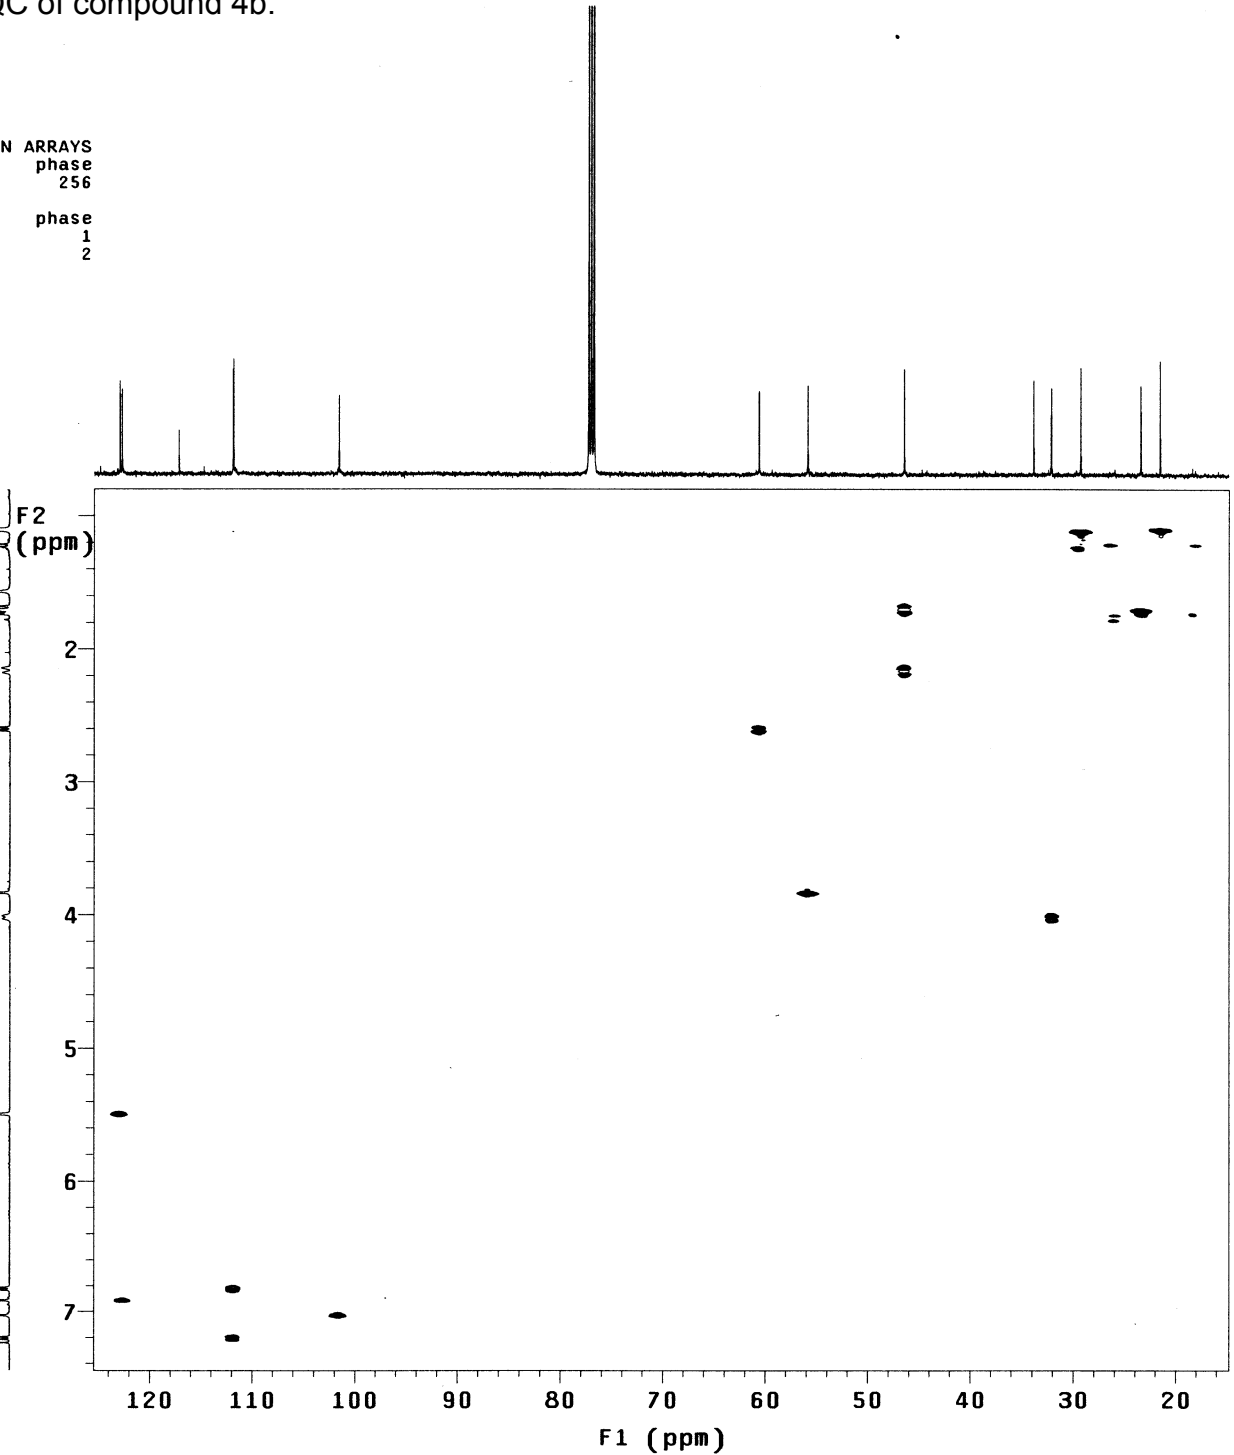

Fig S24. COSY of compound 4b.

NSD-09-169-f1

exp73 gCOSY

| SAMPLE         |             | FLAGS         |          |
|----------------|-------------|---------------|----------|
| date           | Feb 15 2014 | hs            | nn       |
| solvent        | cdcl3       | sspul         | n        |
| sample         | undefined   | hsglv1        | 1009     |
| ACQUISITION    |             | SPECIAL       |          |
| sw             | 5006.3      | temp          | not used |
| at             | 0.205       | gain          | 24       |
| np             | 2048        | spin          | 0        |
| fb             | not used    | F2 PROCESSING |          |
| ss             | 16          | sb            | -0.102   |
| d1             | 1.000       | sbs           | not used |
| nt             | 8           | fn            | 2048     |
| 2D ACQUISITION |             | F1 PROCESSING |          |
| sw1            | 5006.3      | sb1           | -0.026   |
| ni             | 128         | sbs1          | not used |
| TRANSMITTER    |             | PROC1         |          |
| tn             | H1          | lp            | 2048     |
| sfrq           | 499.833     | DISPLAY       |          |
| tof            | -0.1        | sp            | 311.8    |
| tpwr           | 61          | wp            | 4595.6   |
| pw             | 12.900      | sp1           | 312.5    |
| GRADIENTS      |             | wp1           | 4595.6   |
| gzlv11         | 1009        | rfl           | 2767.2   |
| gt1            | 0.001000    | rfp           | 2746.6   |
| gstab          | 0.000500    | rfl1          | 2766.5   |
| DECOUPLER      |             | rfp1          | 2746.6   |
| dn             | C13         | PLOT          |          |
| dm             | nnn         | wc            | 155.0    |
|                |             | sc            | 10.0     |
|                |             | wc2           | 155.0    |
|                |             | sc2           | 0        |
|                |             | vs            | 475      |
|                |             | th            | 6        |
|                |             | ai            | cdc av   |

F2 (ppm)

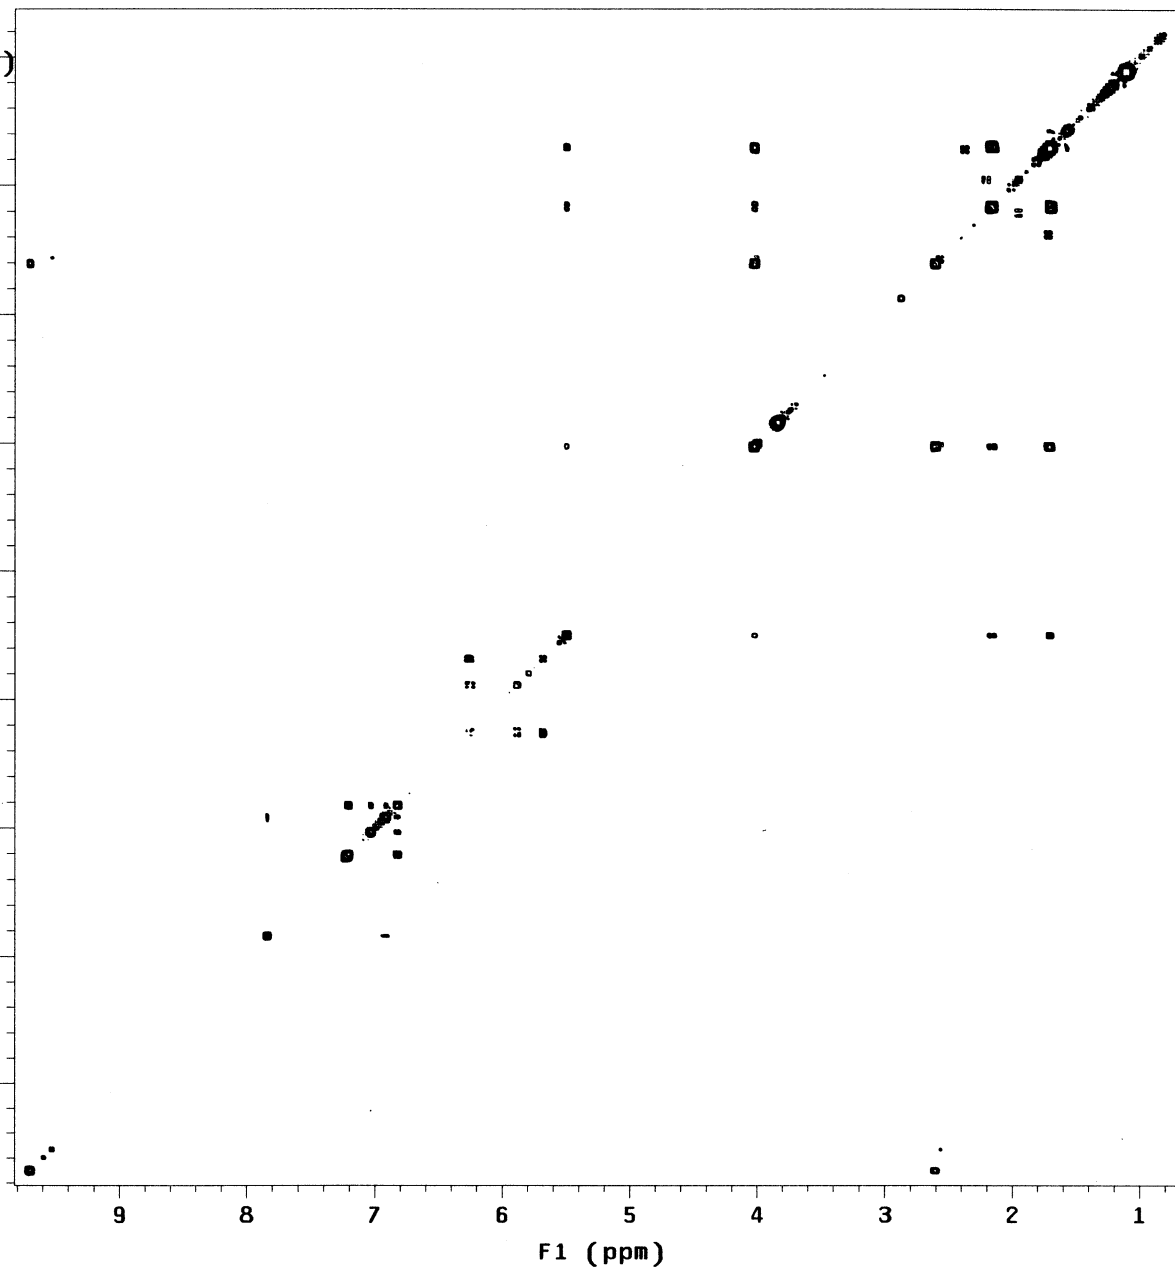



Fig S25. NOESY of compound 4b.

NSD-09-169-f1

exp76 NOESY

| SAMPLE         |             | FLAGS         |          |
|----------------|-------------|---------------|----------|
| date           | Feb 17 2014 | hs            | n        |
| solvent        | cdc13       | sspul         | y        |
| sample         | undefined   | PFGflg        | y        |
| ACQUISITION    |             | hsglv1        | 1009     |
| sw             | 5006.3      | SPECIAL       |          |
| at             | 0.205       | temp          | not used |
| np             | 2048        | gain          | 34       |
| fb             | not used    | spin          | 0        |
| ss             | 32          | F2 PROCESSING |          |
| d1             | 1.000       | gf            | 0.094    |
| nt             | 16          | gfs           | not used |
| 2D ACQUISITION |             | fn            | 2048     |
| sw1            | 5006.3      | F1 PROCESSING |          |
| n1             | 200         | gf1           | 0.037    |
| TRANSMITTER    |             | gfs1          | not used |
| tn             | H1          | proc1         | lp       |
| sfrq           | 499.833     | fn1           | 2048     |
| tof            | -0.1        | DISPLAY       |          |
| tpwr           | 61          | sp            | 330.8    |
| pw             | 12.900      | wp            | 4561.4   |
| NOESY          |             | sp1           | 329.2    |
| mix            | 0.600       | wp1           | 4561.4   |
| PRESATURATION  |             | rfl           | 3937.9   |
| satmode        | nnnn        | rfp           | 3916.7   |
| satpwr         | 0           | rfl1          | 3939.5   |
| satdly         | 0           | rfl1          | 3916.7   |
| satfrq         | 0           | PLOT          |          |
| DECOUPLER      |             | wc            | 155.0    |
| dn             | C13         | sc            | 10.0     |
| dm             | nnn         | wc2           | 155.0    |
|                |             | sc2           | 0        |
|                |             | vs            | 113      |
|                |             | th            | 1        |
|                |             | ai            | ph       |

F2 (ppm)

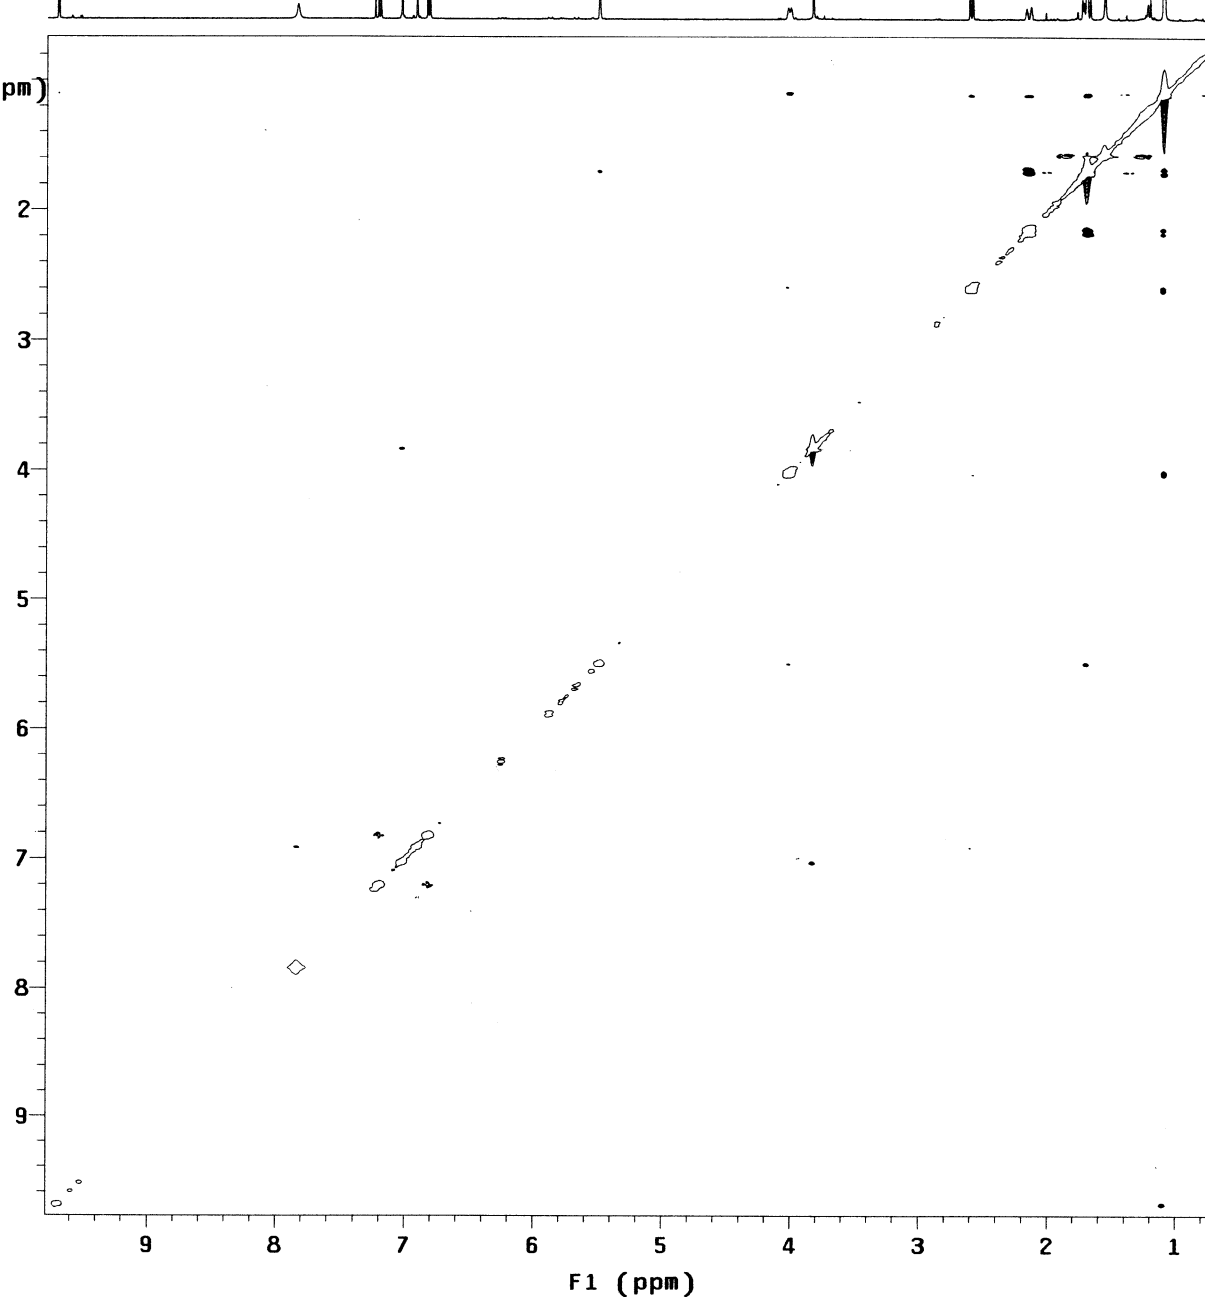

Fig S26. <sup>1</sup>H NMR (CDCl<sub>3</sub>, 500 MHz) of compound 4c.

NSD-09-175-F1

exp93 s2pu1

|             |             |            |          |
|-------------|-------------|------------|----------|
| SAMPLE      |             | DEC. & VT  |          |
| date        | Mar 21 2014 | dfrq       | 125.694  |
| solvent     | cdc13       | dn         | C13      |
| file        | exp         | dpwr       | 30       |
| ACQUISITION |             | dof        | 0        |
| sfrq        | 499.833     | dm         | nnn      |
| tn          | H1          | dmm        | c        |
| at          | 3.000       | dmf        | 200      |
| np          | 48000       | dseq       |          |
| sw          | 8000.0      | dres       | 1.0      |
| fb          | not used    | homo       | n        |
| bs          | 4           | PROCESSING |          |
| tpwr        | 61          | wtfile     |          |
| pw          | 4.8         | proc       | ft       |
| d1          | 1.000       | fn         | not used |
| tof         | 499.7       | math       | f        |
| nt          | 4           |            |          |
| ct          | 4           | werr       | react    |
| alock       | y           | wexp       | procplot |
| gain        | not used    | wbs        |          |
| FLAGS       |             | wnt        | wft      |
| il          | n           |            |          |
| in          | n           |            |          |
| dp          | y           |            |          |
| hs          | nn          |            |          |
| DISPLAY     |             |            |          |
| sp          | -250.1      |            |          |
| wp          | 5748.0      |            |          |
| vs          | 120         |            |          |
| sc          | 0           |            |          |
| wc          | 210         |            |          |
| hzmm        | 27.37       |            |          |
| is          | 33.57       |            |          |
| rfl         | 4636.0      |            |          |
| rfp         | 3618.8      |            |          |
| th          | 3           |            |          |
| ins         | 100.000     |            |          |
| nm          | cdc ph      |            |          |

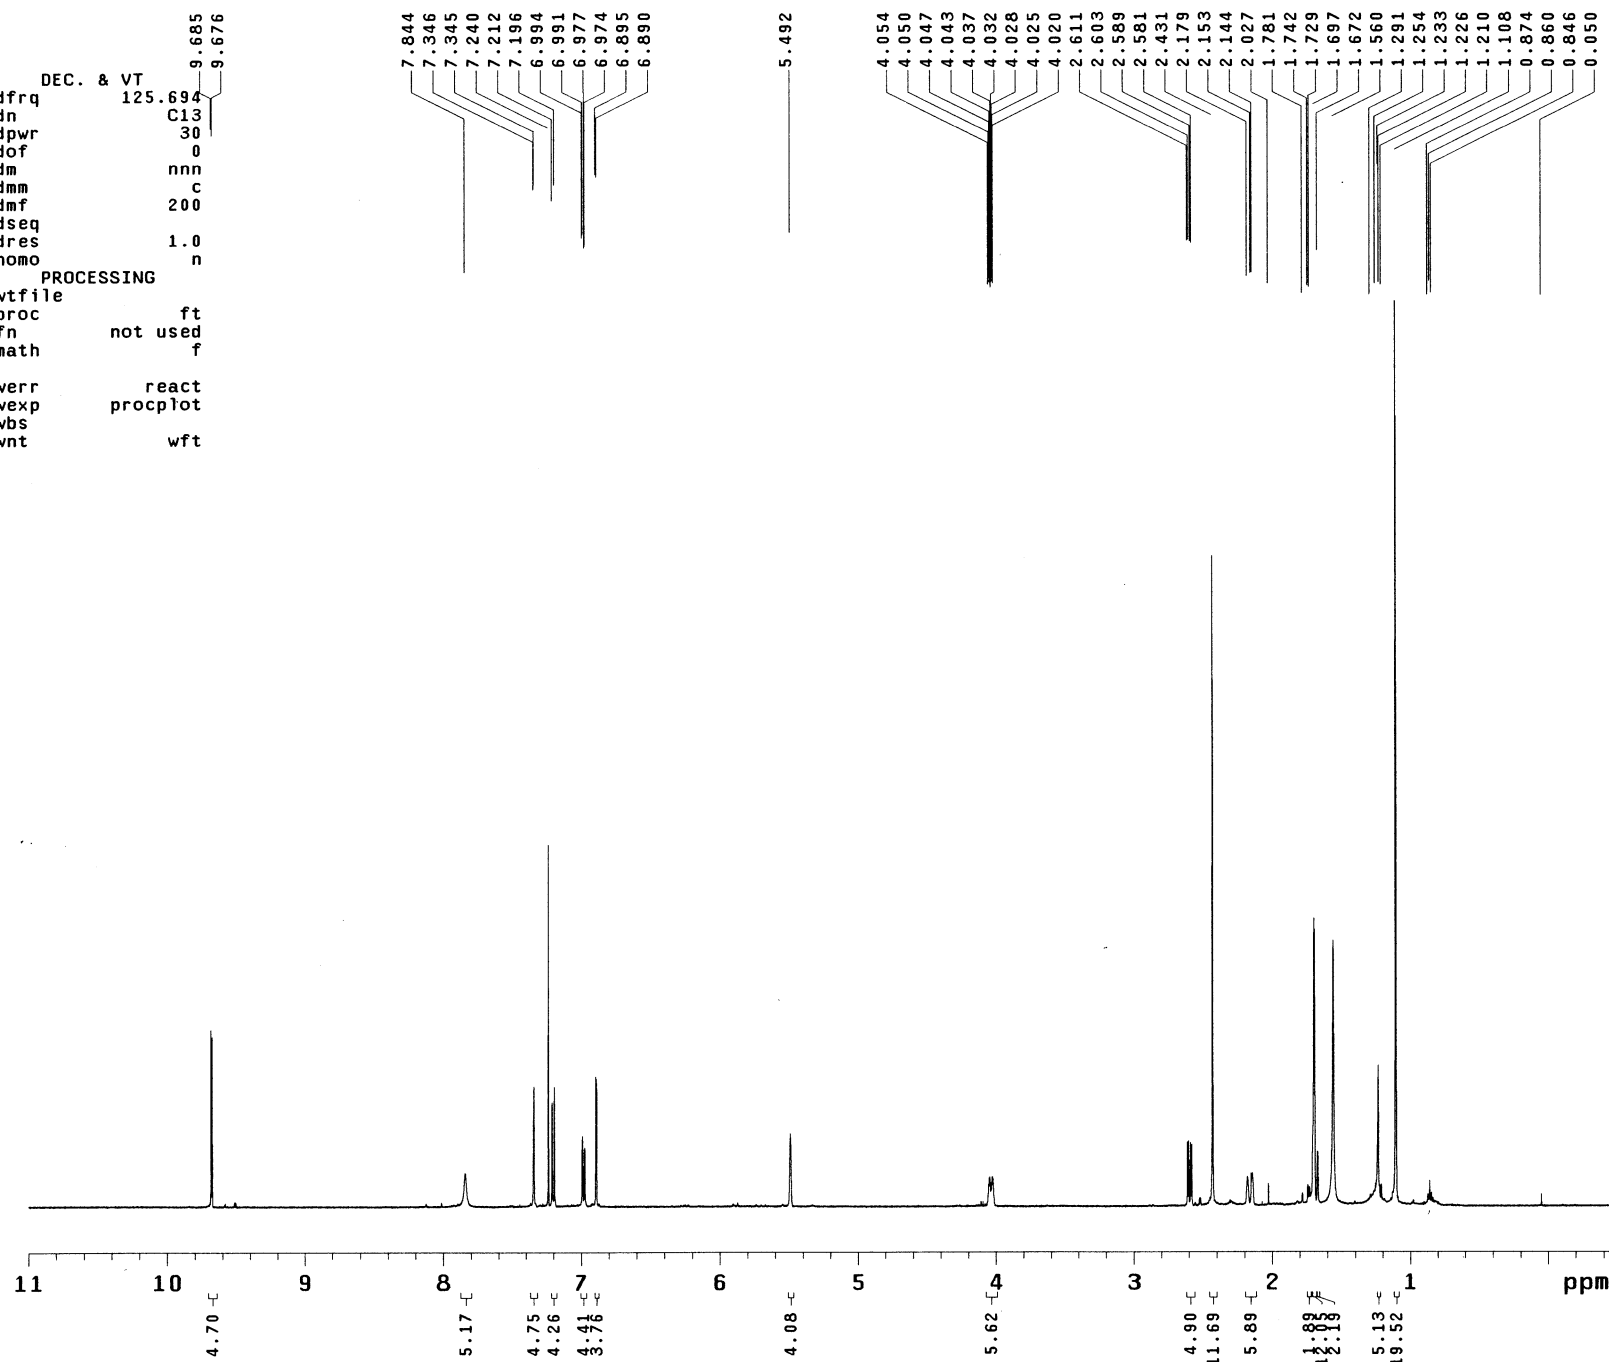

```

NSD-09-175-F1
exp94 s2pu1

SAMPLE
date Mar 21 2014 dfrq 499.833
solvent cdc13 dn H1
file exp dpwr 44
ACQUISITION dof 0
sfrq 125.697 dm yvy
tn C13 dmm w
at 1.000 dmf 10870
np 62894 dseq
sw 31446.5 dres 1.0
fb not used homo n
bs 16
ss 2 PROCESSING
tpwr 60 wtfile
pw 4.0 proc ft
dl 1.000 fn not used
tof 2512.2 math f
nt 2048
ct 2048 werr react
alock y wexp procplot
gain not used wbs testsn
wnt

FLAGS
il n
in n
dp y
hs nn

DISPLAY
sp -1257.0
wp 28906.3
vs 800
sc 0
wc 210
hzmm 137.65
is 500.00
rf1 10979.6
rfp 9677.5
th 6
ins 100.000
nm cdc ph

```

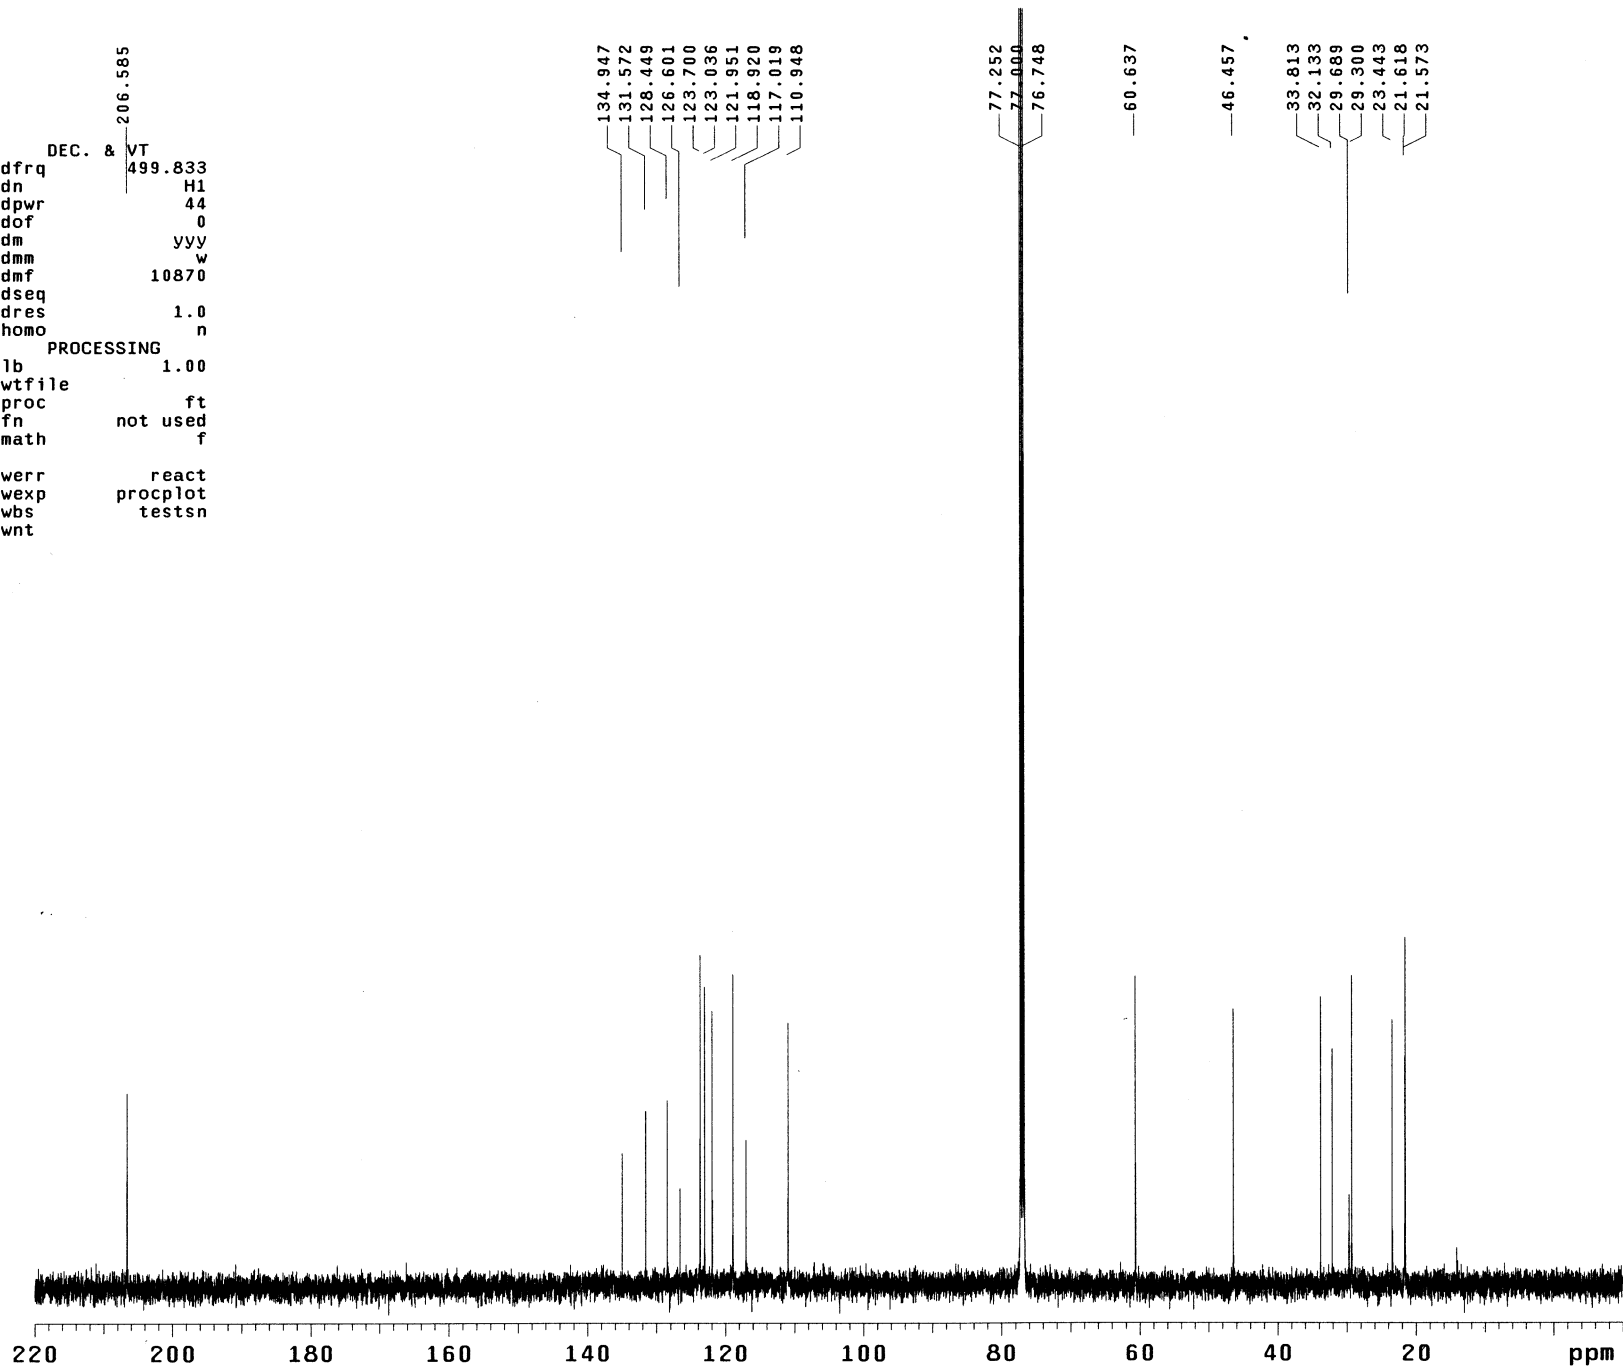

Fig S27.  $^{13}\text{C}$  NMR ( $\text{CDCl}_3$ , 125 MHz) of compound 4c.

Fig S28. DEPT of compound 4c.

NSD-09-175-F1

exp95 DEPT

| SAMPLE      |             | DEPT          | ACQUISITION ARRAYS |       |
|-------------|-------------|---------------|--------------------|-------|
| date        | Mar 21 2014 | j1xh 140.0    | array              | mult  |
| solvent     | cdcl3       | mult arrayed  | arraydim           | 3     |
| sample      | undefined   | SPECIAL       |                    |       |
| ACQUISITION |             | temp not used | i                  | mult  |
| sw          | 31446.5     | gain 54       | 1                  | 0.5   |
| at          | 1.000       | spin 0        | 2                  | 1     |
| np          | 62894       | PROCESSING    |                    | 3 1.5 |
| bs          | 16          | lb 1.00       |                    |       |
| ss          | -4          | fn not used   |                    |       |
| d1          | 1.000       | SPECTRUM      |                    |       |
| nt          | 1536        | wp 28906.3    |                    |       |
| ct          | 1536        | sp -1257.0    |                    |       |
| TRANSMITTER |             | rp -26.8      |                    |       |
| tn          | C13         | lp 141.5      |                    |       |
| tof         | 2512.2      | ai cdc ph     |                    |       |
| tpwr        | 60          | REFERENCE     |                    |       |
| pw          | 10.400      | rfl 1302.1    |                    |       |
| DECOUPLER   |             | rfp 0         |                    |       |
| dn          | H1          | PLOT          |                    |       |
| dof         | 0           | wc 210        |                    |       |
| dpwr        | 44          | sc 0          |                    |       |
| dm          | nny         | vs 1000       |                    |       |
| dmm         | ccw         | hzmm 137.65   |                    |       |
| dmf         | 10870       | th 68         |                    |       |
| pp1v1       | 61          |               |                    |       |
| pp          | 14.600      |               |                    |       |

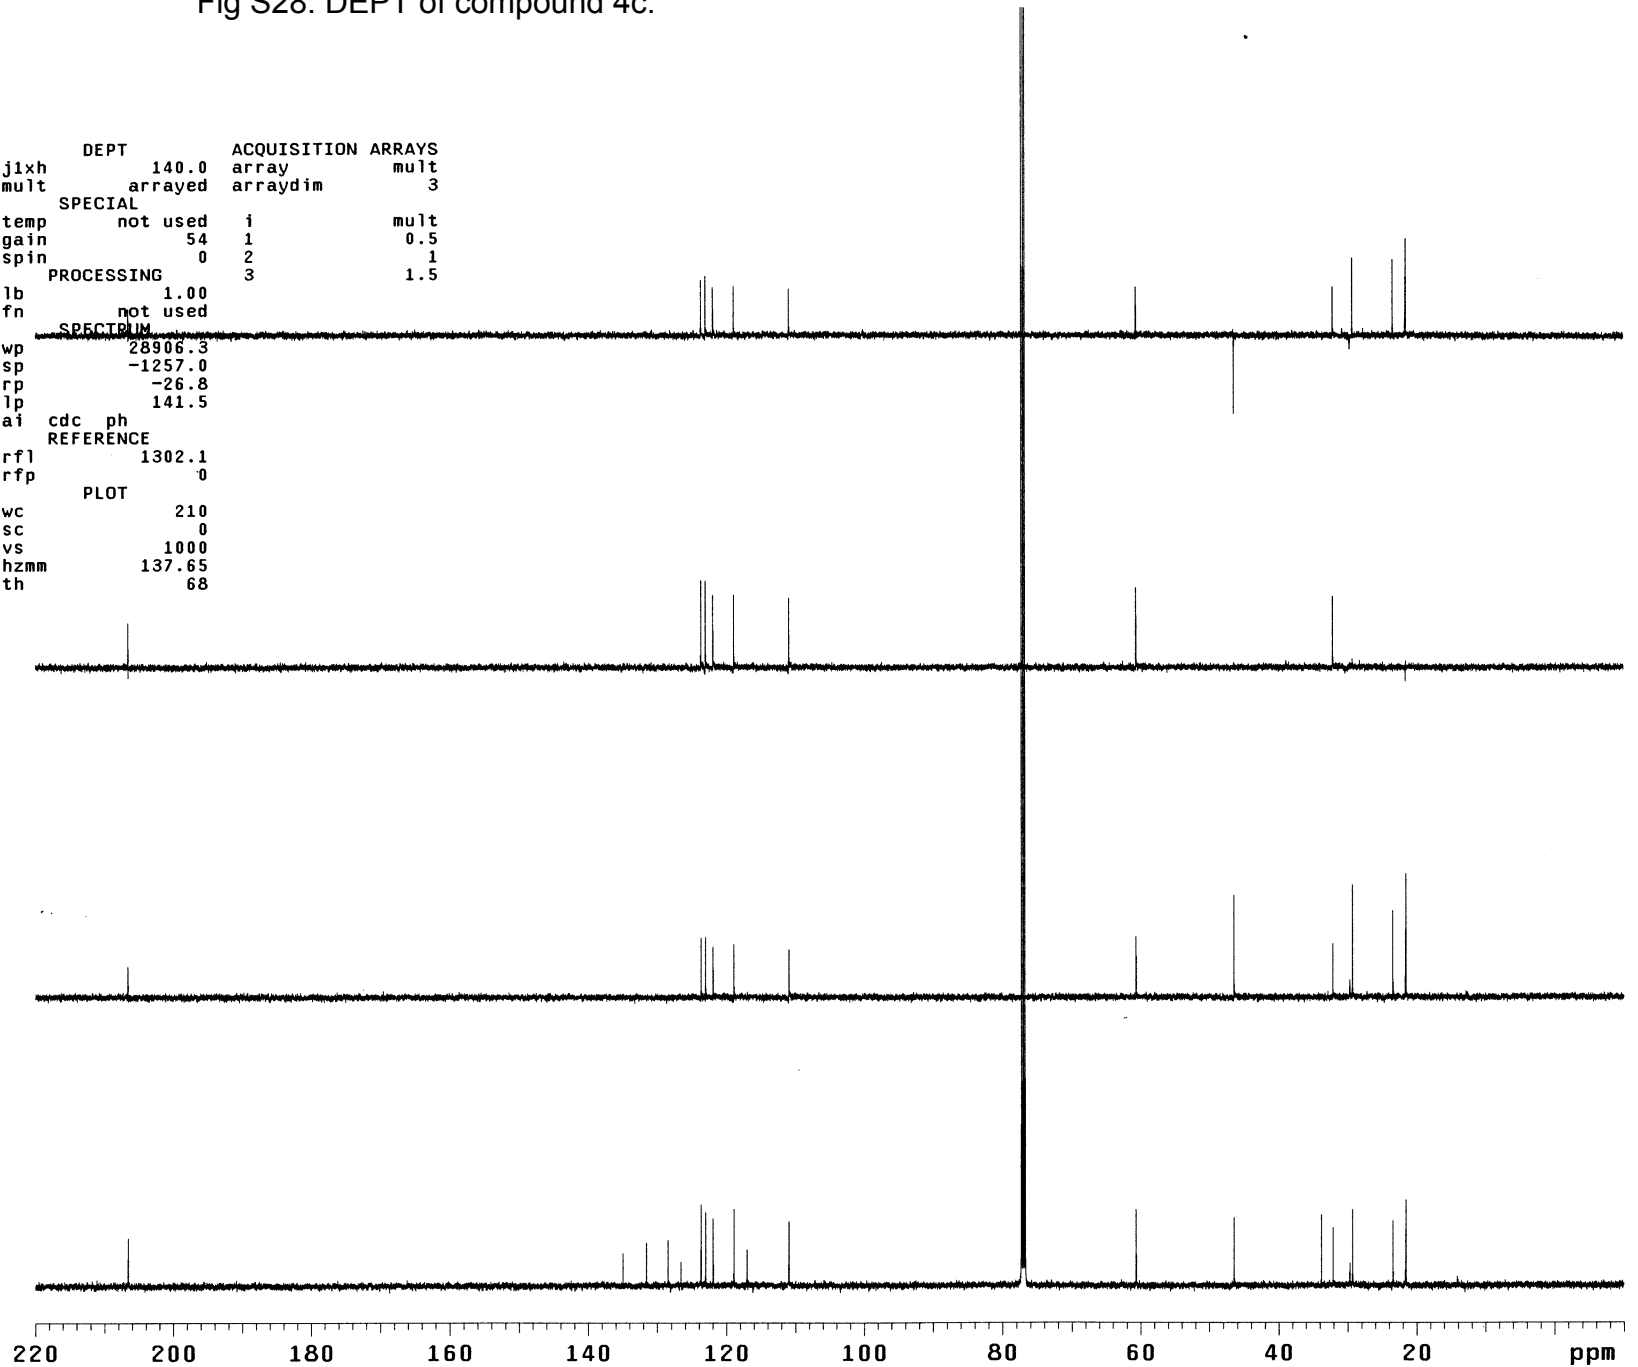

Fig S29. HSQC of compound 4c.

NSD-09-175-F1

exp98 gHSQC

| SAMPLE           | FLAGS         | ACQUISITION | ARRAYS       |
|------------------|---------------|-------------|--------------|
| date Mar 21 2014 | hs            | n           | phase        |
| solvent cdc13    | sspul         | y           | arraydim 256 |
| sample undefined | PFGflg        | y           |              |
| ACQUISITION      | hsglv1        | 1009        | phase        |
| sw 6000.6        | SPECIAL       | i           | 1            |
| at 0.171         | temp          | not used    | 2            |
| np 2048          | gain          | 54          |              |
| fb not used      | spin          | 0           |              |
| ss 32            | GRADIENTS     |             |              |
| d1 1.000         | gzlv11        | 1009        |              |
| nt 8             | gt1           | 0.002000    |              |
| 2D ACQUISITION   | gzlv13        | 508         |              |
| sw1 21367.5      | gt3           | 0.001000    |              |
| ni 128           | gstab         | 0.000500    |              |
| phase arrayed    | F2 PROCESSING |             |              |
| TRANSMITTER      | gf            | 0.079       |              |
| tn H1            | gfs           | not used    |              |
| sfrq 499.833     | fn            | 2048        |              |
| tof -0.1         | F1 PROCESSING |             |              |
| tpwr 61          | gf1           | 0.006       |              |
| pw 12.900        | gfs1          | not used    |              |
| DECOUPLER        | proc1         | 1p          |              |
| dn C13           | fn1           | 2048        |              |
| dof -2515.1      | DISPLAY       |             |              |
| dm nny           | sp            | 351.3       |              |
| dmm ccp          | wp            | 3539.4      |              |
| dmf 32258        | sp1           | 2318.3      |              |
| dpwr 42          | wp1           | 13667.7     |              |
| pxlv1 59         | rfl           | 3261.1      |              |
| pxw 12.200       | rfp           | 2745.1      |              |
| HSQC             | rfl1          | 16755.1     |              |
| j1xh 140.0       | rfp1          | 15463.5     |              |
| nullflg y        | PLOT          |             |              |
| mult 2           | wc            | 150.0       |              |
|                  | sc            | 6.2         |              |
|                  | wc2           | 116.2       |              |
|                  | sc2           | 0           |              |
|                  | vs            | 100         |              |
|                  | th            | 6           |              |
|                  | ai            | cdc         | ph           |

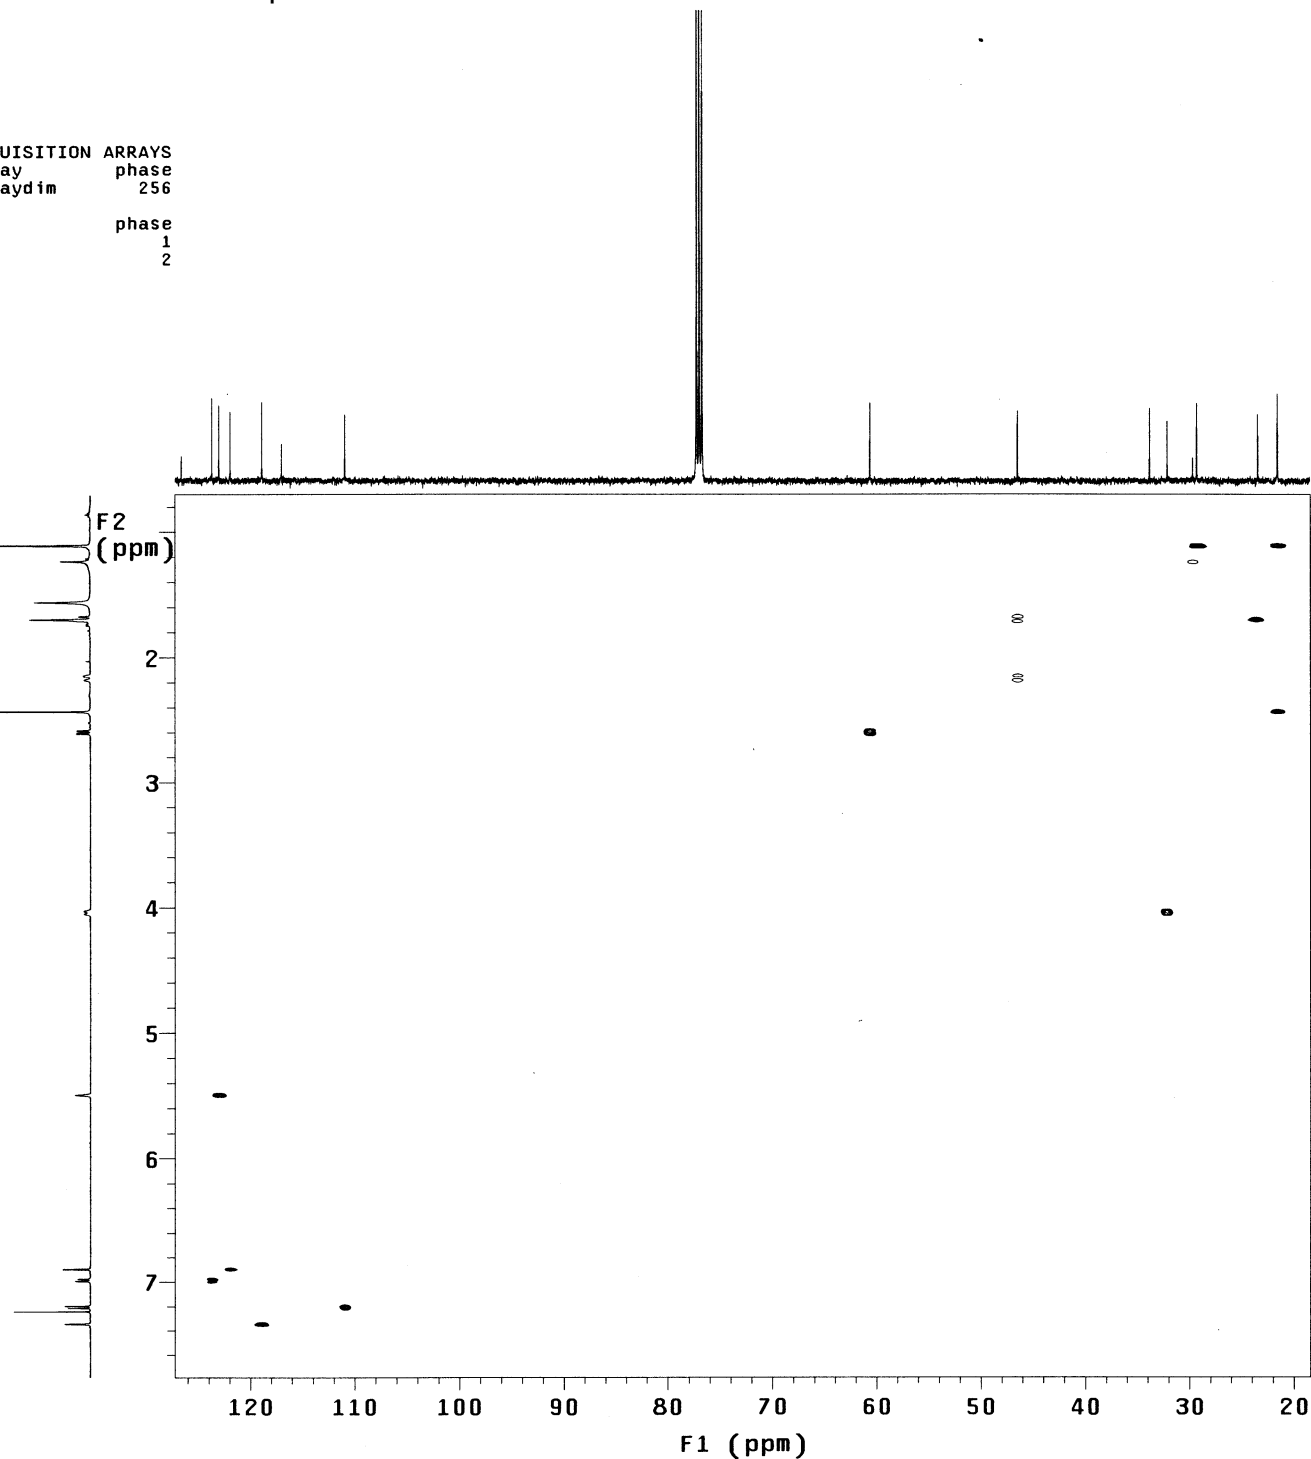

Fig S30. COSY of compound 4c.

NSD-09-175-F1

exp96 gCOSY

| SAMPLE         |             | FLAGS         |          |
|----------------|-------------|---------------|----------|
| date           | Mar 21 2014 | hs            | nn       |
| solvent        | cdc13       | sspul         | n        |
| sample         | undefined   | hsglv1        | 1009     |
| ACQUISITION    |             | SPECIAL       |          |
| sw             | 6000.6      | temp          | not used |
| at             | 0.171       | gain          | 34       |
| np             | 2048        | spin          | 0        |
| fb             | not used    | F2 PROCESSING |          |
| ss             | 16          | sb            | -0.085   |
| d1             | 1.000       | sbs           | not used |
| nt             | 8           | fn            | 2048     |
| 2D ACQUISITION |             | F1 PROCESSING |          |
| sw1            | 6000.6      | sb1           | -0.021   |
| ni             | 128         | sbs1          | not used |
| TRANSMITTER    |             | proc1         |          |
| tn             | H1          | fn1           | 2048     |
| sfrq           | 499.833     | DISPLAY       |          |
| tof            | -0.1        | sp            | 324.9    |
| tpwr           | 61          | wp            | 4629.4   |
| pw             | 12.900      | sp1           | 325.3    |
| GRADIENTS      |             | wp1           | 4629.4   |
| gzlv11         | 1009        | rfl           | 3264.0   |
| gt1            | 0.001000    | rfp           | 2745.1   |
| gstab          | 0.000500    | rfl1          | 3263.6   |
| DECOUPLER      |             | rfp1          | 2745.1   |
| dn             | C13         | PLOT          |          |
| dm             | nnn         | wc            | 155.0    |
|                |             | sc            | 10.0     |
|                |             | wc2           | 155.0    |
|                |             | sc2           | 0        |
|                |             | vs            | 100      |
|                |             | th            | 6        |
|                |             | ai            | cdc av   |

F2  
(ppm)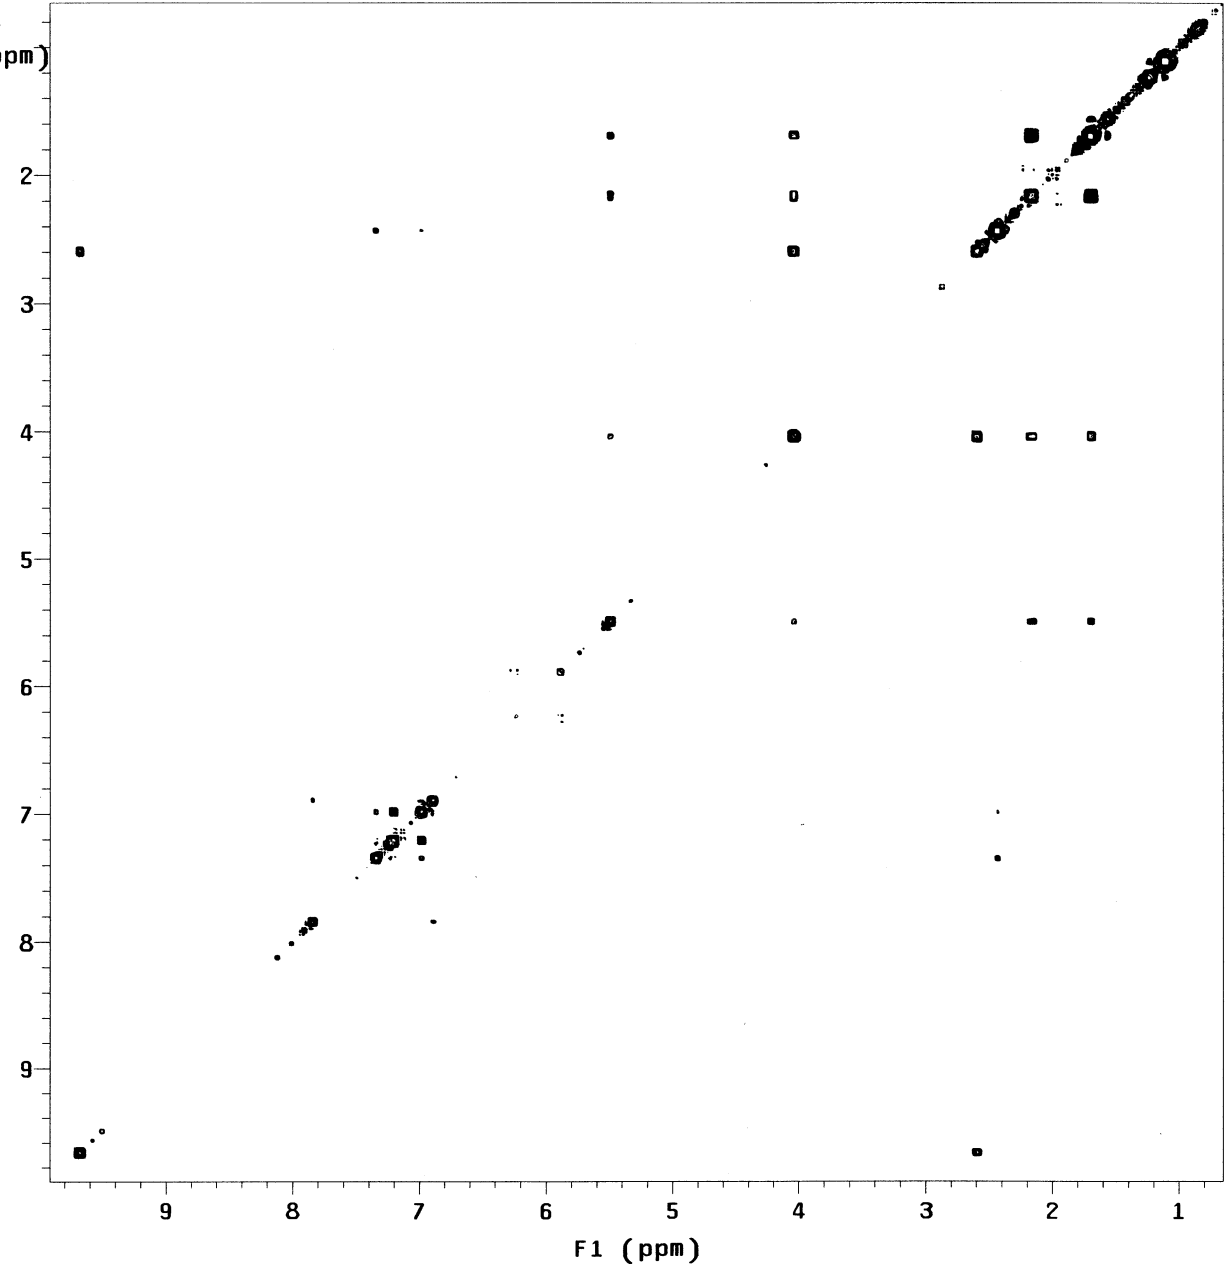

Fig S31. NOESY of compound 4c.

NSD-09-175-F1

exp97 NOESY

| SAMPLE         |             | FLAGS         | n        |
|----------------|-------------|---------------|----------|
| date           | Mar 21 2014 | hs            | y        |
| solvent        | cdc13       | sspul         | y        |
| sample         | undefined   | PFGflg        | y        |
| ACQUISITION    |             | hsglv1        | 1009     |
| sw             | 6000.6      | SPECIAL       |          |
| at             | 0.171       | temp          | not used |
| np             | 2048        | gain          | 34       |
| fb             | not used    | spin          | 0        |
| ss             | 32          | F2 PROCESSING |          |
| d1             | 1.000       | gf            | 0.079    |
| nt             | 16          | gfs           | not used |
| 2D ACQUISITION |             | fn            | 2048     |
| sw1            | 6000.6      | F1 PROCESSING |          |
| ni             | 200         | gf1           | 0.031    |
| TRANSMITTER    |             | gfs1          | not used |
| tn             | H1          | proc1         | lp       |
| sfrq           | 499.833     | fn1           | 2048     |
| tof            | -0.1        | DISPLAY       |          |
| tpwr           | 61          | sp            | 220.1    |
| pw             | 12.900      | wp            | 4711.4   |
| NOESY          |             | sp1           | 210.7    |
| mix            | 0.600       | wp1           | 4717.3   |
| PRESATURATION  |             | rfl           | 3263.3   |
| satmode        | nnnn        | rfp           | 2745.1   |
| satpwr         | 0           | rfl1          | 3261.0   |
| satdly         | 0           | rfp1          | 2745.1   |
| satfrq         | 0           | PLOT          |          |
| DECOUPLER      |             | wc            | 155.0    |
| dn             | C13         | sc            | 10.0     |
| dm             | nnn         | wc2           | 155.0    |
|                |             | sc2           | 0        |
|                |             | vs            | 100      |
|                |             | th            | 1        |
|                |             | ai            | ph       |

F2 (ppm)

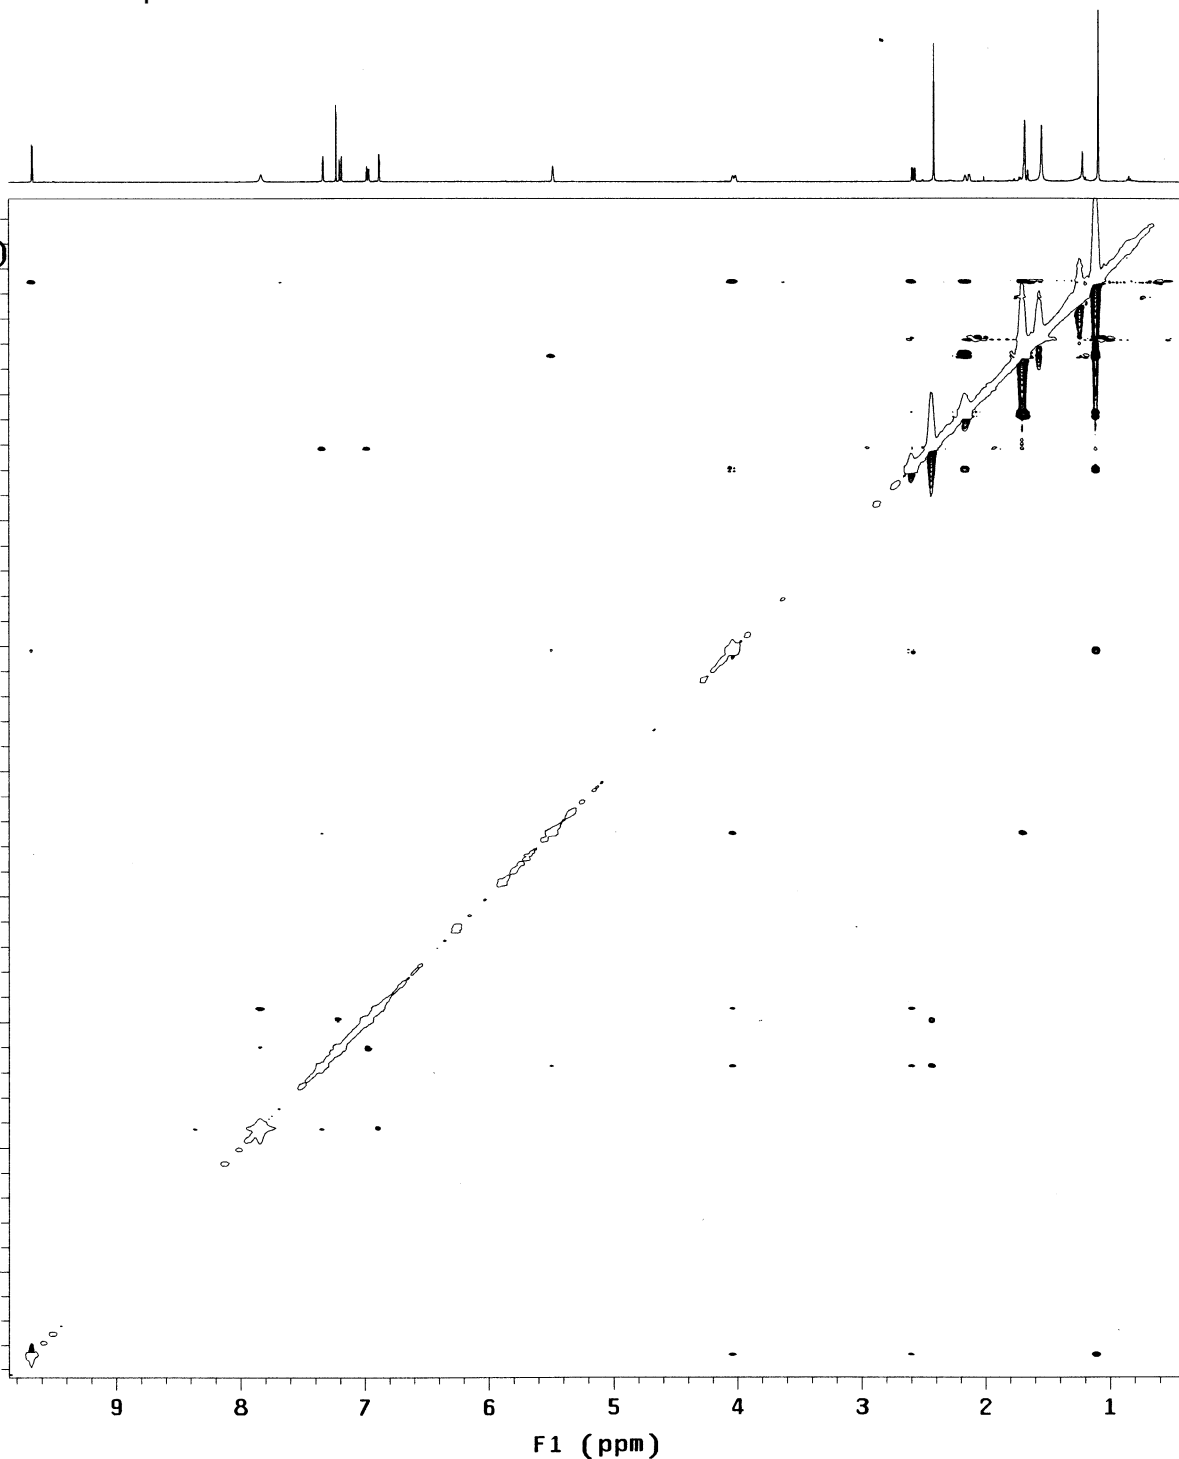

Fig S32. 1H NMR (CDCl3, 500 MHz) of compound 4d.

NSD-09-186-f1

exp60 s2pu1

|             |             |            |          |
|-------------|-------------|------------|----------|
| SAMPLE      |             | DEC. & VT  |          |
| date        | Mar 27 2014 | dfrq       | 125.694  |
| solvent     | cdcl3       | dn         | C13      |
| file        | exp         | dpwr       | 30       |
| ACQUISITION |             | dof        | 0        |
| sfrq        | 499.833     | dm         | nnn      |
| tn          | H1          | dmm        | c        |
| at          | 3.000       | dmf        | 200      |
| np          | 48000       | dseq       |          |
| sw          | 8000.0      | dres       | 1.0      |
| fb          | not used    | homo       | n        |
| bs          | 4           | PROCESSING |          |
| tpwr        | 61          | wtfile     |          |
| pw          | 4.8         | proc       | ft       |
| d1          | 1.000       | fn         | not used |
| tof         | 499.7       | math       | f        |
| nt          | 4           |            |          |
| ct          | 4           | werr       | react    |
| alock       | y           | wexp       | procplot |
| gain        | not used    | wbs        |          |
| FLAGS       |             | wnt        | wft      |
| il          | n           |            |          |
| in          | n           |            |          |
| dp          | y           |            |          |
| hs          | nn          |            |          |
| DISPLAY     |             |            |          |
| sp          | -250.1      |            |          |
| wp          | 5748.0      |            |          |
| vs          | 150         |            |          |
| sc          | 0           |            |          |
| wc          | 210         |            |          |
| hzmm        | 27.37       |            |          |
| is          | 33.57       |            |          |
| rfl         | 4635.7      |            |          |
| rfp         | 3618.8      |            |          |
| th          | 3           |            |          |
| ins         | 100.000     |            |          |
| nm          | cdc ph      |            |          |

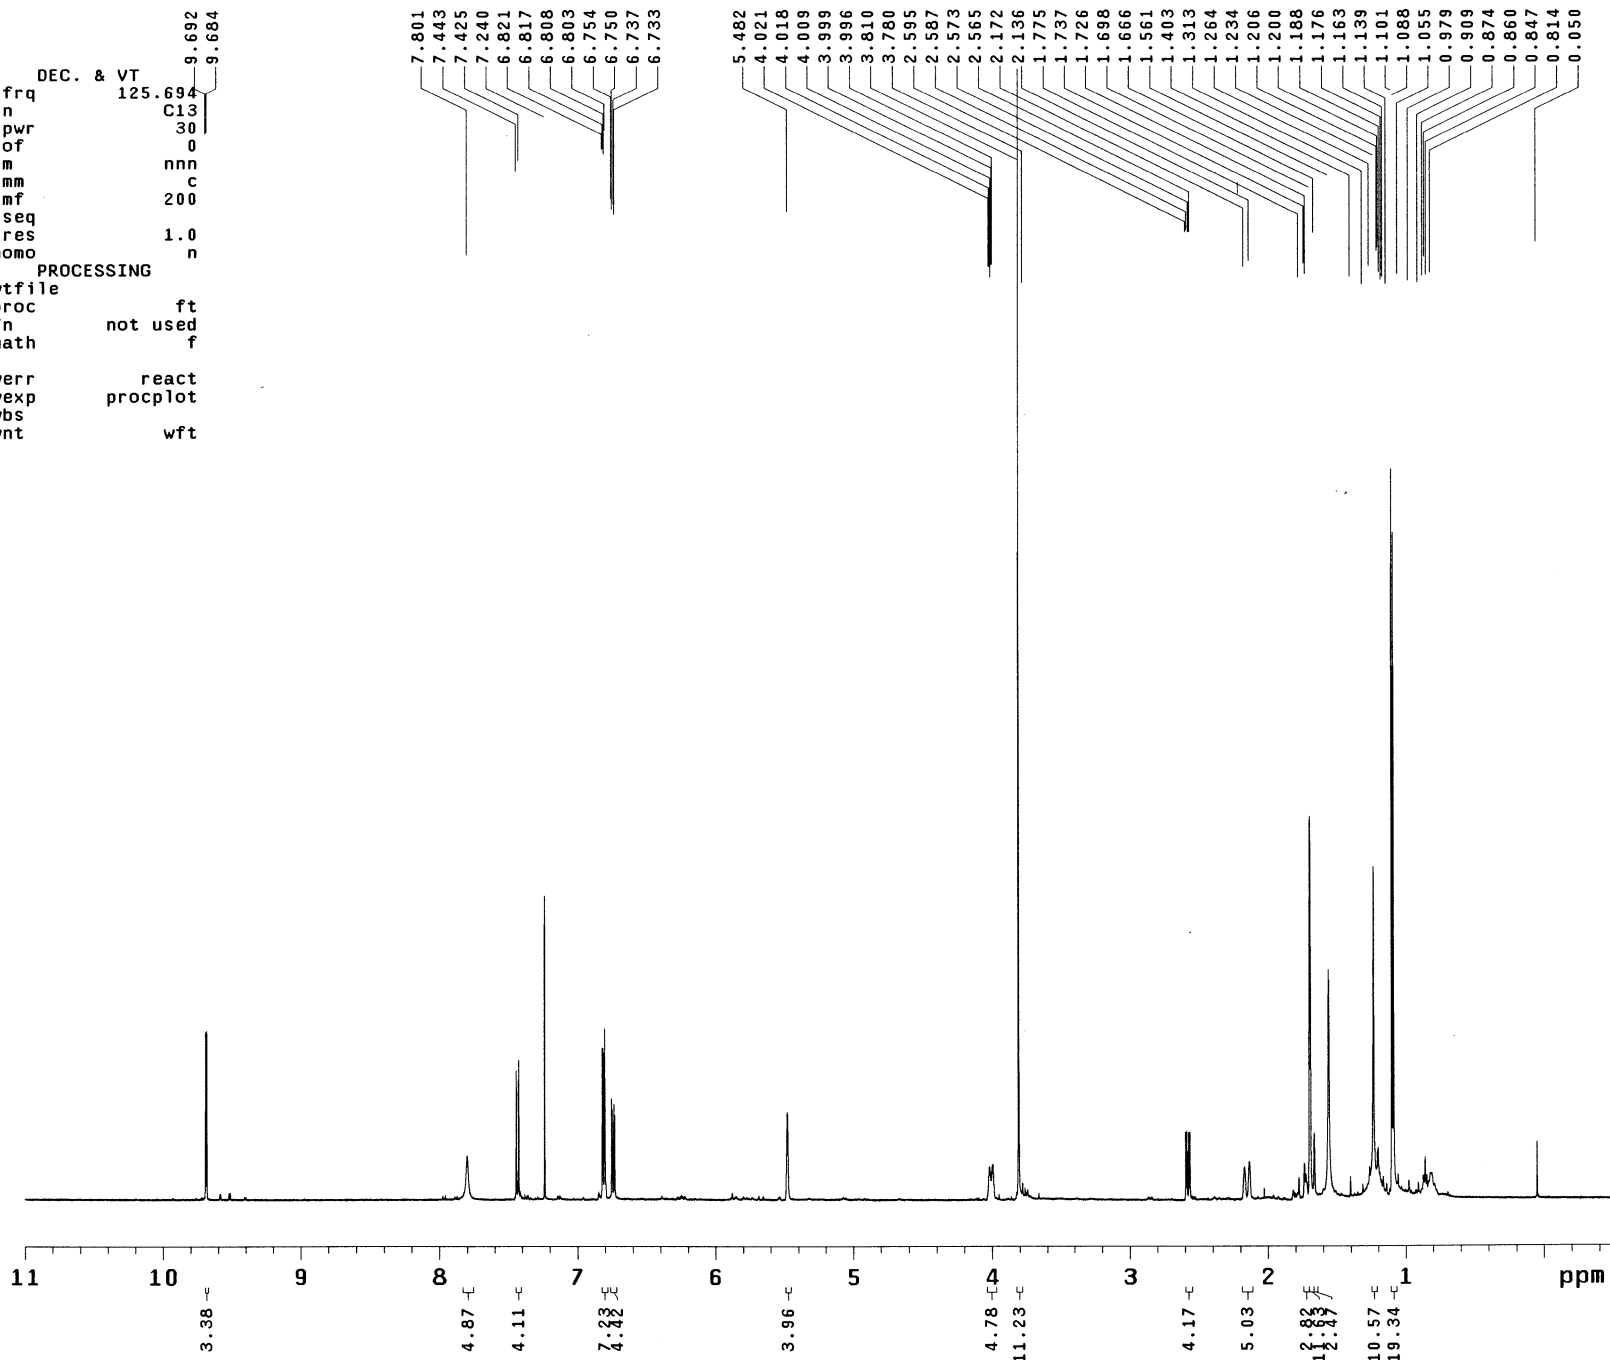



```

NSD-09-186-f1
exp61 s2pu1
SAMPLE DEC. & VT
date Mar 27 2014 dfrq 499.833
solvent cdc13 dn H1
file exp dpwr 44
ACQUISITION dof 0
sfrq 125.697 dm yyy
tn C13 dmm w
at 1.000 dmf 10870
np 62894 dseq
sw 31446.5 dres 1.0
fb not used homo n
bs 16 PROCESSING
ss 2 lb 1.00
tpwr 60 wtfile
pw 4.0 proc ft
d1 1.000 fn not used
tof 2512.2 math f
nt 6000
ct 6000 werr react
alock y wexp procplot
gain not used wbs testsn
FLAGS wnt
il n
in n
dp y
hs nn
DISPLAY
sp -1257.0
wp 28906.3
vs 1000
sc 0
wc 210
hzmm 137.65
is 500.00
rfl 10979.6
rfp 9677.5
th 6
ins 100.000
nm cdc ph

```

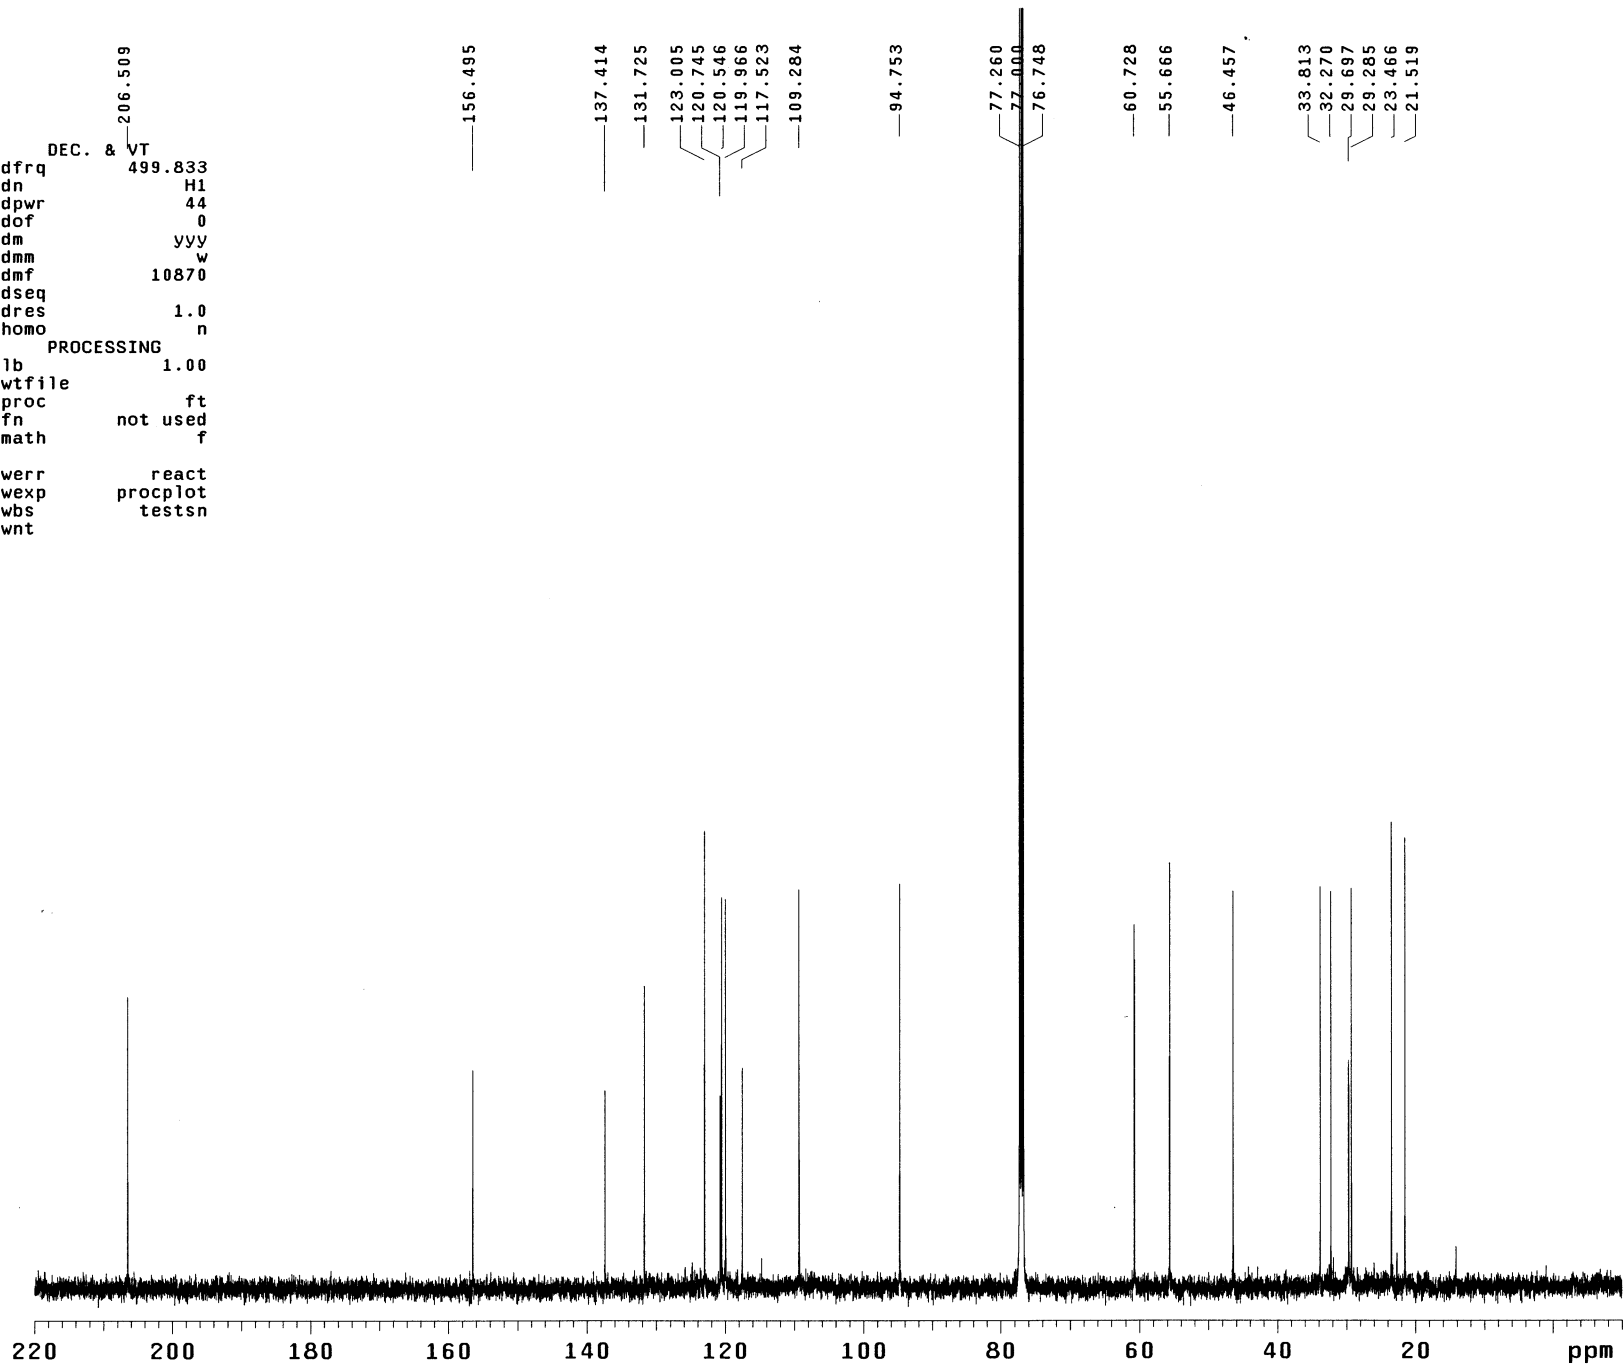Fig S33. <sup>13</sup>C NMR (CDCl<sub>3</sub>, 125 MHz) of compound 4d.

Fig S34. DEPT of compound 4d.

NSD-09-186-f1

exp62 DEPT

| SAMPLE      |             | DEPT       | ACQUISITION ARRAYS |          |
|-------------|-------------|------------|--------------------|----------|
| date        | Mar 27 2014 | j1xh       | 140.0              | array    |
| solvent     | cdcl3       | mult       | arrayed            | mult     |
| sample      | undefined   |            | arraydim           | 3        |
| ACQUISITION |             | SPECIAL    | temp               | not used |
| sw          | 31446.5     | gain       | 34                 | 1        |
| at          | 1.000       | spin       | 0                  | 2        |
| np          | 62894       | PROCESSING | 3                  | 3        |
| bs          | 16          | lb         | 1.00               | 1.5      |
| ss          | -4          | fn         | not used           |          |
| d1          | 1.000       | SPECTRUM   |                    |          |
| nt          | 3000        | wp         | 28906.3            |          |
| ct          | 3000        | sp         | -1257.0            |          |
| TRANSMITTER |             | rp         | 6.1                |          |
| tn          | C13         | lp         | 91.5               |          |
| tof         | 2512.2      | ai         | cdc ph             |          |
| tpwr        | 60          | REFERENCE  |                    |          |
| pw          | 10.400      | rfl        | 1302.1             |          |
| DECOUPLER   |             | rfp        | 0                  |          |
| dn          | H1          | PLOT       |                    |          |
| dof         | 0           | wc         | 210                |          |
| dpwr        | 44          | sc         | 0                  |          |
| dm          | nny         | vs         | 1000               |          |
| dmm         | ccw         | hzmm       | 137.65             |          |
| dmf         | 10870       | th         | 68                 |          |
| pp1v1       | 61          |            |                    |          |
| pp          | 14.600      |            |                    |          |

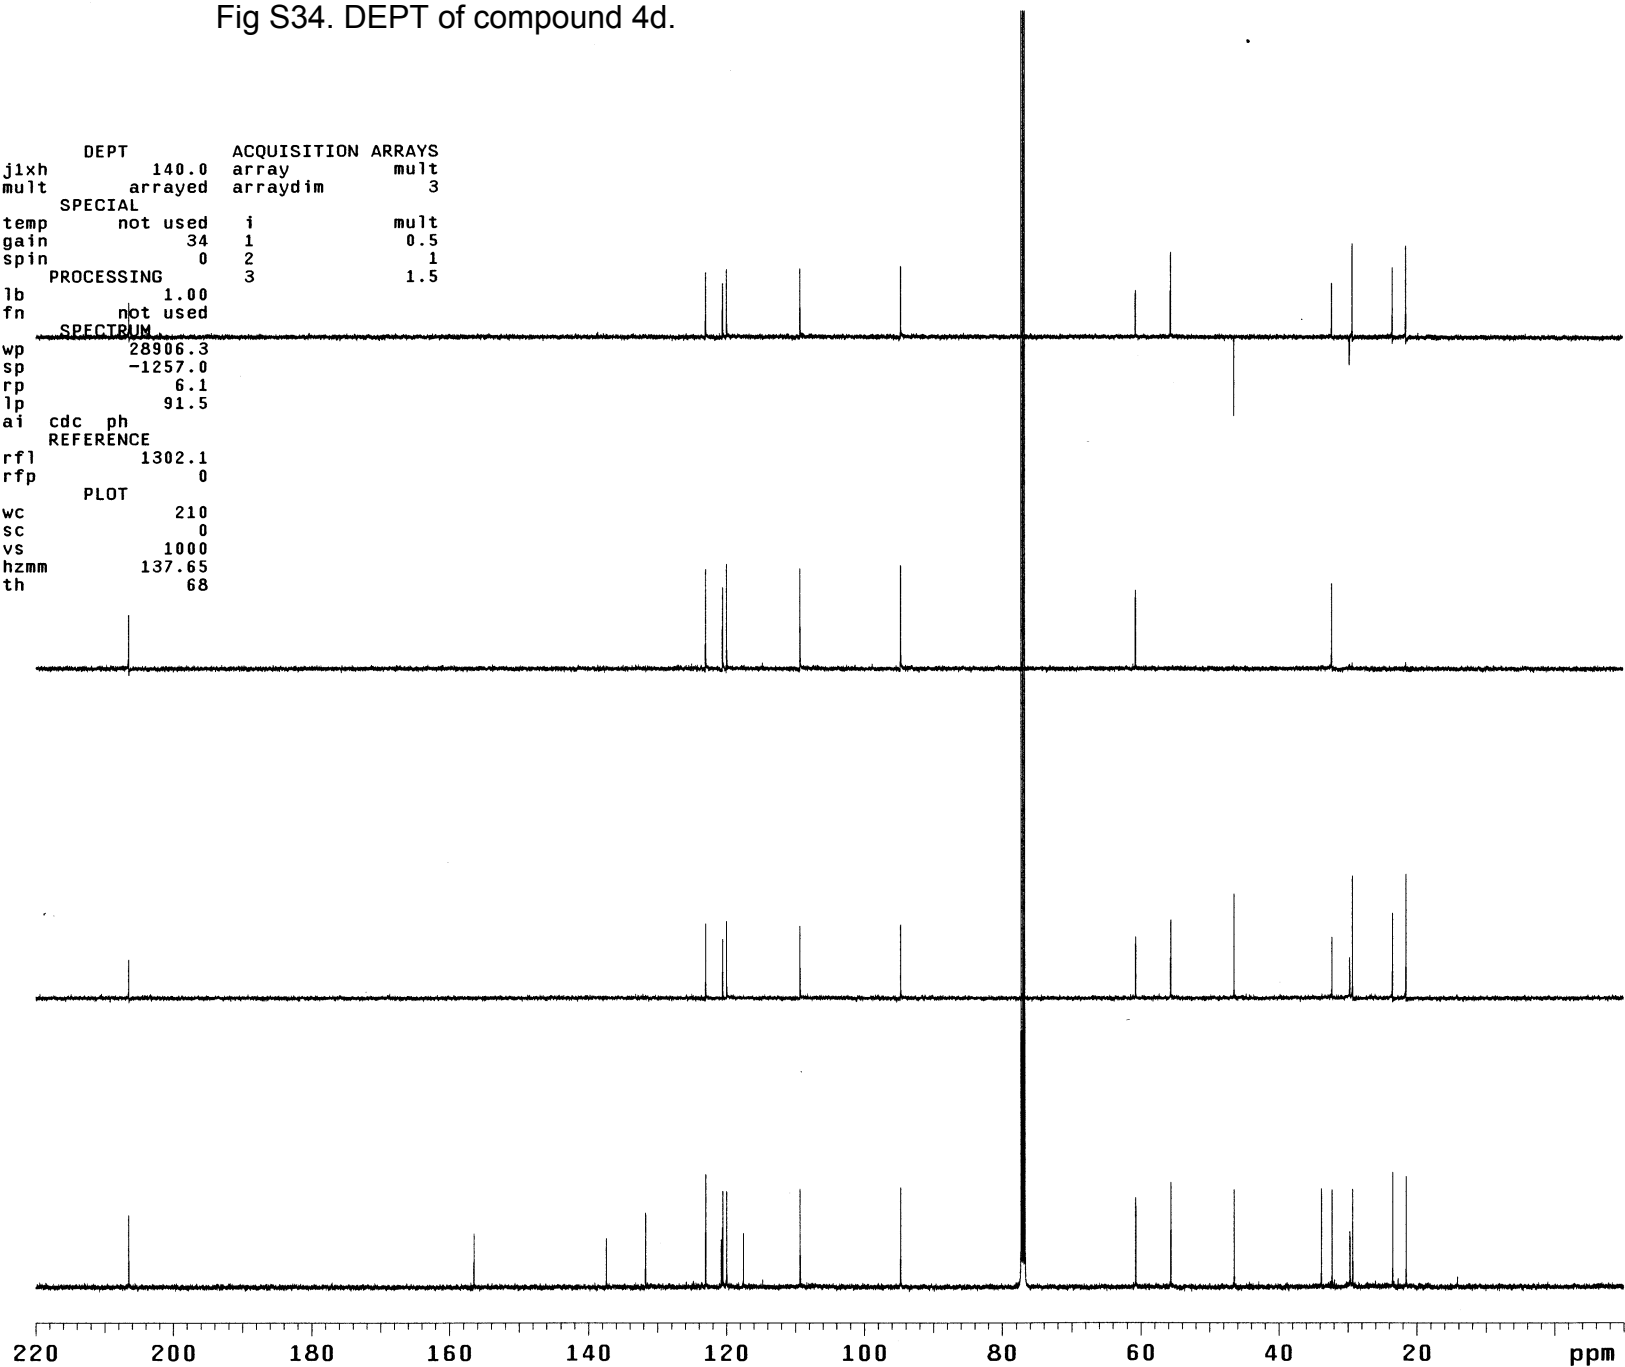

Fig S35. HSQC of compound 4d.

NSD-09-186-f1

exp65 gHSQC

| SAMPLE           | FLAGS         | ACQUISITION | ARRAYS   |
|------------------|---------------|-------------|----------|
| date Mar 27 2014 | hs            | n           | array    |
| solvent cdc13    | sspul         | y           | arraydim |
| sample undefined | PFGflg        | y           | phase    |
| ACQUISITION      | hsglv1        | 1009        | i        |
| sw 5006.3        | SPECIAL       | 1           | phase    |
| at 0.205         | temp          | not used    | 2        |
| np 2048          | gain          | 54          |          |
| fb not used      | spin          | 0           |          |
| ss 32            | GRADIENTS     |             |          |
| d1 1.000         | gzlv11        | 1009        |          |
| nt 8             | gt1           | 0.002000    |          |
| 2D ACQUISITION   | gzlv13        | 508         |          |
| sw1 21367.5      | gt3           | 0.001000    |          |
| n1 128           | gstab         | 0.000500    |          |
| phase arrayed    | F2 PROCESSING |             |          |
| TRANSMITTER      | gf            | 0.094       |          |
| tn H1            | gfs           | not used    |          |
| sfrq 499.833     | fn            | 2048        |          |
| tof -0.1         | F1 PROCESSING |             |          |
| tpwr 61          | gf1           | 0.006       |          |
| pw 12.900        | gfs1          | not used    |          |
| DECOUPLER        | procl         | 1p          |          |
| dn C13           | fn1           | 2048        |          |
| dof -2515.1      | DISPLAY       |             |          |
| dm nny           | sp            | 403.6       |          |
| dmm ccp          | wp            | 3441.8      |          |
| dmf 32258        | sp1           | 2429.9      |          |
| dpwr 42          | wp1           | 13292.1     |          |
| pwxlvl 59        | rfl           | 2756.9      |          |
| pw 12.200        | rfp           | 2740.1      |          |
| HSQC             | rfl1          | 16743.9     |          |
| j1xh 140.0       | rfl1          | 15459.6     |          |
| nullflg y        | PLOT          |             |          |
| mult 2           | wc            | 150.0       |          |
|                  | sc            | 6.2         |          |
|                  | wc2           | 116.2       |          |
|                  | sc2           | 0           |          |
|                  | vs            | 331         |          |
|                  | th            | 5           |          |
|                  | ai            | cdc         | ph       |

F2  
(ppm)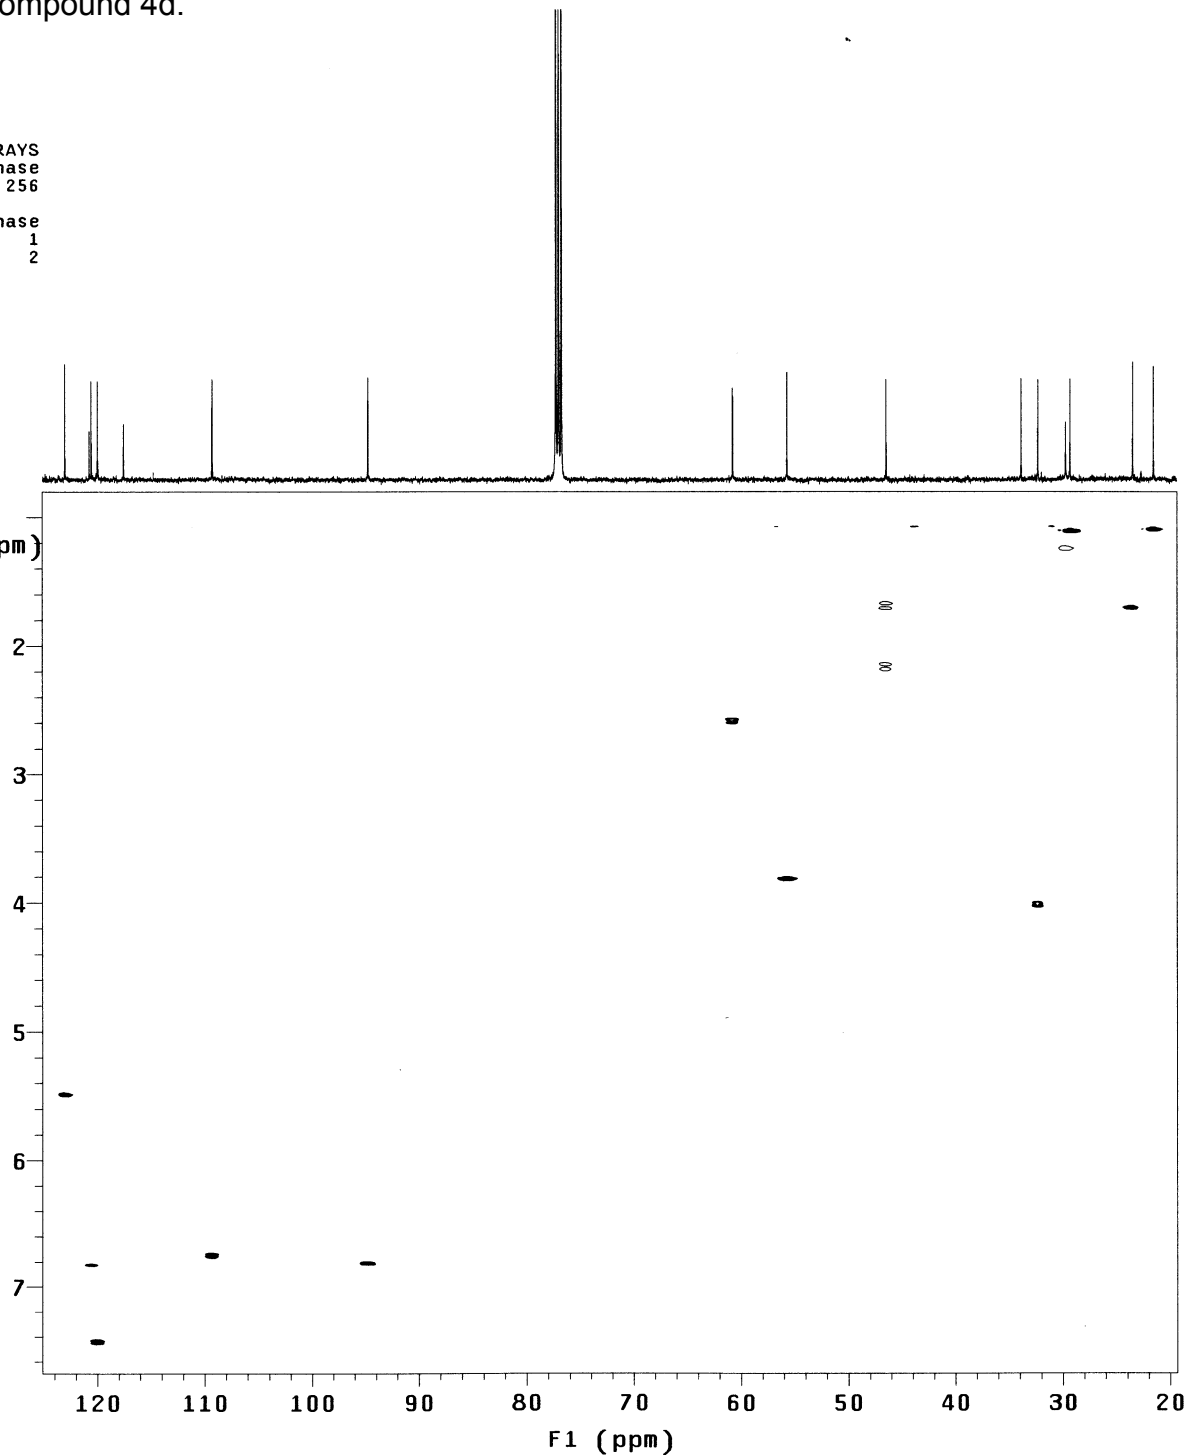

Fig S36. COSY of compound 4d.

NSD-09-186-f1

exp63 gCOSY

|                |             |               |          |
|----------------|-------------|---------------|----------|
| SAMPLE         |             | FLAGS         |          |
| date           | Mar 27 2014 | hs            | nn       |
| solvent        | cdc13       | sspul         | n        |
| sample         | undefined   | hsglv1        | 1009     |
| ACQUISITION    |             | SPECIAL       |          |
| sw             | 5006.3      | temp          | not used |
| at             | 0.205       | gain          | 34       |
| np             | 2048        | spin          | n        |
| fb             | not used    | F2 PROCESSING |          |
| ss             | 16          | sb            | -0.102   |
| d1             | 1.000       | sbs           | not used |
| nt             | 8           | fn            | 2048     |
| 2D ACQUISITION |             | F1 PROCESSING |          |
| sw1            | 5006.3      | sb1           | -0.026   |
| ni             | 128         | sbs1          | not used |
| TRANSMITTER    |             | proc1         |          |
| tn             | H1          | fn1           | 2048     |
| sfrq           | 499.833     | DISPLAY       |          |
| tof            | -0.1        | sp            | 210.0    |
| tpwr           | 61          | wp            | 4717.8   |
| pw             | 12.900      | sp1           | 205.6    |
| GRADIENTS      |             | wp1           | 4722.7   |
| gzlv11         | 1009        | rfl           | 2759.8   |
| gt1            | 0.001000    | rfp           | 2740.1   |
| gstab          | 0.000500    | rfl1          | 2759.3   |
| DECOUPLER      |             | rfp1          | 2740.1   |
| dn             | C13         | PLOT          |          |
| dm             | nnn         | wc            | 155.0    |
|                |             | sc            | 10.0     |
|                |             | wc2           | 155.0    |
|                |             | sc2           | 0        |
|                |             | vs            | 331      |
|                |             | th            | 6        |
|                |             | ai            | cdc av   |

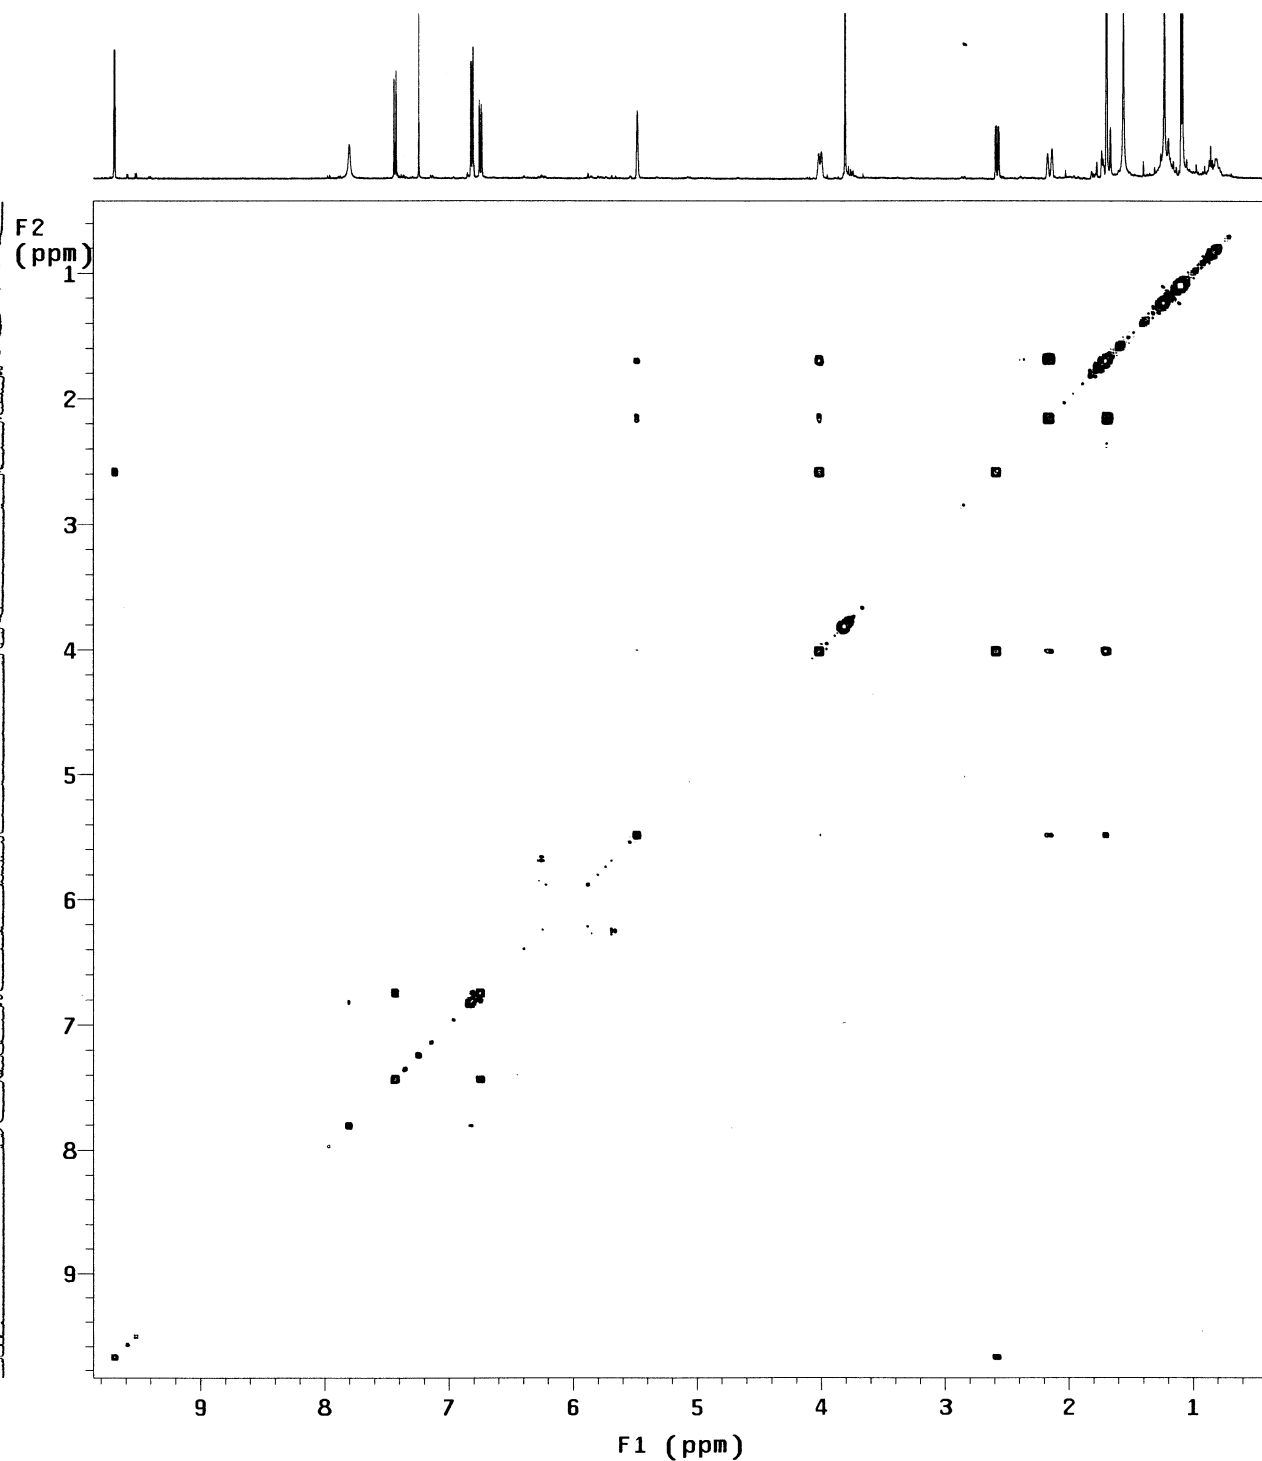

Fig S37. NOESY of compound 4d.

NSD-09-186-f1

exp64 NOESY

|                |             |               |          |
|----------------|-------------|---------------|----------|
| SAMPLE         |             | FLAGS         |          |
| date           | Mar 27 2014 | hs            | n        |
| solvent        | cdcl3       | sspul         | y        |
| sample         | undefined   | PFGflg        | y        |
| ACQUISITION    |             | hsglv         | 1009     |
| sw             | 5006.3      | SPECIAL       |          |
| at             | 0.205       | temp          | not used |
| np             | 2048        | gain          | 34       |
| fb             | not used    | spin          | 0        |
| ss             | 32          | F2 PROCESSING |          |
| d1             | 1.000       | gf            | 0.094    |
| nt             | 16          | gfs           | not used |
| 2D ACQUISITION |             | fn            | 2048     |
| sw1            | 5006.3      | F1 PROCESSING |          |
| ni             | 200         | gf1           | 0.037    |
| TRANSMITTER    |             | gfs1          | not used |
| tn             | H1          | procl         | lp       |
| sfrq           | 499.833     | fn1           | 2048     |
| tof            | -0.1        | DISPLAY       |          |
| tpwr           | 61          | sp            | 263.7    |
| pw             | 12.900      | wp            | 4649.4   |
| NOESY          |             | sp1           | 259.3    |
| mix            | 0.600       | wp1           | 4649.4   |
| PRESATURATION  |             | rfl           | 2760.0   |
| satmode        | nnnn        | rfp           | 2740.1   |
| satpwr         | 0           | rfl1          | 2759.4   |
| satdly         | 0           | rfp1          | 2740.1   |
| satfrq         | 0           | PLOT          |          |
| DECOUPLER      |             | wc            | 155.0    |
| dn             | C13         | sc            | 10.0     |
| dm             | nnn         | wc2           | 155.0    |
|                |             | sc2           | 0        |
|                |             | vs            | 331      |
|                |             | th            | 1        |
|                |             | ai            | ph       |

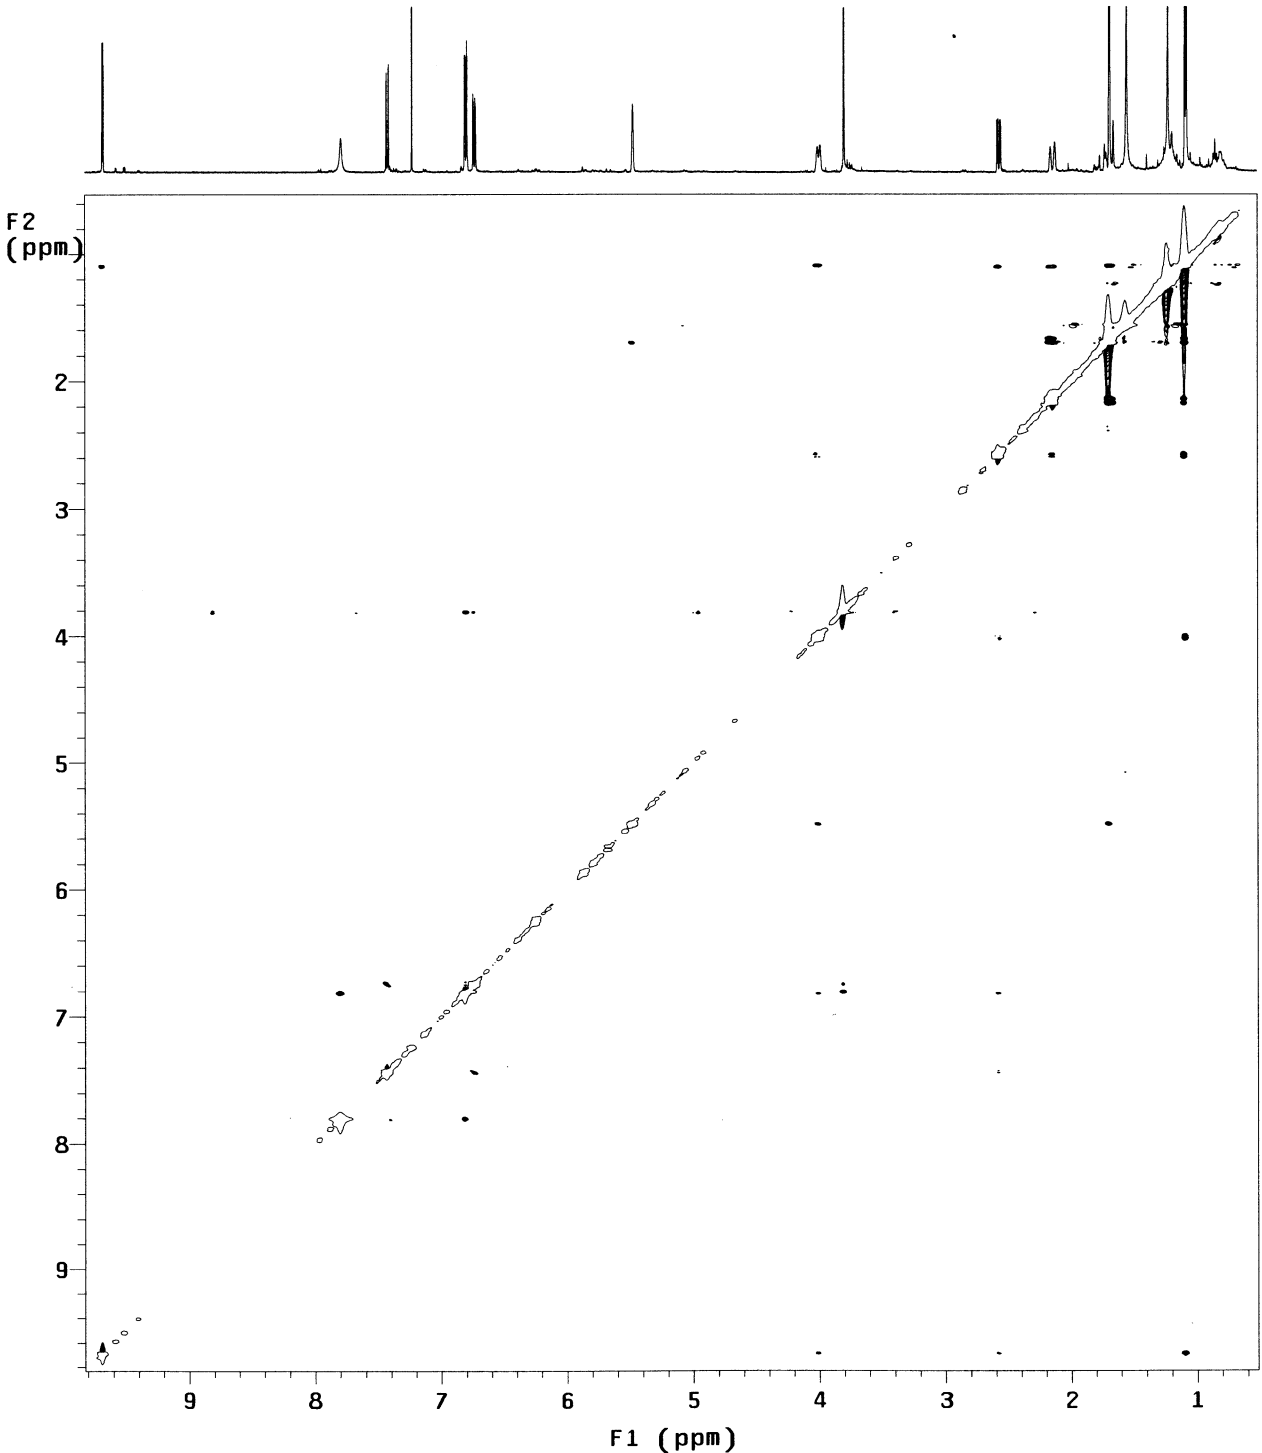

Fig S38. <sup>1</sup>H NMR (CDCl<sub>3</sub>, 500 MHz) of compound 4e.

NSD-09-184-f1

exp40 s2pu1

|             |             |       |          |
|-------------|-------------|-------|----------|
| date        | May 24 2014 | dfrq  | 125.694  |
| solvent     | cdcl3       | dn    | C13      |
| file        | exp         | dpwr  | 30       |
| ACQUISITION |             |       |          |
| sfrq        | 499.833     | dof   | 0        |
| tn          | H1          | dm    | nnn      |
| at          | 3.000       | dmm   | c        |
| np          | 48000       | dmf   | 200      |
| sw          | 8000.0      | dseq  | 1.0      |
| fb          | not used    | dres  | n        |
| bs          | 4           | homo  | n        |
| PROCESSING  |             |       |          |
| tpwr        | 61          | wfile |          |
| pw          | 4.8         | proc  | ft       |
| d1          | 1.000       | fn    | not used |
| tof         | 499.7       | math  | f        |
| nt          | 4           |       |          |
| ct          | 4           | werr  | react    |
| alock       | y           | wexp  | procplot |
| gain        | not used    | wbs   |          |
| FLAGS       |             |       |          |
| il          | n           | wnt   | wft      |
| in          | n           |       |          |
| dp          | y           |       |          |
| hs          | nn          |       |          |
| DISPLAY     |             |       |          |
| sp          | -250.1      |       |          |
| wp          | 5748.0      |       |          |
| vs          | 75          |       |          |
| sc          | 0           |       |          |
| wc          | 210         |       |          |
| hzmm        | 27.37       |       |          |
| is          | 33.57       |       |          |
| rfl         | 4636.2      |       |          |
| rfp         | 3618.8      |       |          |
| th          | 2           |       |          |
| ins         | 100.000     |       |          |
| nm          | cdc         | ph    |          |

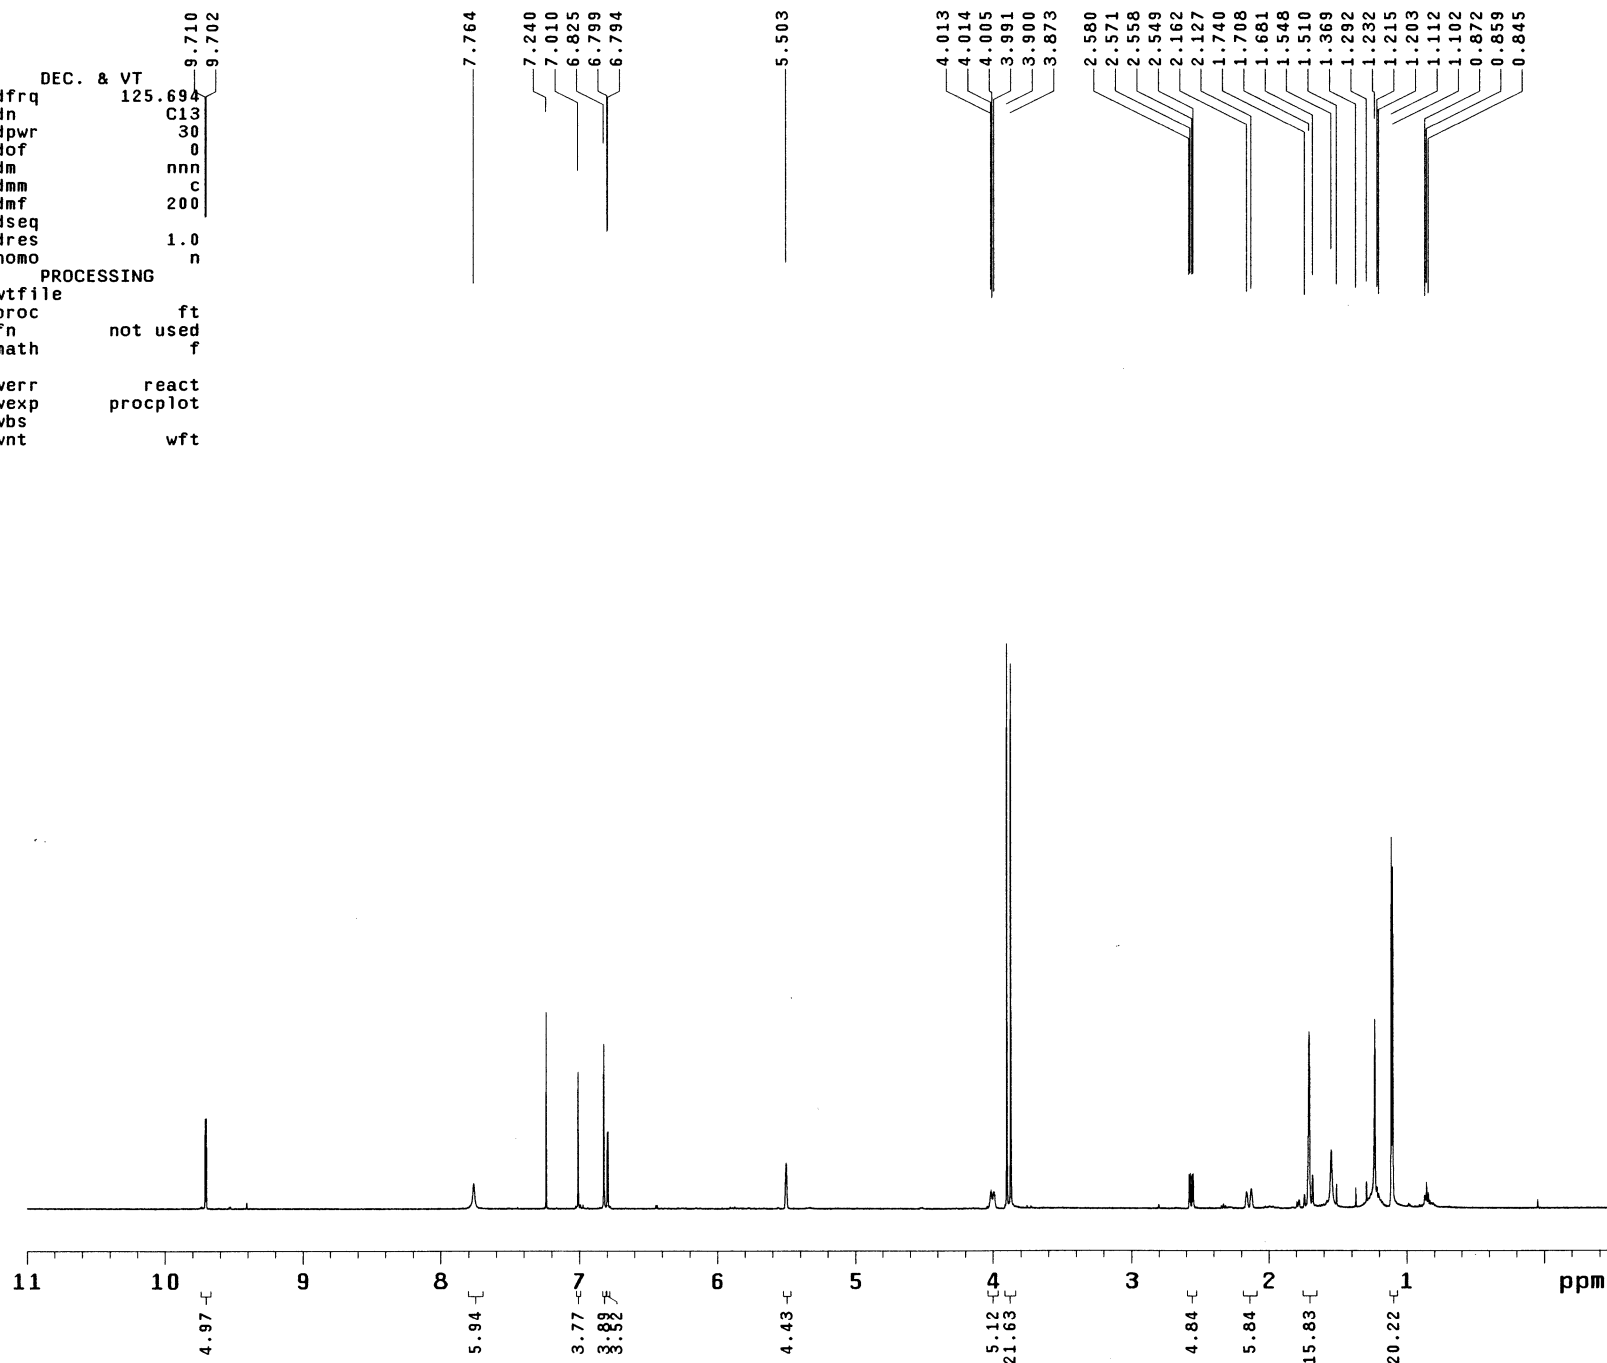

NSD-09-184-f1

exp41 s2pul

```

SAMPLE
date May 24 2014 dfrq 499.833
solvent cdc13 dn H1
file exp dpwr 44
ACQUISITION dof 0
sfrq 125.696 dm vvy
tn C13 dmm w
at 1.000 dmf 10870
np 60332 dseq
sw 30165.9 dres 1.0
fb not used homo n
bs 4
tpwr 60 lb 1.00
pw 4.8 wtfile
d1 1.000 proc ft
tof 1883.7 fn 131072
nt 6000 math f
ct 6000
alock y werr react
gain not used wexp procplot
FLAGS wbs testsn
il n wnt
in n
dp y
hs nn
DISPLAY
sp -1257.2
wp 28906.5
vs 600
sc 0
wc 210
hzmm 137.65
is 33.57
rf1 10967.9
rfp 9677.5
th 6
ins 100.000
nm cdc ph

```

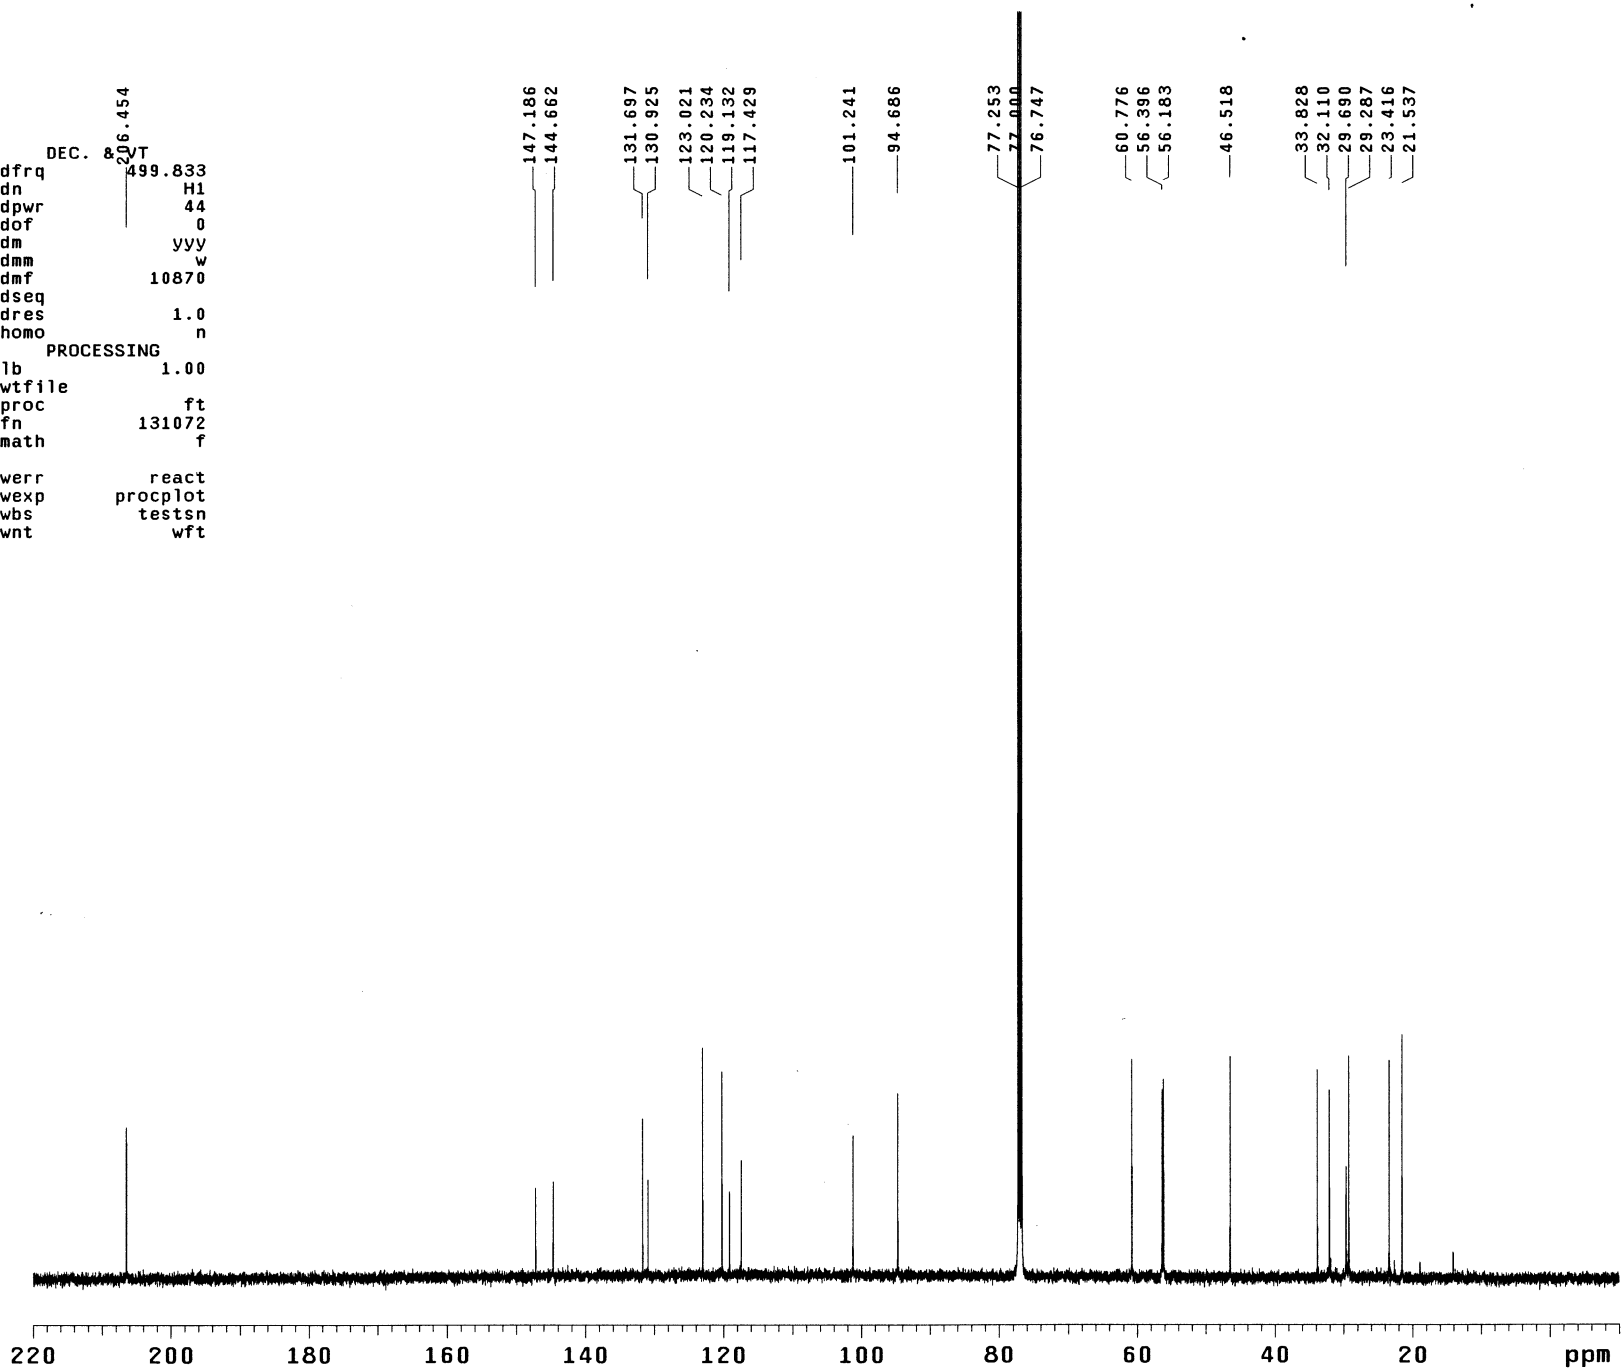Fig S39. <sup>13</sup>C NMR (CDCl<sub>3</sub>, 125 MHz) of compound 4e.

Fig S40. DEPT of compound 4e.

NSD-09-184-f1

exp42 DEPT

|             |             |            |          |       |          |      |
|-------------|-------------|------------|----------|-------|----------|------|
| date        | May 24 2014 | j1xh       | DEPT     | 140.0 | array    | mult |
| solvent     | cdcl3       | mult       | arrayed  |       | arraydim | 3    |
| sample      | undefined   | SPECIAL    |          |       |          |      |
| ACQUISITION |             | temp       | not used | i     | mult     |      |
| sw          | 30165.9     | gain       | 52       | 1     | 0.5      |      |
| at          | 1.000       | spin       | 0        | 2     | 1        |      |
| np          | 60332       | PROCESSING |          | 3     | 1.5      |      |
| bs          | 4           | lb         | 1.00     |       |          |      |
| ss          | -4          | fn         | 131072   |       |          |      |
| d1          | 1.000       | SPECTRUM   |          |       |          |      |
| nt          | 3000        | wp         | 28906.5  |       |          |      |
| ct          | 3000        | sp         | -1257.2  |       |          |      |
| TRANSMITTER |             | rp         | -72.0    |       |          |      |
| tn          | C13         | lp         | 71.5     |       |          |      |
| tof         | 1883.7      | ai         | cdc ph   |       |          |      |
| tpwr        | 60          | REFERENCE  |          |       |          |      |
| pw          | 10.400      | rfl        | 1290.4   |       |          |      |
| DECOUPLER   |             | rfp        | 0        |       |          |      |
| dn          | H1          | PLOT       |          |       |          |      |
| dof         | 0           | wc         | 210      |       |          |      |
| dpwr        | 44          | sc         | 0        |       |          |      |
| dm          | nny         | vs         | 1400     |       |          |      |
| dmm         | ccw         | hzmm       | 137.65   |       |          |      |
| dmf         | 10870       | th         | 7        |       |          |      |
| pplvl       | 61          |            |          |       |          |      |
| pp          | 14.600      |            |          |       |          |      |

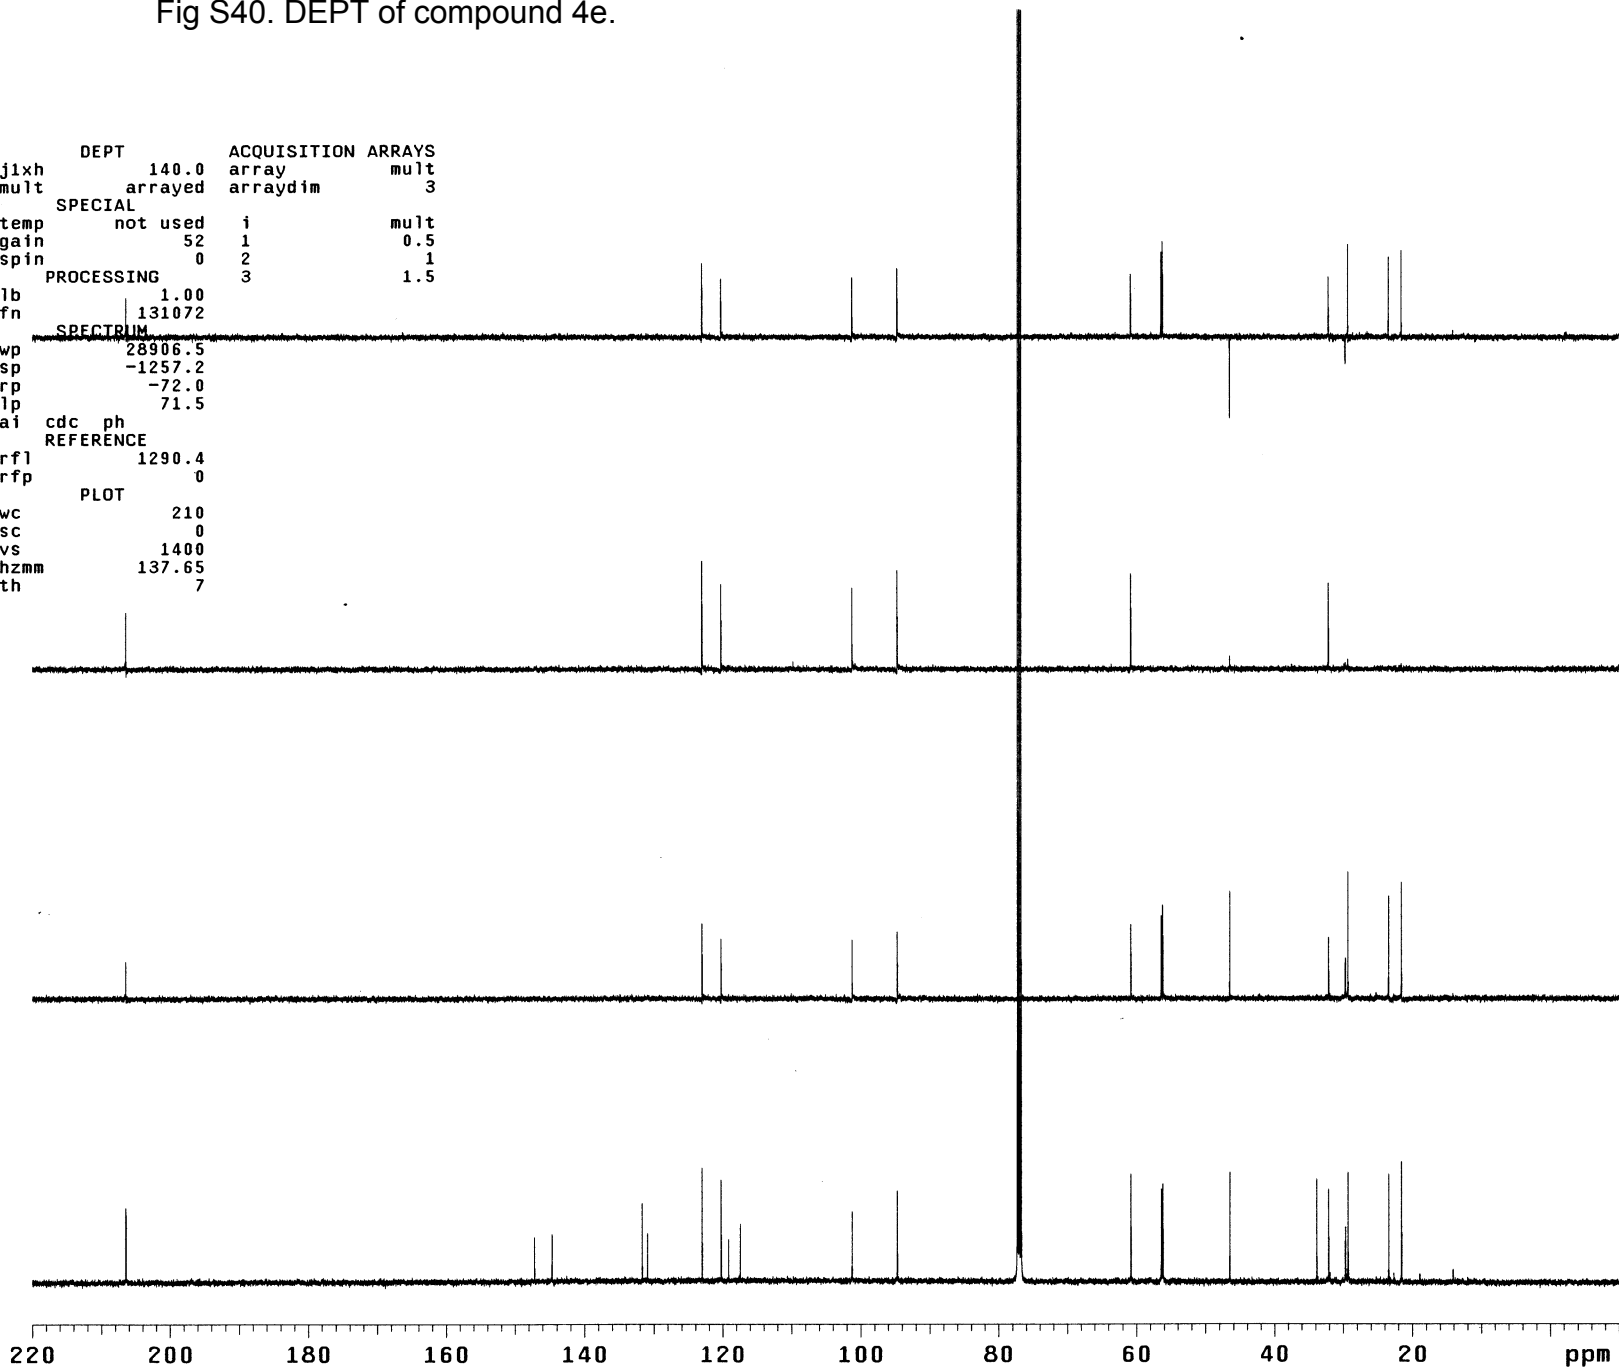



Fig S41. HMQC of compound 4e.

NSD-09-184-f1

exp45 gHMQC

| SAMPLE           | FLAGS          | ACQUISITION | ARRAYS       |
|------------------|----------------|-------------|--------------|
| date May 26 2014 | hs             | n           | array phase  |
| solvent cdc13    | sspul          | y           | arraydim 256 |
| sample undefined | PFGflg         | y           |              |
| ACQUISITION      | hsglv1         | 1009        | phase        |
| sw 5006.3        | SPECIAL        | i           | 1            |
| at 0.205         | temp not used  | 2           | 2            |
| np 2048          | gain 54        |             |              |
| fb not used      | spin 0         |             |              |
| ss 32            | GRADIENTS      |             |              |
| d1 1.000         | gzlv11 1009    |             |              |
| nt 8             | gt1 0.001000   |             |              |
| 2D ACQUISITION   | gzlv13 508     |             |              |
| sw1 21367.5      | gt3 0.001000   |             |              |
| ni 128           | gstab 0.000500 |             |              |
| phase arrayed    | F2 PROCESSING  |             |              |
| TRANSMITTER      | gf 0.094       |             |              |
| tn H1            | gfs not used   |             |              |
| sfrq 499.833     | fn 2048        |             |              |
| tof -0.1         | F1 PROCESSING  |             |              |
| tpwr 61          | gf1 0.006      |             |              |
| pw 12.900        | gfs1 not used  |             |              |
| DECOUPLER        | proc1 1p       |             |              |
| dn C13           | fn1 2048       |             |              |
| dof -2515.1      | DISPLAY        |             |              |
| dm nny           | sp 402.1       |             |              |
| dmm ccp          | wp 3275.6      |             |              |
| dmf 32258        | sp1 2317.8     |             |              |
| dpwr 42          | wp1 13542.5    |             |              |
| pxlv1 59         | rfl 2768.9     |             |              |
| pxw 12.200       | rfp 2750.6     |             |              |
| HMQC             | rfl1 16753.7   |             |              |
| j1xh 140.0       | rfp1 15461.6   |             |              |
| nullflg y        | PLOT           |             |              |
|                  | wc 150.0       |             |              |
|                  | sc 6.2         |             |              |
|                  | wc2 116.2      |             |              |
|                  | sc2 0          |             |              |
|                  | vs 214         |             |              |
|                  | th 5           |             |              |
|                  | ai cdc ph      |             |              |

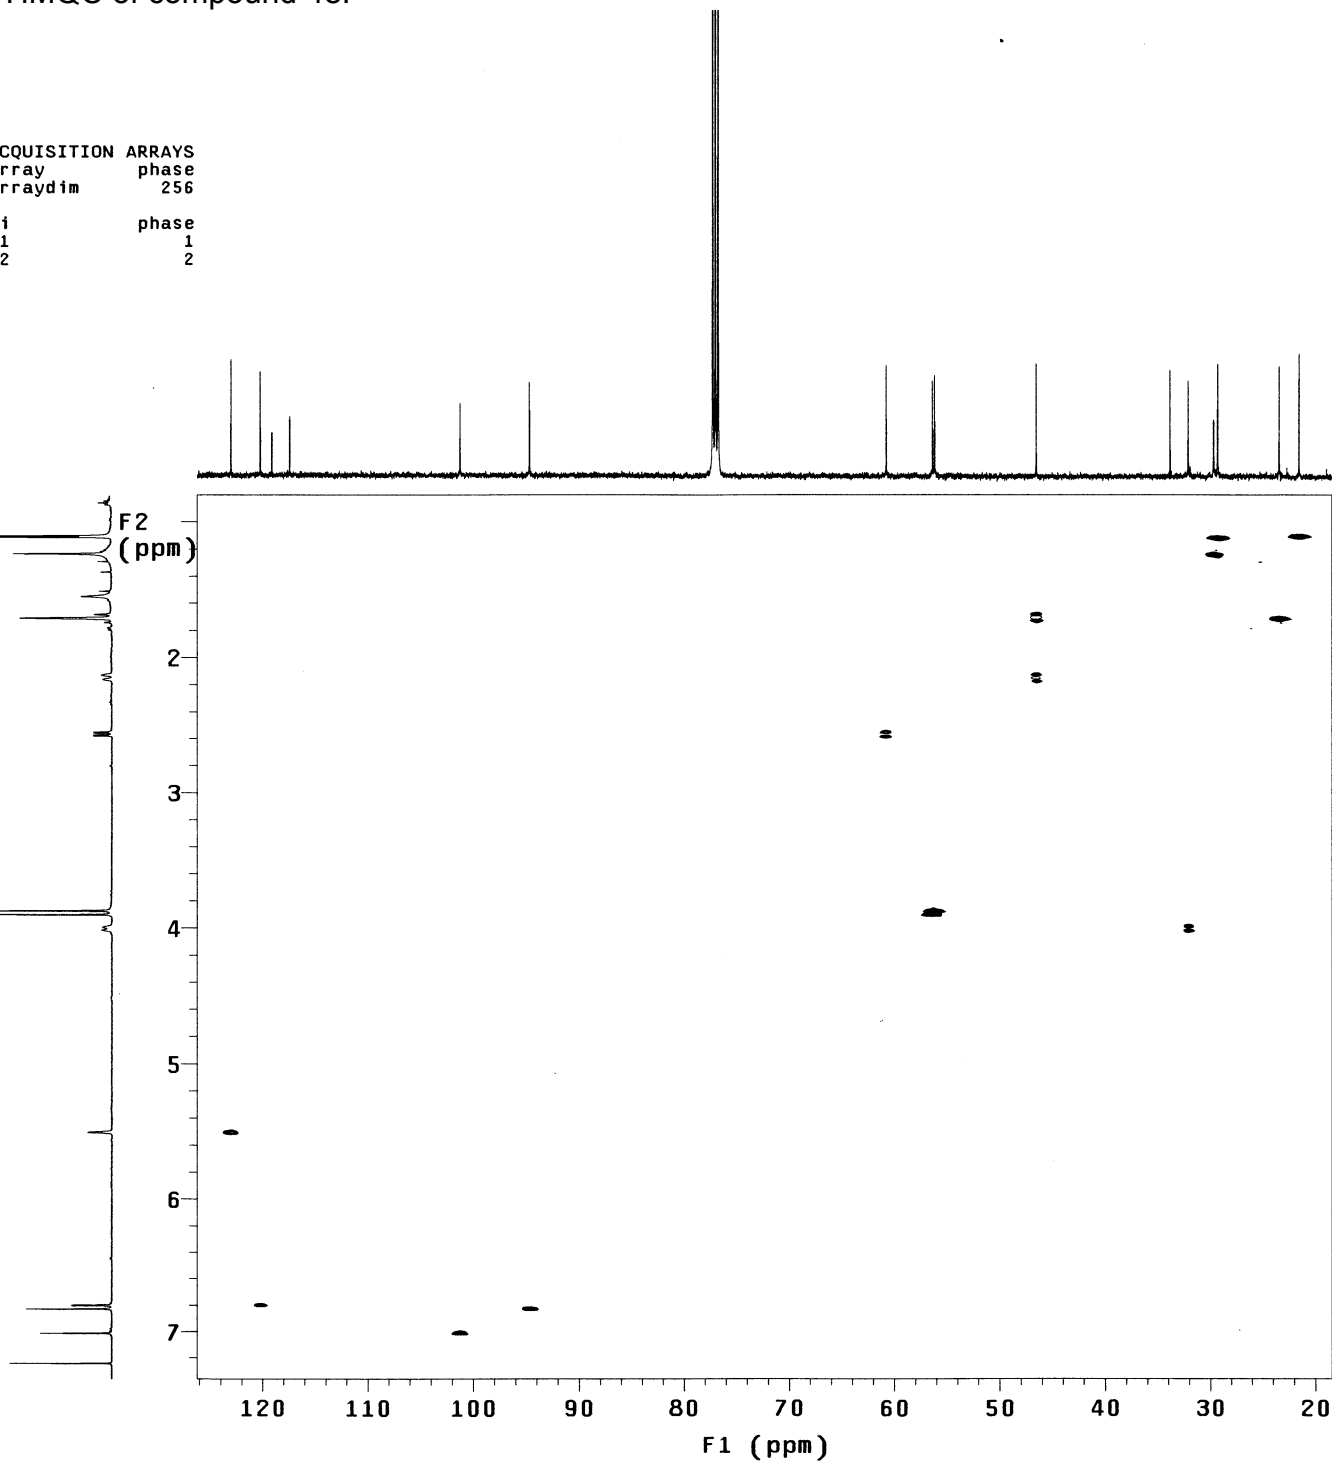

Fig S42. COSY of compound 4e.

NSD-09-184-f1

exp43 gCOSY

| SAMPLE         |             | FLAGS         |          |
|----------------|-------------|---------------|----------|
| date           | May 24 2014 | hs            | nn       |
| solvent        | cdcl3       | sspul         | n        |
| sample         | undefined   | hsglv1        | 1009     |
| ACQUISITION    |             | SPECIAL       |          |
| sw             | 5006.3      | temp          | not used |
| at             | 0.205       | gain          | 34       |
| np             | 2048        | spin          | 0        |
| fb             | not used    | F2 PROCESSING |          |
| ss             | 16          | sb            | -0.102   |
| d1             | 1.000       | sbs           | not used |
| nt             | 8           | fn            | 2048     |
| 2D ACQUISITION |             | F1 PROCESSING |          |
| sw1            | 5006.3      | sb1           | -0.026   |
| ni             | 128         | sbs1          | not used |
| TRANSMITTER    |             | proc1         |          |
| tn             | H1          | fn1           | 2048     |
| sfrq           | 499.833     | DISPLAY       |          |
| tof            | -0.1        | sp            | 299.4    |
| tpwr           | 61          | wp            | 4615.1   |
| pw             | 12.900      | sp1           | 299.4    |
| GRADIENTS      |             | wp1           | 4620.0   |
| gzlv11         | 1009        | rfl           | 2768.9   |
| gt1            | 0.001000    | rfp           | 2750.6   |
| gstab          | 0.000500    | rfl1          | 2768.9   |
|                |             | rfp1          | 2750.6   |
| DECOUPLER      |             | PLOT          |          |
| dn             | C13         | wc            | 155.0    |
| dm             | nnn         | sc            | 10.0     |
|                |             | wc2           | 155.0    |
|                |             | sc2           | 0        |
|                |             | vs            | 148      |
|                |             | th            | 6        |
|                |             | ai            | cdc av   |

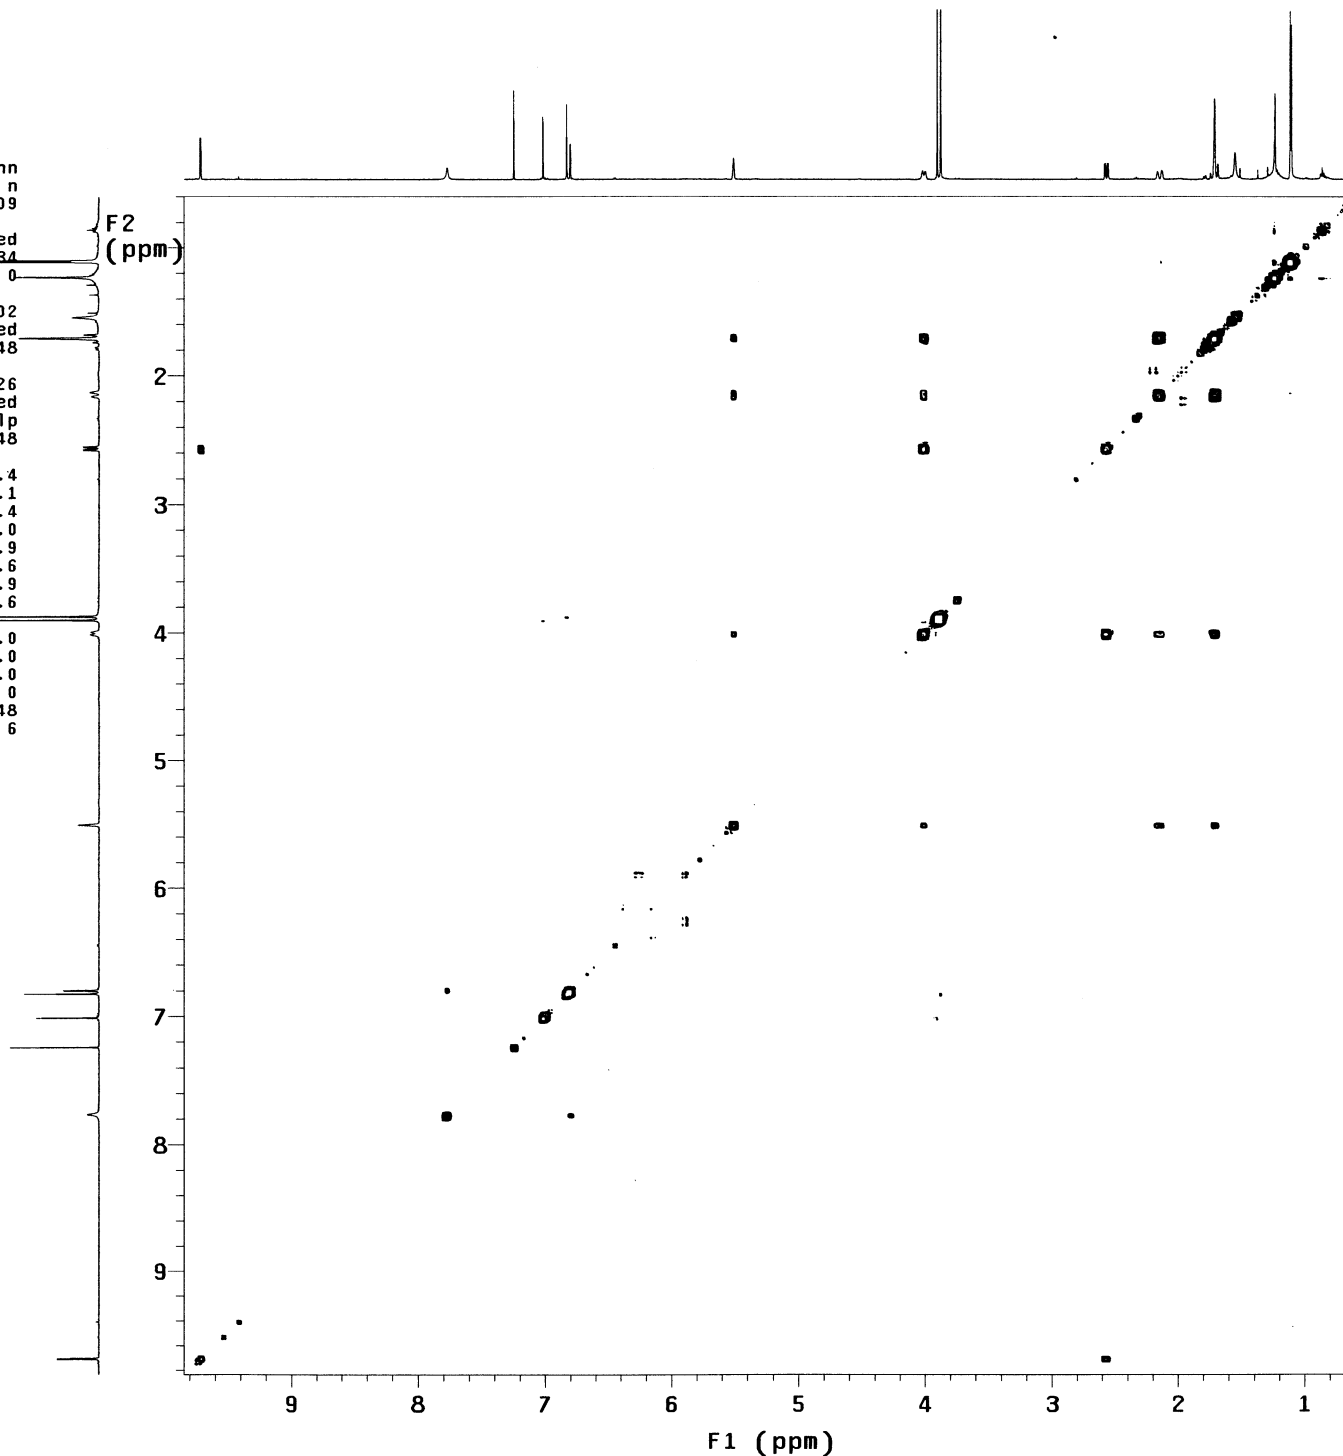

Fig S43. NOESY of compound 4e.

NSD-09-184-f1

exp44 NOESY

| SAMPLE         |             | FLAGS         |          |
|----------------|-------------|---------------|----------|
| date           | May 24 2014 | hs            | n        |
| solvent        | cdc13       | sspul         | y        |
| sample         | undefined   | PFGflg        | y        |
| ACQUISITION    |             | hsglvi        | 1009     |
| sw             | 5006.3      | SPECIAL       |          |
| at             | 0.205       | temp          | not used |
| np             | 2048        | gain          | 34       |
| fb             | not used    | spin          | 0        |
| ss             | 32          | F2 PROCESSING |          |
| d1             | 1.000       | gf            | 0.094    |
| nt             | 16          | gfs           | not used |
| 2D ACQUISITION |             | fn            | 2048     |
| sw1            | 5006.3      | F1 PROCESSING |          |
| ni             | 200         | gf1           | 0.037    |
| TRANSMITTER    |             | gfs1          | not used |
| tn             | H1          | procl         | lp       |
| sfrq           | 499.833     | fn1           | 2048     |
| tof            | -0.1        | DISPLAY       |          |
| tpwr           | 61          | sp            | 277.3    |
| pw             | 12.900      | wp            | 4649.4   |
| NOESY          |             | sp1           | 279.9    |
| mix            | 0.600       | wp1           | 4649.4   |
| PRESATURATION  |             | rfl           | 2771.5   |
| satmode        | nnnn        | rfp           | 2750.6   |
| satpwr         | 0           | rfl1          | 2768.9   |
| satdly         | 0           | rfp1          | 2750.6   |
| satfrq         | 0           | PLOT          |          |
| DECOUPLER      |             | wc            | 155.0    |
| dn             | C13         | sc            | 10.0     |
| dm             | nnn         | wc2           | 155.0    |
|                |             | sc2           | 0        |
|                |             | vs            | 148      |
|                |             | th            | 1        |
|                |             | ai            | ph       |

F2 (ppm)

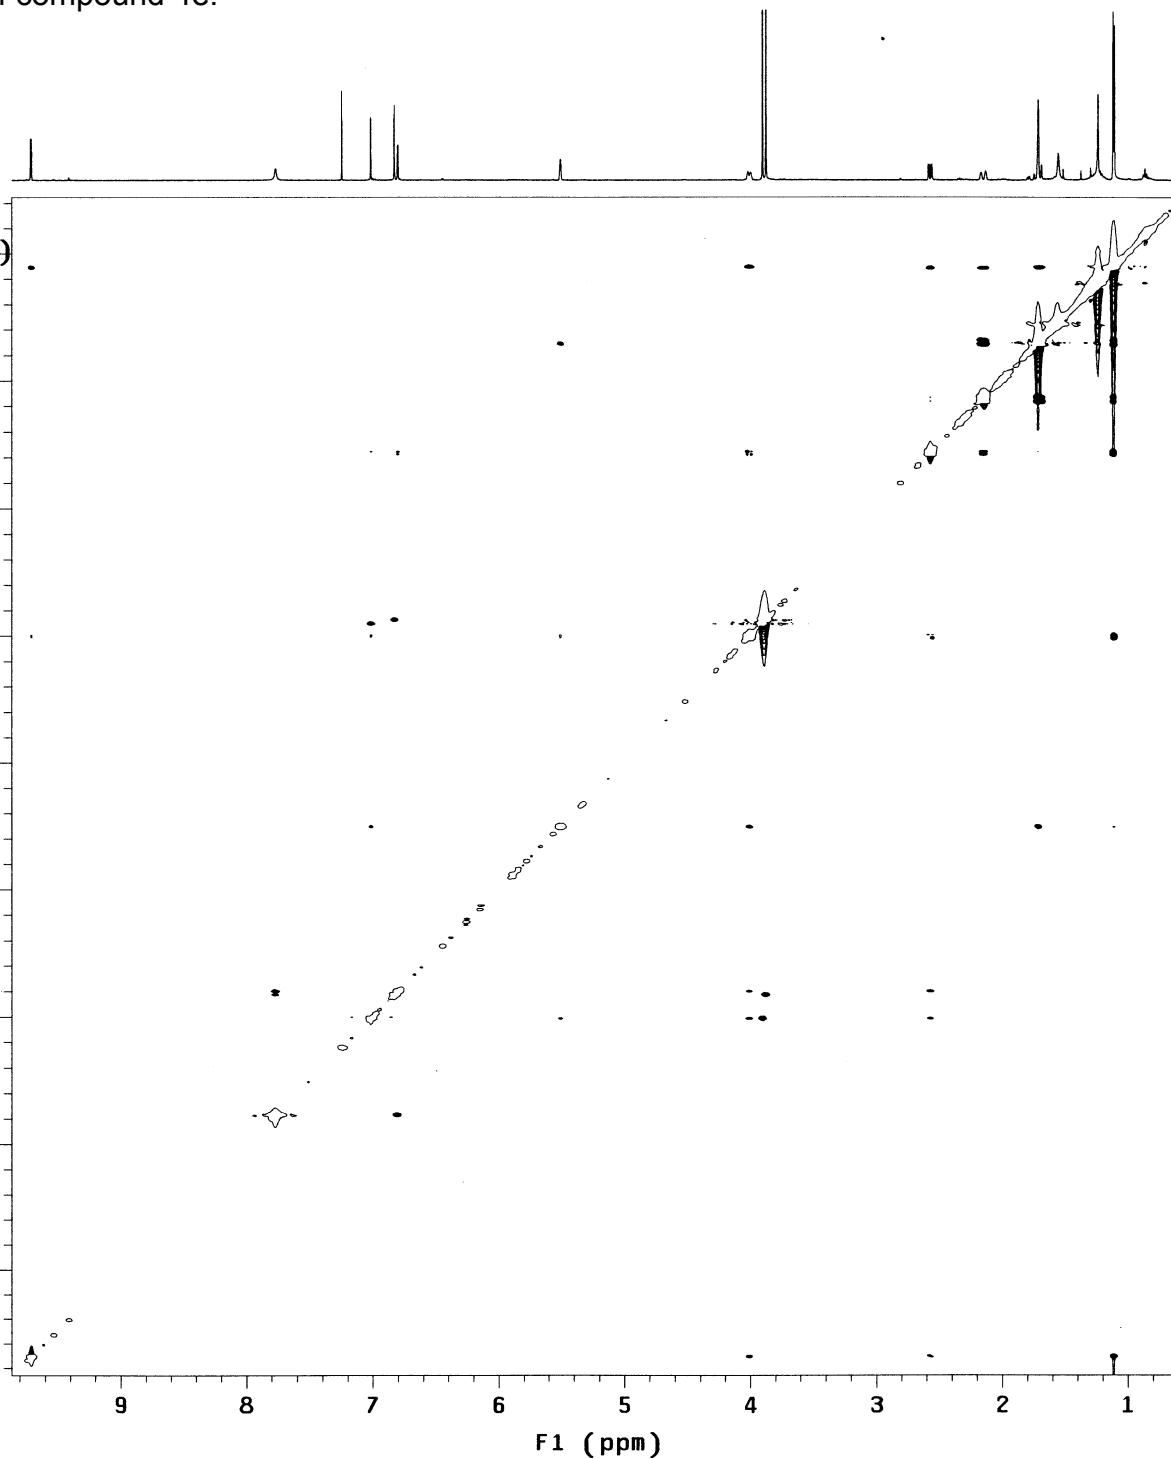

F1 (ppm)

Fig S44. <sup>1</sup>H NMR (CDCl<sub>3</sub>, 500 MHz) of compound 1a.

NSD-10-024

exp50 s2pul

```

SAMPLE
date Jun 9 2014 dfrq
solvent cdc13 dn
file exp dpwr
ACQUISITION dof
sfrq 499.833 dm
tn H1 dmm
at 3.000 dmf
np 48000 dseq
sw 8000.0 dres
fb not used homo
bs 4
tpwr 61 wtfile
pw 4.8 proc
d1 1.000 fn
tof 499.7 math
nt 4
ct 4 werr
alock y wexp
gain not used wbs
FLAGS wnt
il n
in n
dp y
hs nn
DISPLAY
sp -0.1
wp 4498.3
vs 55
sc 0
wc 210
hzmm 21.42
is 33.57
rfl 4636.2
rfp 3618.8
th 4
ins 100.000
nm cdc ph
    
```

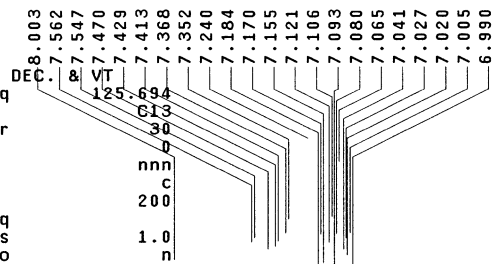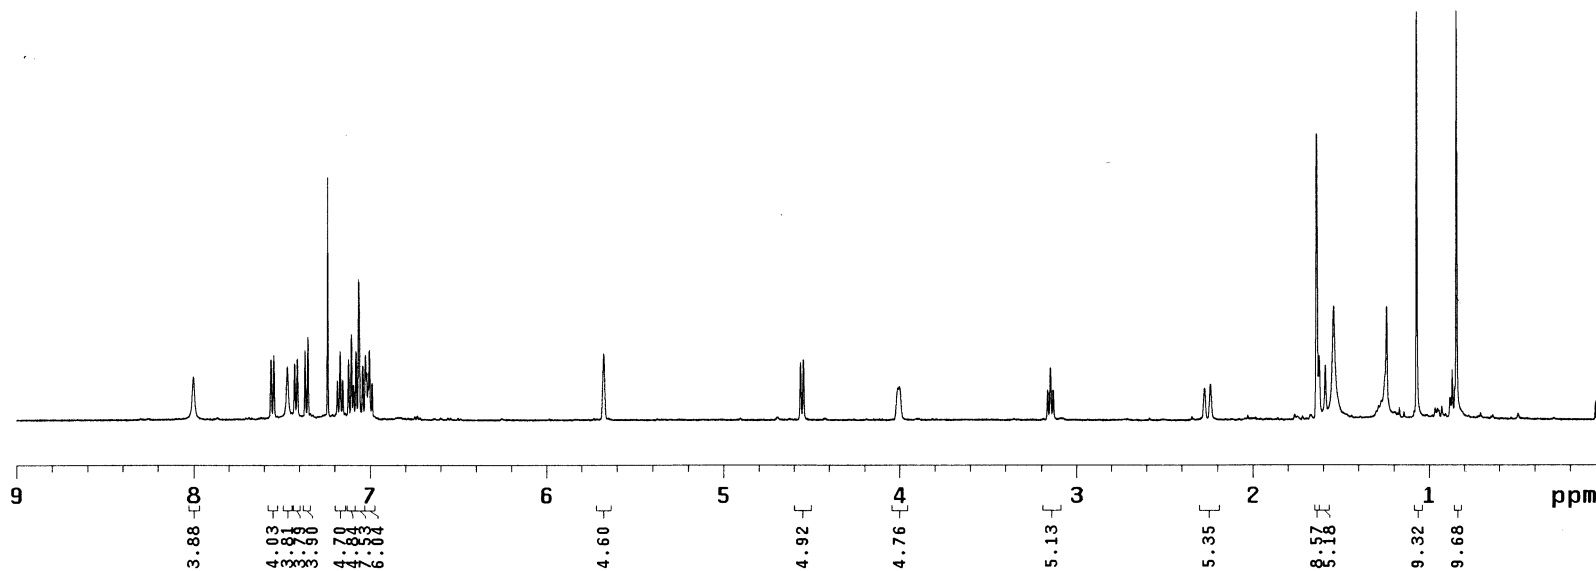

NSD-10-024

exp51 s2pu1

SAMPLE  
 date Jun 9 2014  
 solvent cdc13  
 file exp  
 ACQUISITION  
 sfrq 125.696  
 tn C13  
 at 1.000  
 np 60332  
 sw 30165.9  
 fb not used  
 bs 4  
 tpwr 60  
 pw 4.8  
 d1 1.000  
 tof 1883.7  
 nt 6000  
 ct 6000  
 alock y  
 gain not used  
 FLAGS  
 il n  
 in n  
 dp y  
 hs nn  
 DISPLAY  
 sp -0.2  
 wp 20108.9  
 vs 200  
 sc 0  
 wc 210  
 hzmm 95.76  
 is 33.57  
 rfl 10967.5  
 rfp 9677.5  
 th 6  
 ins 100.000  
 nm cdc ph

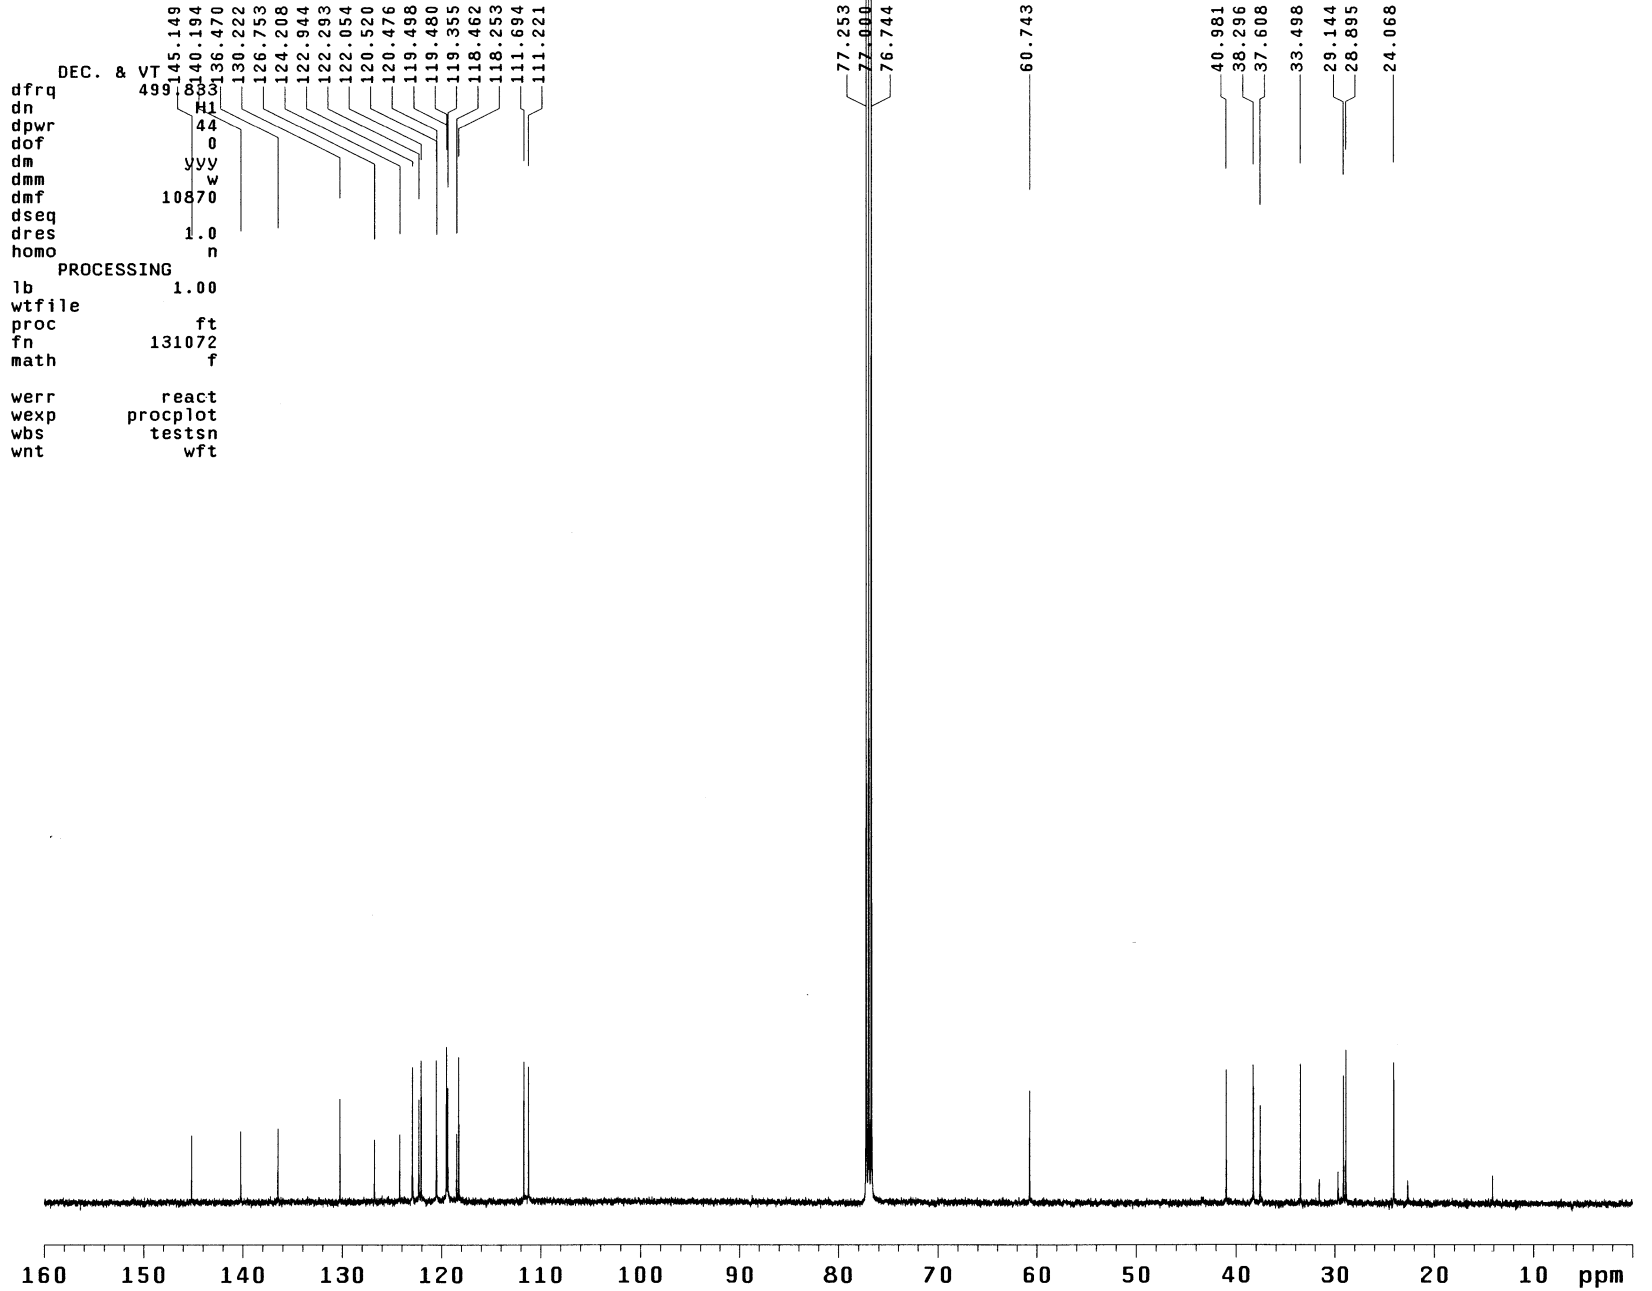Fig S45. <sup>13</sup>C NMR (CDCl<sub>3</sub>, 125 MHz) of compound 1a.

Fig S46. DEPT of compound 1a.

NSD-10-024

exp52 DEPT

|             |            |               |                    |
|-------------|------------|---------------|--------------------|
| SAMPLE      |            | DEPT          | ACQUISITION ARRAYS |
| date        | Jun 9 2014 | j1xh 140.0    | array mult         |
| solvent     | cdc13      | mult arrayed  | arraydim 3         |
| sample      | undefined  | SPECIAL       |                    |
| ACQUISITION |            | temp not used | i mult             |
| sw          | 30165.9    | gain 34       | 1 0.5              |
| at          | 1.000      | spin 0        | 2 1                |
| np          | 60332      | PROCESSING    | 3 1.5              |
| bs          | 4          | lb 1.00       |                    |
| ss          | -4         | fn 131072     |                    |
| d1          | 1.000      | SPECTRUM      |                    |
| nt          | 3000       | wp 20108.9    |                    |
| ct          | 3000       | sp -0.2       |                    |
| TRANSMITTER |            | rp -120.4     |                    |
| tn          | C13        | lp 227.9      |                    |
| tof         | 1883.7     | ai cdc ph     |                    |
| tpwr        | 60         | REFERENCE     |                    |
| pw          | 10.400     | rfl 1289.9    |                    |
| DECOUPLER   |            | rfp 0         |                    |
| dn          | H1         | PLOT          |                    |
| dof         | 0          | wc 210        |                    |
| dpwr        | 44         | sc 0          |                    |
| dm          | nny        | vs 800        |                    |
| dmm         | ccw        | hzmm 95.76    |                    |
| dmf         | 10870      | th 7          |                    |
| pp1v1       | 61         |               |                    |
| pp          | 14.600     |               |                    |

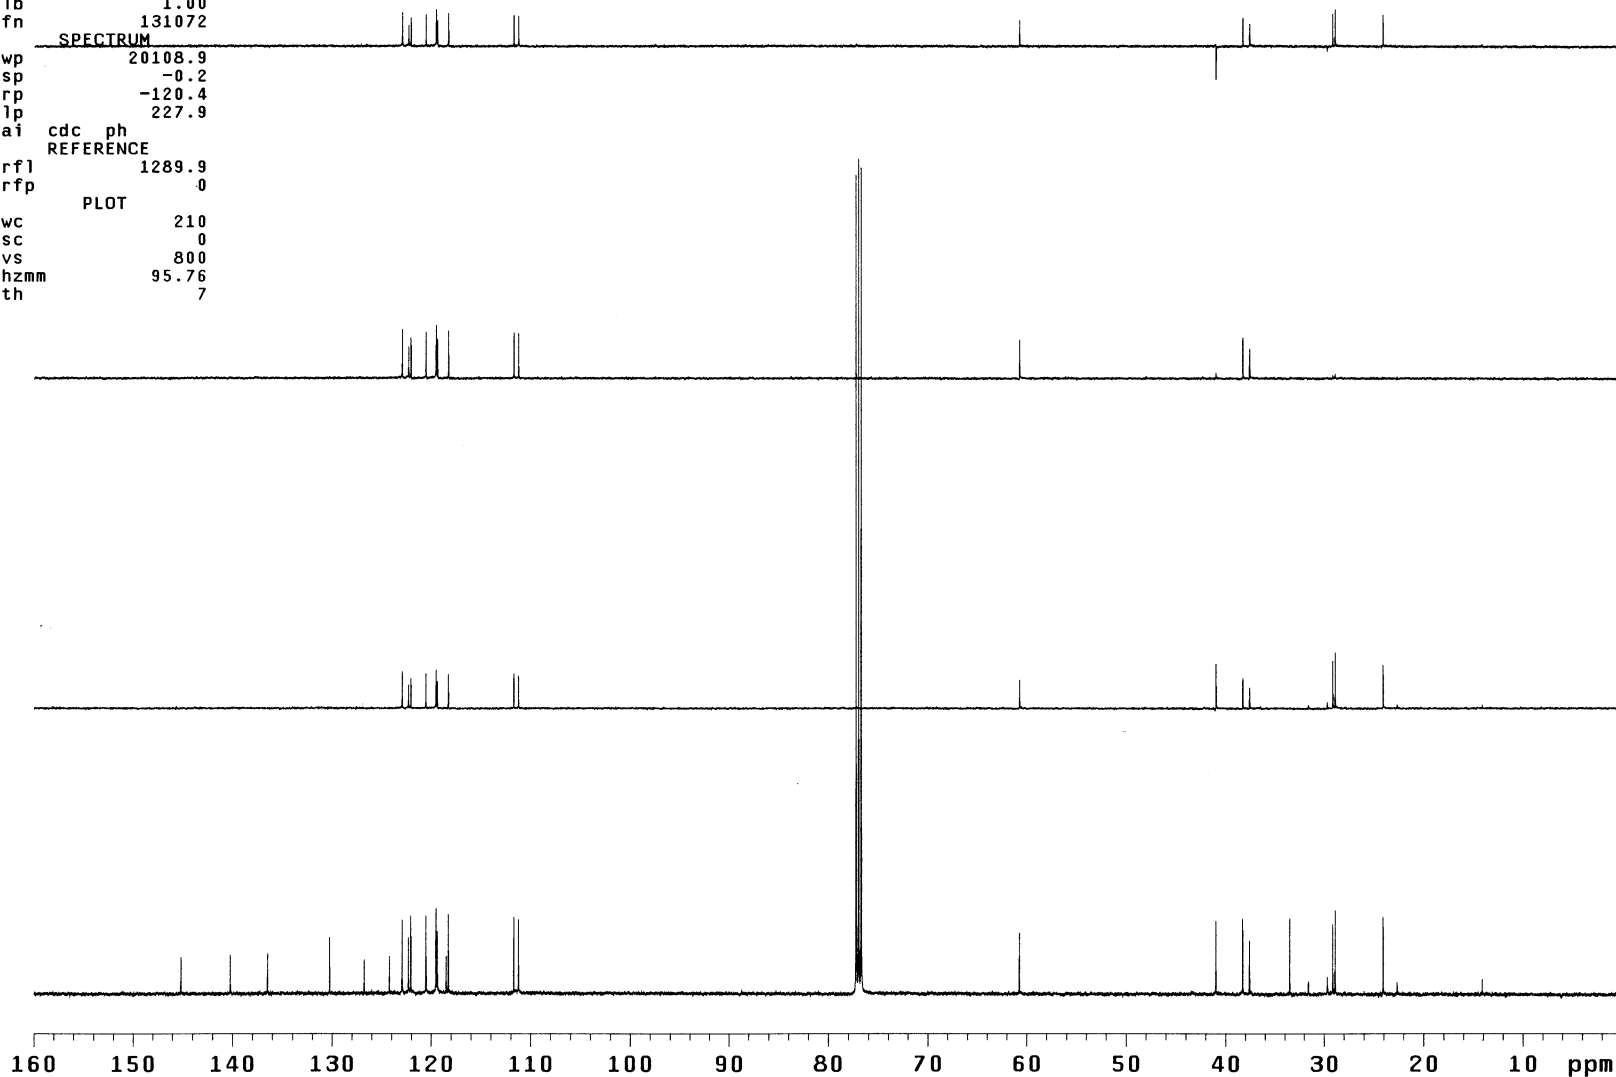

Fig S47. HSQC of compound 1a.

NSD-10-024

exp55 gHSQC

| SAMPLE  |                | FLAGS         |          | ACQUISITION |       | ARRAYS |  |
|---------|----------------|---------------|----------|-------------|-------|--------|--|
| date    | Jun 9 2014     | hs            | n        | array       | phase |        |  |
| solvent | cdcl3          | sspu1         | y        | arraydim    | 256   |        |  |
| sample  | undefined      | PFGflg        | y        |             |       |        |  |
|         | ACQUISITION    | hsglv1        | 1009     | 1           | phase |        |  |
| sw      | 4490.3         | SPECIAL       | 1        | 1           | 1     |        |  |
| at      | 0.228          | temp          | not used | 2           | 2     |        |  |
| np      | 2048           | gain          | 54       |             |       |        |  |
| fb      | not used       | spin          | 0        |             |       |        |  |
| ss      | 32             | GRADIENTS     |          |             |       |        |  |
| d1      | 1.000          | gzlv11        | 1009     |             |       |        |  |
| nt      | 8              | gt1           | 0.002000 |             |       |        |  |
|         | 2D ACQUISITION | gzlv13        | 508      |             |       |        |  |
| sw1     | 21367.5        | gt3           | 0.001000 |             |       |        |  |
| ni      | 128            | gstab         | 0.000500 |             |       |        |  |
| phase   | arrayed        | F2 PROCESSING |          |             |       |        |  |
|         | TRANSMITTER    | gf            | 0.105    |             |       |        |  |
| tn      | H1             | gfs           | not used |             |       |        |  |
| sfrq    | 499.833        | fn            | 2048     |             |       |        |  |
| tof     | -250.0         | F1 PROCESSING |          |             |       |        |  |
| tpwr    | 61             | gf1           | 0.006    |             |       |        |  |
| pw      | 12.900         | gfs1          | not used |             |       |        |  |
|         | DECOUPLER      | proc1         | ip       |             |       |        |  |
| dn      | C13            | fn1           | 2048     |             |       |        |  |
| dof     | -2515.1        | DISPLAY       |          |             |       |        |  |
| dm      | nny            | sp            | 326.2    |             |       |        |  |
| dmm     | ccp            | wp            | 3608.9   |             |       |        |  |
| dmf     | 32258          | sp1           | 2797.6   |             |       |        |  |
| dpwr    | 42             | wp1           | 12979.1  |             |       |        |  |
| pxlv1   | 59             | rfl           | 2848.5   |             |       |        |  |
| pxw     | 12.200         | rfp           | 2837.0   |             |       |        |  |
|         | HSQC           | rfl1          | 16723.3  |             |       |        |  |
| j1xh    | 140.0          | rfpl          | 15451.9  |             |       |        |  |
| nullflg | y              | PLOT          |          |             |       |        |  |
| mult    | 2              | wc            | 150.0    |             |       |        |  |
|         |                | sc            | 6.2      |             |       |        |  |
|         |                | wc2           | 116.2    |             |       |        |  |
|         |                | sc2           | 0        |             |       |        |  |
|         |                | vs            | 55       |             |       |        |  |
|         |                | th            | 6        |             |       |        |  |
|         |                | ai            | cdc ph   |             |       |        |  |

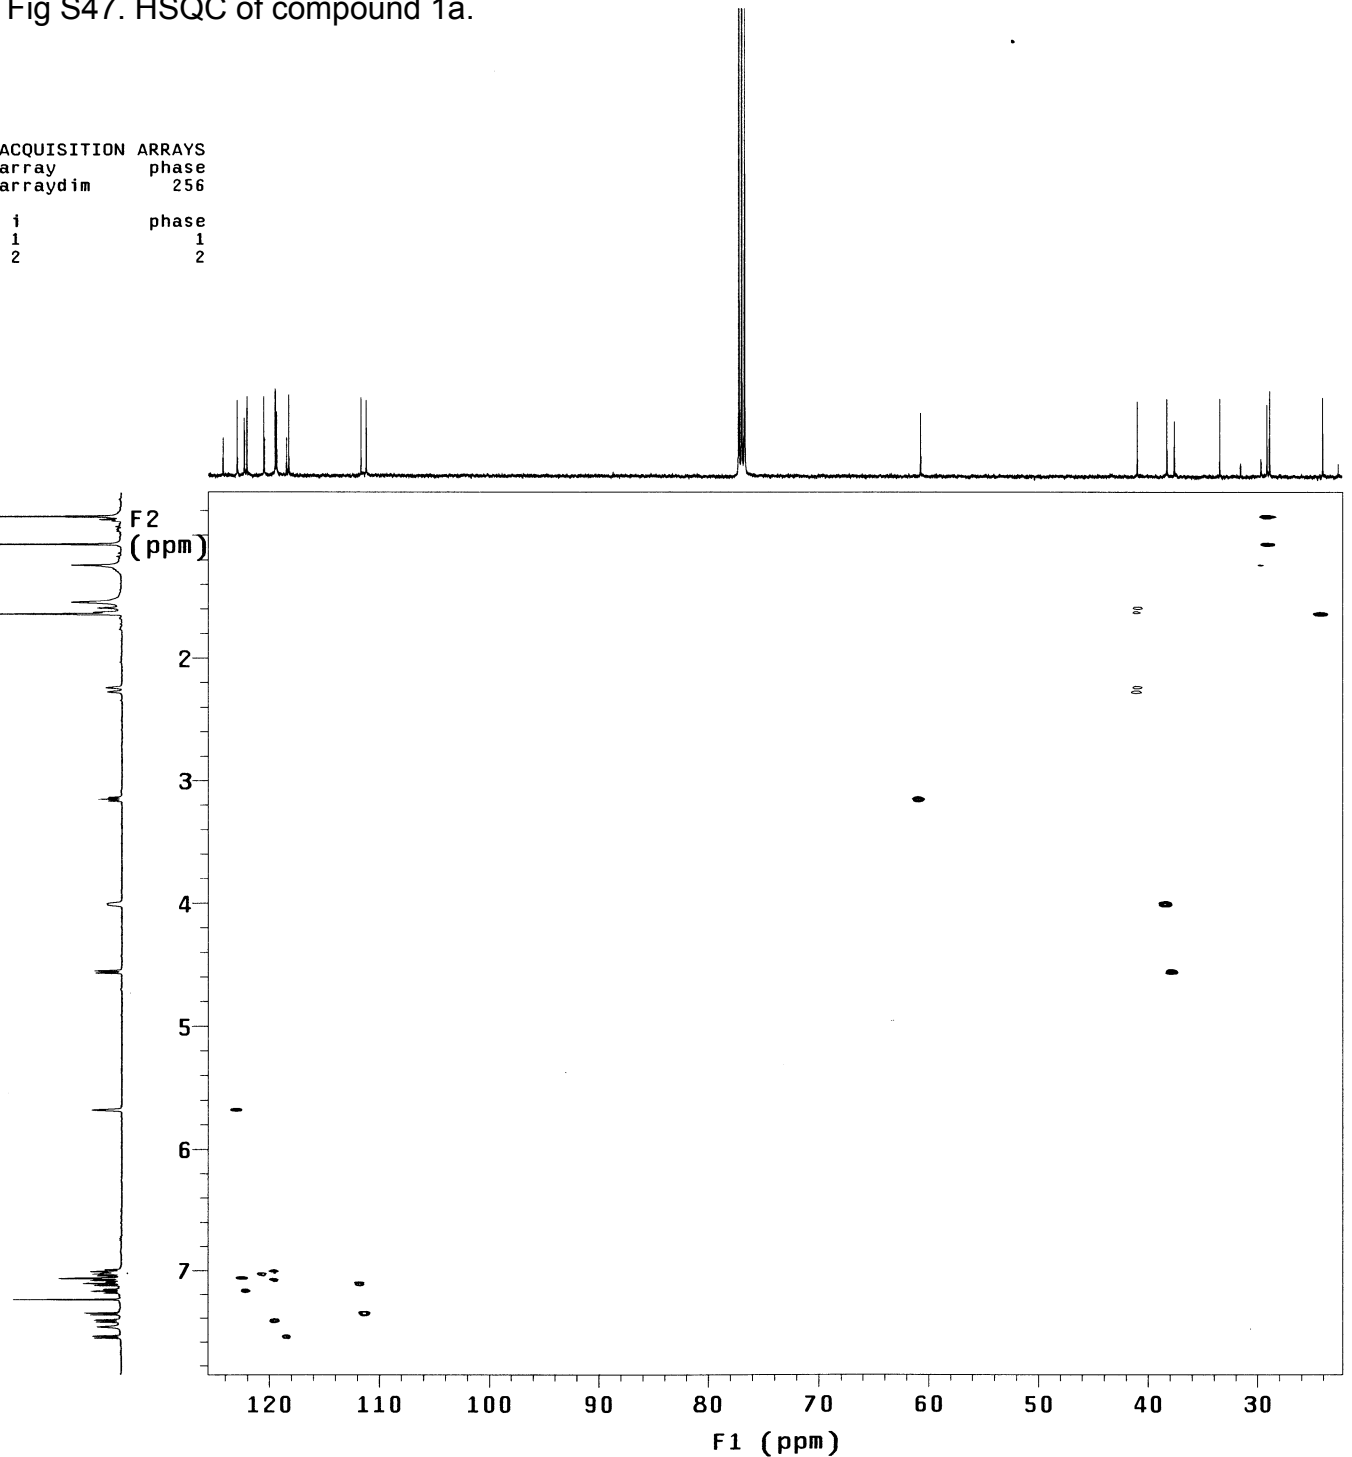

Fig S48. COSY of compound 1a.

NSD-10-024  
exp53 gCOSY

| SAMPLE         |            | FLAGS         |          |
|----------------|------------|---------------|----------|
| date           | Jun 9 2014 | hs            | nn       |
| solvent        | cdc13      | sspul         | n        |
| sample         | undefined  | hsglv1        | 1009     |
| ACQUISITION    |            | SPECIAL       |          |
| sw             | 4490.3     | temp          | not used |
| at             | 0.228      | gain          | 34       |
| np             | 2048       | spin          | 0        |
| fb             | not used   | F2 PROCESSING |          |
| ss             | 16         | sb            | -0.114   |
| d1             | 1.000      | sbs           | not used |
| nt             | 8          | fn            | 2048     |
| 2D ACQUISITION |            | F1 PROCESSING |          |
| sw1            | 4490.3     | sb1           | -0.029   |
| ni             | 128        | sbs1          | not used |
| TRANSMITTER    |            | PROC1         |          |
| tn             | H1         | fn1           | 2048     |
| sfrq           | 499.833    | DISPLAY       |          |
| tof            | -250.0     | sp            | 223.4    |
| tpwr           | 61         | wp            | 3841.4   |
| pw             | 12.900     | sp1           | 215.0    |
|                |            | wp1           | 3850.1   |
| GRADIENTS      |            | rfl           | 2850.4   |
| gzlv11         | 1009       | rfp           | 2837.0   |
| gt1            | 0.001000   | rf11          | 2850.0   |
| gstab          | 0.000500   | rfp1          | 2837.0   |
| DECOUPLER      |            | PLOT          |          |
| dn             | C13        | wc            | 155.0    |
| dm             | nnn        | sc            | 10.0     |
|                |            | wc2           | 155.0    |
|                |            | sc2           | 0        |
|                |            | vs            | 55       |
|                |            | th            | 7        |
|                |            | ai            | cdc av   |

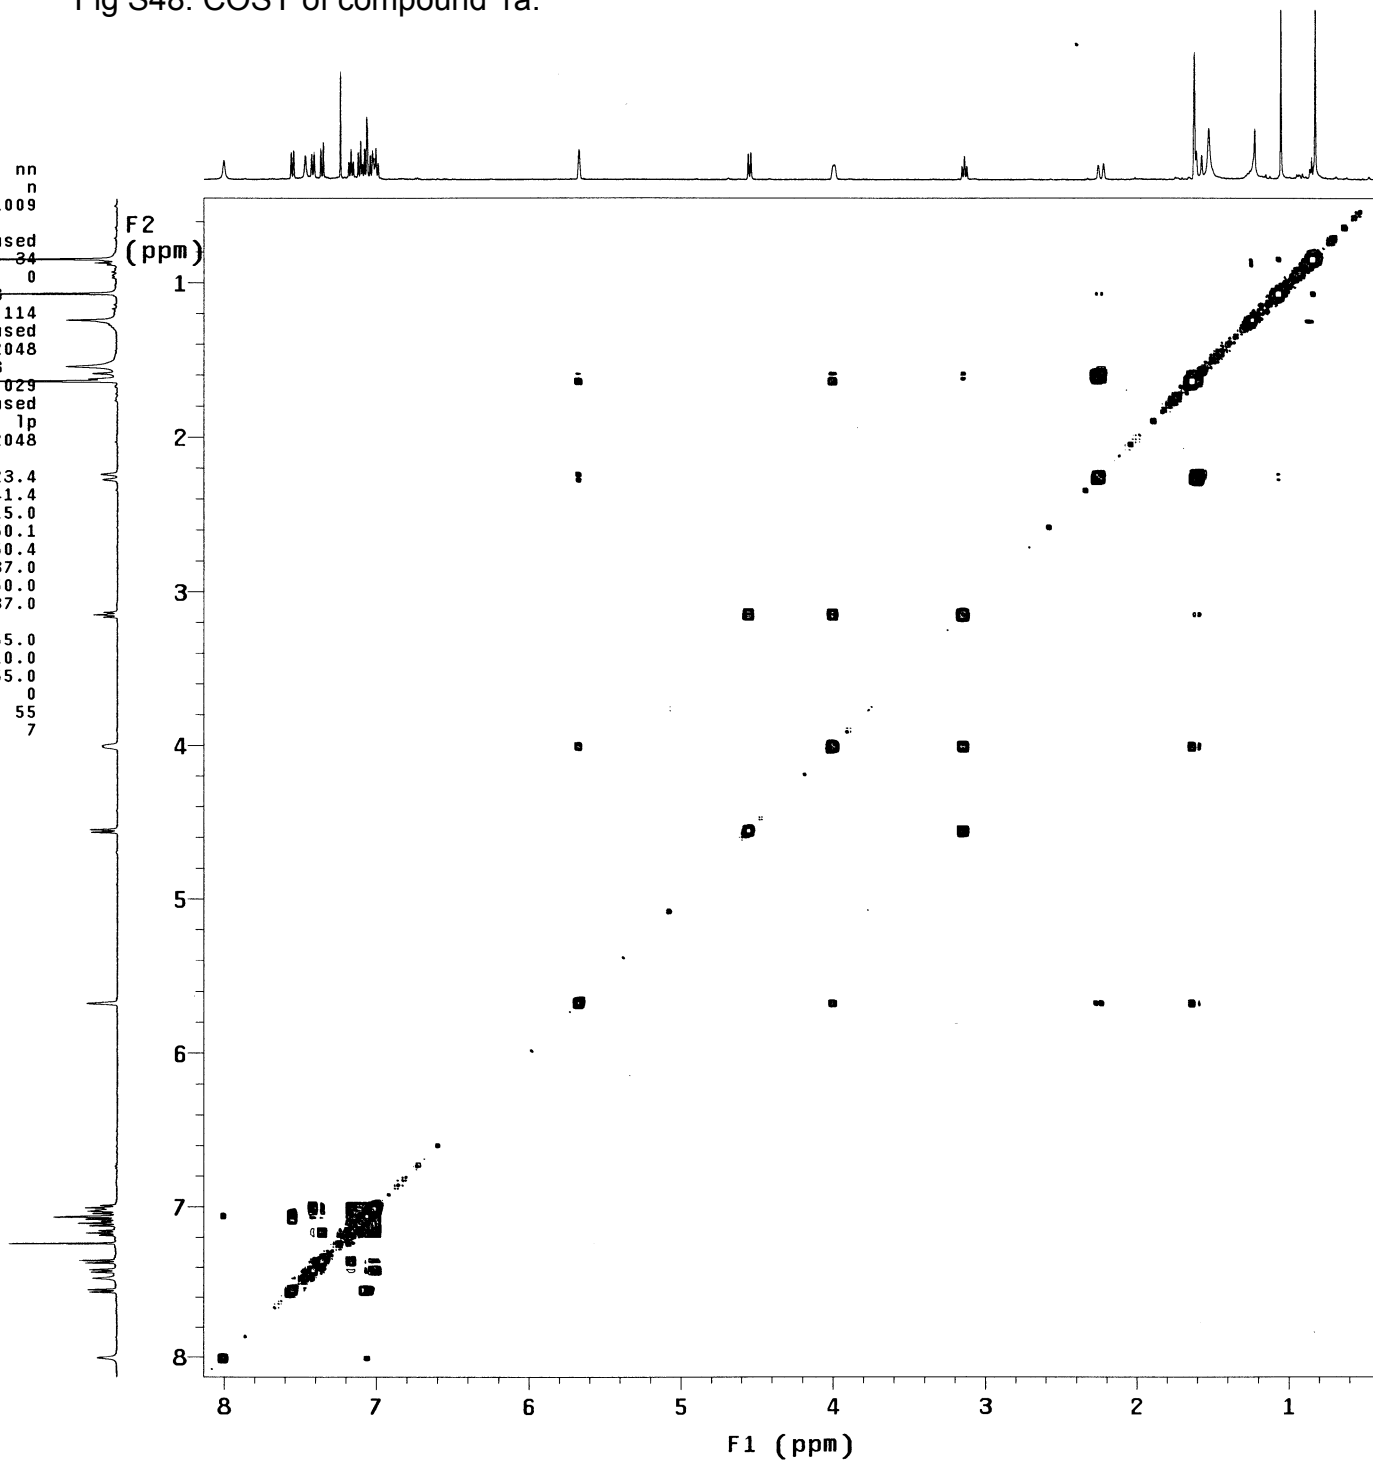



Fig S49. NOESY of compound 1a.

NSD-10-024

exp54 NOESY

| SAMPLE         |            | FLAGS         |          |
|----------------|------------|---------------|----------|
| date           | Jun 9 2014 | hs            | n        |
| solvent        | cdcl3      | sspul         | y        |
| sample         | undefined  | PFGflg        | y        |
| ACQUISITION    |            | hsglvi        | 1009     |
| sw             | 4490.3     | SPECIAL       |          |
| at             | 0.228      | temp          | not used |
| np             | 2048       | gain          | 34       |
| fb             | not used   | spin          | 0        |
| ss             | 32         | F2 PROCESSING |          |
| d1             | 1.000      | gf            | 0.105    |
| nt             | 16         | gfs           | not used |
| 2D ACQUISITION |            | fn            | 2048     |
| sw1            | 4490.3     | F1 PROCESSING |          |
| ni             | 200        | gf1           | 0.041    |
| TRANSMITTER    |            | gfs1          | not used |
| tn             | H1         | procl         | lp       |
| sfrq           | 499.833    | fn1           | 2048     |
| tof            | -250.0     | DISPLAY       |          |
| tpwr           | 61         | sp            | 131.8    |
| pw             | 12.900     | wp            | 4091.3   |
| NOESY          |            | sp1           | 132.0    |
| mix            | 0.600      | wp1           | 4086.9   |
| PRESATURATION  |            | rf1           | 2850.0   |
| satmode        | nnnn       | rfl           | 2837.0   |
| satpwr         | 0          | rfl1          | 2849.8   |
| satdly         | 0          | rfl1          | 2837.0   |
| satfrq         | 0          | PLOT          |          |
| DECOUPLER      |            | wc            | 155.0    |
| dn             | C13        | sc            | 10.0     |
| dm             | nnn        | wc2           | 155.0    |
|                |            | sc2           | 0        |
|                |            | vs            | 55       |
|                |            | th            | 1        |
|                |            | ai            | ph       |

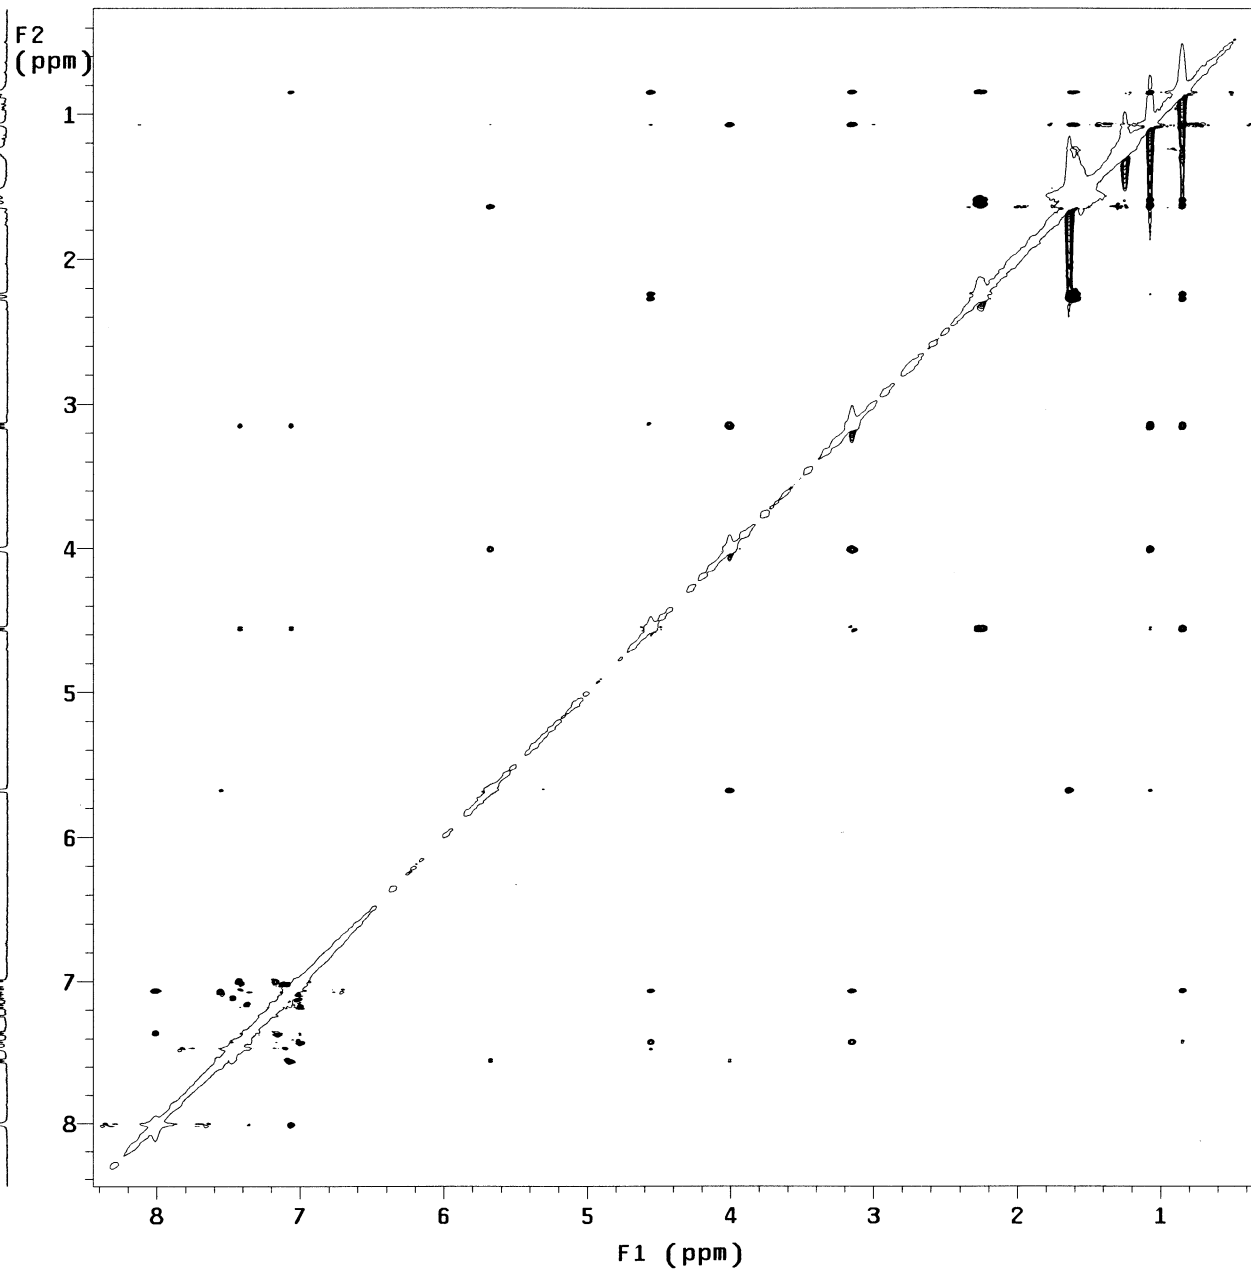

Fig S50. 1H NMR (C6D6, 500 MHz) of compound 1b.

NSD-10-018

exp50 s2pu1

```

SAMPLE
date May 27 2014 dfrq
solvent Benzene dn
file exp dpwr
ACQUISITION dof
sfrq 499.833 dm
tn H1 dmm
at 3.000 dmf
np 48000 dseq
sw 8000.0 dres
bs not used homo
tpwr 61 wtfile
pw 4.8 proc
d1 1.000 fn
tof 499.7 math
nt 4
ct 4 werr
alock y wexp
gain not used wbs
FLAGS wnt
il n
in n
dp y
hs nn
DISPLAY
sp -0.1
wp 3998.5
vs 120
sc 0
wc 210
hzmm 19.04
is 33.57
rfl 4564.7
rfp 3578.8
th 2
ins 100.000
nm cdc ph
    
```

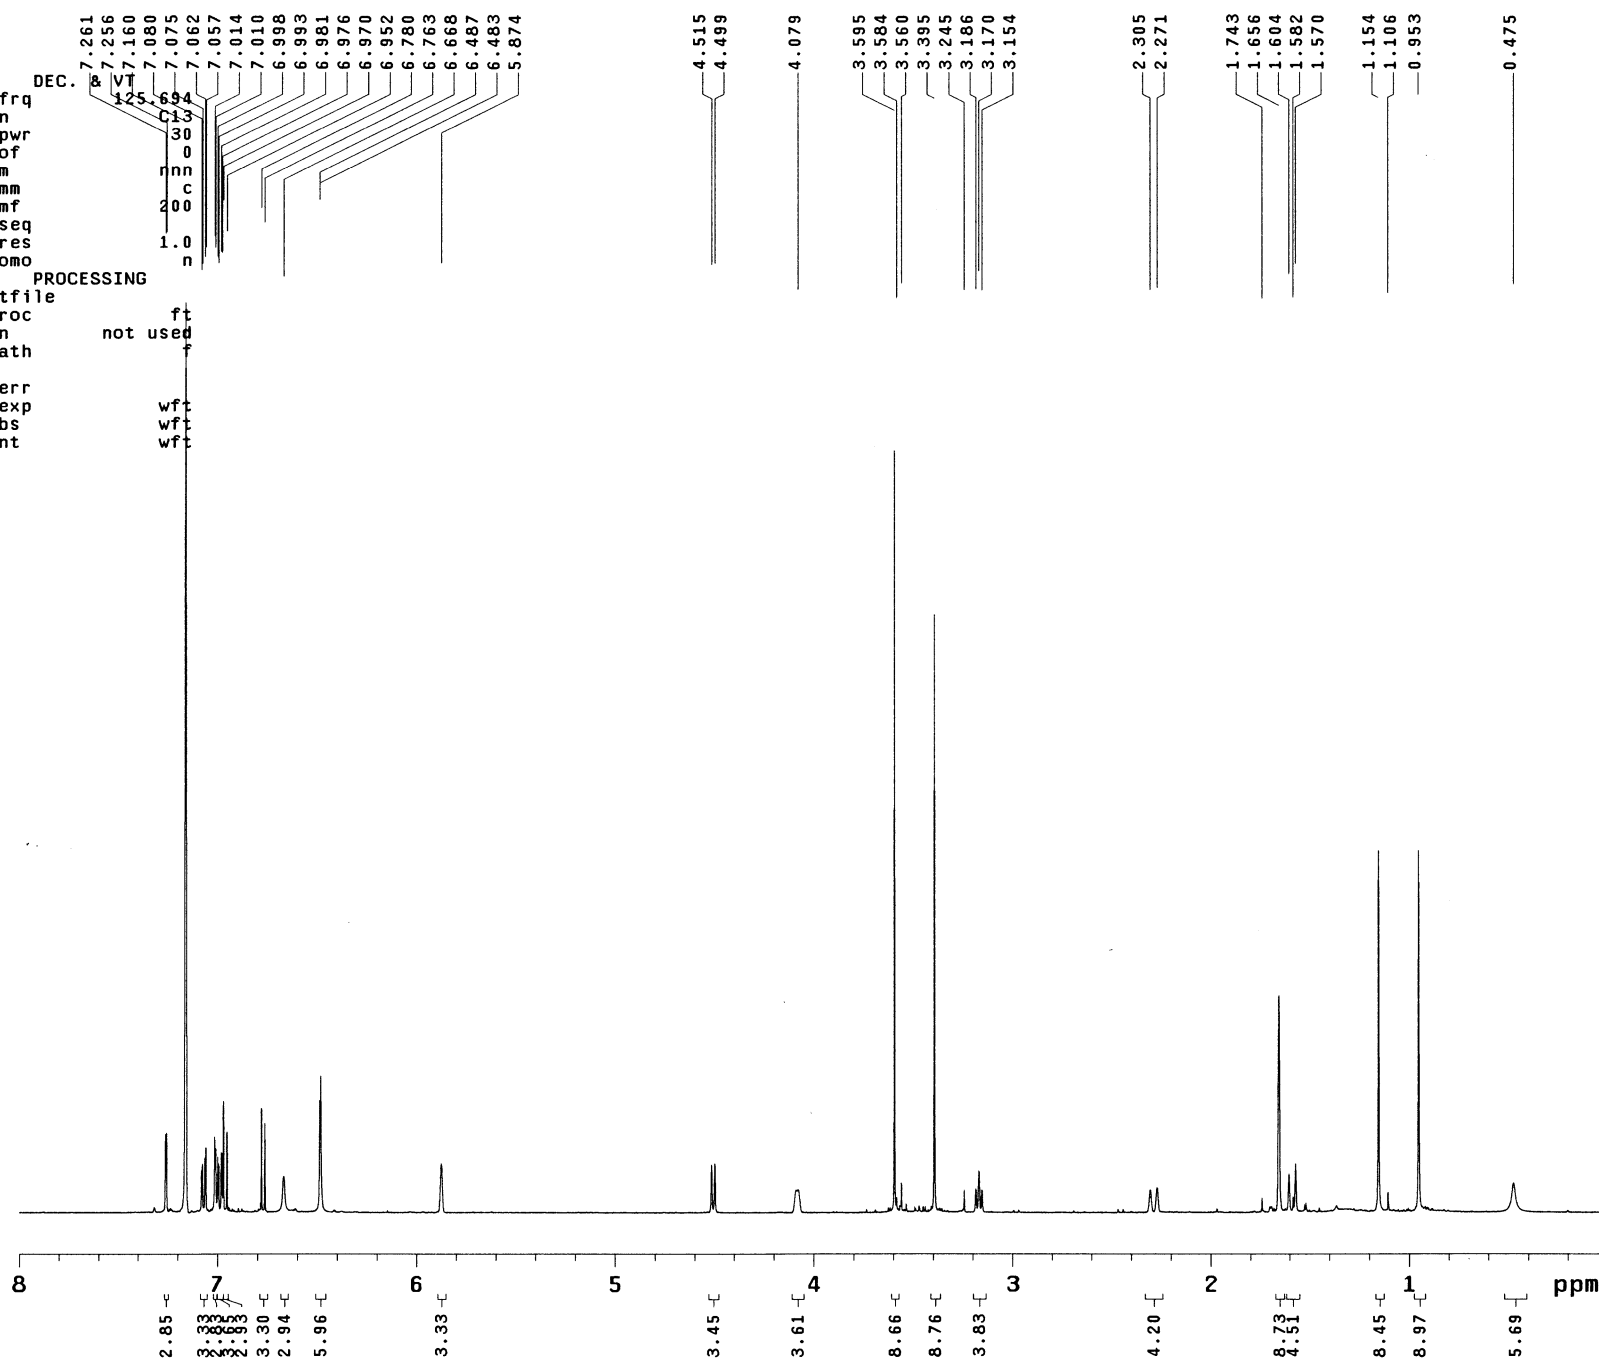

NSD-10-018

exp51 s2pu1

|             |             |            |         |
|-------------|-------------|------------|---------|
| SAMPLE      |             | DEC. & VT  |         |
| date        | May 26 2014 | dfrq       | 499.833 |
| solvent     | Benzene     | dn         | H1      |
| file        | exp         | dpwr       | 44      |
| ACQUISITION |             | dof        | 0       |
| sfrq        | 125.696     | dm         | yyy     |
| tn          | C13         | dmm        | w       |
| at          | 1.000       | dmf        | 10870   |
| np          | 60332       | dseq       |         |
| sw          | 30165.9     | dres       | 1.0     |
| fb          | not used    | homo       | n       |
| bs          | 4           | PROCESSING |         |
| tpwr        | 60          | lb         | 1.00    |
| pw          | 4.8         | wtfile     |         |
| d1          | 1.000       | proc       | ft      |
| tof         | 1883.7      | fn         | 131072  |
| nt          | 6000        | math       | f       |
| ct          | 6000        |            |         |
| alock       | y           | werr       |         |
| gain        | not used    | wexp       | wft     |
| FLAGS       |             | wbs        | wft     |
|             |             | wnt        | wft     |
| il          | n           |            |         |
| in          | n           |            |         |
| dp          | y           |            |         |
| hs          | nn          |            |         |
| DISPLAY     |             |            |         |
| sp          | -0.2        |            |         |
| wp          | 22622.6     |            |         |
| vs          | 2500        |            |         |
| sc          | 0           |            |         |
| wc          | 210         |            |         |
| hzmm        | 107.73      |            |         |
| is          | 33.57       |            |         |
| rfl         | 17334.7     |            |         |
| rfp         | 16136.4     |            |         |
| th          | 8           |            |         |
| ins         | 100.000     |            |         |
| nm          | cdc ph      |            |         |

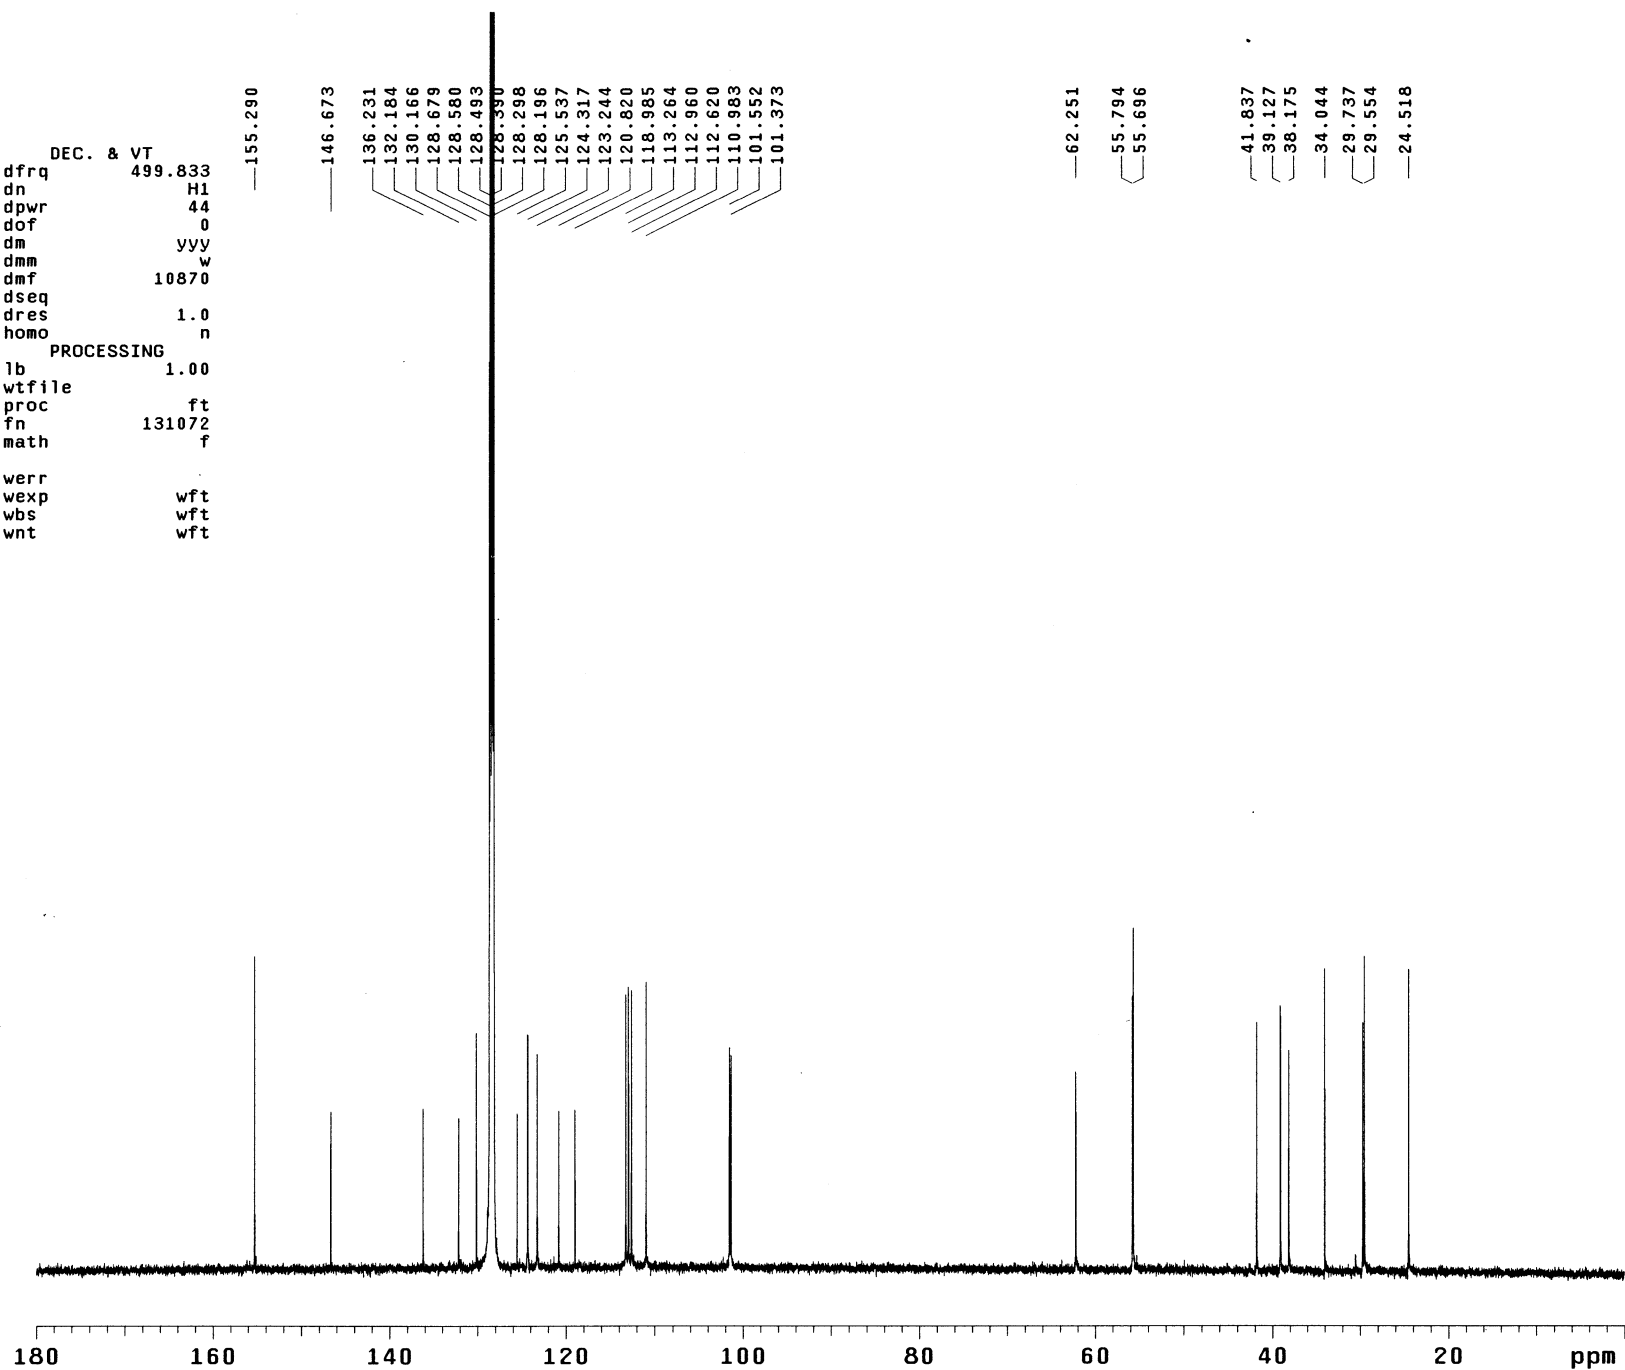Fig S51. <sup>13</sup>C NMR (C<sub>6</sub>D<sub>6</sub>, 125 MHz) of compound 1b.

NSD-10-018

exp52 DEPT

|                  |               |                    |
|------------------|---------------|--------------------|
| SAMPLE           | DEPT          | ACQUISITION ARRAYS |
| date May 26 2014 | j1xh 140.0    | array mult         |
| solvent Benzene  | mult arrayed  | arraydim 3         |
| sample undefined | SPECIAL       |                    |
| ACQUISITION      | temp not used | i mult             |
| sw 30165.9       | gain 50       | 1 0.5              |
| at 1.000         | spin 0        | 2 1                |
| np 60332         | PROCESSING    | 3 1.5              |
| bs 4             | lb 1.00       |                    |
| ss -4            | fn 131072     |                    |
| d1 1.000         | SPECTRUM      |                    |
| nt 3000          | wp 22622.6    |                    |
| ct 3000          | sp -0.2       |                    |
| TRANSMITTER      | rp -104.3     |                    |
| tn C13           | lp 173.2      |                    |
| tof 1883.7       | ai cdc ph     |                    |
| tpwr 60          | REFERENCE     |                    |
| pw 10.400        | rfl 1198.4    |                    |
| DECOUPLER        | rfp 0         |                    |
| dn H1            | PLOT          |                    |
| dof 0            | wc 210        |                    |
| dpwr 44          | sc 0          |                    |
| dm nny           | vs 850        |                    |
| dmm ccw          | hzmm 107.73   |                    |
| dmf 10870        | th 7          |                    |
| pp1v1 61         |               |                    |
| pp 14.600        |               |                    |

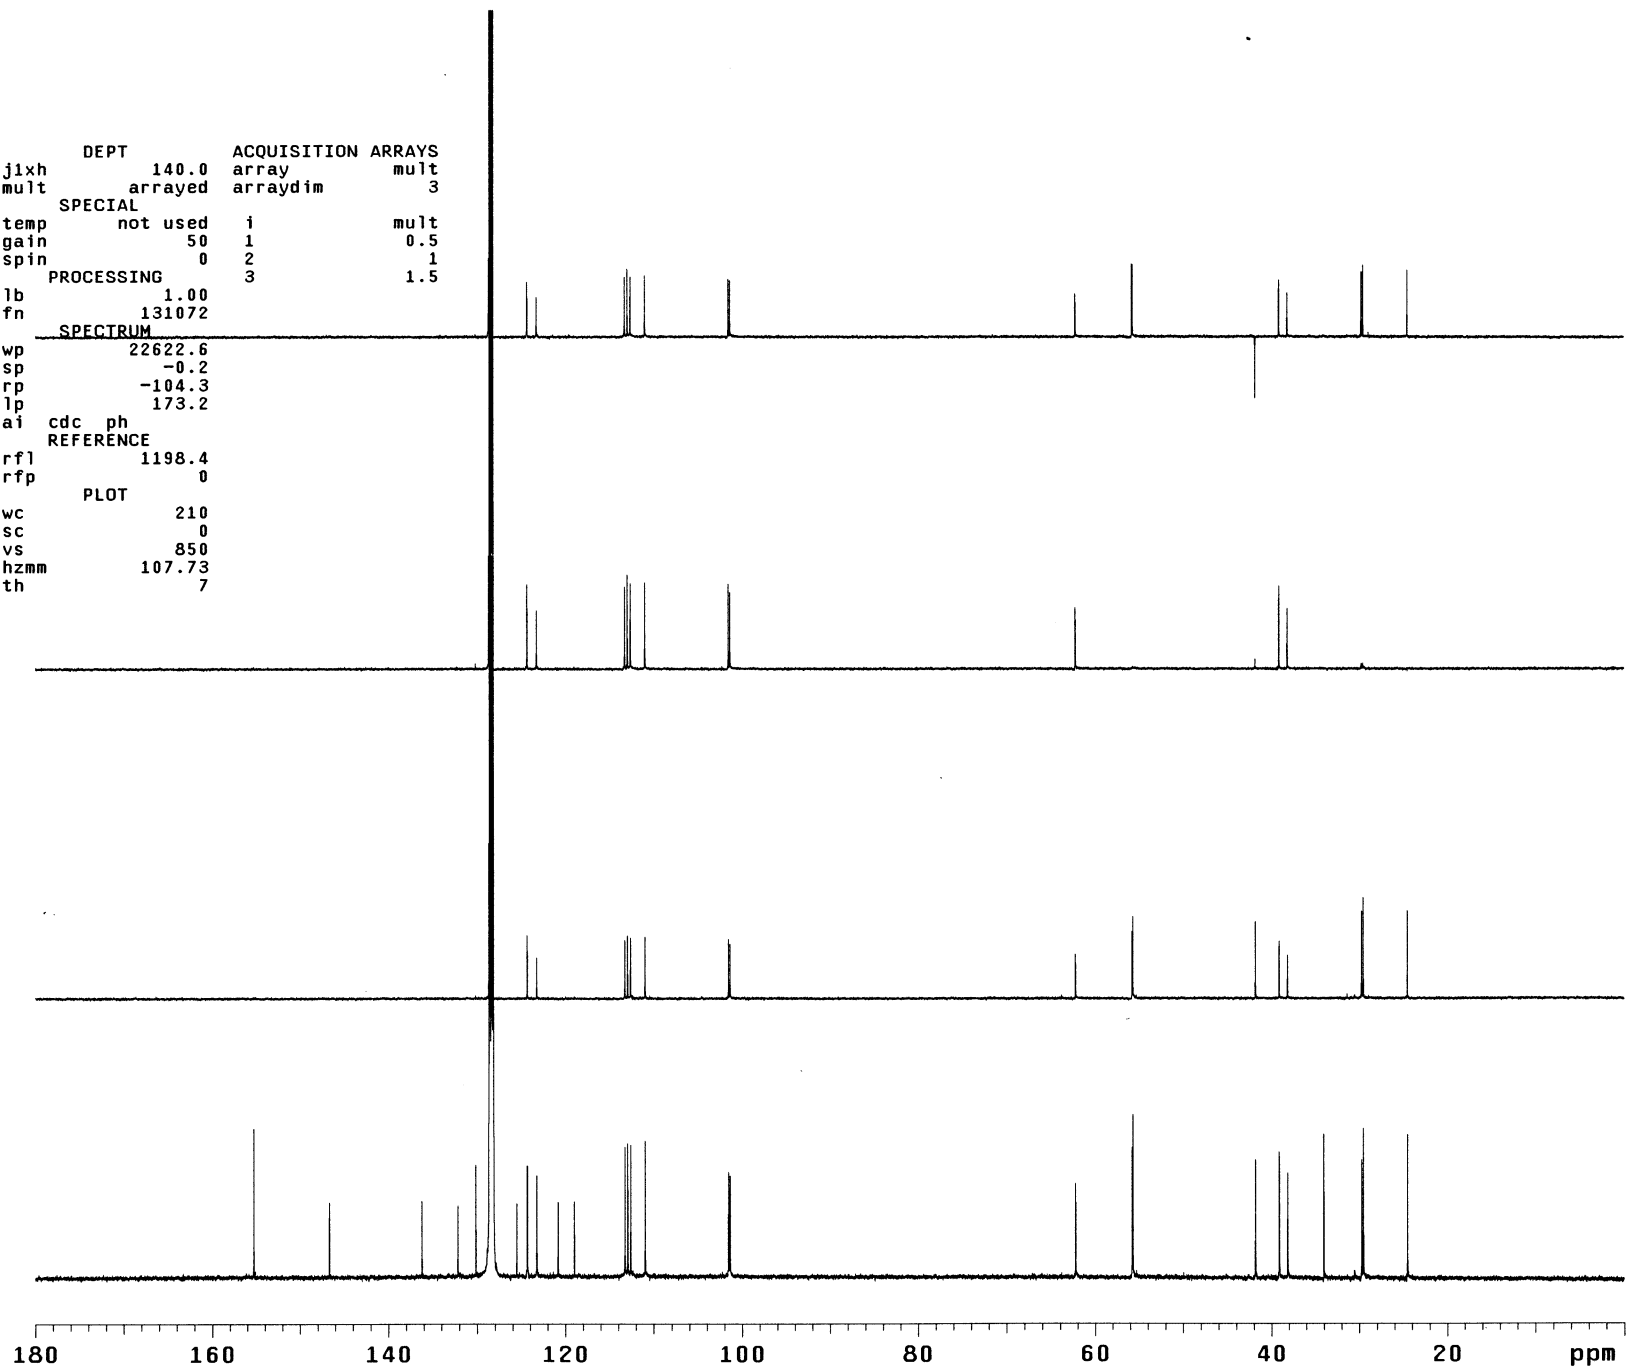

Fig S52. DEPT of compound 1b.

Fig S53. HMQC of compound 1b.

NSD-10-018

exp55 gHMQC

| SAMPLE           | FLAGS         | ACQUISITION | ARRAYS       |
|------------------|---------------|-------------|--------------|
| date May 27 2014 | hs            | n           | phase        |
| solvent Benzene  | sspul         | y           | arraydim 256 |
| sample undefined | PFGflg        | y           |              |
| ACQUISITION      | hsglv1        | 1009        | phase        |
| sw 4001.6        | SPECIAL       | 1           | 1            |
| at 0.128         | temp          | not used    | 2            |
| np 1024          | gain          | 50          |              |
| fb not used      | spin          | 0           |              |
| ss 32            | GRADIENTS     |             |              |
| d1 1.000         | gzlv11        | 1009        |              |
| nt 8             | gt1           | 0.001000    |              |
| 2D ACQUISITION   | gzlv13        | 508         |              |
| sw1 21367.5      | gt3           | 0.001000    |              |
| ni 128           | gstab         | 0.000500    |              |
| phase arrayed    | F2 PROCESSING |             |              |
| TRANSMITTER      | gf            | 0.059       |              |
| tn H1            | gfs           | not used    |              |
| sfrq 499.832     | fn            | 1024        |              |
| tof -500.0       | F1 PROCESSING |             |              |
| tpwr 61          | gf1           | 0.006       |              |
| pw 12.900        | gfs1          | not used    |              |
| DECOUPLER        | proc1         | 1           |              |
| dn C13           | fn1           | 2048        |              |
| dof -2515.1      | DISPLAY       |             |              |
| dm nny           | sp            | 372.7       |              |
| dmm ccp          | wp            | 3360.7      |              |
| dmf 32258        | sp1           | 2669.7      |              |
| dpwr 42          | wp1           | 13918.1     |              |
| pxlv1 59         | rfl           | 2922.8      |              |
| pxw 12.200       | rfp           | 2936.0      |              |
| HMQC             | rfl1          | 16836.0     |              |
| j1xh 140.0       | rfl1          | 15624.5     |              |
| nullfig y        | PLOT          |             |              |
|                  | wc            | 150.0       |              |
|                  | sc            | 6.2         |              |
|                  | wc2           | 116.2       |              |
|                  | sc2           | 0           |              |
|                  | vs            | 86          |              |
|                  | th            | 5           |              |
|                  | ai cdc ph     |             |              |

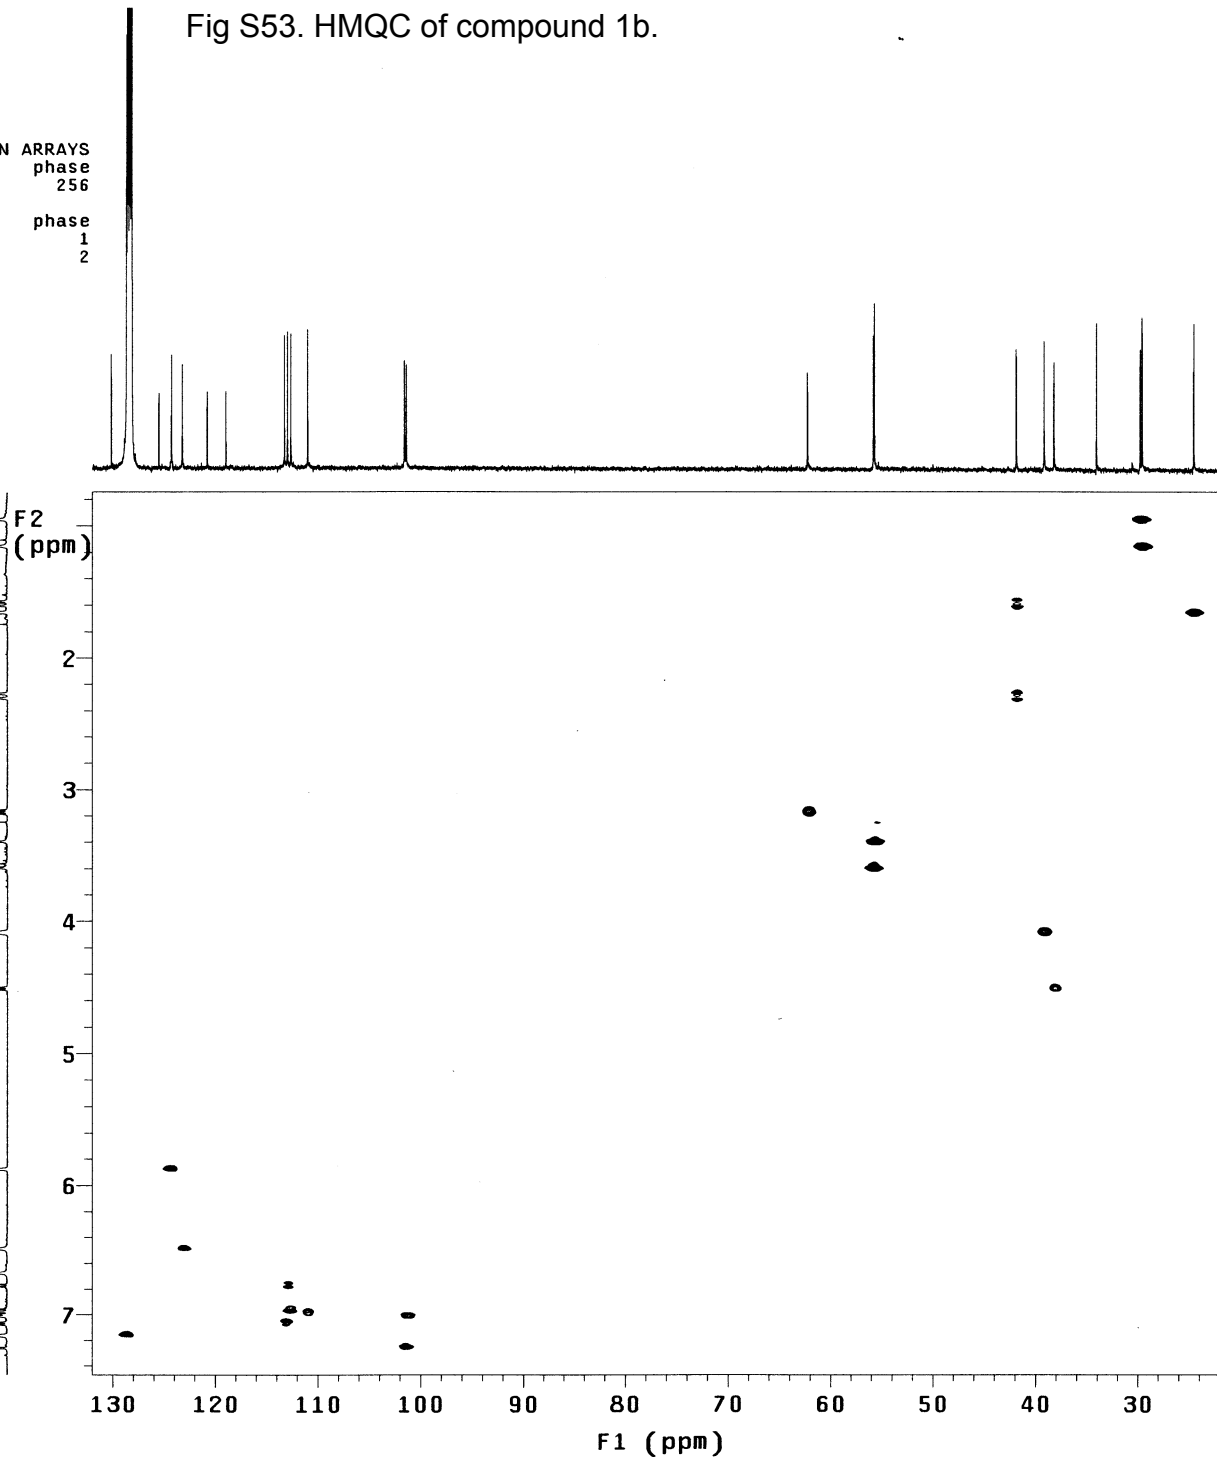

Fig S54. COSY of compound 1b.

NSD-10-018

exp53 gCOSY

|                |             |               |          |
|----------------|-------------|---------------|----------|
| SAMPLE         |             | FLAGS         | nn       |
| date           | May 27 2014 | hs            | n        |
| solvent        | Benzene     | sspul         | 1009     |
| sample         | undefined   | hsglv1        |          |
| ACQUISITION    |             | SPECIAL       |          |
| sw             | 4001.6      | temp          | not used |
| at             | 0.128       | gain          | 30       |
| np             | 1024        | spin          | 0        |
| fb             | not used    | F2 PROCESSING |          |
| ss             | 16          | sb            | -0.064   |
| d1             | 1.000       | sbs           | not used |
| nt             | 8           | fn            | 1024     |
| 2D ACQUISITION |             | F1 PROCESSING |          |
| sw1            | 4001.6      | sb1           | -0.032   |
| ni             | 128         | sbs1          | not used |
| TRANSMITTER    |             | proc1         | 1p       |
| tn             | H1          | fn1           | 1024     |
| sfrq           | 499.832     | DISPLAY       |          |
| tof            | -500.0      | sp            | 435.3    |
| tpwr           | 61          | wp            | 3235.7   |
| pw             | 12.900      | sp1           | 428.2    |
| GRADIENTS      |             | wp1           | 3235.7   |
| gzlv11         | 1009        | rfl           | 2922.8   |
| gt1            | 0.001000    | rfp           | 2936.0   |
| gstab          | 0.000500    | rfl1          | 2922.0   |
| DECOUPLER      |             | rfl1          | 2936.0   |
| dn             | C13         | PLOT          |          |
| dm             | nnn         | wc            | 155.0    |
|                |             | sc            | 10.0     |
|                |             | wc2           | 155.0    |
|                |             | sc2           | 0        |
|                |             | vs            | 86       |
|                |             | th            | 6        |
|                |             | ai            | cdc av   |

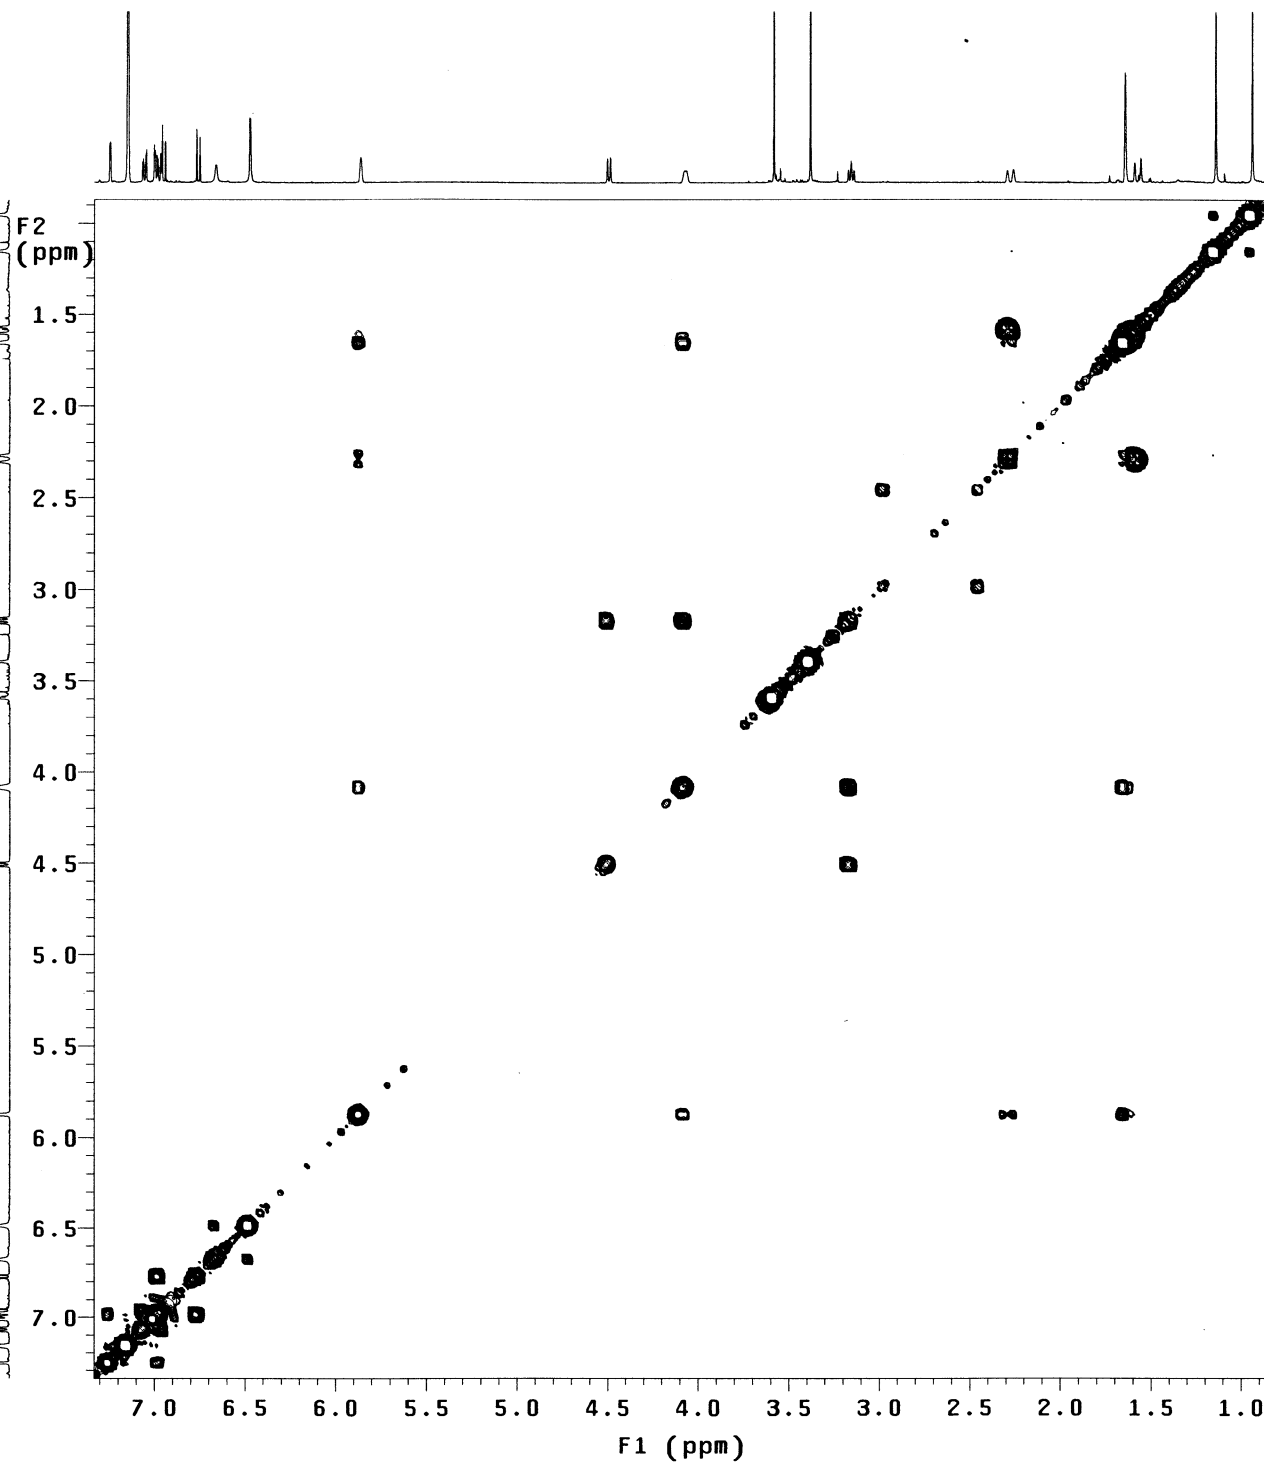

Fig S55. NOESY of compound 1b.

NSD-10-018

exp54 NOESY

| SAMPLE         |             | FLAGS         |          |
|----------------|-------------|---------------|----------|
| date           | May 27 2014 | hs            | n        |
| solvent        | Benzene     | sspul         | y        |
| sample         | undefined   | PFGflg        | y        |
| ACQUISITION    |             | hsglv1        | 1009     |
| sw             | 4001.6      | SPECIAL       |          |
| at             | 0.128       | temp          | not used |
| np             | 1024        | gain          | 30       |
| fb             | not used    | spin          | 0        |
| ss             | 32          | F2 PROCESSING |          |
| d1             | 1.000       | gf            | 0.059    |
| nt             | 16          | gfs           | not used |
| 2D ACQUISITION |             | fn            | 1024     |
| sw1            | 4001.6      | F1 PROCESSING |          |
| ni             | 200         | gf1           | 0.046    |
| TRANSMITTER    |             | gfs1          | not used |
| tn             | H1          | proc1         | 1p       |
| sfrq           | 499.832     | fn1           | 1024     |
| tof            | -500.0      | DISPLAY       |          |
| tpwr           | 61          | sp            | 154.2    |
| pw             | 12.900      | wp            | 3595.2   |
| NOESY          |             | sp1           | 162.2    |
| mix            | 0.600       | wp1           | 3595.2   |
| PRESATURATION  |             | rf1           | 2922.4   |
| satmode        | nnnn        | rfp           | 2936.0   |
| satpwr         | 0           | rf11          | 2922.3   |
| satdly         | 0           | rfp1          | 2936.0   |
| satfrq         | 0           | PLOT          |          |
| DECOUPLER      |             | wc            | 155.0    |
| dn             | C13         | sc            | 10.0     |
| dm             | nnn         | wc2           | 155.0    |
|                |             | sc2           | 0        |
|                |             | vs            | 86       |
|                |             | th            | 1        |
|                |             | ai            | ph       |

F2 (ppm)

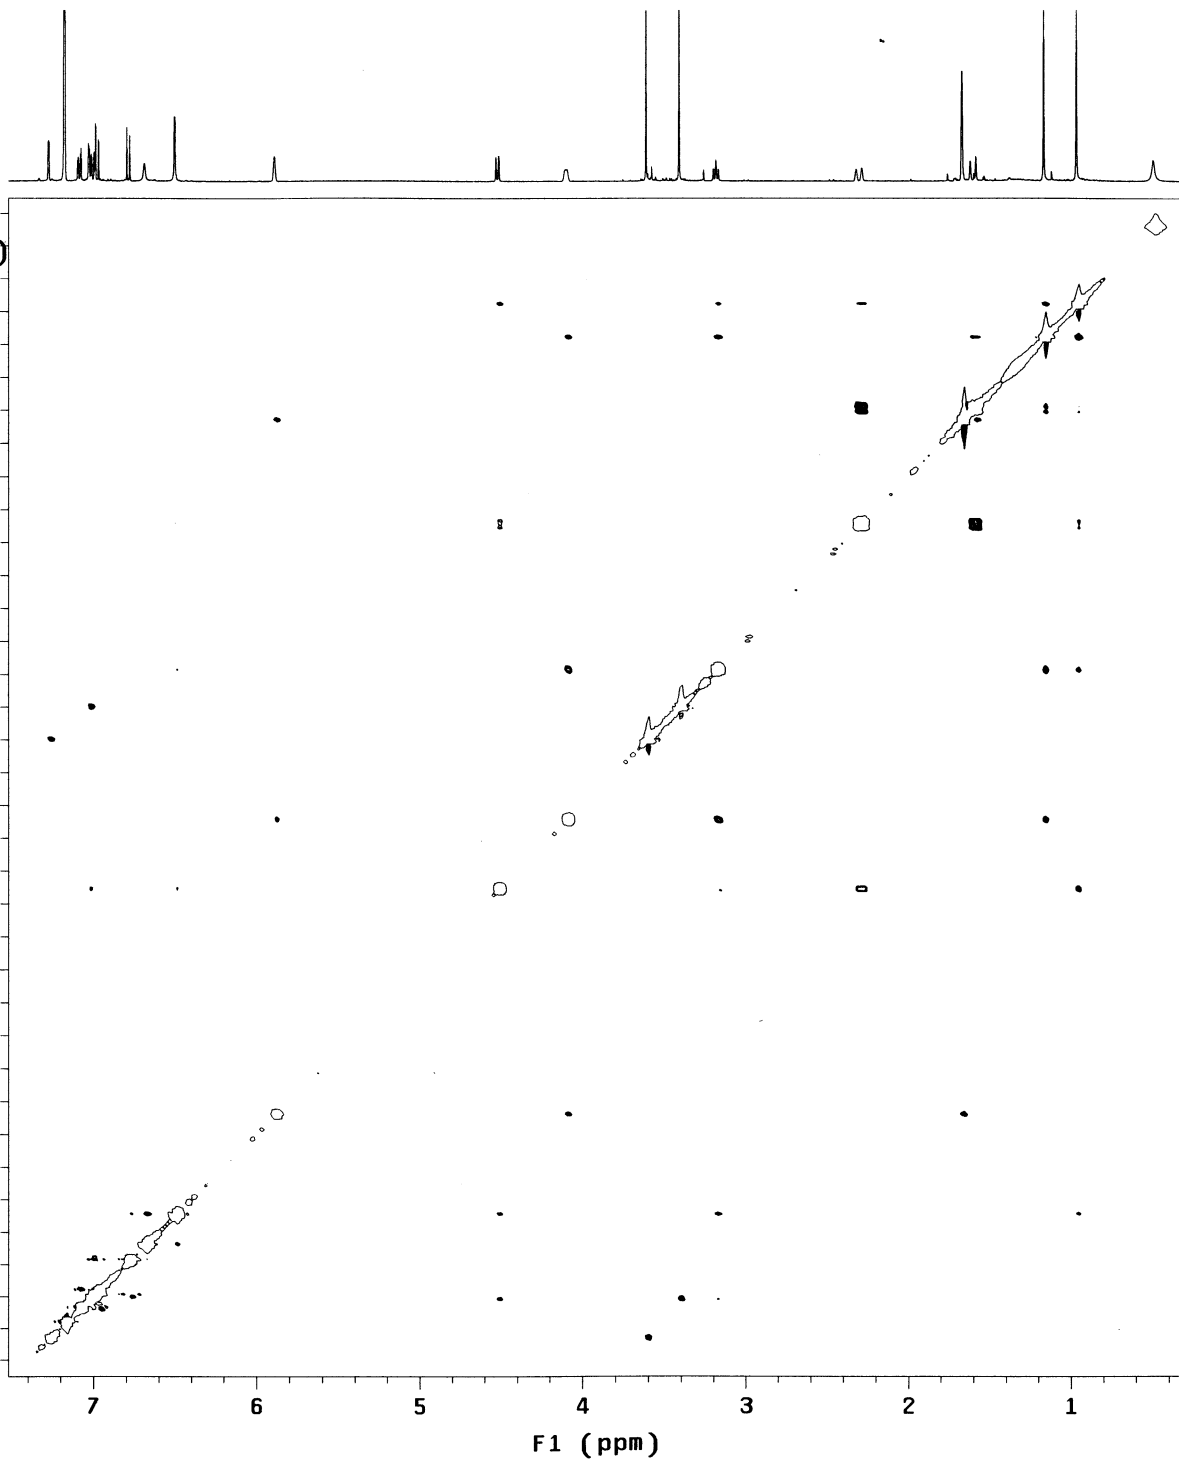

Fig S56. <sup>1</sup>H NMR (C<sub>6</sub>D<sub>6</sub>, 500 MHz) of compound 1c.

```

NSD-10-026
exp40 s2pu1
SAMPLE
date Jun 13 2014 dfrq
solvent Benzene dn
file exp dpwr
ACQUISITION dof
sfrq 499.833 dm
tn H1 dmm
at 3.000 dmf
np 48000 dseq
sw 8000.0 dres
fb not used homo
bs 4
tpwr 61 wtfile
pw 4.8 proc
d1 1.000 fn
tof 499.7 math
nt 4
ct 4 werr
alock y wexp
gain not used wbs
FLAGS wnt
il n
in n
dp y
hs nn
DISPLAY
sp -0.1
wp 3998.5
vs 200
sc 0
wc 210
hzmm 19.04
is 33.57
rfl 4564.9
rfp 3578.8
th 3
ins 100.000
nm cdc ph
    
```

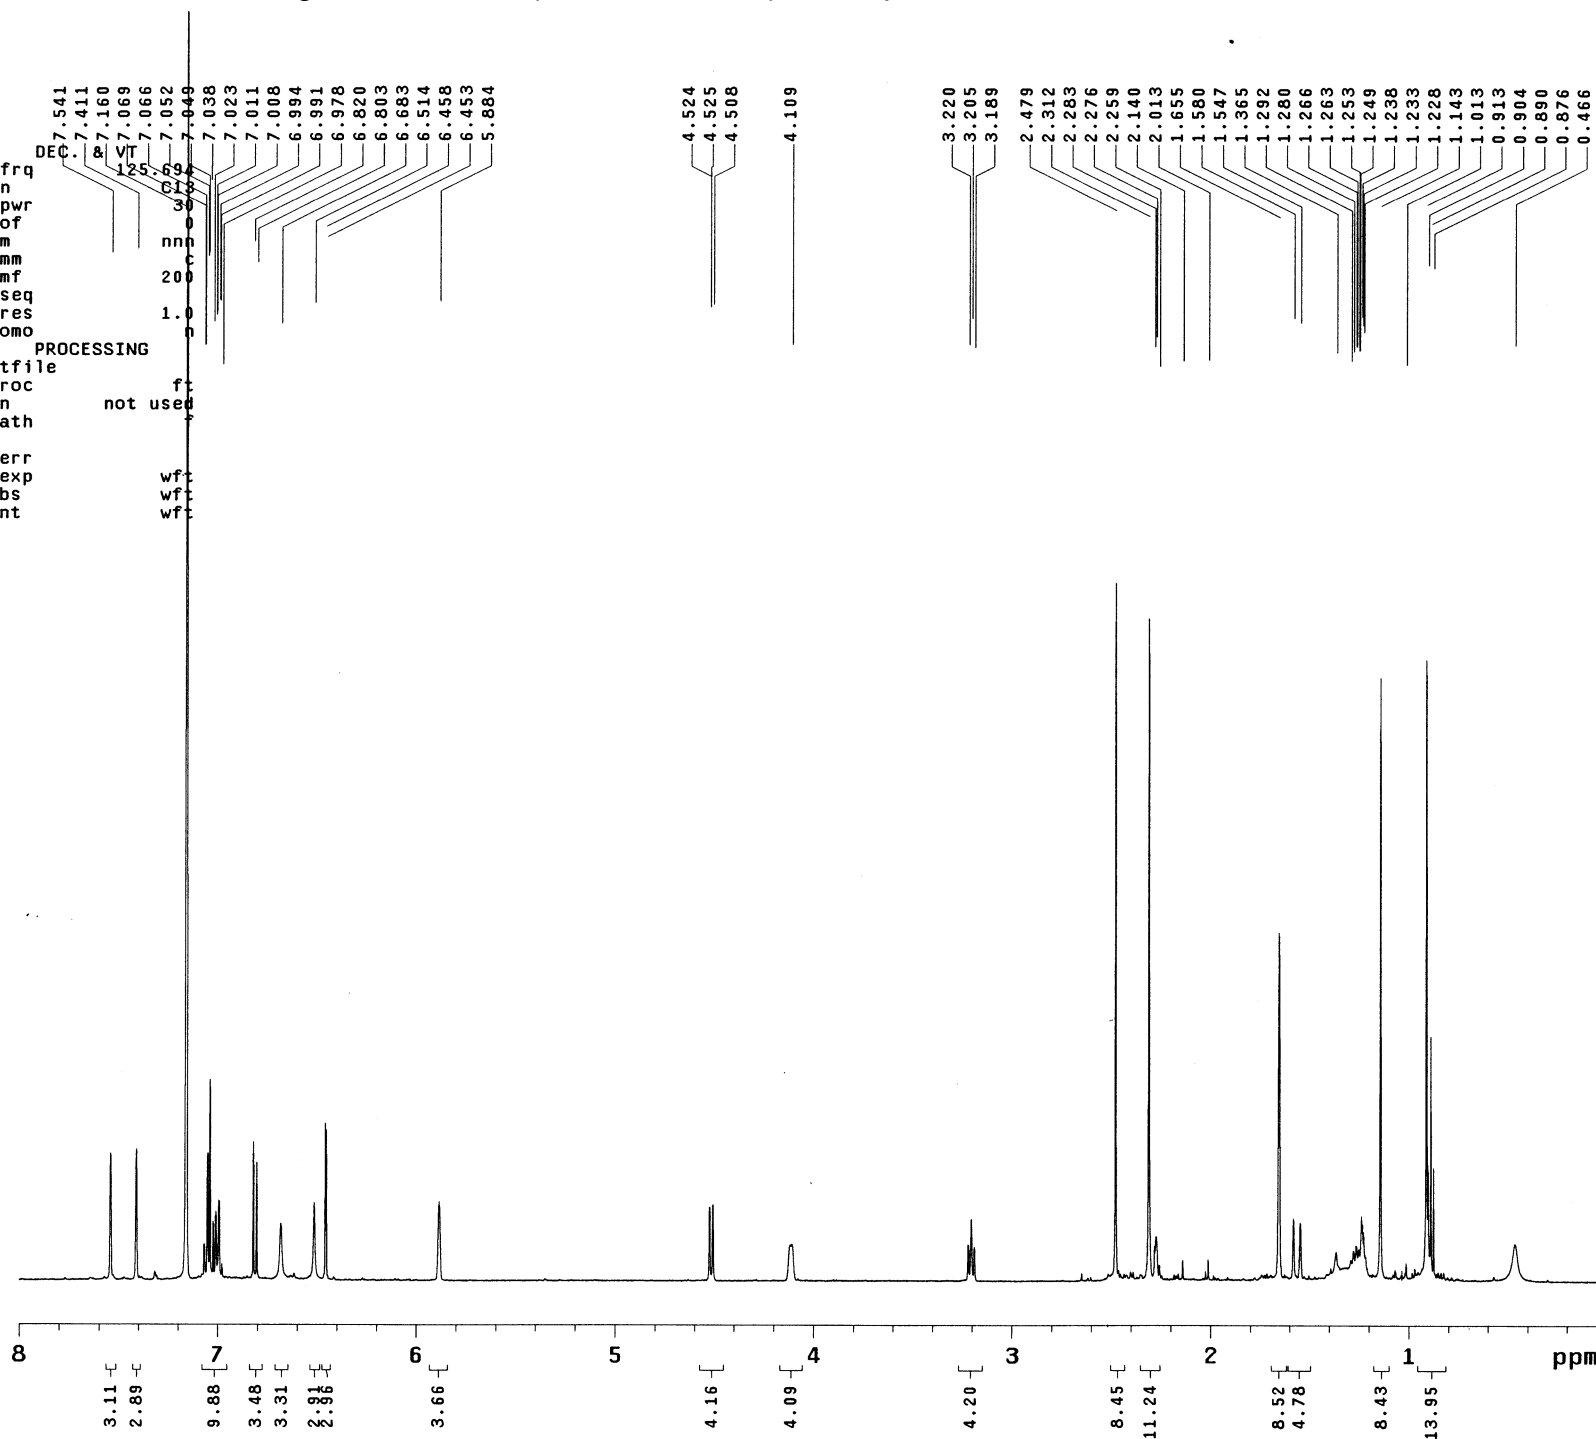



NSD-10-026  
exp57 s2pu1

```

SAMPLE
date Jun 13 2014 dfrq
solvent Benzene dn
file /export/home/~ dpwr
vnmr1/vnmrsys/data~ dof
/NSD/NSD-10-026/ne~ dm
w/C13.fid dmm
ACQUISITION dmf
sfrq 125.696 dseq
tn C13 dres
at 1.000 homo
np 60332
sw 30165.9 lb
fb not used wtfile
bs 4 proc
tpwr 58 fn
pw 4.8 math
d1 1.000
tof 1883.7 werr
nt 8000 wexp
ct 8000 wbs
alock y wnt
gain not used

FLAGS
il n
in n
dp y
hs nn

DISPLAY
sp -0.2
wp 20108.9
vs 800
sc 0
wc 210
hzmm 95.76
is 33.57
rfl 17334.3
rfp 16136.4
th 22
ins 100.000
nm cdc ph

```

```

DEC.
146.112
139.568
135.521
130.075
129.251
128.928
128.683
128.584
128.496
128.390
128.302
128.196
125.555
124.493
124.380
122.647
122.633
120.314
119.436
119.135
118.919
112.107
111.635

```

```

PROCESSING
lb 1.00
ft
131072
f
wft
wft
wft

```

— 62.288

41.790  
39.138  
38.069  
34.047  
29.854  
29.532  
24.529  
22.203  
22.057

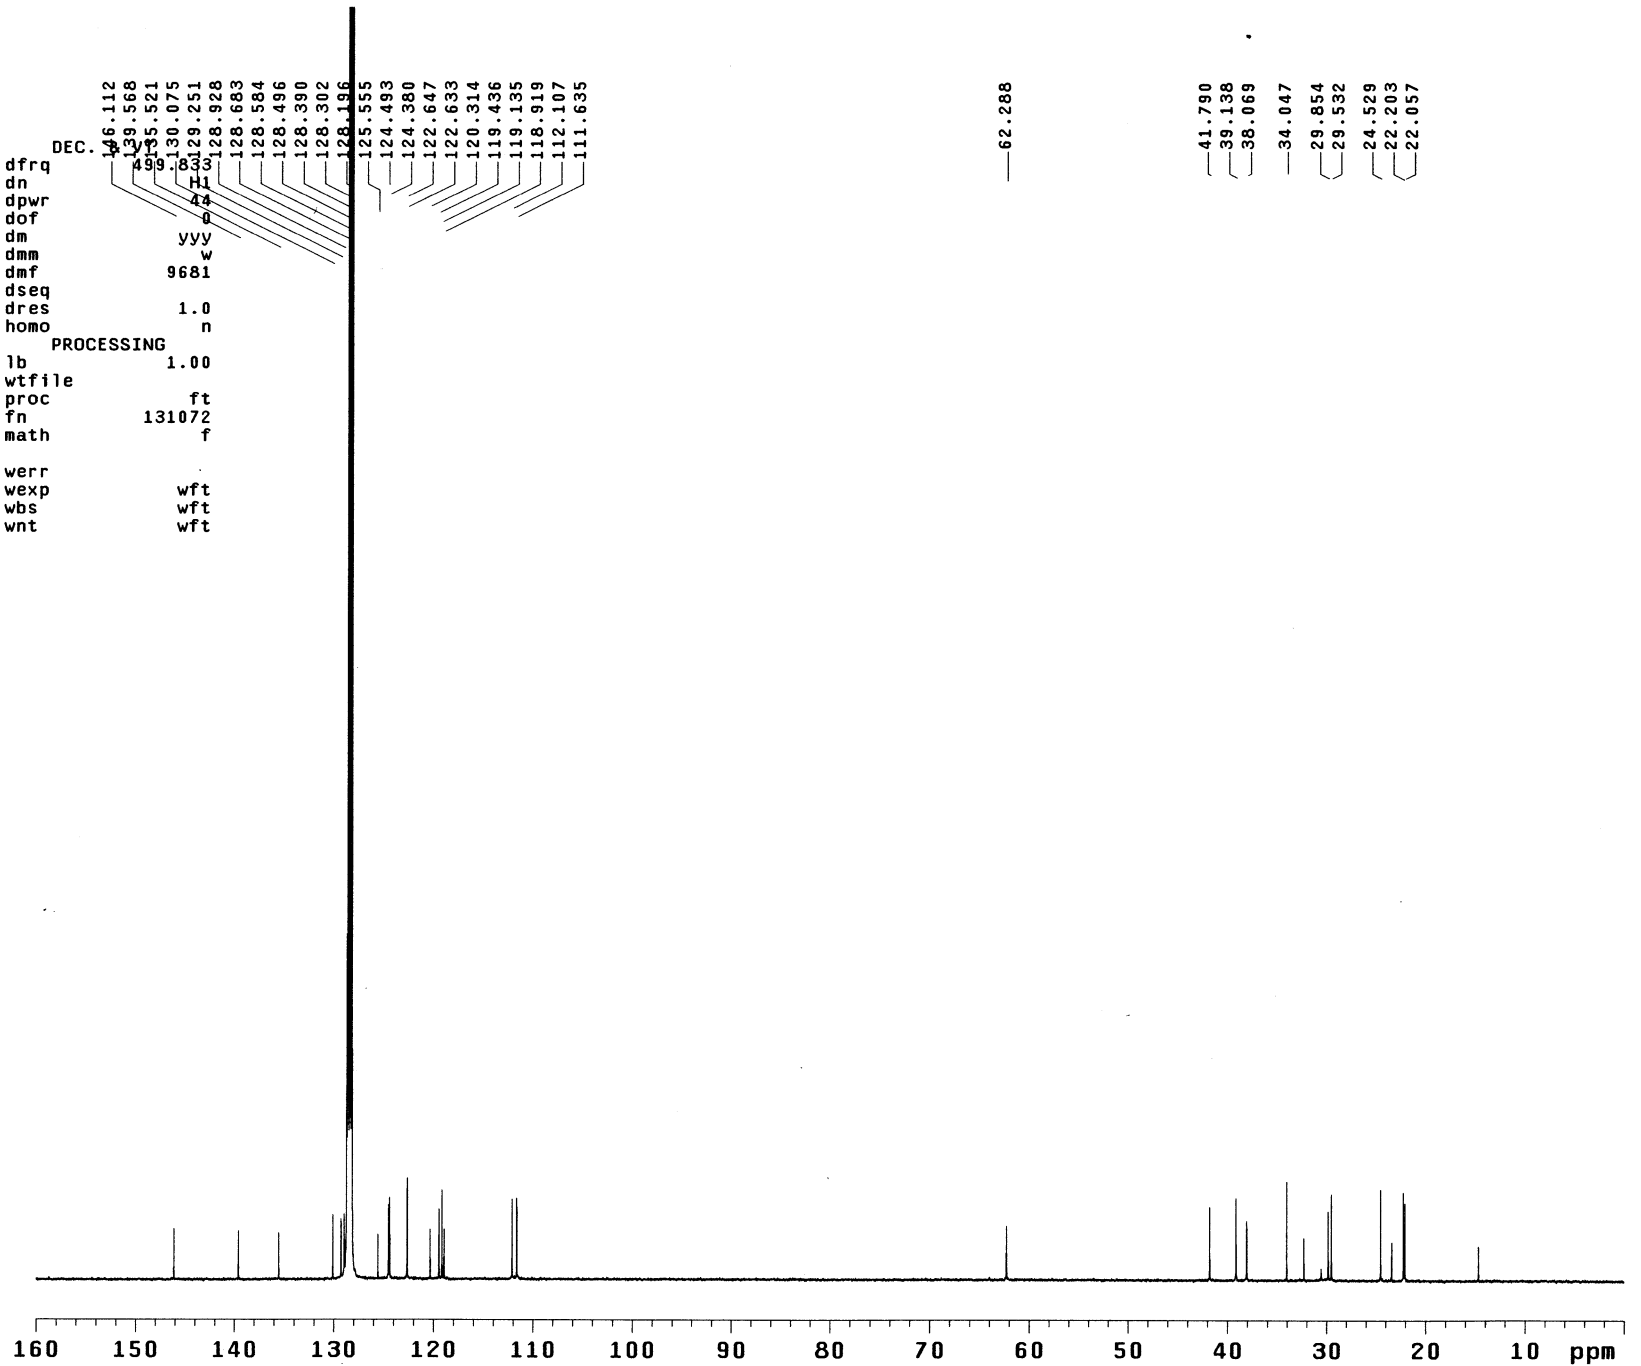

Fig S57. <sup>13</sup>C NMR (C<sub>6</sub>D<sub>6</sub>, 125 MHz) of compound 1c.

Fig S58. DEPT of compound 1c.

NSD-10-026

exp42 DEPT

| SAMPLE      |             | DEPT          | ACQUISITION | ARRAYS |
|-------------|-------------|---------------|-------------|--------|
| date        | Jun 13 2014 | j1xh 140.0    | array       | mult   |
| solvent     | Benzene     | mult arrayed  | arraydim    | 3      |
| sample      | undefined   | SPECIAL       |             |        |
| ACQUISITION |             | temp not used | i           | mult   |
| sw          | 30165.9     | gain 30       | 1           | 0.5    |
| at          | 1.000       | spin 0        | 2           | 1      |
| np          | 60332       | PROCESSING    | 3           | 1.5    |
| bs          | 4           | lb 1.00       |             |        |
| ss          | -4          | fn 131072     |             |        |
| d1          | 1.000       | SPECTRUM      |             |        |
| nt          | 4000        | wp 20108.9    |             |        |
| ct          | 4000        | sp -0.2       |             |        |
| TRANSMITTER |             | rp -145.5     |             |        |
| tn          | C13         | lp 232.8      |             |        |
| tof         | 1883.7      | ai cdc ph     |             |        |
| tpwr        | 58          | REFERENCE     |             |        |
| pw          | 13.800      | rfl 1197.9    |             |        |
| DECOUPLER   |             | rfp 0         |             |        |
| dn          | H1          | PLOT          |             |        |
| dof         | 0           | wc 210        |             |        |
| dpwr        | 44          | sc 0          |             |        |
| dm          | nny         | vs 600        |             |        |
| dmm         | ccw         | hzmm 95.76    |             |        |
| dmf         | 9681        | th 7          |             |        |
| pp1v1       | 61          |               |             |        |
| pp          | 14.800      |               |             |        |

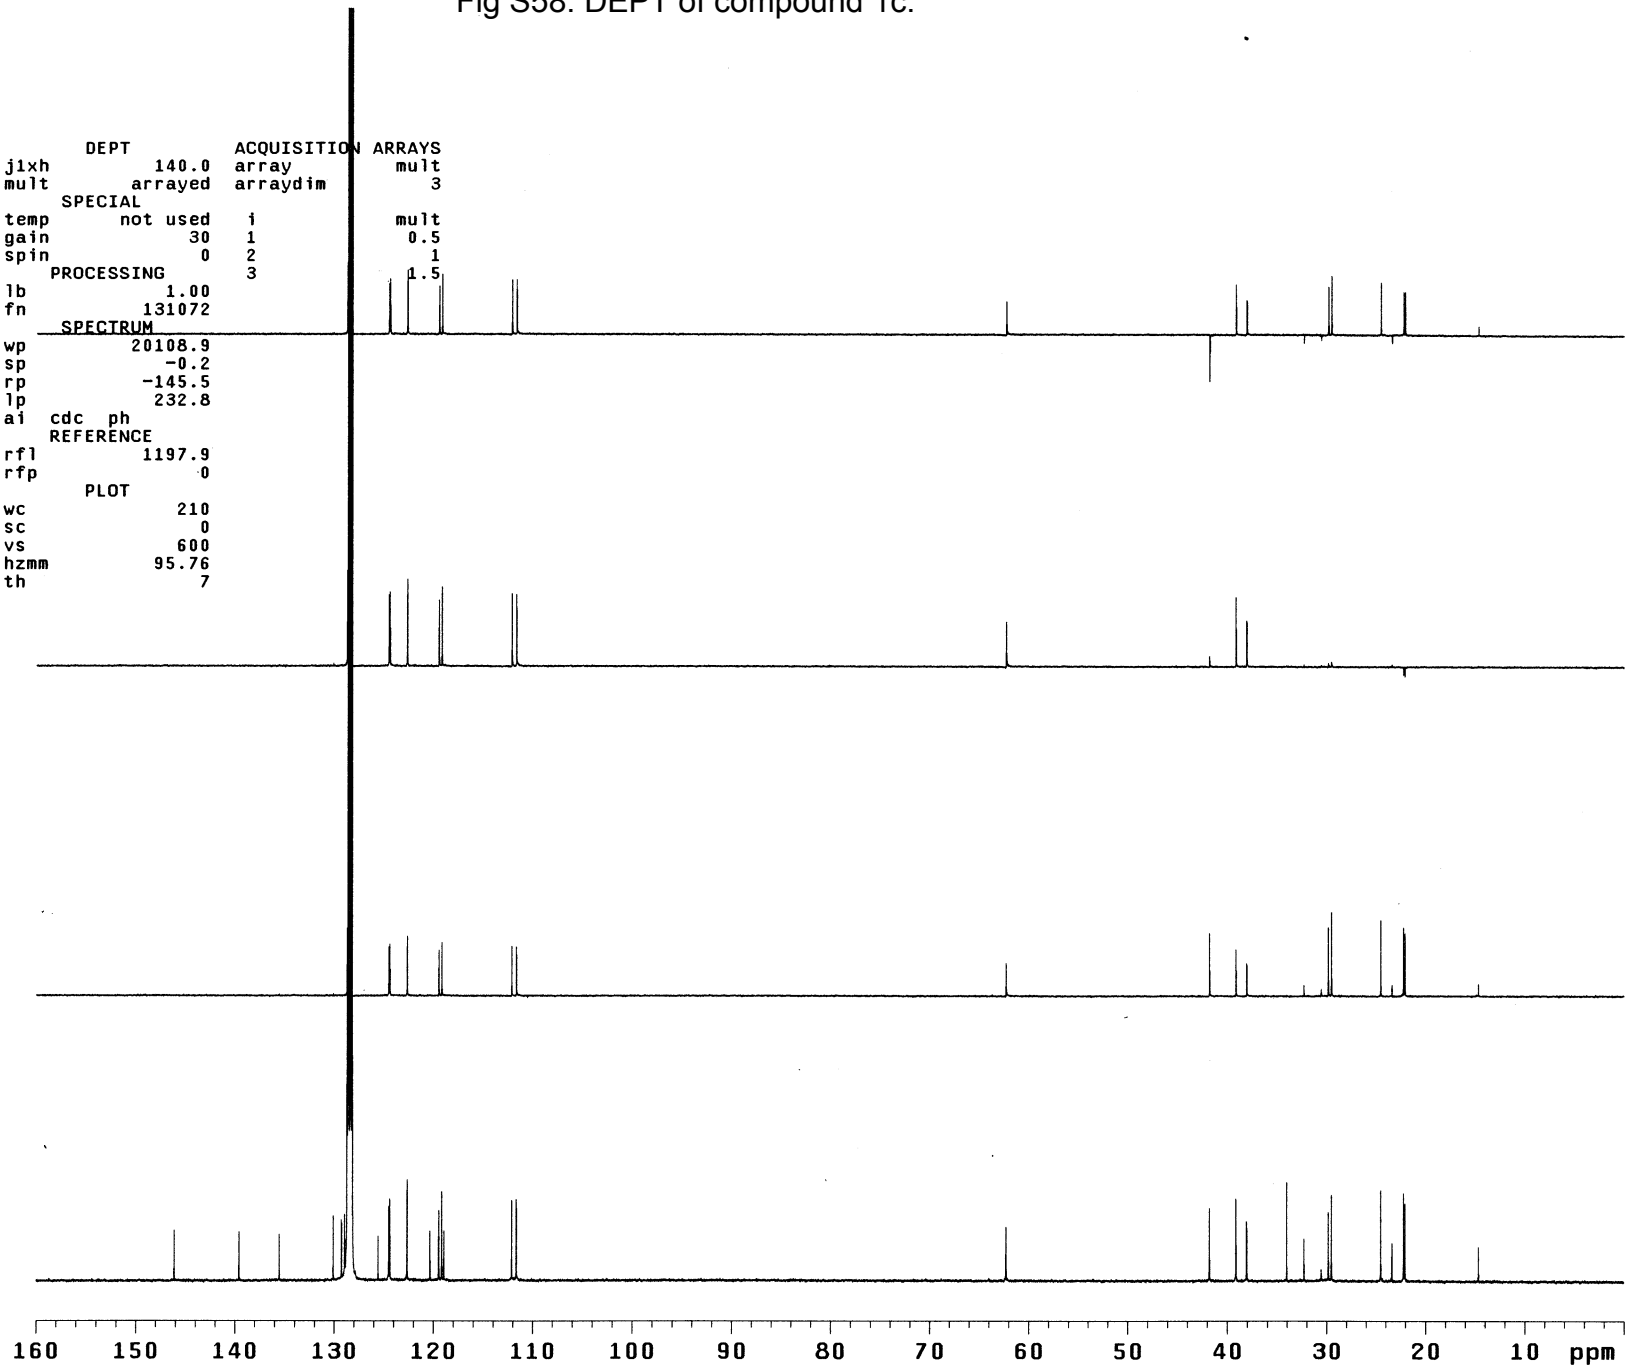

Fig S59. HSQC of compound 1c.

NSD-10-026

exp45 gHSQC

| SAMPLE           | FLAGS         | ACQUISITION | ARRAYS |
|------------------|---------------|-------------|--------|
| date Jun 13 2014 | hs            | n           | phase  |
| solvent Benzene  | sspul         | array       | 256    |
| sample undefined | PFGflg        | arraydim    |        |
| ACQUISITION      | hsglv1        | 1009        | phase  |
| sw 4001.6        | SPECIAL       | i           | 1      |
| at 0.128         | temp          | not used    | 2      |
| np 1024          | gain          | 50          |        |
| fb not used      | spin          | 0           |        |
| ss 32            | GRADIENTS     |             |        |
| d1 1.000         | gzlv11        | 1009        |        |
| nt 8             | gt1           | 0.002000    |        |
| 2D ACQUISITION   | gzlv13        | 507         |        |
| sw1 21367.5      | gt3           | 0.001000    |        |
| ni 128           | gstab         | 0.000500    |        |
| phase arrayed    | F2 PROCESSING |             |        |
| TRANSMITTER      | gf            | 0.059       |        |
| tn H1            | gfs           | not used    |        |
| sfrq 499.832     | fn            | 1024        |        |
| tof -500.0       | F1 PROCESSING |             |        |
| tpwr 61          | gf1           | 0.006       |        |
| pw 13.900        | gfs1          | not used    |        |
| DECOUPLER        | proc1         | 1p          |        |
| dn C13           | fn1           | 2048        |        |
| dof -2515.1      | DISPLAY       |             |        |
| dm nny           | sp            | 366.0       |        |
| dmm ccp          | wp            | 3485.8      |        |
| dmf 32258        | sp1           | 2509.9      |        |
| dpwr 42          | wp1           | 13939.0     |        |
| pwxlvl 60        | rfl           | 2926.7      |        |
| pxw 10.700       | rfl1          | 2941.0      |        |
| HSQC             | rfl1          | 16836.7     |        |
| j1xh 140.0       | rfpl          | 15632.4     |        |
| nullflg y        | PLOT          |             |        |
| mult 2           | wc            | 150.0       |        |
|                  | sc            | 6.2         |        |
|                  | wc2           | 116.2       |        |
|                  | sc2           | 0           |        |
|                  | vs            | 60          |        |
|                  | th            | 6           |        |
|                  | ai            | cdc         | ph     |

F2  
(ppm)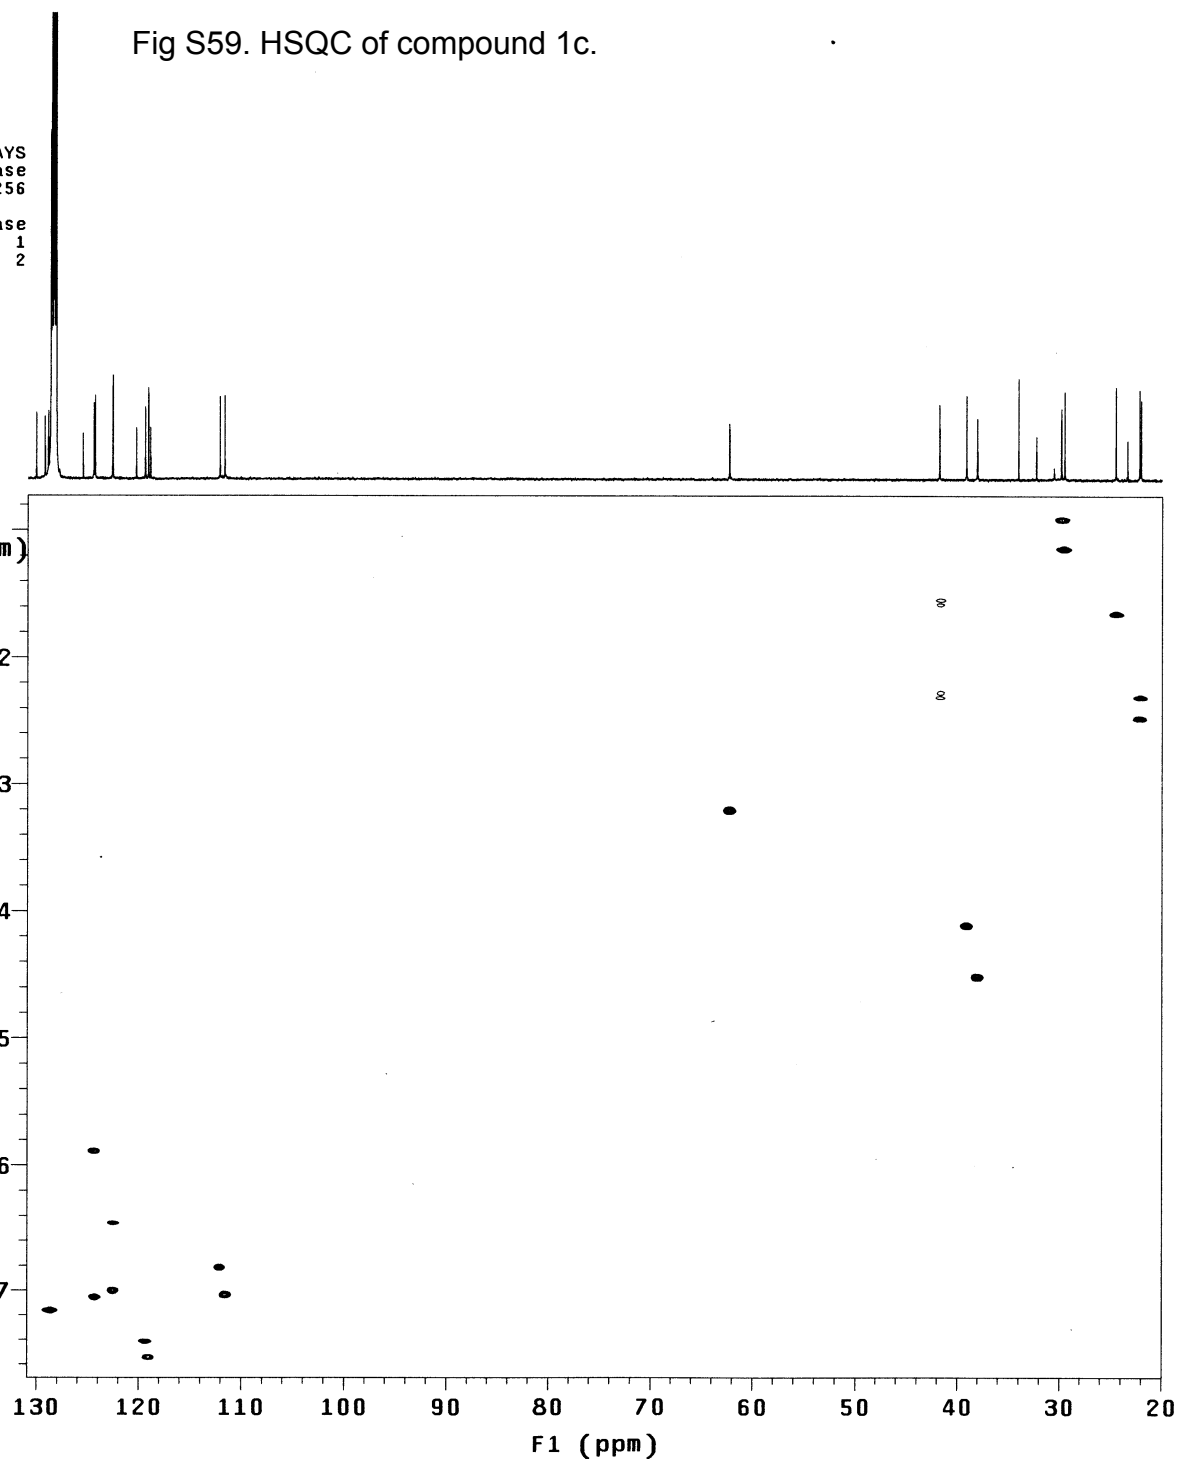

F1 (ppm)

Fig S60. COSY of compound 1c.

NSD-10-026

exp43 gCOSY

|                |             |               |          |
|----------------|-------------|---------------|----------|
| SAMPLE         |             | FLAGS         | nn       |
| date           | Jun 13 2014 | hs            | n        |
| solvent        | Benzene     | sspul         | 1009     |
| sample         | undefined   | hsglv         |          |
| ACQUISITION    |             | SPECIAL       |          |
| sw             | 4001.6      | temp          | not used |
| at             | 0.128       | gain          | 30       |
| np             | 1024        | spin          | 0        |
| fb             | not used    | F2 PROCESSING |          |
| ss             | 16          | sb            | -0.064   |
| d1             | 1.000       | sbs           | not used |
| nt             | 8           | fn            | 1024     |
| 2D ACQUISITION |             | F1 PROCESSING |          |
| sw1            | 4001.6      | sb1           | -0.032   |
| ni             | 128         | sbs1          | not used |
| TRANSMITTER    |             | procl         | lp       |
| tn             | H1          | fn1           | 1024     |
| sfrq           | 499.832     | DISPLAY       |          |
| tof            | -500.0      | sp            | 139.8    |
| tpwr           | 61          | wp            | 3774.9   |
| pw             | 13.900      | sp1           | 140.5    |
| GRADIENTS      |             | wp1           | 3774.9   |
| gzlv11         | 1009        | rfl           | 2926.3   |
| gt1            | 0.001000    | rfl1          | 2941.0   |
| gstab          | 0.000500    | rfl1          | 2925.6   |
| DECOUPLER      |             | rfl1          | 2941.0   |
| dn             | C13         | PLOT          |          |
| dm             | nnn         | wc            | 155.0    |
|                |             | sc            | 10.0     |
|                |             | wc2           | 155.0    |
|                |             | sc2           | 0        |
|                |             | vs            | 60       |
|                |             | th            | 6        |
|                |             | ai            | cdc av   |

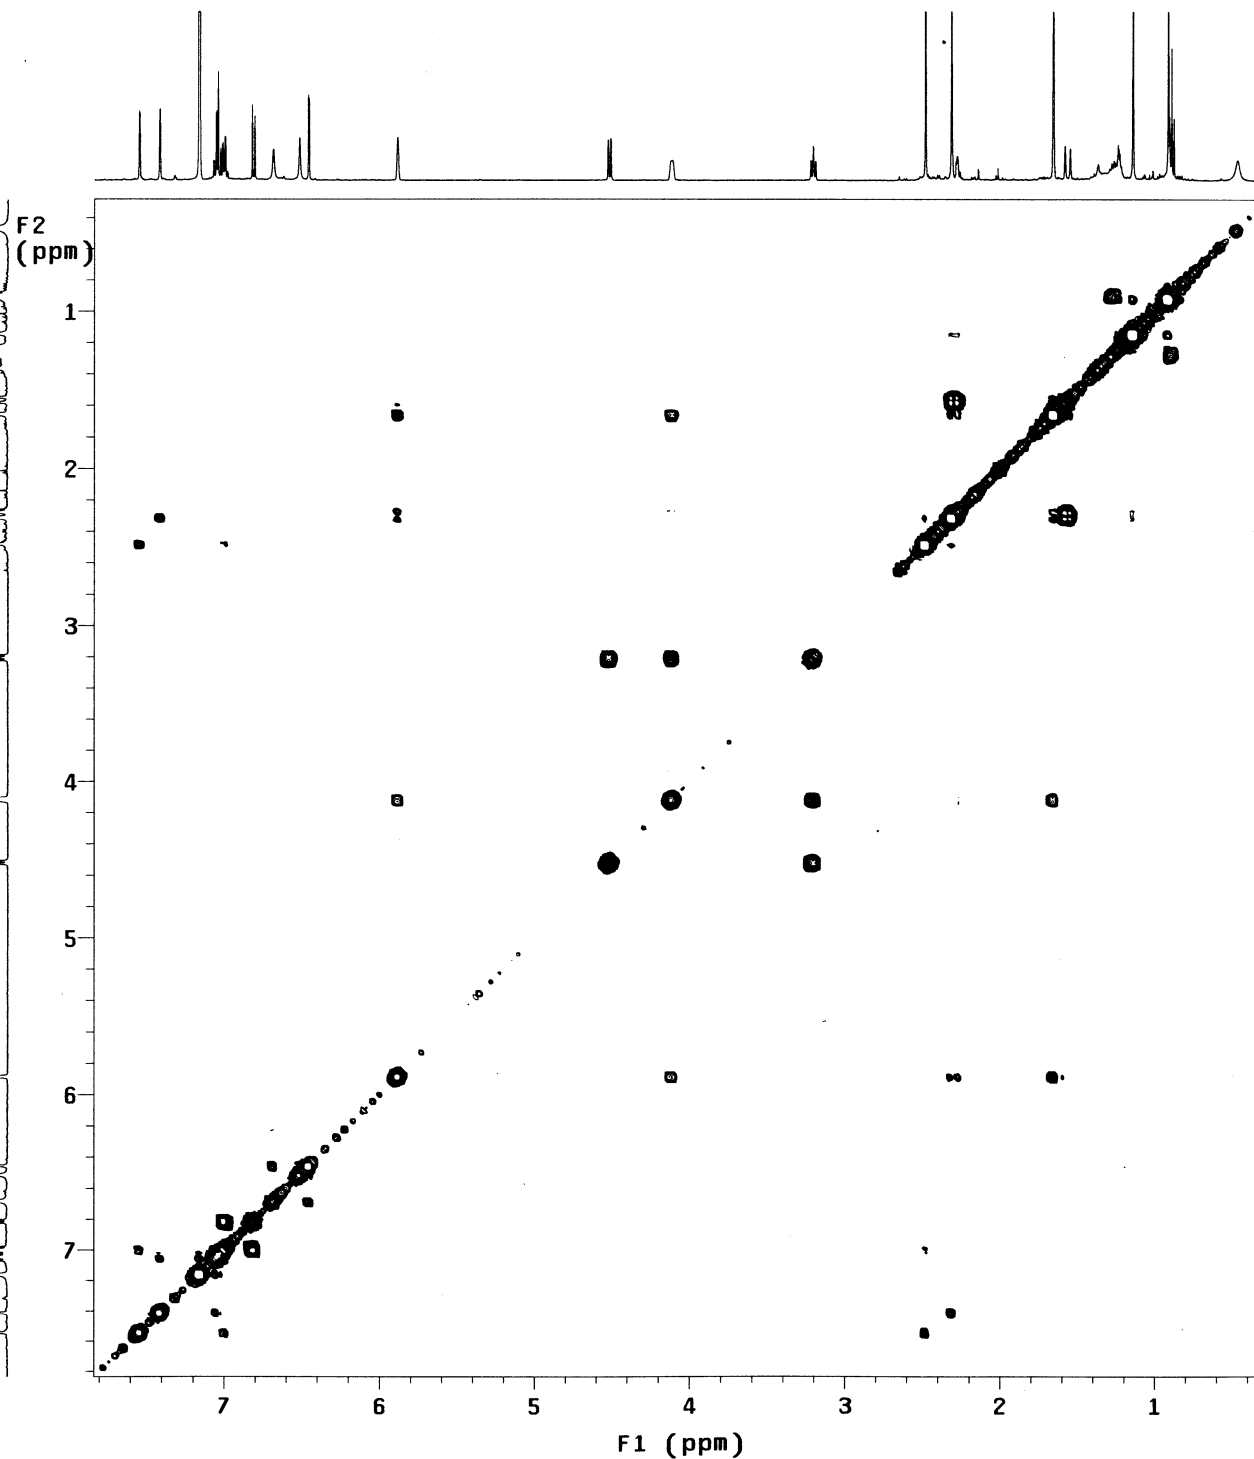

Fig S61. NOESY of compound 1c.

NSD-10-026

exp44 NOESY

|                |             |               |          |
|----------------|-------------|---------------|----------|
| SAMPLE         |             | FLAGS         | n        |
| date           | Jun 13 2014 | hs            | y        |
| solvent        | Benzene     | sspul         | y        |
| sample         | undefined   | PFgflg        | y        |
| ACQUISITION    |             | hsglv1        | 1009     |
| sw             | 4001.6      | SPECIAL       |          |
| at             | 0.128       | temp          | not used |
| np             | 1024        | gain          | 30       |
| fb             | not used    | spin          | 0        |
| ss             | 32          | F2 PROCESSING |          |
| d1             | 1.000       | gf            | 0.059    |
| nt             | 16          | gfs           | not used |
| 2D ACQUISITION |             | fn            | 1024     |
| sw1            | 4001.6      | F1 PROCESSING |          |
| ni             | 200         | gf1           | 0.046    |
| TRANSMITTER    |             | gfs1          | not used |
| tn             | H1          | proc1         | 1p       |
| sfrq           | 499.832     | fn1           | 1024     |
| tof            | -500.0      | DISPLAY       |          |
| tpwr           | 61          | sp            | 171.1    |
| pw             | 13.900      | wp            | 3720.2   |
| NOESY          |             | sp1           | 172.1    |
| mix            | 0.600       | wp1           | 3712.4   |
| PRESATURATION  |             | rfl           | 2926.2   |
| satmode        | nnnn        | rfp           | 2941.0   |
| satpwr         | 0           | rfl1          | 2925.2   |
| satdly         | 0           | rfp1          | 2941.0   |
| satfrq         | 0           | PLOT          |          |
| DECOUPLER      |             | wc            | 155.0    |
| dn             | C13         | sc            | 10.0     |
| dm             | nnn         | wc2           | 155.0    |
|                |             | sc2           | 0        |
|                |             | vs            | 60       |
|                |             | th            | 1        |
|                |             | ai            | ph       |

F2 (ppm)

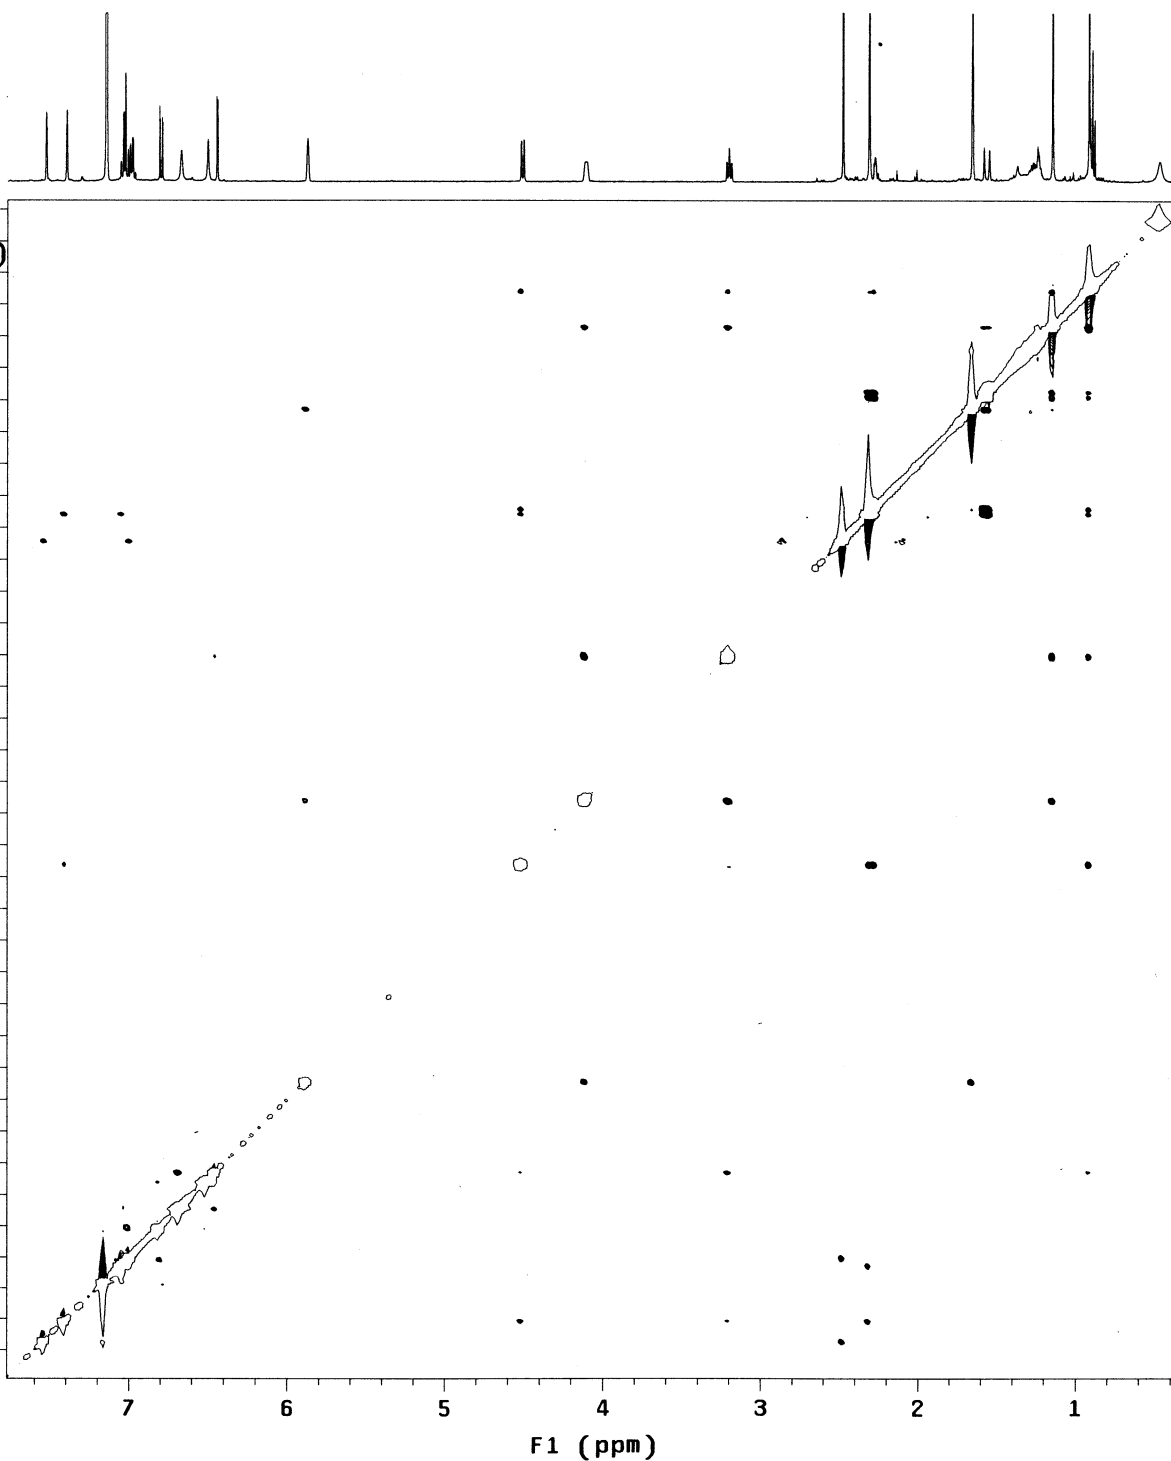

F1 (ppm)

### D-2000 Elite HPLC System Manager Report

Analyzed Date and Time: 2014/02/28 05:28 下午  
 Reported Date and Time: 2014/03/05 06:46 下午

Processed Date and Time: 2014/03/05 06:45 下午

Data Path: D:\NITIN\DATA\0079\

Processing Method: test-IPA/Hx-3

System (acquisition): Sys 1 Series: 0079  
 Application(data): NITIN Vial Number: 1  
 Sample Name: NSD-09-183 (Racemic) Vial Type: UNK  
 Injection from this vial: 1 of 1 Volume: 20.0 ul  
 Sample Description: 5%IPA+HX 1mL/MIN COL-IC

Chrom Type: Fixed WL Chromatogram, 280 nm

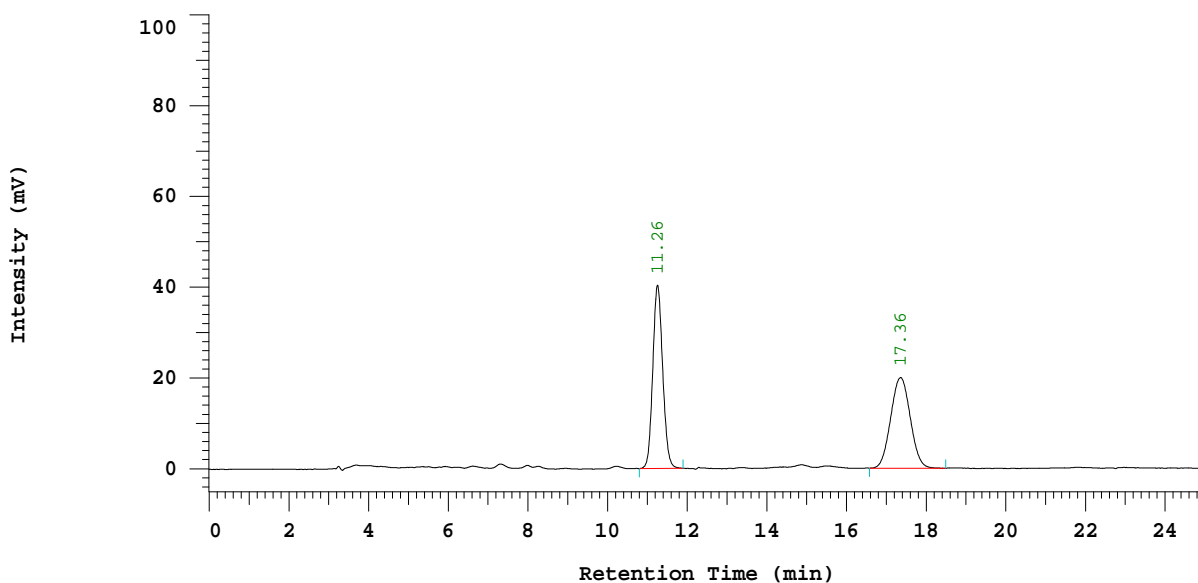

Processing Method: test-IPA/Hx-3

Column Type: IC

Method Developer: NITIN

Method Description:

Chrom Type: Fixed WL Chromatogram, 280 nm

Peak Quantitation: AREA

Calculation Method: EXT-STD

Scale Factor 1: 1.000

| No. | RT    | Area    | Height | Area %  |
|-----|-------|---------|--------|---------|
| 1   | 11.26 | 692724  | 40304  | 50.611  |
| 2   | 17.36 | 676005  | 19959  | 49.389  |
|     |       | 1368729 | 60263  | 100.000 |

Peak rejection level: 200000

Fig S62. HPLC analysis of the racemic compound 4a, for comparison in Table 1.

### D-2000 Elite HPLC System Manager Report

Analyzed Date and Time: 2013/09/17 01:16 下午  
 Reported Date and Time: 2013/09/17 02:54 下午

Processed Date and Time: 2013/09/17 02:52 下午

Data Path: D:\NITIN\DATA\0016\

Processing Method: Test-IPA/Hx-1

System (acquisition): Sys 1 Series: 0016  
 Application(data): NITIN Vial Number: 1  
 Sample Name: NSD-09-96 (Takemoto-NH2) Vial Type: UNK  
 Injection from this vial: 1 of 1 Volume: 20.0 ul  
 Sample Description: 5%IPA+HX 1mL/MIN COL-IC

Chrom Type: Fixed WL Chromatogram, 275 nm

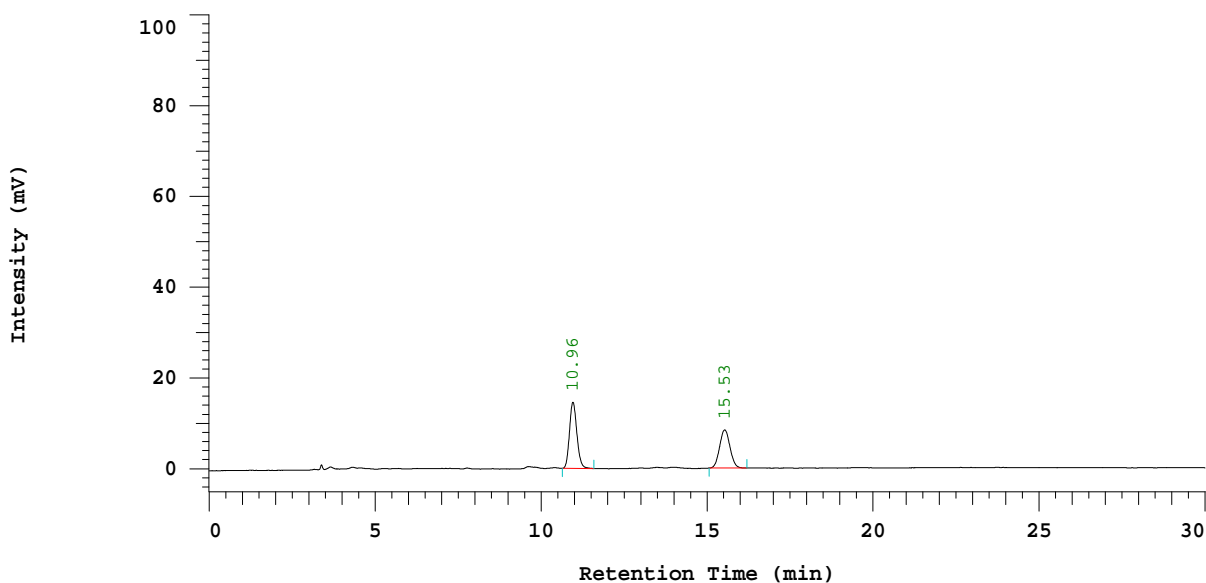

Processing Method: Test-IPA/Hx-1

Column Type: IC

Method Developer: NSD

Method Description:

Chrom Type: Fixed WL Chromatogram, 275 nm

Peak Quantitation: AREA

Calculation Method: EXT-STD

Scale Factor 1: 1.000

| No. | RT    | Area   | Height | Area %  |
|-----|-------|--------|--------|---------|
| 1   | 10.96 | 223804 | 14601  | 55.473  |
| 2   | 15.53 | 179641 | 8373   | 44.527  |
|     |       | 403445 | 22974  | 100.000 |

Peak rejection level: 100000

Fig S63. HPLC analysis of the compound 4a (Table 1, entry 1)

### D-2000 Elite HPLC System Manager Report

Analyzed Date and Time: 2013/09/19 02:34 下午  
 Reported Date and Time: 2013/09/19 03:26 下午

Processed Date and Time: 2013/09/19 03:25 下午

Data Path: D:\NITIN\DATA\0017\

Processing Method: Test-IPA/Hx-1

System (acquisition): Sys 1 Series: 0017  
 Application(data): NITIN Vial Number: 1  
 Sample Name: NSD-09-97 (Quinidine-NH2) Vial Type: UNK  
 Injection from this vial: 1 of 1 Volume: 20.0 ul  
 Sample Description: 5%IPA+HX 1mL/MIN COL-IC

Chrom Type: Fixed WL Chromatogram, 275 nm

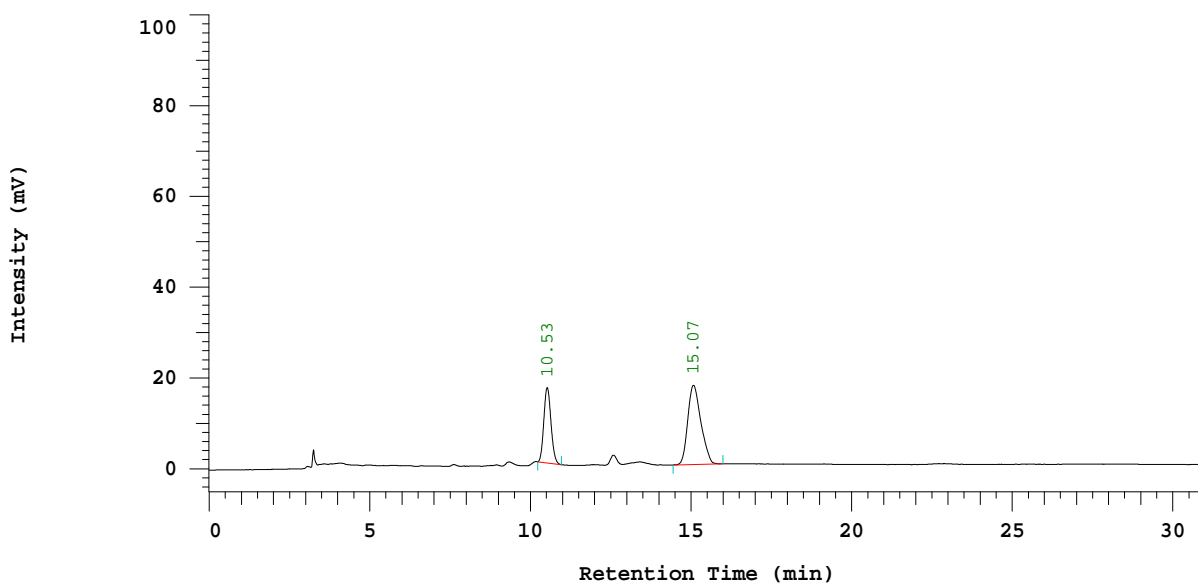

Processing Method: Test-IPA/Hx-1

Column Type: IC

Method Developer: NSD

Method Description:

Chrom Type: Fixed WL Chromatogram, 275 nm

Peak Quantitation: AREA

Calculation Method: EXT-STD

Scale Factor 1: 1.000

| No. | RT    | Area   | Height | Area %  |
|-----|-------|--------|--------|---------|
| 1   | 10.53 | 253164 | 16569  | 34.057  |
| 2   | 15.07 | 490194 | 17416  | 65.943  |
|     |       | 743358 | 33985  | 100.000 |

Peak rejection level: 200000

Fig S64. HPLC analysis of the compound 4a (Table 1, entry 3)



### D-2000 Elite HPLC System Manager Report

Analyzed Date and Time: 2013/09/13 11:37 上午  
 Reported Date and Time: 2013/09/13 01:51 下午

Processed Date and Time: 2013/09/13 01:50 下午

Data Path: D:\NITIN\DATA\0015\

Processing Method: Test-IPA/Hx-1

System (acquisition): Sys 1 Series: 0015  
 Application(data): NITIN Vial Number: 1  
 Sample Name: NSD-09-94 (Hydroquinine-NH2) Vial Type: UNK  
 Volume: 20.0 ul

Injection from this vial: 1 of 1  
 Sample Description: 5%IPA+HX 1mL/MIN COL-IC

Chrom Type: Fixed WL Chromatogram, 275 nm

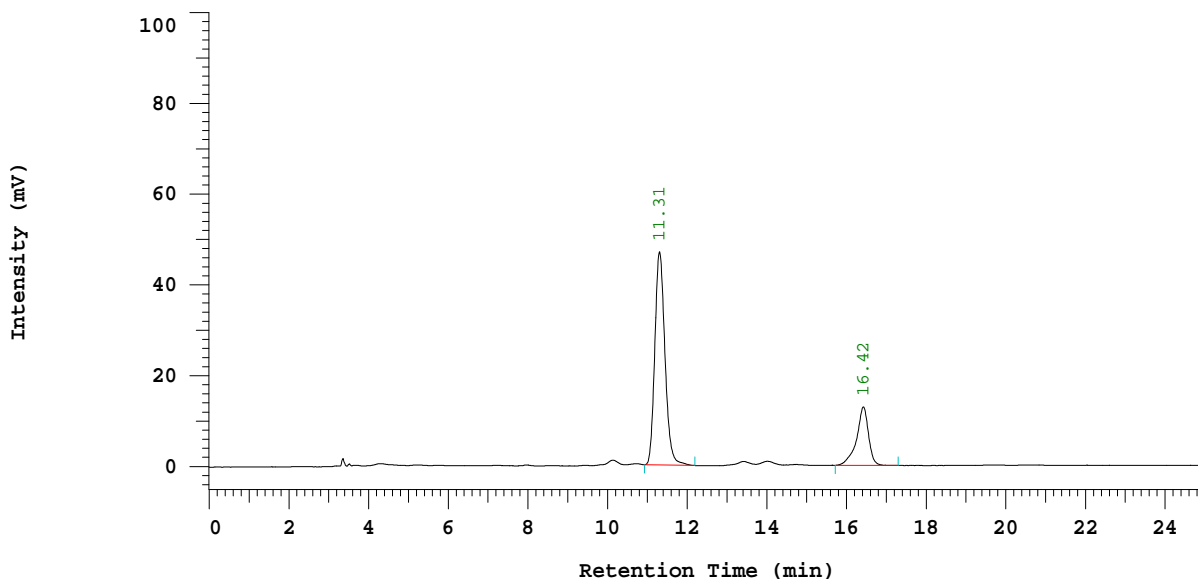

Processing Method: Test-IPA/Hx-1  
 Column Type: IC Method Developer: NSD  
 Method Description:

Chrom Type: Fixed WL Chromatogram, 275 nm

Peak Quantitation: AREA  
 Calculation Method: EXT-STD  
 Scale Factor 1: 1.000

| No. | RT    | Area    | Height | Area %  |
|-----|-------|---------|--------|---------|
| 1   | 11.31 | 824163  | 46937  | 75.636  |
| 2   | 16.42 | 265476  | 12857  | 24.364  |
|     |       | 1089639 | 59794  | 100.000 |

Peak rejection level: 200000

Fig S65. HPLC analysis of the compound 4a (Table 1, entry 4)

### D-2000 Elite HPLC System Manager Report

Analyzed Date and Time: 2013/11/19 10:44 上午  
 Reported Date and Time: 2013/11/19 11:18 上午

Processed Date and Time: 2013/11/19 11:16 上午

Data Path: D:\NITIN\DATA\0038\

Processing Method: Test-IPA/Hx-1

System (acquisition): Sys 1 Series: 0038  
 Application(data): NITIN Vial Number: 1  
 Sample Name: NSD-09-128(DHQ-TCA-CH2Cl2) Vial Type: UNK  
 Injection from this vial: 1 of 1 Volume: 20.0 ul  
 Sample Description: 5%IPA+HX 1mL/MIN COL-IC

Chrom Type: Fixed WL Chromatogram, 275 nm

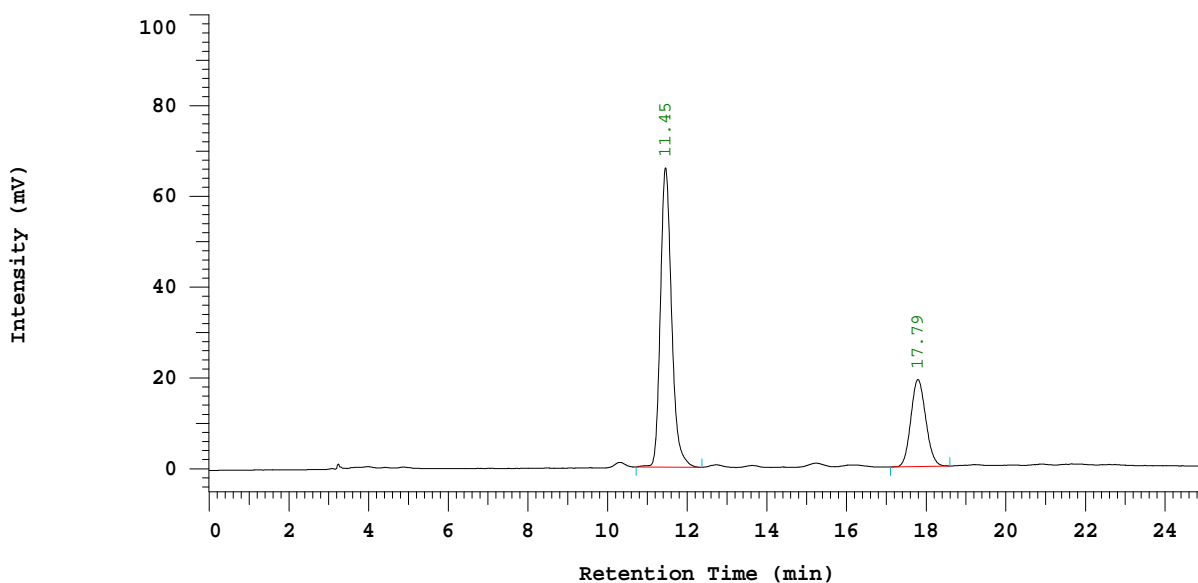

Processing Method: Test-IPA/Hx-1

Column Type: IC

Method Developer: NSD

Method Description:

Chrom Type: Fixed WL Chromatogram, 275 nm

Peak Quantitation: AREA

Calculation Method: EXT-STD

Scale Factor 1: 1.000

| No. | RT    | Area    | Height | Area %  |
|-----|-------|---------|--------|---------|
| 1   | 11.45 | 1274655 | 65882  | 72.027  |
| 2   | 17.79 | 495024  | 19129  | 27.973  |
|     |       | 1769679 | 85011  | 100.000 |

Peak rejection level: 200000

Fig S66. HPLC analysis of the compound 4a (Table 1, entry 6)

### D-2000 Elite HPLC System Manager Report

Analyzed Date and Time: 2013/11/06 01:17 下午  
 Reported Date and Time: 2013/11/06 12:50 下午

Processed Date and Time: 2013/11/06 12:50 下午

Data Path: D:\NITIN\DATA\0035\

Processing Method: Test-IPA/Hx-1

System (acquisition): Sys 1

Series: 0035

Application(data): NITIN

Vial Number: 1

Sample Name: NSD-09-119(DHQ-PentFBA-CH2Cl2)

Vial Type: UNK

Volume: 20.0 ul

Injection from this vial: 1 of 1

Sample Description: 5%IPA+HX 1mL/MIN COL-IC

Chrom Type: Fixed WL Chromatogram, 275 nm

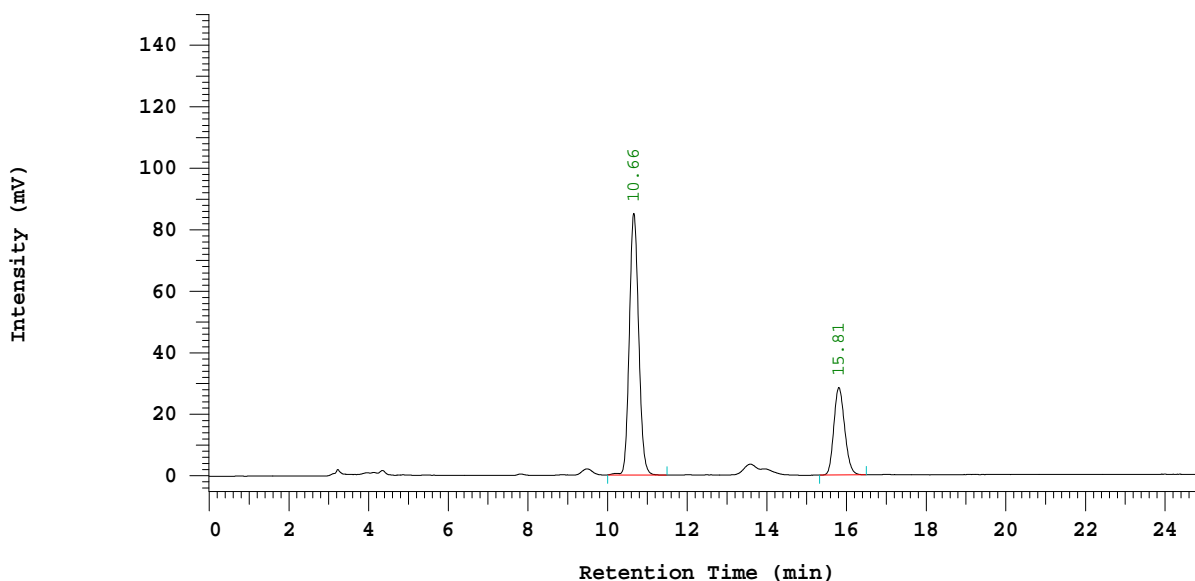

Processing Method: Test-IPA/Hx-1

Column Type: IC

Method Developer: NSD

Method Description:

Chrom Type: Fixed WL Chromatogram, 275 nm

Peak Quantitation: AREA

Calculation Method: EXT-STD

Scale Factor 1: 1.000

| No. | RT    | Area    | Height | Area %  |
|-----|-------|---------|--------|---------|
| 1   | 10.66 | 1374364 | 85043  | 71.975  |
| 2   | 15.81 | 535137  | 28438  | 28.025  |
|     |       | 1909501 | 113481 | 100.000 |

Peak rejection level: 200000

Fig S67. HPLC analysis of the compound 4a (Table 1, entry 10)

### D-2000 Elite HPLC System Manager Report

Analyzed Date and Time: 2013/11/06 12:47 下午  
 Reported Date and Time: 2013/11/06 12:47 下午

Processed Date and Time: 2013/11/06 12:47 下午

Data Path: D:\NITIN\DATA\0034\

Processing Method: Test-IPA/Hx-1

System (acquisition): Sys 1 Series: 0034  
 Application(data): NITIN Vial Number: 1  
 Sample Name: NSD-09-118(DHQ-2-NBA-CH2Cl2) Vial Type: UNK  
 Volume: 20.0 ul

Injection from this vial: 1 of 1  
 Sample Description: 5%IPA+HX 1mL/MIN COL-IC

Chrom Type: Fixed WL Chromatogram, 275 nm

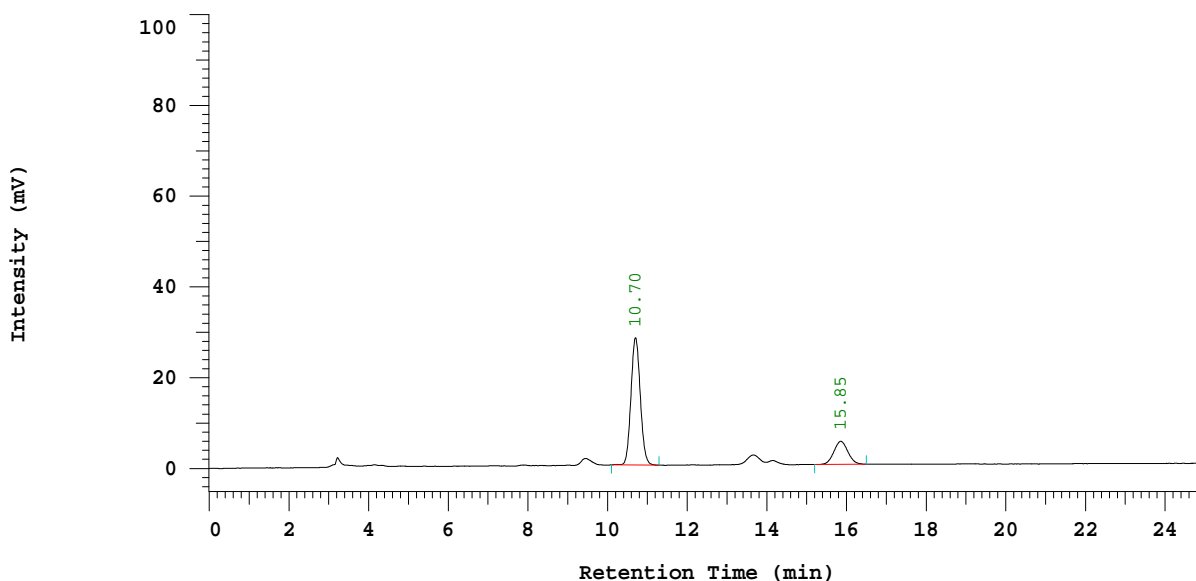

Processing Method: Test-IPA/Hx-1  
 Column Type: IC Method Developer: NSD  
 Method Description:

Chrom Type: Fixed WL Chromatogram, 275 nm

Peak Quantitation: AREA  
 Calculation Method: EXT-STD  
 Scale Factor 1: 1.000

| No. | RT    | Area   | Height | Area %  |
|-----|-------|--------|--------|---------|
| 1   | 10.70 | 453568 | 28017  | 78.770  |
| 2   | 15.85 | 122242 | 5060   | 21.230  |
|     |       | 575810 | 33077  | 100.000 |

Peak rejection level: 100000

Fig S68. HPLC analysis of the compound 4a (Table 1, entry 11)

### D-2000 Elite HPLC System Manager Report

Analyzed Date and Time: 2013/10/29 01:04 下午  
 Reported Date and Time: 2013/10/29 12:39 下午

Processed Date and Time: 2013/10/29 12:38 下午

Data Path: D:\NITIN\DATA\0033\

Processing Method: Test-IPA/Hx-1

System (acquisition): Sys 1 Series: 0033  
 Application(data): NITIN Vial Number: 1  
 Sample Name: NSD-09-115(DHQ-R-CSA-CH2Cl2) Vial Type: UNK  
 Volume: 20.0 ul

Injection from this vial: 1 of 1  
 Sample Description: 5%IPA+HX 1mL/MIN COL-IC

Chrom Type: Fixed WL Chromatogram, 275 nm

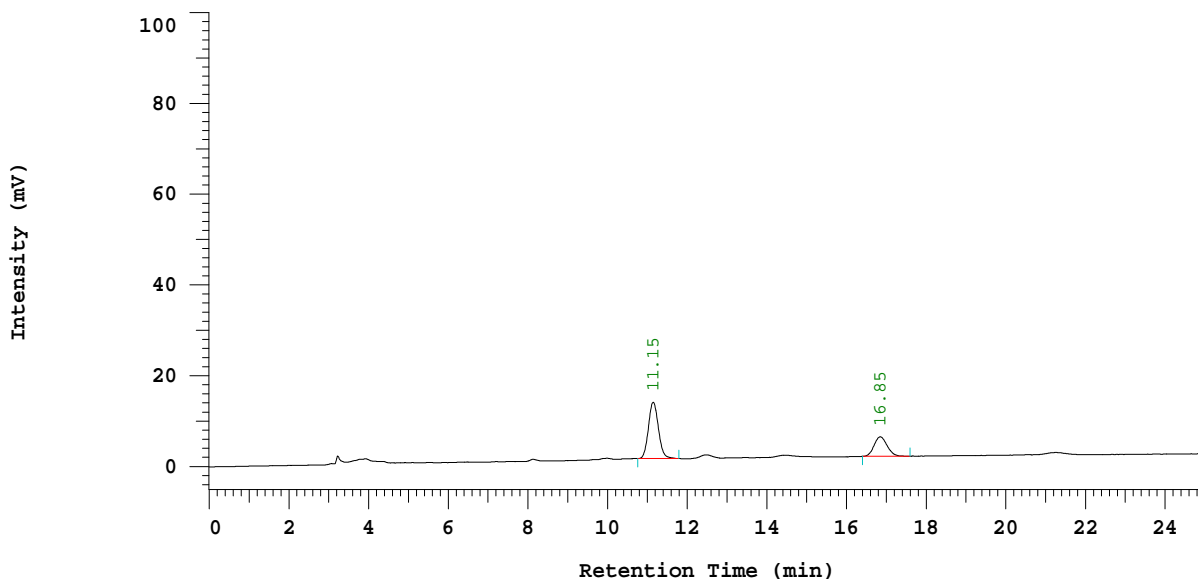

Processing Method: Test-IPA/Hx-1 Method Developer: NSD  
 Column Type: IC  
 Method Description:

Chrom Type: Fixed WL Chromatogram, 275 nm

Peak Quantitation: AREA  
 Calculation Method: EXT-STD  
 Scale Factor 1: 1.000

| No. | RT    | Area   | Height | Area %  |
|-----|-------|--------|--------|---------|
| 1   | 11.15 | 216958 | 12413  | 68.984  |
| 2   | 16.85 | 97547  | 4311   | 31.016  |
|     |       | 314505 | 16724  | 100.000 |

Peak rejection level: 50000

Fig S69. HPLC analysis of the compound 4a (Table 1, entry 14)

### D-2000 Elite HPLC System Manager Report

Analyzed Date and Time: 2013/10/23 11:07 上午  
 Reported Date and Time: 2013/10/23 11:57 上午

Processed Date and Time: 2013/10/23 11:57 上午

Data Path: D:\NITIN\DATA\0028\

Processing Method: Test-IPA/Hx-1

System (acquisition): Sys 1

Series: 0028

Application(data): NITIN

Vial Number: 1

Sample Name: NSD-09-114(DHQ-NH2-R-PACH2Cl2)

Vial Type: UNK

Volume: 20.0 ul

Injection from this vial: 1 of 1

Sample Description: 5%IPA+HX 1mL/MIN COL-IC

Chrom Type: Fixed WL Chromatogram, 275 nm

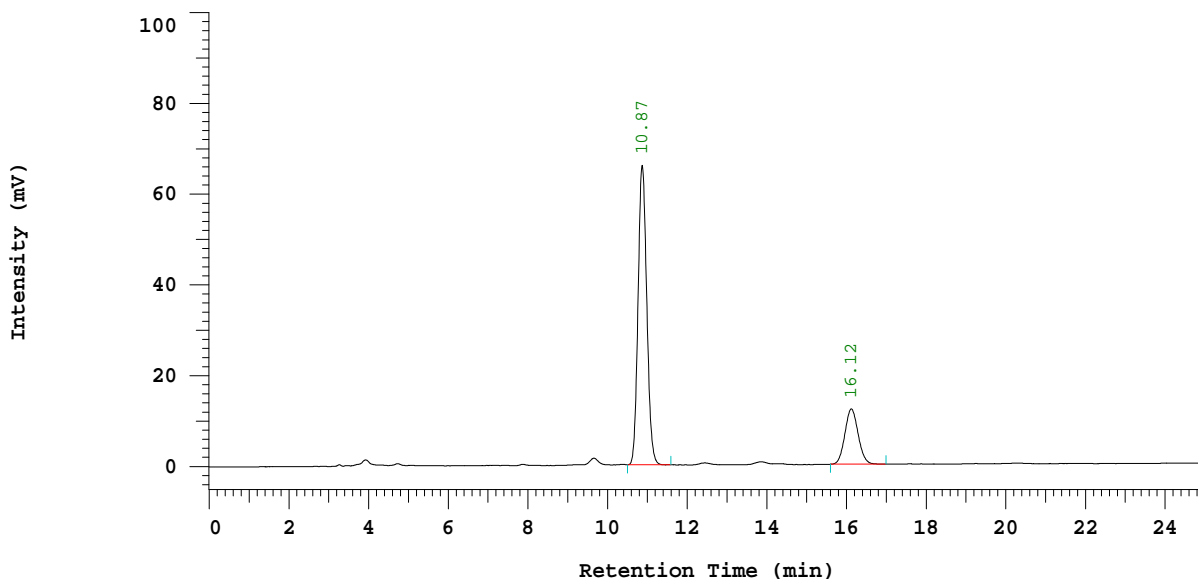

Processing Method: Test-IPA/Hx-1

Column Type: IC

Method Developer: NSD

Method Description:

Chrom Type: Fixed WL Chromatogram, 275 nm

Peak Quantitation: AREA

Calculation Method: EXT-STD

Scale Factor 1: 1.000

| No. | RT    | Area    | Height | Area %  |
|-----|-------|---------|--------|---------|
| 1   | 10.87 | 999878  | 65948  | 78.286  |
| 2   | 16.12 | 277333  | 12135  | 21.714  |
|     |       | 1277211 | 78083  | 100.000 |

Peak rejection level: 200000

Fig S70. HPLC analysis of the compound 4a (Table 1, entry 15)

### D-2000 Elite HPLC System Manager Report

Analyzed Date and Time: 2013/10/23 10:38 上午  
 Reported Date and Time: 2013/10/23 11:54 上午

Processed Date and Time: 2013/10/23 11:52 上午

Data Path: D:\NITIN\DATA\0027\

Processing Method: Test-IPA/Hx-1

System (acquisition): Sys 1

Series: 0027

Application(data): NITIN

Vial Number: 1

Sample Name: NSD-09-113(DHQ-NH2-S-PACH2Cl2)

Vial Type: UNK

Volume: 20.0 ul

Injection from this vial: 1 of 1

Sample Description: 5%IPA+HX 1mL/MIN COL-IC

Chrom Type: Fixed WL Chromatogram, 275 nm

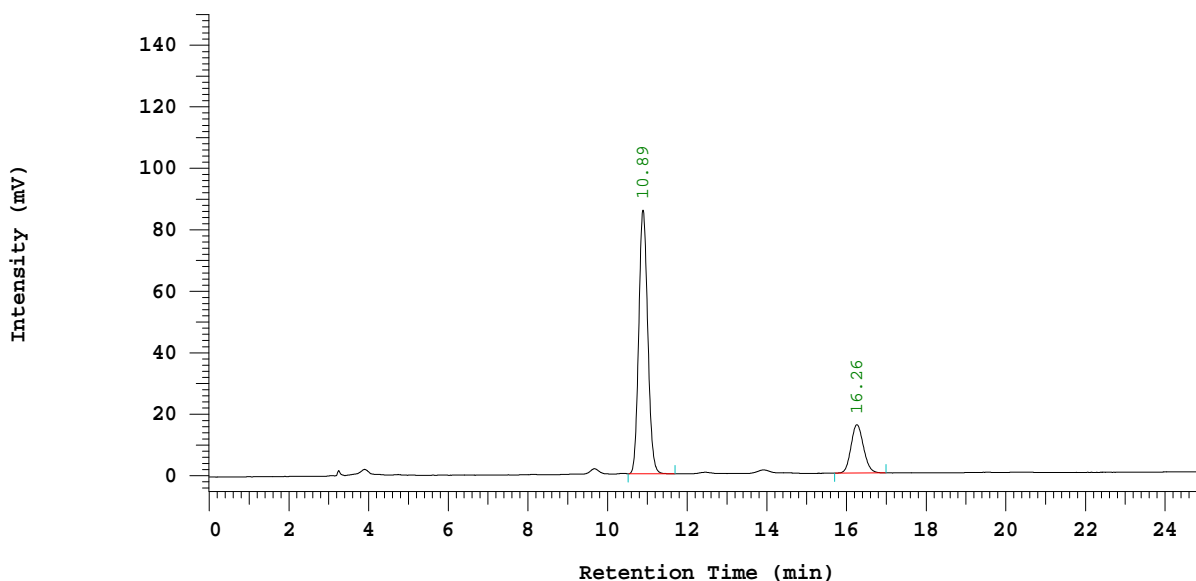

Processing Method: Test-IPA/Hx-1

Column Type: IC

Method Developer: NSD

Method Description:

Chrom Type: Fixed WL Chromatogram, 275 nm

Peak Quantitation: AREA

Calculation Method: EXT-STD

Scale Factor 1: 1.000

| No. | RT    | Area    | Height | Area %  |
|-----|-------|---------|--------|---------|
| 1   | 10.89 | 1338996 | 85661  | 79.793  |
| 2   | 16.26 | 339086  | 15715  | 20.207  |
|     |       | 1678082 | 101376 | 100.000 |

Peak rejection level: 200000

Fig S71. HPLC analysis of the compound 4a (Table 1, entry 16)

### D-2000 Elite HPLC System Manager Report

Analyzed Date and Time: 2013/10/10 10:00 上午  
 Reported Date and Time: 2013/10/10 12:03 下午

Processed Date and Time: 2013/10/10 12:01 下午

Data Path: D:\NITIN\DATA\0023\

Processing Method: Test-IPA/Hx-1

System (acquisition): Sys 1

Series: 0023

Application(data): NITIN

Vial Number: 1

Sample Name: NSD-09-102(QuinineNH2-Toluene)

Vial Type: UNK

Volume: 20.0 ul

Injection from this vial: 1 of 1

Sample Description: 5%IPA+HX 1mL/MIN COL-IC

Chrom Type: Fixed WL Chromatogram, 275 nm

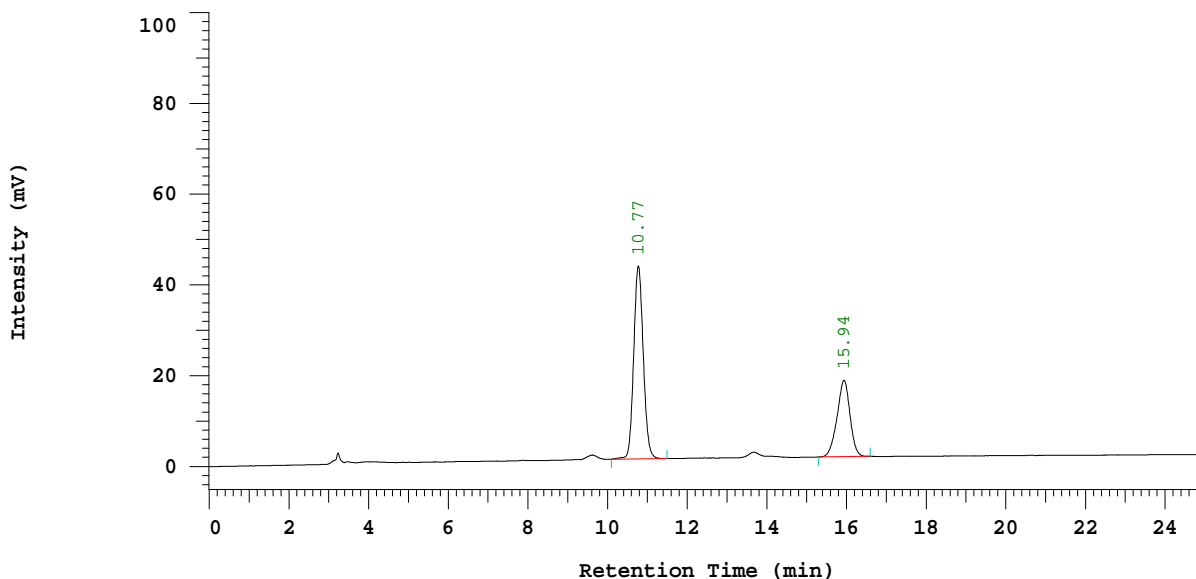

Processing Method: Test-IPA/Hx-1

Column Type: IC

Method Developer: NSD

Method Description:

Chrom Type: Fixed WL Chromatogram, 275 nm

Peak Quantitation: AREA

Calculation Method: EXT-STD

Scale Factor 1: 1.000

| No. | RT    | Area    | Height | Area %  |
|-----|-------|---------|--------|---------|
| 1   | 10.77 | 706987  | 42453  | 65.154  |
| 2   | 15.94 | 378121  | 16844  | 34.846  |
|     |       | 1085108 | 59297  | 100.000 |

Peak rejection level: 200000

Fig S72. HPLC analysis of the compound 4a (Table 1, entry 19)



### D-2000 Elite HPLC System Manager Report

Analyzed Date and Time: 2013/09/26 11:49 上午  
 Reported Date and Time: 2013/09/26 12:25 下午

Processed Date and Time: 2013/09/26 12:23 下午

Data Path: D:\NITIN\DATA\0019\

Processing Method: Test-IPA/Hx-1

System (acquisition): Sys 1 Series: 0019  
 Application(data): NITIN Vial Number: 1  
 Sample Name: NSD-09-103 (Quinine-NH2-CHCl3) Vial Type: UNK  
 Volume: 20.0 ul

Injection from this vial: 1 of 1  
 Sample Description: 5%IPA+HX 1mL/MIN COL-IC

Chrom Type: Fixed WL Chromatogram, 275 nm

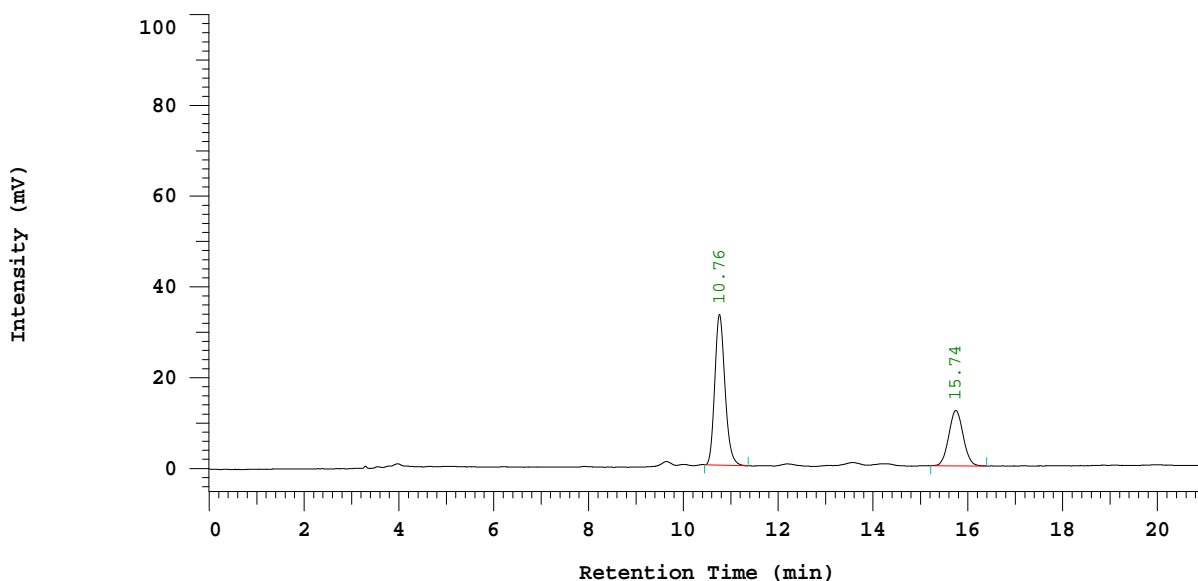

Processing Method: Test-IPA/Hx-1 Method Developer: NSD  
 Column Type: IC  
 Method Description:

Chrom Type: Fixed WL Chromatogram, 275 nm

Peak Quantitation: AREA  
 Calculation Method: EXT-STD  
 Scale Factor 1: 1.000

| No. | RT    | Area   | Height | Area %  |
|-----|-------|--------|--------|---------|
| 1   | 10.76 | 489623 | 33156  | 65.949  |
| 2   | 15.74 | 252803 | 12160  | 34.051  |
|     |       | 742426 | 45316  | 100.000 |

Peak rejection level: 200000

Fig S73. HPLC analysis of the compound 4a (Table 1, entry 20)

### D-2000 Elite HPLC System Manager Report

Analyzed Date and Time: 2013/10/10 10:29 上午  
 Reported Date and Time: 2013/10/10 12:07 下午

Processed Date and Time: 2013/10/10 12:06 下午

Data Path: D:\NITIN\DATA\0024\

Processing Method: Test-IPA/Hx-1

System (acquisition): Sys 1 Series: 0024  
 Application(data): NITIN Vial Number: 1  
 Sample Name: NSD-09-104(QuinineNH2-EtOAc) Vial Type: UNK  
 Volume: 20.0 ul

Injection from this vial: 1 of 1  
 Sample Description: 5%IPA+HX 1mL/MIN COL-IC

Chrom Type: Fixed WL Chromatogram, 275 nm

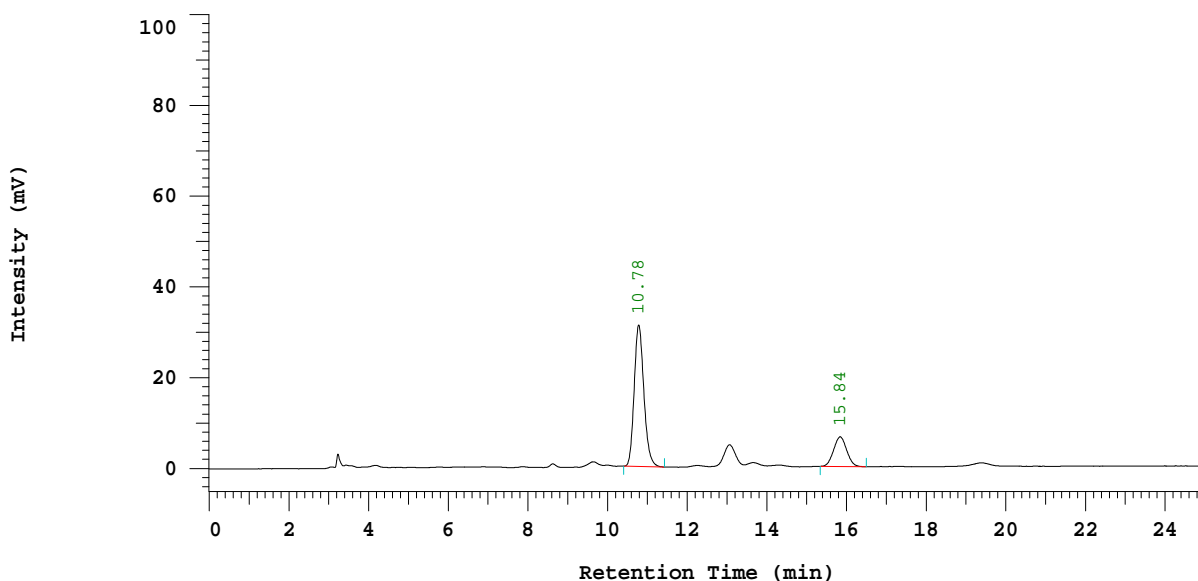

Processing Method: Test-IPA/Hx-1 Method Developer: NSD  
 Column Type: IC  
 Method Description:

Chrom Type: Fixed WL Chromatogram, 275 nm

Peak Quantitation: AREA  
 Calculation Method: EXT-STD  
 Scale Factor 1: 1.000

| No. | RT    | Area   | Height | Area %  |
|-----|-------|--------|--------|---------|
| 1   | 10.78 | 525161 | 31147  | 77.914  |
| 2   | 15.84 | 148861 | 6535   | 22.086  |
|     |       | 674022 | 37682  | 100.000 |

Peak rejection level: 100000

Fig S74. HPLC analysis of the compound 4a (Table 1, entry 21)

### D-2000 Elite HPLC System Manager Report

Analyzed Date and Time: 2013/10/10 11:04 上午  
 Reported Date and Time: 2013/10/10 12:11 下午  
 Processed Date and Time: 2013/10/10 12:10 下午  
 Data Path: D:\NITIN\DATA\0025\  
 Processing Method: Test-IPA/Hx-1  
 System (acquisition): Sys 1 Series: 0025  
 Application(data): NITIN Vial Number: 1  
 Sample Name: NSD-09-105(QuinineNH2-Dioxane) Vial Type: UNK  
 Volume: 20.0 ul  
 Injection from this vial: 1 of 1  
 Sample Description: 5%IPA+HX 1mL/MIN COL-IC

Chrom Type: Fixed WL Chromatogram, 275 nm

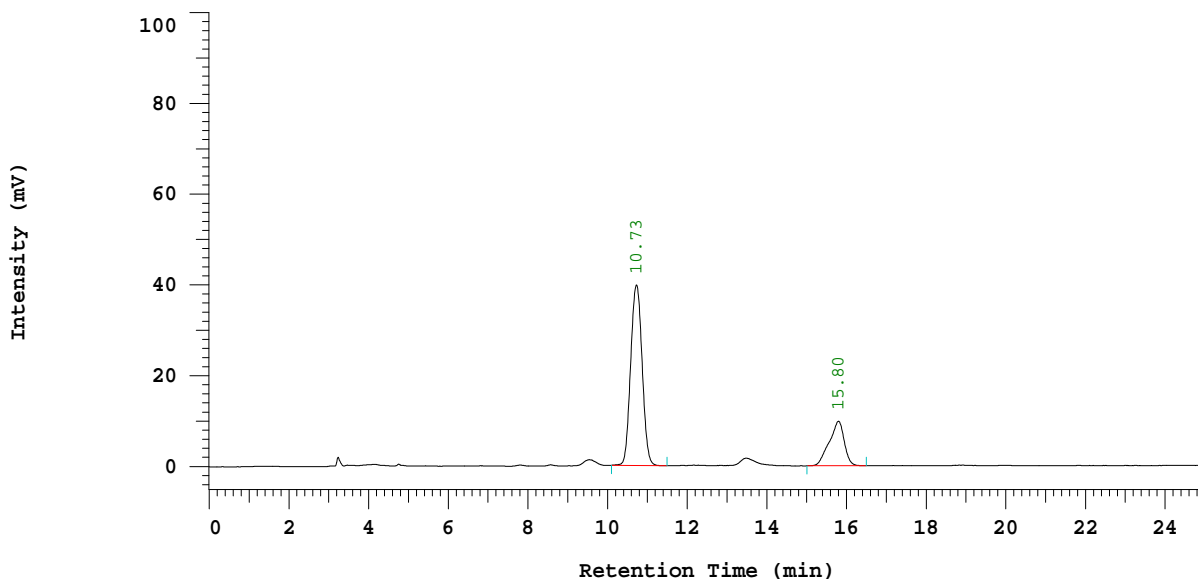

Processing Method: Test-IPA/Hx-1  
 Column Type: IC Method Developer: NSD  
 Method Description:

Chrom Type: Fixed WL Chromatogram, 275 nm

Peak Quantitation: AREA  
 Calculation Method: EXT-STD  
 Scale Factor 1: 1.000

| No. | RT    | Area    | Height | Area %  |
|-----|-------|---------|--------|---------|
| 1   | 10.73 | 791757  | 39731  | 75.604  |
| 2   | 15.80 | 255488  | 9795   | 24.396  |
|     |       | 1047245 | 49526  | 100.000 |

Peak rejection level: 200000

Fig S75. HPLC analysis of the compound 4a (Table 1, entry 22)

### D-2000 Elite HPLC System Manager Report

Analyzed Date and Time: 2013/10/04 04:52 下午  
 Reported Date and Time: 2013/10/04 05:23 下午

Processed Date and Time: 2013/10/04 05:22 下午

Data Path: D:\NITIN\DATA\0022\

Processing Method: Test-IPA/Hx-1

System (acquisition): Sys 1 Series: 0022  
 Application(data): NITIN Vial Number: 1  
 Sample Name: NSD-09-106 (Quinine-NH2-THF) Vial Type: UNK  
 Volume: 20.0 ul

Injection from this vial: 1 of 1  
 Sample Description: 5%IPA+HX 1mL/MIN COL-IC

Chrom Type: Fixed WL Chromatogram, 275 nm

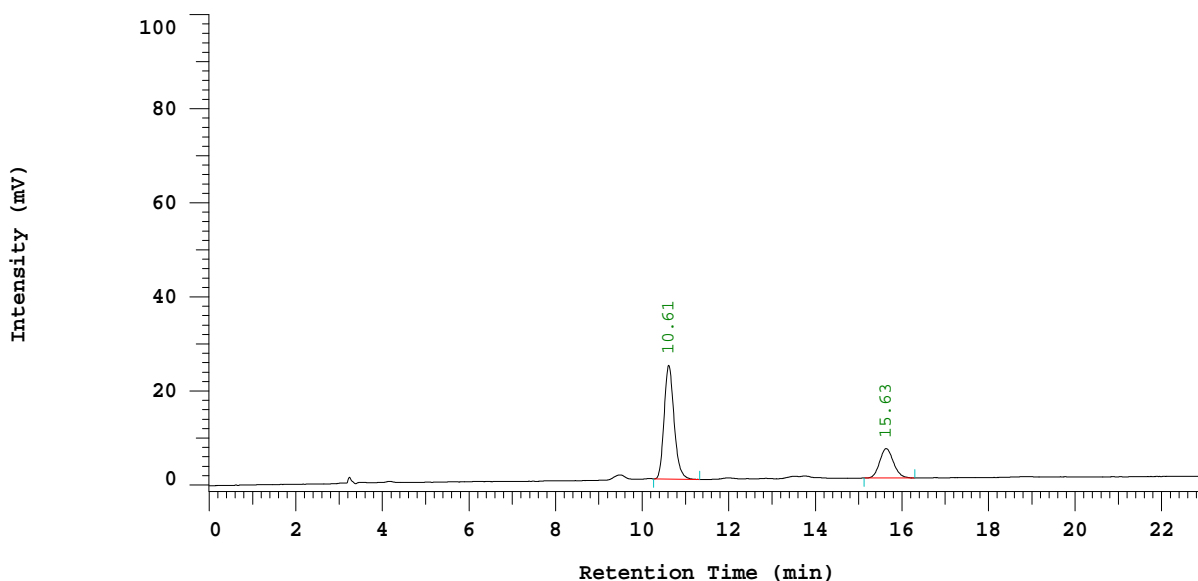

Processing Method: Test-IPA/Hx-1 Method Developer: NSD  
 Column Type: IC  
 Method Description:

Chrom Type: Fixed WL Chromatogram, 275 nm

Peak Quantitation: AREA  
 Calculation Method: EXT-STD  
 Scale Factor 1: 1.000

| No. | RT    | Area   | Height | Area %  |
|-----|-------|--------|--------|---------|
| 1   | 10.61 | 385348 | 24162  | 73.762  |
| 2   | 15.63 | 137069 | 6249   | 26.238  |
|     |       | 522417 | 30411  | 100.000 |

Peak rejection level: 100000

Fig S76. HPLC analysis of the compound 4a (Table 1, entry 23)

### D-2000 Elite HPLC System Manager Report

Analyzed Date and Time: 2013/10/10 11:32 上午  
 Reported Date and Time: 2013/10/10 12:14 下午

Processed Date and Time: 2013/10/10 12:12 下午

Data Path: D:\NITIN\DATA\0026\

Processing Method: Test-IPA/Hx-1

System (acquisition): Sys 1 Series: 0026  
 Application(data): NITIN Vial Number: 1  
 Sample Name: NSD-09-110 (QuinineNH2-DCE) Vial Type: UNK  
 Volume: 20.0 ul

Injection from this vial: 1 of 1  
 Sample Description: 5%IPA+HX 1mL/MIN COL-IC

Chrom Type: Fixed WL Chromatogram, 275 nm

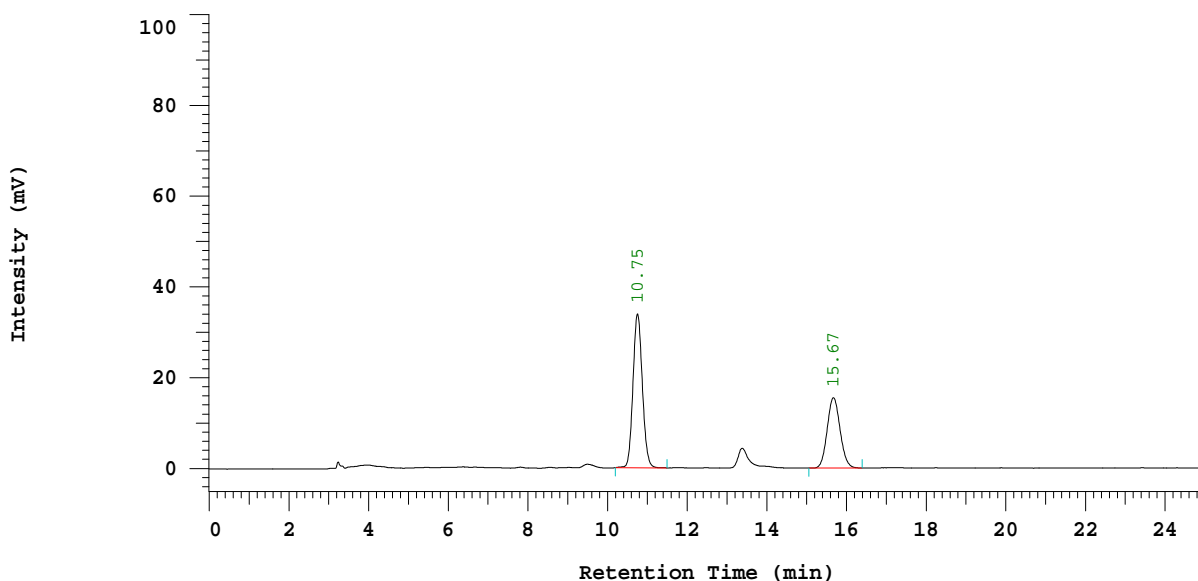

Processing Method: Test-IPA/Hx-1 Method Developer: NSD  
 Column Type: IC  
 Method Description:

Chrom Type: Fixed WL Chromatogram, 275 nm

Peak Quantitation: AREA  
 Calculation Method: EXT-STD  
 Scale Factor 1: 1.000

| No. | RT    | Area   | Height | Area %  |
|-----|-------|--------|--------|---------|
| 1   | 10.75 | 550756 | 33883  | 61.378  |
| 2   | 15.67 | 346560 | 15491  | 38.622  |
|     |       | 897316 | 49374  | 100.000 |

Peak rejection level: 200000

Fig S77. HPLC analysis of the compound 4a (Table 1, entry 24)

### D-2000 Elite HPLC System Manager Report

Analyzed Date and Time: 2013/12/06 11:04 上午  
 Reported Date and Time: 2013/12/06 01:40 下午

Processed Date and Time: 2013/12/06 01:38 下午

Data Path: D:\NITIN\DATA\0044\

Processing Method: Test-IPA/Hx-1

System (acquisition): Sys 1 Series: 0044  
 Application(data): NITIN Vial Number: 1  
 Sample Name: NSD-09-131(DHQ-DCM-EtOAc) Vial Type: UNK  
 Injection from this vial: 1 of 1 Volume: 20.0 ul  
 Sample Description: 5%IPA+HX 1mL/MIN COL-IC

Chrom Type: Fixed WL Chromatogram, 275 nm

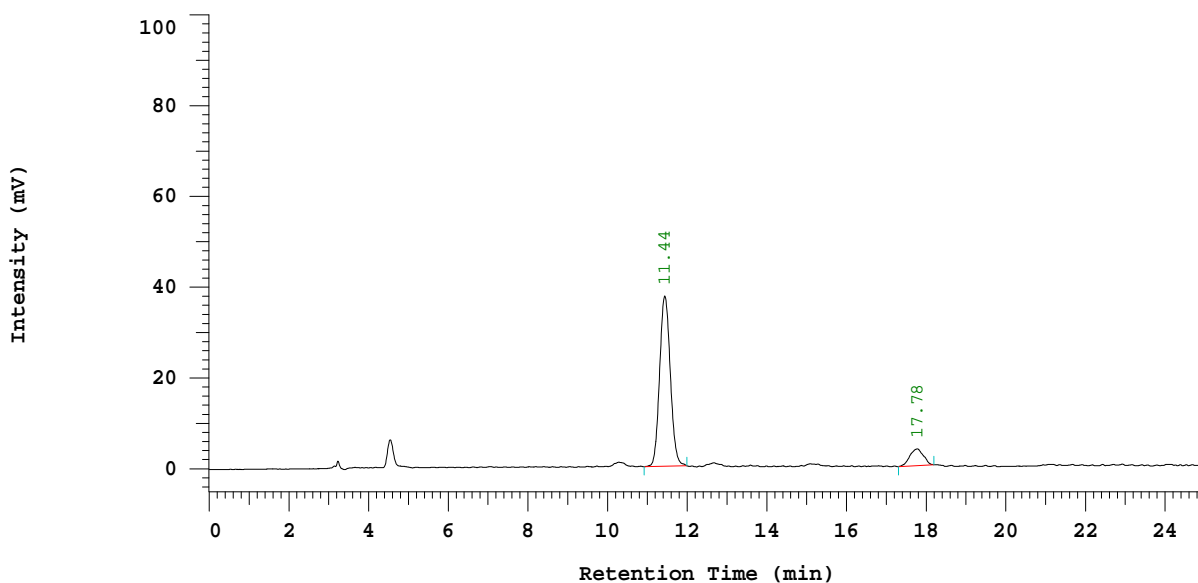

Processing Method: Test-IPA/Hx-1

Column Type: IC

Method Developer: NSD

Method Description:

Chrom Type: Fixed WL Chromatogram, 275 nm

Peak Quantitation: AREA

Calculation Method: EXT-STD

Scale Factor 1: 1.000

| No. | RT    | Area   | Height | Area %  |
|-----|-------|--------|--------|---------|
| 1   | 11.44 | 693371 | 37478  | 88.935  |
| 2   | 17.78 | 86268  | 3659   | 11.065  |
|     |       | 779639 | 41137  | 100.000 |

Peak rejection level: 50000

Fig S78. HPLC analysis of the compound 4a (Table 1, entry 26)

### D-2000 Elite HPLC System Manager Report

Analyzed Date and Time: 2014/02/28 06:01 下午  
 Reported Date and Time: 2014/03/05 06:50 下午

Processed Date and Time: 2014/03/05 06:49 下午

Data Path: D:\NITIN\DATA\0081\

Processing Method: test-IPA/Hx-3

System (acquisition): Sys 1 Series: 0081  
 Application(data): NITIN Vial Number: 1  
 Sample Name: NSD-09-172-F1 (Chiral) Vial Type: UNK  
 Injection from this vial: 1 of 1 Volume: 20.0 ul  
 Sample Description: 5%IPA+HX 1mL/Min Col-IC

Chrom Type: Fixed WL Chromatogram, 280 nm

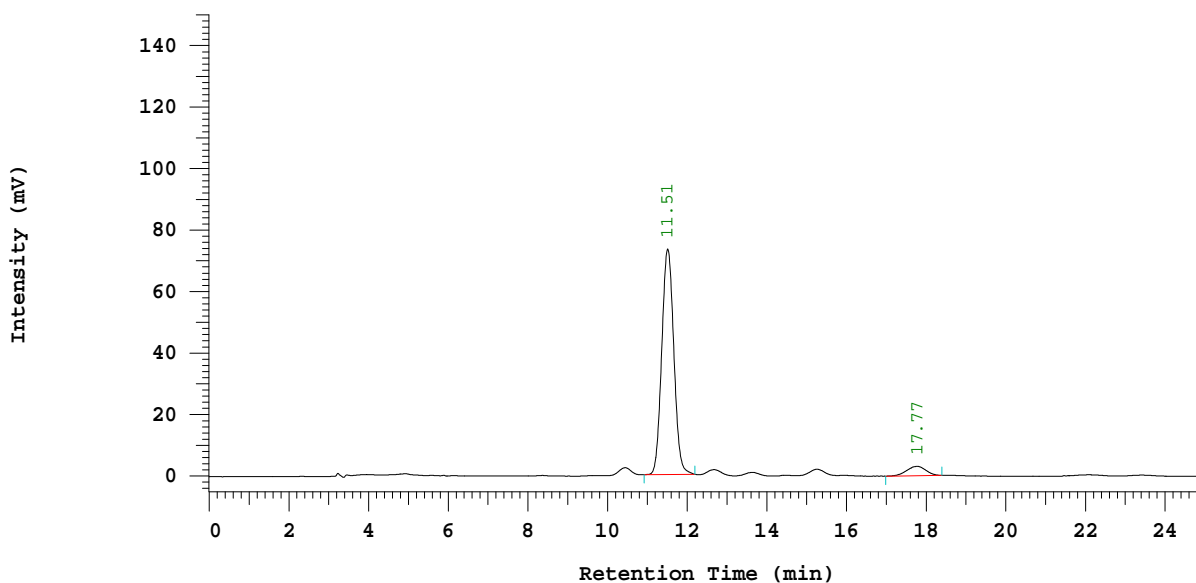

Processing Method: test-IPA/Hx-3  
 Column Type: IC Method Developer: NITIN  
 Method Description:

Chrom Type: Fixed WL Chromatogram, 280 nm

Peak Quantitation: AREA  
 Calculation Method: EXT-STD  
 Scale Factor 1: 1.000

| No. | RT    | Area    | Height | Area %  |
|-----|-------|---------|--------|---------|
| 1   | 11.51 | 1533021 | 73316  | 93.722  |
| 2   | 17.77 | 102695  | 3073   | 6.278   |
|     |       | 1635716 | 76389  | 100.000 |

Peak rejection level: 50000

Fig S79. HPLC analysis of the compound 4a (Table 1, entry 27)

### D-2000 Elite HPLC System Manager Report

Analyzed Date and Time: 2013/12/06 01:34 下午  
 Reported Date and Time: 2013/12/06 02:48 下午

Processed Date and Time: 2013/12/06 02:47 下午

Data Path: D:\NITIN\DATA\0045\

Processing Method: Test-IPA/Hx-1

System (acquisition): Sys 1 Series: 0045  
 Application(data): NITIN Vial Number: 1  
 Sample Name: NSD-09-132(DHQ-CHCl3-EtOAc) Vial Type: UNK  
 Volume: 20.0 ul

Injection from this vial: 1 of 1  
 Sample Description: 5%IPA+HX 1mL/MIN COL-IC

Chrom Type: Fixed WL Chromatogram, 275 nm

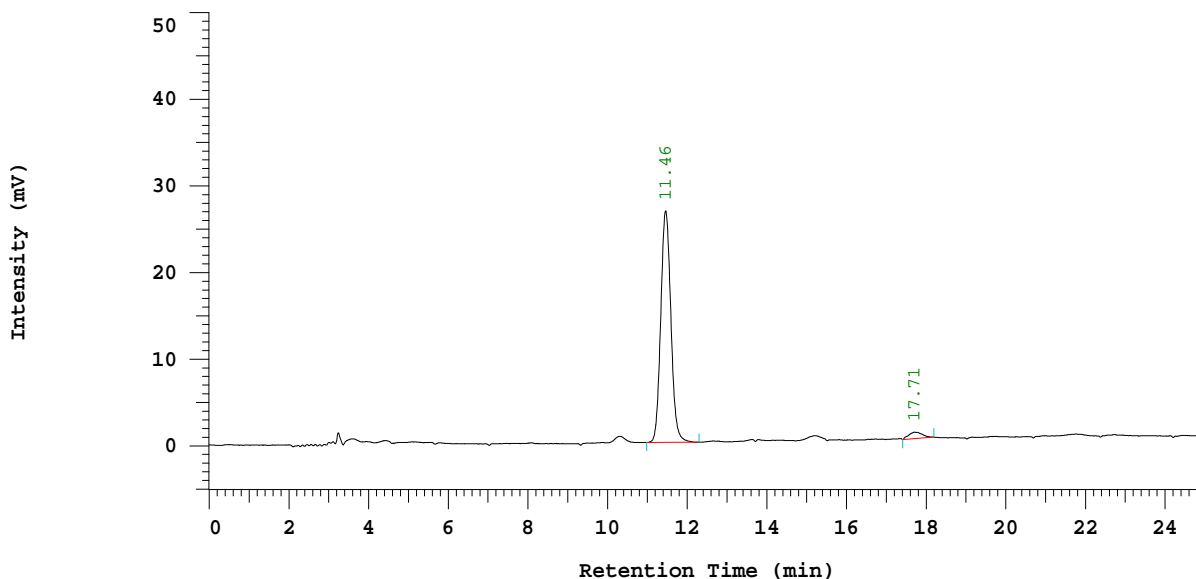

Processing Method: Test-IPA/Hx-1  
 Column Type: IC Method Developer: NSD  
 Method Description:

Chrom Type: Fixed WL Chromatogram, 275 nm

Peak Quantitation: AREA  
 Calculation Method: EXT-STD  
 Scale Factor 1: 1.000

| No. | RT    | Area   | Height | Area %  |
|-----|-------|--------|--------|---------|
| 1   | 11.46 | 467565 | 26696  | 96.358  |
| 2   | 17.71 | 17673  | 745    | 3.642   |
|     |       | 485238 | 27441  | 100.000 |

Peak rejection level: 10000

Fig S80. HPLC analysis of the compound 4a (Table 1, entry 28)



### D-2000 Elite HPLC System Manager Report

Analyzed Date and Time: 2013/12/31 02:15 下午  
 Reported Date and Time: 2013/12/31 04:45 下午  
 Processed Date and Time: 2013/12/31 04:44 下午  
 Data Path: D:\NITIN\DATA\0058\  
 Processing Method: Test-IPA/Hx-1  
 System (acquisition): Sys 1 Series: 0058  
 Application(data): NITIN Vial Number: 1  
 Sample Name: NSD-09-145(DHQ-CHCl3-EtOAc) Vial Type: UNK  
 Volume: 20.0 ul  
 Injection from this vial: 1 of 1  
 Sample Description: 5%IPA+HX 1mL/MIN COL-IC

Chrom Type: Fixed WL Chromatogram, 275 nm

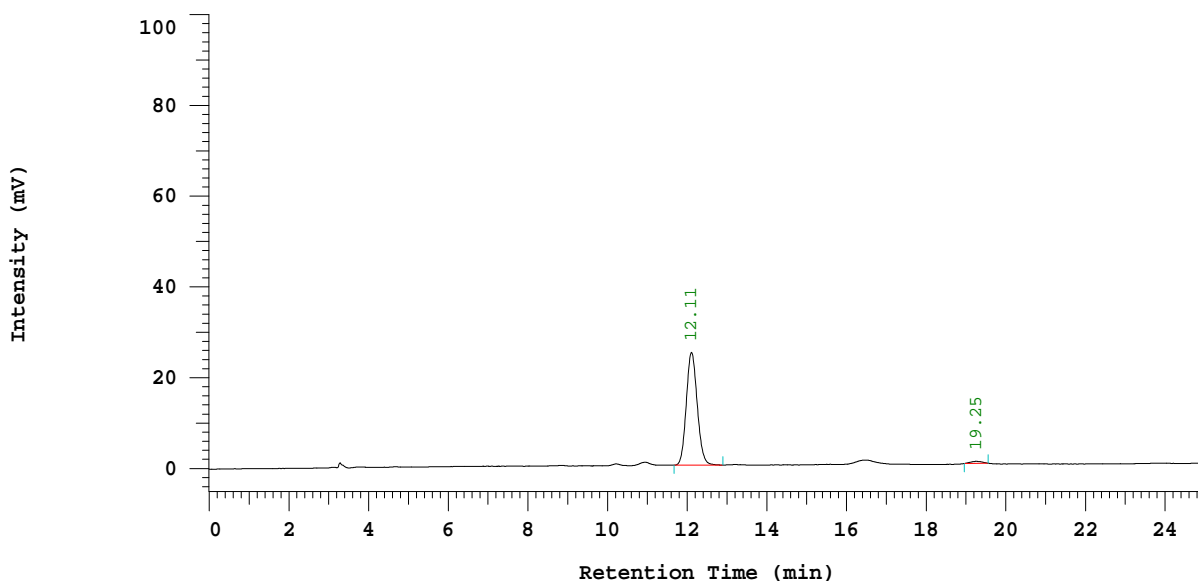

Processing Method: Test-IPA/Hx-1  
 Column Type: IC Method Developer: NSD  
 Method Description:

Chrom Type: Fixed WL Chromatogram, 275 nm

Peak Quantitation: AREA  
 Calculation Method: EXT-STD  
 Scale Factor 1: 1.000

| No. | RT    | Area   | Height | Area %  |
|-----|-------|--------|--------|---------|
| 1   | 12.11 | 469252 | 24830  | 98.140  |
| 2   | 19.25 | 8893   | 445    | 1.860   |
|     |       | 478145 | 25275  | 100.000 |

Peak rejection level: 5000

Fig S81. HPLC analysis of the compound 4a (Table 1, entry 29)

### D-2000 Elite HPLC System Manager Report

Analyzed Date and Time: 2014/01/09 02:16 下午  
 Reported Date and Time: 2014/01/16 02:21 下午

Processed Date and Time: 2014/01/16 02:20 下午

Data Path: D:\NITIN\DATA\0064\

Processing Method: Test-IPA/Hx-1

System (acquisition): Sys 1 Series: 0064  
 Application(data): NITIN Vial Number: 1  
 Sample Name: NSD-09-160(MicroW-CHCl3-EtOAc) Vial Type: UNK  
 Volume: 20.0 ul

Injection from this vial: 1 of 1  
 Sample Description: 5%IPA+HX 1mL/MIN COL-IC

Chrom Type: Fixed WL Chromatogram, 275 nm

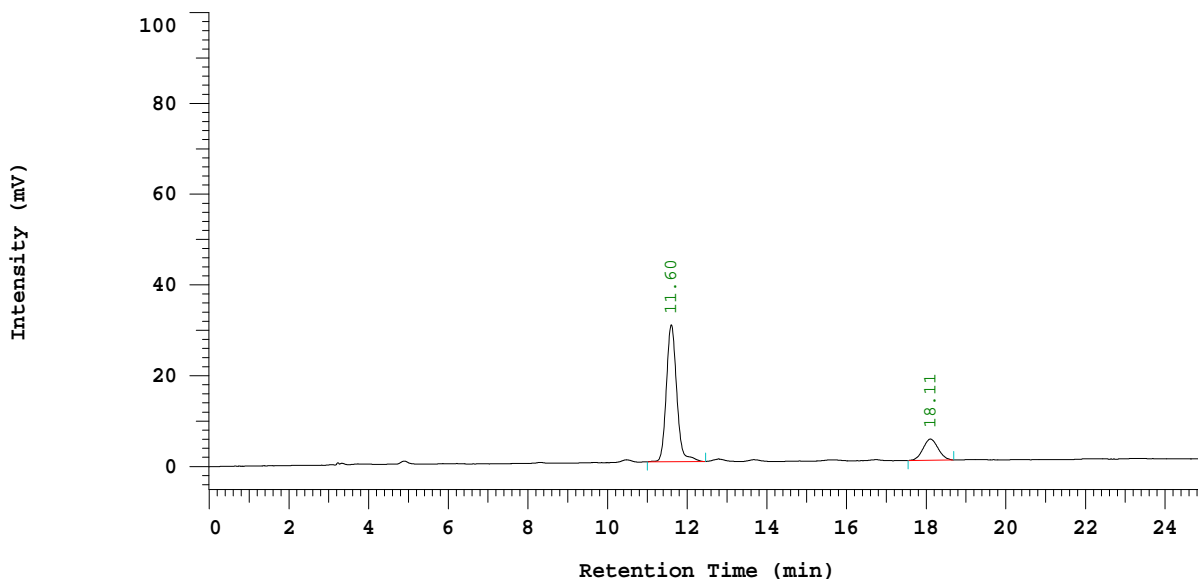

Processing Method: Test-IPA/Hx-1 Method Developer: NSD  
 Column Type: IC  
 Method Description:

Chrom Type: Fixed WL Chromatogram, 275 nm

Peak Quantitation: AREA  
 Calculation Method: EXT-STD  
 Scale Factor 1: 1.000

| No. | RT    | Area   | Height | Area %  |
|-----|-------|--------|--------|---------|
| 1   | 11.60 | 541879 | 30119  | 81.628  |
| 2   | 18.11 | 121956 | 4653   | 18.372  |
|     |       | 663835 | 34772  | 100.000 |

Peak rejection level: 100000

Fig S82. HPLC analysis of the compound 4a (Table 1, entry 30)

### D-2000 Elite HPLC System Manager Report

Analyzed Date and Time: 2014/02/28 05:28 下午  
 Reported Date and Time: 2014/03/05 06:46 下午

Processed Date and Time: 2014/03/05 06:45 下午

Data Path: D:\NITIN\DATA\0079\

Processing Method: test-IPA/Hx-3

System (acquisition): Sys 1 Series: 0079  
 Application(data): NITIN Vial Number: 1  
 Sample Name: NSD-09-183 (Racemic) Vial Type: UNK  
 Injection from this vial: 1 of 1 Volume: 20.0 ul  
 Sample Description: 5%IPA+HX 1mL/MIN COL-IC

Chrom Type: Fixed WL Chromatogram, 280 nm



Processing Method: test-IPA/Hx-3

Column Type: IC

Method Developer: NITIN

Method Description:

Chrom Type: Fixed WL Chromatogram, 280 nm

Peak Quantitation: AREA

Calculation Method: EXT-STD

Scale Factor 1: 1.000

| No. | RT    | Area    | Height | Area %  |
|-----|-------|---------|--------|---------|
| 1   | 11.26 | 692724  | 40304  | 50.611  |
| 2   | 17.36 | 676005  | 19959  | 49.389  |
|     |       | 1368729 | 60263  | 100.000 |

Peak rejection level: 200000

Fig S83. HPLC analysis of the racemic compound 4a, as a standard for comparison (Scheme 2)

### D-2000 Elite HPLC System Manager Report

Analyzed Date and Time: 2014/02/28 06:01 下午  
 Reported Date and Time: 2014/03/05 06:50 下午

Processed Date and Time: 2014/03/05 06:49 下午

Data Path: D:\NITIN\DATA\0081\

Processing Method: test-IPA/Hx-3

System (acquisition): Sys 1 Series: 0081  
 Application(data): NITIN Vial Number: 1  
 Sample Name: NSD-09-172-F1 (Chiral) Vial Type: UNK  
 Injection from this vial: 1 of 1 Volume: 20.0 ul  
 Sample Description: 5%IPA+HX 1mL/Min Col-IC

Chrom Type: Fixed WL Chromatogram, 280 nm



Processing Method: test-IPA/Hx-3  
 Column Type: IC Method Developer: NITIN  
 Method Description:

Chrom Type: Fixed WL Chromatogram, 280 nm

Peak Quantitation: AREA  
 Calculation Method: EXT-STD  
 Scale Factor 1: 1.000

| No. | RT    | Area    | Height | Area %  |
|-----|-------|---------|--------|---------|
| 1   | 11.51 | 1533021 | 73316  | 93.722  |
| 2   | 17.77 | 102695  | 3073   | 6.278   |
|     |       | 1635716 | 76389  | 100.000 |

Peak rejection level: 50000

Fig S84. HPLC analysis of the compound 4a (Scheme 2, Method A)

### D-2000 Elite HPLC System Manager Report

Analyzed Date and Time: 2014/02/28 04:27 下午  
 Reported Date and Time: 2014/03/05 05:52 下午

Processed Date and Time: 2014/03/05 05:52 下午

Data Path: D:\NITIN\DATA\0082\

Processing Method: test-IPA/Hx-3

System (acquisition): Sys 1 Series: 0082  
 Application(data): NITIN Vial Number: 1  
 Sample Name: NSD-09-172-F1 (CO) Vial Type: UNK  
 Injection from this vial: 1 of 1 Volume: 20.0 ul  
 Sample Description: 5%IPA+HX 1mL/Min Col-IC

Chrom Type: Fixed WL Chromatogram, 280 nm

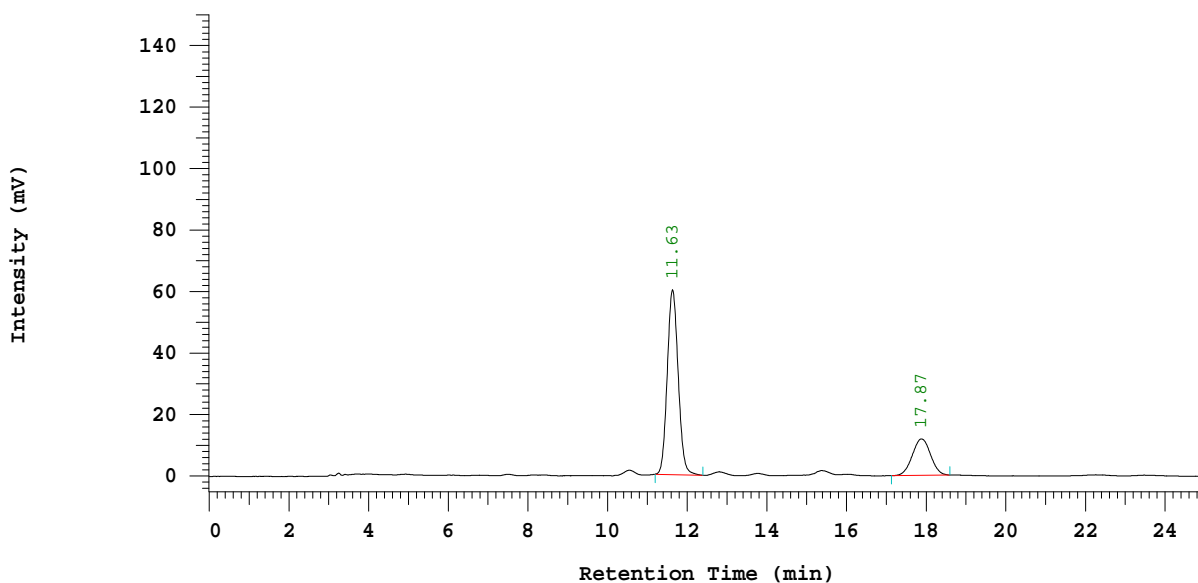

Processing Method: test-IPA/Hx-3

Column Type: IC

Method Developer: NITIN

Method Description:

Chrom Type: Fixed WL Chromatogram, 280 nm

Peak Quantitation: AREA

Calculation Method: EXT-STD

Scale Factor 1: 1.000

| No. | RT    | Area    | Height | Area %  |
|-----|-------|---------|--------|---------|
| 1   | 11.63 | 1142080 | 60059  | 75.172  |
| 2   | 17.87 | 377213  | 11872  | 24.828  |
|     |       | 1519293 | 71931  | 100.000 |

Peak rejection level: 200000

Fig S85. HPLC analysis of the mixture of chiral compound 4a and the racemic 4a, for comparison (Scheme 2, Method A)

### D-2000 Elite HPLC System Manager Report

Analyzed Date and Time: 2014/03/07 11:22 上午  
 Reported Date and Time: 2014/03/07 12:02 下午

Processed Date and Time: 2014/03/07 12:01 下午

Data Path: D:\NITIN\DATA\0086\

Processing Method: test-IPA/Hx-3

System (acquisition): Sys 1 Series: 0086  
 Application(data): NITIN Vial Number: 1  
 Sample Name: NSD-09-132(cat+acid1:1- Indole) Vial Type: UNK  
 Volume: 20.0 ul

Injection from this vial: 1 of 1  
 Sample Description: 5%IPA+HX 1mL/MIN COL-IC

Chrom Type: Fixed WL Chromatogram, 280 nm

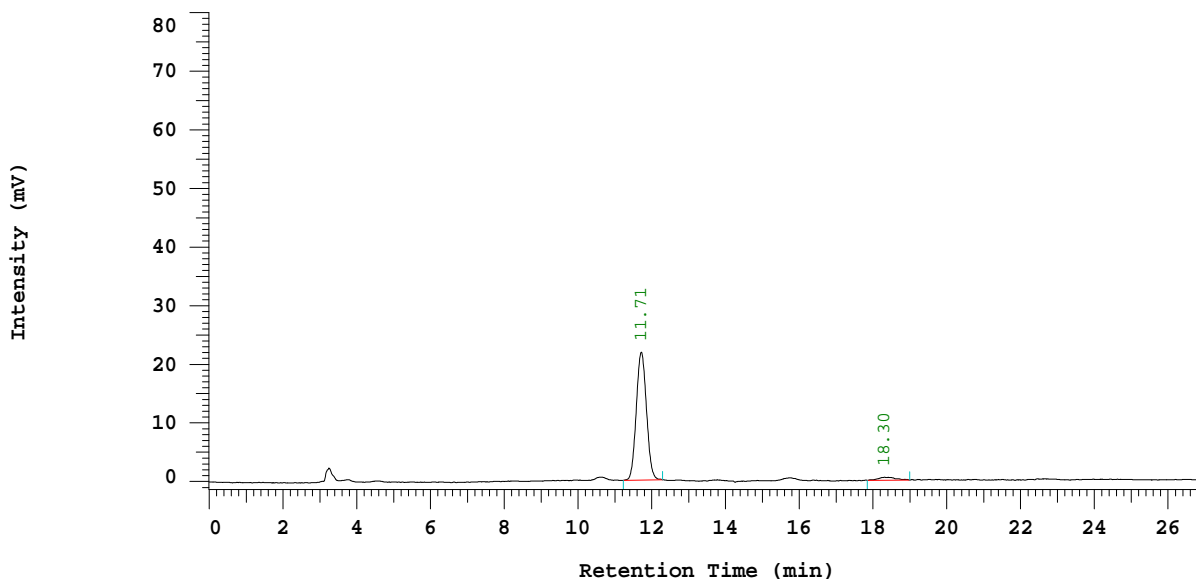

Processing Method: test-IPA/Hx-3 Method Developer: NITIN  
 Column Type: IC  
 Method Description:

Chrom Type: Fixed WL Chromatogram, 280 nm

Peak Quantitation: AREA  
 Calculation Method: EXT-STD  
 Scale Factor 1: 1.000

| No. | RT    | Area   | Height | Area %  |
|-----|-------|--------|--------|---------|
| 1   | 11.71 | 416923 | 21789  | 96.081  |
| 2   | 18.30 | 17006  | 501    | 3.919   |
|     |       | 433929 | 22290  | 100.000 |

Peak rejection level: 5000

Fig S86. HPLC analysis of the compound 4a (Scheme 2, Method B)

### D-2000 Elite HPLC System Manager Report

Analyzed Date and Time: 2014/02/17 10:22 上午  
 Reported Date and Time: 2014/02/17 11:48 上午

Processed Date and Time: 2014/02/17 11:47 上午

Data Path: D:\NITIN\DATA\0073\

Processing Method: test-IPA/Hx-3

System (acquisition): Sys 1 Series: 0073  
 Application(data): NITIN Vial Number: 1  
 Sample Name: NSD-09-171 (Racemic) Vial Type: UNK  
 Injection from this vial: 1 of 1 Volume: 20.0 ul  
 Sample Description: 8%IPA+HX 1mL/MIN COL-IC

Chrom Type: Fixed WL Chromatogram, 280 nm

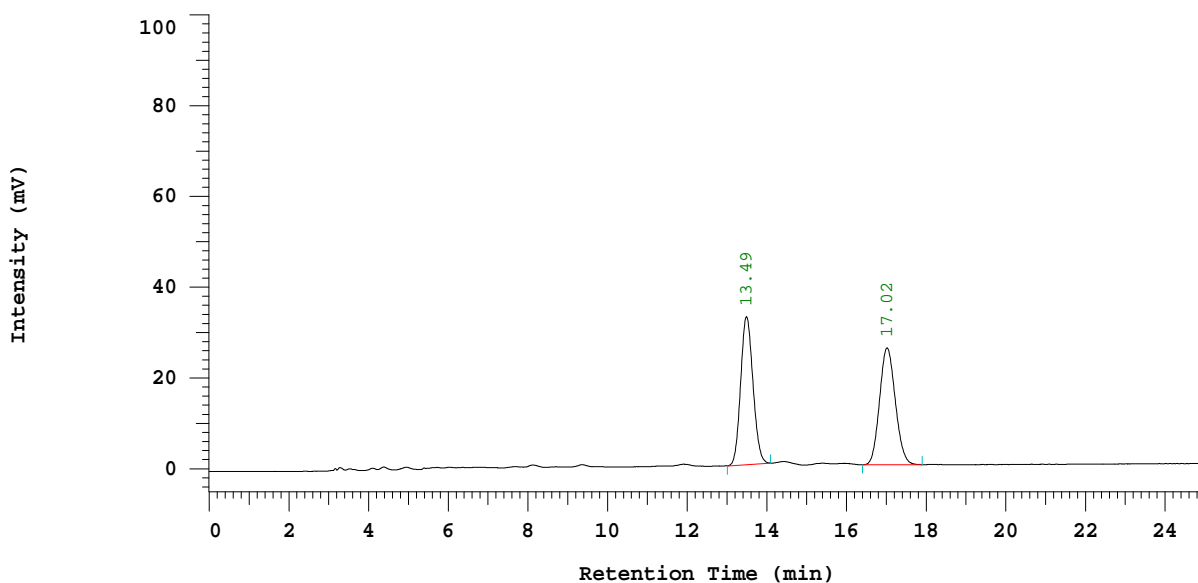

Processing Method: test-IPA/Hx-3

Column Type: IC

Method Developer: NITIN

Method Description:

Chrom Type: Fixed WL Chromatogram, 280 nm

Peak Quantitation: AREA

Calculation Method: EXT-STD

Scale Factor 1: 1.000

| No. | RT    | Area    | Height | Area %  |
|-----|-------|---------|--------|---------|
| 1   | 13.49 | 696417  | 32607  | 49.782  |
| 2   | 17.02 | 702508  | 25754  | 50.218  |
|     |       | 1398925 | 58361  | 100.000 |

Peak rejection level: 200000

Fig S87. HPLC analysis of the racemic compound 4b, as a standard for comparison (Scheme 2)

### D-2000 Elite HPLC System Manager Report

Analyzed Date and Time: 2014/02/17 10:49 上午  
 Reported Date and Time: 2014/02/17 11:51 上午

Processed Date and Time: 2014/02/17 11:50 上午

Data Path: D:\NITIN\DATA\0074\

Processing Method: test-IPA/Hx-3

System (acquisition): Sys 1 Series: 0074  
 Application(data): NITIN Vial Number: 1  
 Sample Name: NSD-09-169-F1 (Chiral) Vial Type: UNK  
 Injection from this vial: 1 of 1 Volume: 20.0 ul  
 Sample Description: 8%IPA+HX 1mL/Min Col-IC

Chrom Type: Fixed WL Chromatogram, 280 nm

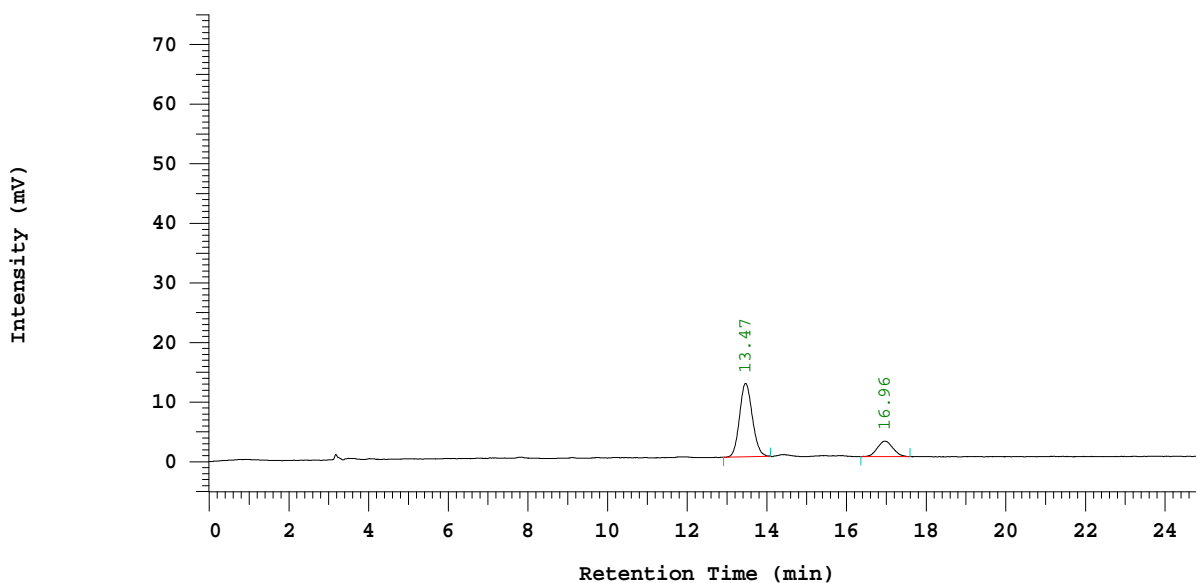

Processing Method: test-IPA/Hx-3

Column Type: IC

Method Developer: NITIN

Method Description:

Chrom Type: Fixed WL Chromatogram, 280 nm

Peak Quantitation: AREA

Calculation Method: EXT-STD

Scale Factor 1: 1.000

| No. | RT    | Area   | Height | Area %  |
|-----|-------|--------|--------|---------|
| 1   | 13.47 | 274210 | 12318  | 79.412  |
| 2   | 16.96 | 71090  | 2634   | 20.588  |
|     |       | 345300 | 14952  | 100.000 |

Peak rejection level: 50000

Fig S88. HPLC analysis of the compound 4b (Scheme 2, Method A)



### D-2000 Elite HPLC System Manager Report

Analyzed Date and Time: 2014/02/17 11:15 上午  
 Reported Date and Time: 2014/02/17 11:53 上午

Processed Date and Time: 2014/02/17 11:52 上午

Data Path: D:\NITIN\DATA\0075\

Processing Method: test-IPA/Hx-3

System (acquisition): Sys 1 Series: 0075  
 Application(data): NITIN Vial Number: 1  
 Sample Name: NSD-09-169-F1 (CO) Vial Type: UNK  
 Injection from this vial: 1 of 1 Volume: 20.0 ul  
 Sample Description: 8%IPA+HX 1mL/Min Col-IC

Chrom Type: Fixed WL Chromatogram, 280 nm

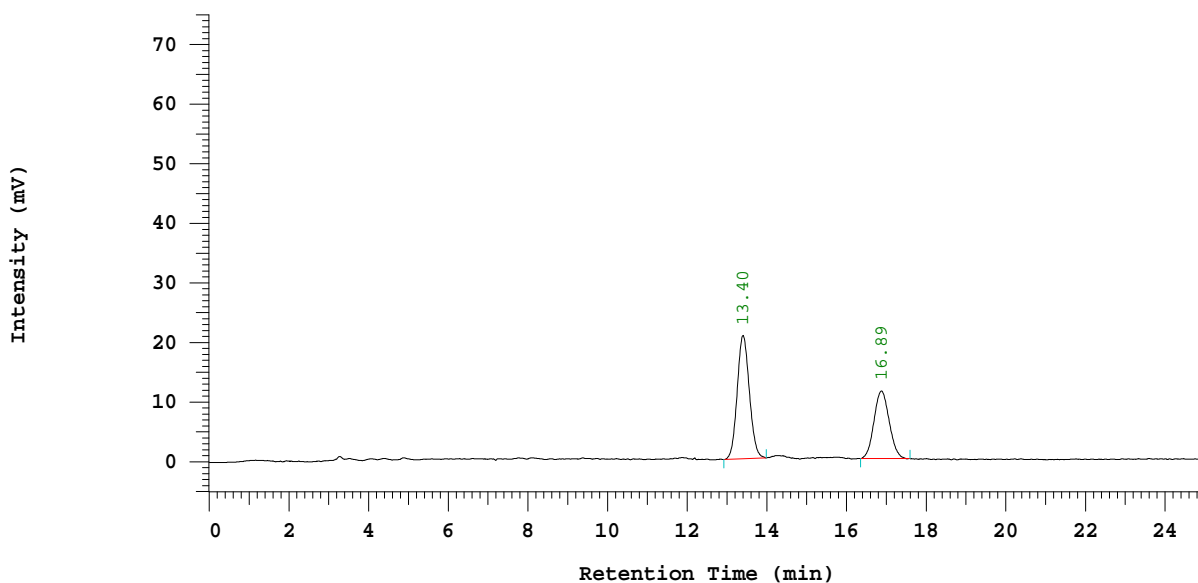

Processing Method: test-IPA/Hx-3

Column Type: IC

Method Developer: NITIN

Method Description:

Chrom Type: Fixed WL Chromatogram, 280 nm

Peak Quantitation: AREA

Calculation Method: EXT-STD

Scale Factor 1: 1.000

| No. | RT    | Area   | Height | Area %  |
|-----|-------|--------|--------|---------|
| 1   | 13.40 | 438442 | 20697  | 59.344  |
| 2   | 16.89 | 300377 | 11350  | 40.656  |
|     |       | 738819 | 32047  | 100.000 |

Peak rejection level: 50000

Fig S89. HPLC analysis of the mixture of chiral compound 4b and the racemic 4b, for comparison (Scheme 2, Method A)

### D-2000 Elite HPLC System Manager Report

Analyzed Date and Time: 2014/03/07 10:37 上午  
 Reported Date and Time: 2014/03/07 11:09 上午

Processed Date and Time: 2014/03/07 11:07 上午

Data Path: D:\NITIN\DATA\0085\

Processing Method: test-IPA/Hx-3

System (acquisition): Sys 1 Series: 0085  
 Application(data): NITIN Vial Number: 1  
 Sample Name: NSD-09-178(cat+acid-1:1-5 Vial Type: UNK  
 -OMe) Volume: 20.0 ul

Injection from this vial: 1 of 1  
 Sample Description: 8%IPA+HX 1mL/MIN COL-IC

Chrom Type: Fixed WL Chromatogram, 280 nm

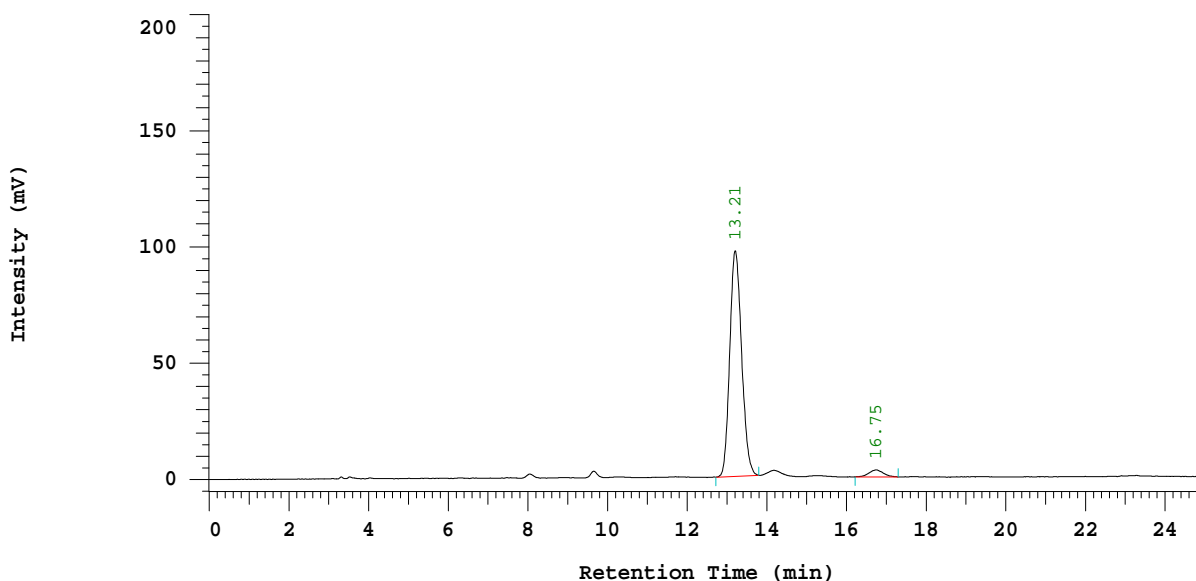

Processing Method: test-IPA/Hx-3 Method Developer: NITIN  
 Column Type: IC  
 Method Description:

Chrom Type: Fixed WL Chromatogram, 280 nm

Peak Quantitation: AREA  
 Calculation Method: EXT-STD  
 Scale Factor 1: 1.000

| No. | RT    | Area    | Height | Area %  |
|-----|-------|---------|--------|---------|
| 1   | 13.21 | 1996824 | 97014  | 96.365  |
| 2   | 16.75 | 75329   | 2975   | 3.635   |
|     |       | 2072153 | 99989  | 100.000 |

Peak rejection level: 50000

Fig S90. HPLC analysis of the compound 4b (Scheme 2, Method B)

### D-2000 Elite HPLC System Manager Report

Analyzed Date and Time: 2014/03/11 10:28 上午  
 Reported Date and Time: 2014/03/11 12:07 下午

Processed Date and Time: 2014/03/11 12:05 下午

Data Path: D:\NITIN\DATA\0087\

Processing Method: test-IPA/Hx-3

System (acquisition): Sys 1 Series: 0087  
 Application(data): NITIN Vial Number: 1  
 Sample Name: NSD-09-185-F1 (Racemic) Vial Type: UNK  
 Injection from this vial: 1 of 1 Volume: 20.0 ul  
 Sample Description: 5%IPA+HX 1mL/MIN COL-IC

Chrom Type: Fixed WL Chromatogram, 280 nm

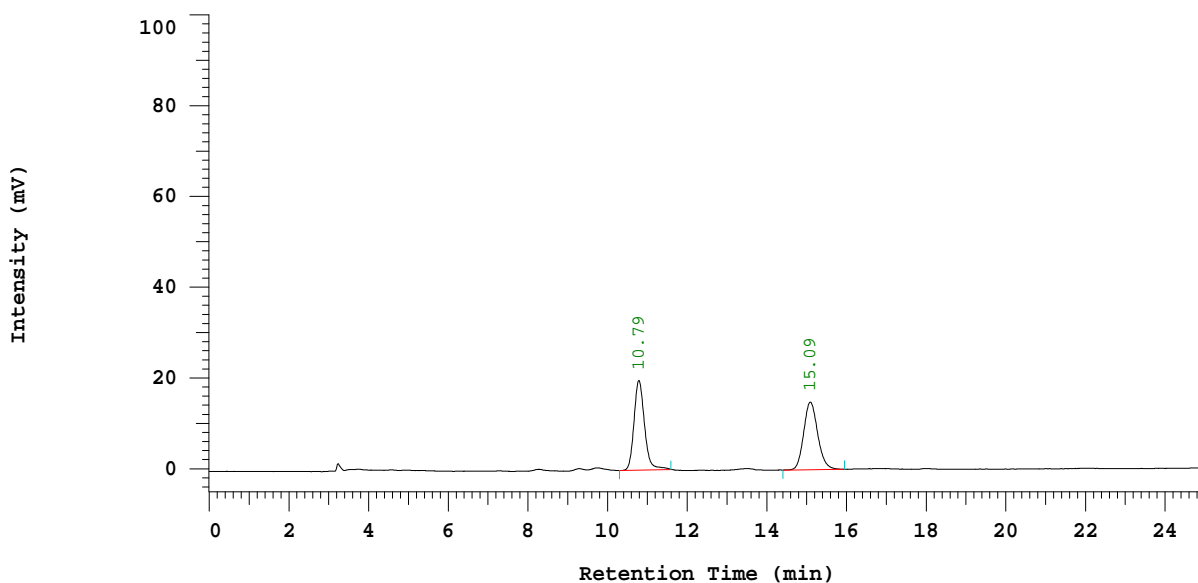

Processing Method: test-IPA/Hx-3

Column Type: IC

Method Developer: NITIN

Method Description:

Chrom Type: Fixed WL Chromatogram, 280 nm

Peak Quantitation: AREA

Calculation Method: EXT-STD

Scale Factor 1: 1.000

| No. | RT    | Area   | Height | Area %  |
|-----|-------|--------|--------|---------|
| 1   | 10.79 | 361173 | 19723  | 49.633  |
| 2   | 15.09 | 366513 | 14909  | 50.367  |
|     |       | 727686 | 34632  | 100.000 |

Peak rejection level: 200000

Fig S91. HPLC analysis of the racemic compound 4c, as a standard for comparison (Scheme 2)

### D-2000 Elite HPLC System Manager Report

Analyzed Date and Time: 2014/03/11 10:59 上午  
 Reported Date and Time: 2014/03/11 12:08 下午

Processed Date and Time: 2014/03/11 12:07 下午

Data Path: D:\NITIN\DATA\0088\

Processing Method: test-IPA/Hx-3

System (acquisition): Sys 1 Series: 0088  
 Application(data): NITIN Vial Number: 1  
 Sample Name: NSD-09-175-F1 (Chiral) Vial Type: UNK  
 Injection from this vial: 1 of 1 Volume: 20.0 ul  
 Sample Description: 5%IPA+HX 1mL/Min Col-IC

Chrom Type: Fixed WL Chromatogram, 280 nm

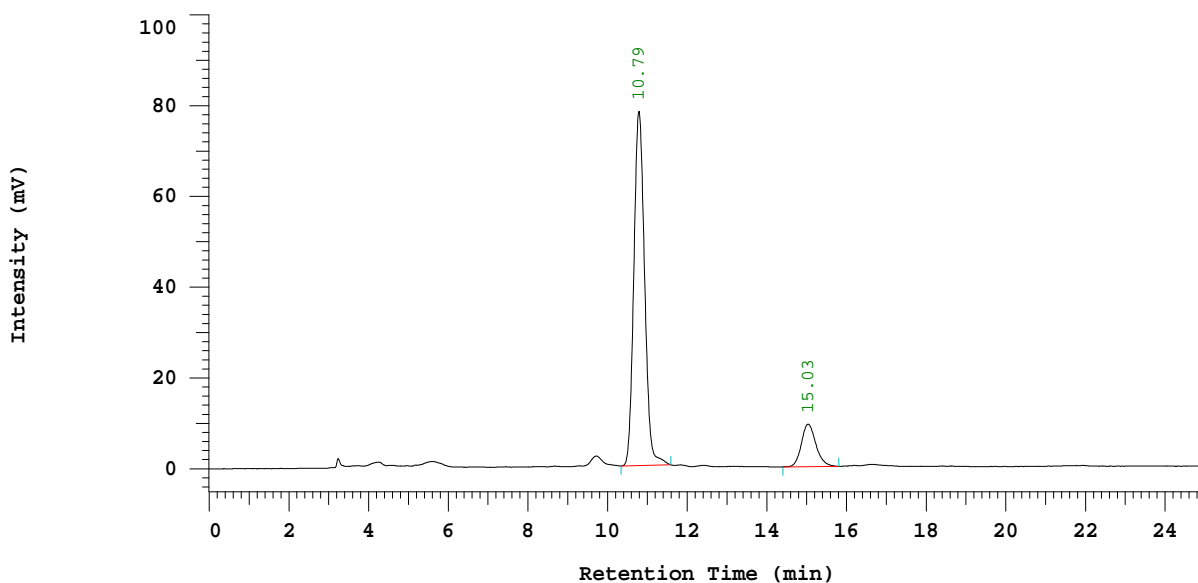

Processing Method: test-IPA/Hx-3

Column Type: IC

Method Developer: NITIN

Method Description:

Chrom Type: Fixed WL Chromatogram, 280 nm

Peak Quantitation: AREA

Calculation Method: EXT-STD

Scale Factor 1: 1.000

| No. | RT    | Area    | Height | Area %  |
|-----|-------|---------|--------|---------|
| 1   | 10.79 | 1460557 | 78016  | 86.058  |
| 2   | 15.03 | 236618  | 9340   | 13.942  |
|     |       | 1697175 | 87356  | 100.000 |

Peak rejection level: 200000

Fig S92. HPLC analysis of the compound 4c (Scheme 2, Method A)

### D-2000 Elite HPLC System Manager Report

Analyzed Date and Time: 2014/03/11 11:27 上午  
 Reported Date and Time: 2014/03/11 12:10 下午

Processed Date and Time: 2014/03/11 12:09 下午

Data Path: D:\NITIN\DATA\0089\

Processing Method: test-IPA/Hx-3

System (acquisition): Sys 1 Series: 0089  
 Application(data): NITIN Vial Number: 1  
 Sample Name: NSD-09-175-F1 (CO) Vial Type: UNK  
 Injection from this vial: 1 of 1 Volume: 20.0 ul  
 Sample Description: 5%IPA+HX 1mL/Min Col-IC

Chrom Type: Fixed WL Chromatogram, 280 nm

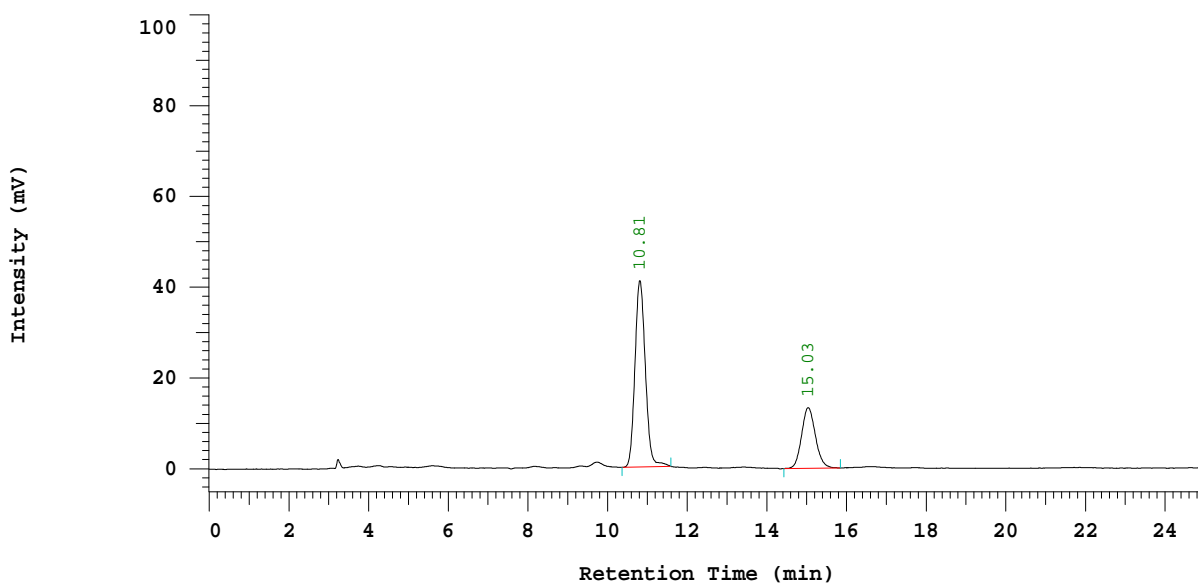

Processing Method: test-IPA/Hx-3

Column Type: IC

Method Developer: NITIN

Method Description:

Chrom Type: Fixed WL Chromatogram, 280 nm

Peak Quantitation: AREA

Calculation Method: EXT-STD

Scale Factor 1: 1.000

| No. | RT    | Area    | Height | Area %  |
|-----|-------|---------|--------|---------|
| 1   | 10.81 | 744820  | 41036  | 69.671  |
| 2   | 15.03 | 324238  | 13368  | 30.329  |
|     |       | 1069058 | 54404  | 100.000 |

Peak rejection level: 200000

Fig S93. HPLC analysis of the mixture of chiral compound 4c and the racemic 4c, for comparison (Scheme 2, Method A)

### D-2000 Elite HPLC System Manager Report

Analyzed Date and Time: 2014/06/25 01:17 下午  
 Reported Date and Time: 2014/06/25 02:18 下午

Processed Date and Time: 2014/06/25 02:16 下午

Data Path: D:\NITIN\DATA\0140\

Processing Method: test-IPA/Hx-3

System (acquisition): Sys 1 Series: 0140  
 Application(data): NITIN Vial Number: 1  
 Sample Name: NSD-10-27-F1 cat-acid(1:1) Vial Type: UNK  
 Injection from this vial: 1 of 1 Volume: 20.0 ul  
 Sample Description: 5%IPA+HX 1mL/MIN COL-IC

Chrom Type: Fixed WL Chromatogram, 280 nm

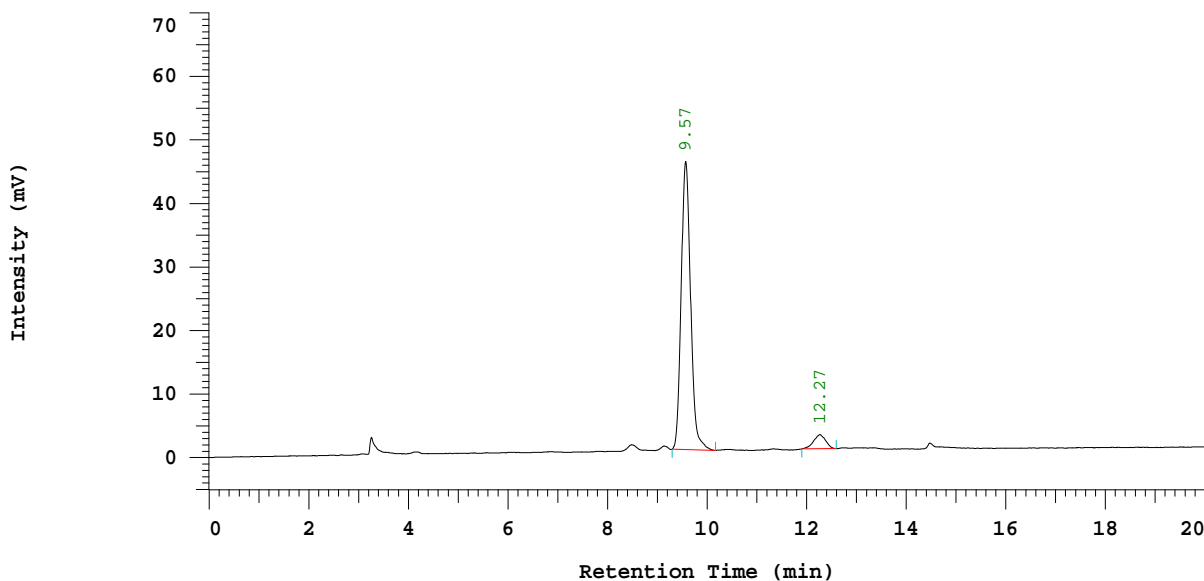

Processing Method: test-IPA/Hx-3

Column Type: IC

Method Developer: NITIN

Method Description:

Chrom Type: Fixed WL Chromatogram, 280 nm

Peak Quantitation: AREA

Calculation Method: EXT-STD

Scale Factor 1: 1.000

| No. | RT    | Area   | Height | Area %  |
|-----|-------|--------|--------|---------|
| 1   | 9.57  | 597009 | 45311  | 94.015  |
| 2   | 12.27 | 38005  | 2205   | 5.985   |
|     |       | 635014 | 47516  | 100.000 |

Peak rejection level: 5000

Fig S94. HPLC analysis of the compound 4c (Scheme 2, Method B)

### D-2000 Elite HPLC System Manager Report

Analyzed Date and Time: 2014/03/27 11:00 上午  
 Reported Date and Time: 2014/03/27 12:50 下午

Processed Date and Time: 2014/03/27 12:48 下午

Data Path: D:\NITIN\DATA\0093\

Processing Method: test-IPA/Hx-3

System (acquisition): Sys 1 Series: 0093  
 Application(data): NITIN Vial Number: 1  
 Sample Name: NSD-10-06-F1 (Racemic) Vial Type: UNK  
 Injection from this vial: 1 of 1 Volume: 20.0 ul  
 Sample Description: 8%IPA+HX 1mL/MIN COL-IC

Chrom Type: Fixed WL Chromatogram, 280 nm

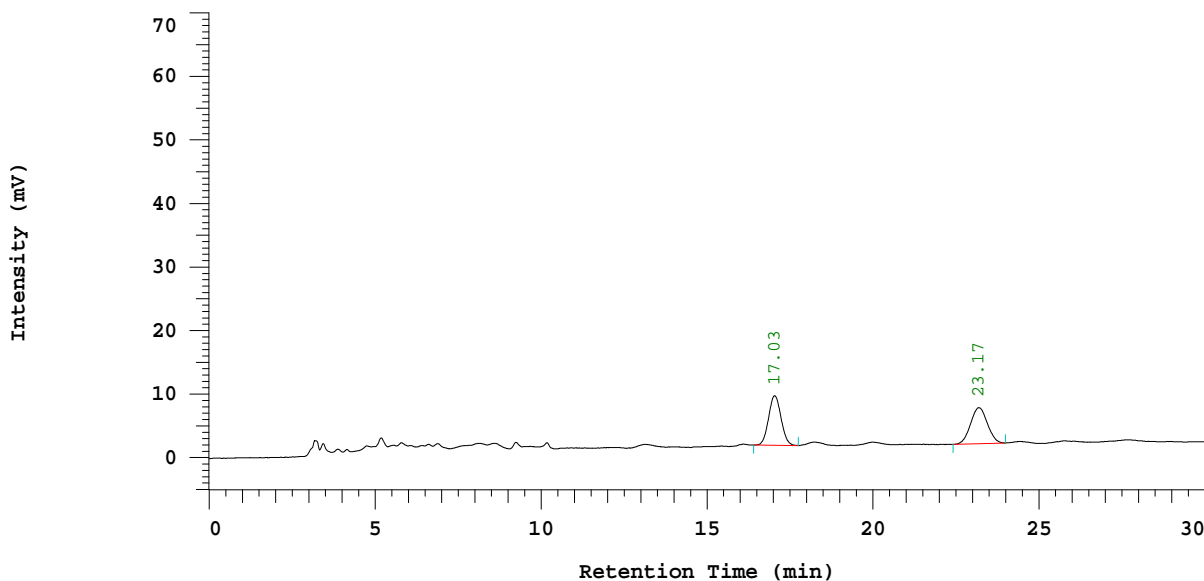

Processing Method: test-IPA/Hx-3

Column Type: IC

Method Developer: NITIN

Method Description:

Chrom Type: Fixed WL Chromatogram, 280 nm

Peak Quantitation: AREA

Calculation Method: EXT-STD

Scale Factor 1: 1.000

| No. | RT    | Area   | Height | Area %  |
|-----|-------|--------|--------|---------|
| 1   | 17.03 | 202014 | 7800   | 50.320  |
| 2   | 23.17 | 199443 | 5659   | 49.680  |
|     |       | 401457 | 13459  | 100.000 |

Peak rejection level: 50000

Fig S95. HPLC analysis of the racemic compound 4d, as a standard for comparison (Scheme 2)

### D-2000 Elite HPLC System Manager Report

Analyzed Date and Time: 2014/03/27 11:35 上午  
 Reported Date and Time: 2014/03/27 12:54 下午

Processed Date and Time: 2014/03/27 12:53 下午

Data Path: D:\NITIN\DATA\0094\

Processing Method: test-IPA/Hx-3

System (acquisition): Sys 1 Series: 0094  
 Application(data): NITIN Vial Number: 1  
 Sample Name: NSD-09-186-F1 (Chiral) Vial Type: UNK  
 Injection from this vial: 1 of 1 Volume: 20.0 ul  
 Sample Description: 8%IPA+HX 1mL/Min Col-IC

Chrom Type: Fixed WL Chromatogram, 280 nm

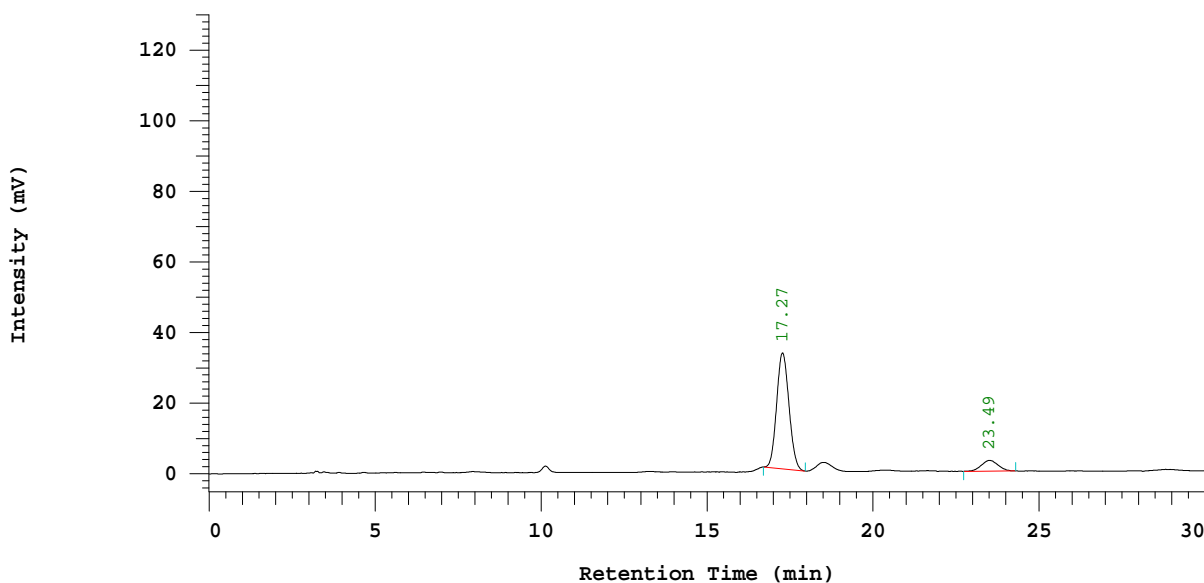

Processing Method: test-IPA/Hx-3

Column Type: IC

Method Developer: NITIN

Method Description:

Chrom Type: Fixed WL Chromatogram, 280 nm

Peak Quantitation: AREA

Calculation Method: EXT-STD

Scale Factor 1: 1.000

| No. | RT    | Area   | Height | Area %  |
|-----|-------|--------|--------|---------|
| 1   | 17.27 | 840037 | 32818  | 88.748  |
| 2   | 23.49 | 106506 | 3026   | 11.252  |
|     |       | 946543 | 35844  | 100.000 |

Peak rejection level: 50000

Fig S96. HPLC analysis of the compound 4d (Scheme 2, Method A)



### D-2000 Elite HPLC System Manager Report

Analyzed Date and Time: 2014/03/27 12:06 下午  
 Reported Date and Time: 2014/03/27 12:55 下午

Processed Date and Time: 2014/03/27 12:55 下午

Data Path: D:\NITIN\DATA\0095\

Processing Method: test-IPA/Hx-3

System (acquisition): Sys 1 Series: 0095  
 Application(data): NITIN Vial Number: 1  
 Sample Name: NSD-09-186-F1 (CO) Vial Type: UNK  
 Injection from this vial: 1 of 1 Volume: 20.0 ul  
 Sample Description: 8%IPA+HX 1mL/Min Col-IC

Chrom Type: Fixed WL Chromatogram, 280 nm

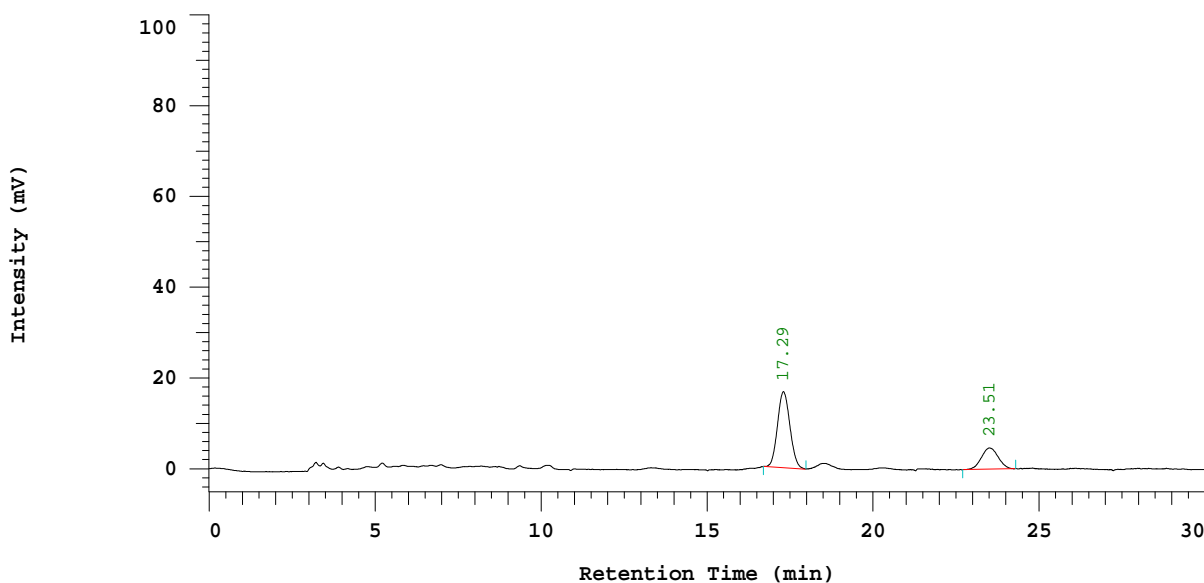

Processing Method: test-IPA/Hx-3

Column Type: IC

Method Developer: NITIN

Method Description:

Chrom Type: Fixed WL Chromatogram, 280 nm

Peak Quantitation: AREA

Calculation Method: EXT-STD

Scale Factor 1: 1.000

| No. | RT    | Area   | Height | Area %  |
|-----|-------|--------|--------|---------|
| 1   | 17.29 | 432392 | 16734  | 72.585  |
| 2   | 23.51 | 163308 | 4666   | 27.415  |
|     |       | 595700 | 21400  | 100.000 |

Peak rejection level: 50000

Fig S97. HPLC analysis of the mixture of chiral compound 4d and the racemic 4d, for comparison (Scheme 2, Method A)

### D-2000 Elite HPLC System Manager Report

Analyzed Date and Time: 2014/04/04 04:23 下午  
 Reported Date and Time: 2014/04/04 05:04 下午

Processed Date and Time: 2014/04/04 05:03 下午

Data Path: D:\NITIN\DATA\0104\

Processing Method: test-IPA/Hx-3

System (acquisition): Sys 1 Series: 0104  
 Application(data): NITIN Vial Number: 1  
 Sample Name: NSD-10-04-F1 (acid-cat-1:1) Vial Type: UNK  
 Volume: 20.0 ul

Injection from this vial: 1 of 1  
 Sample Description: 8%IPA+HX 1mL/MIN COL-IC

Chrom Type: Fixed WL Chromatogram, 280 nm

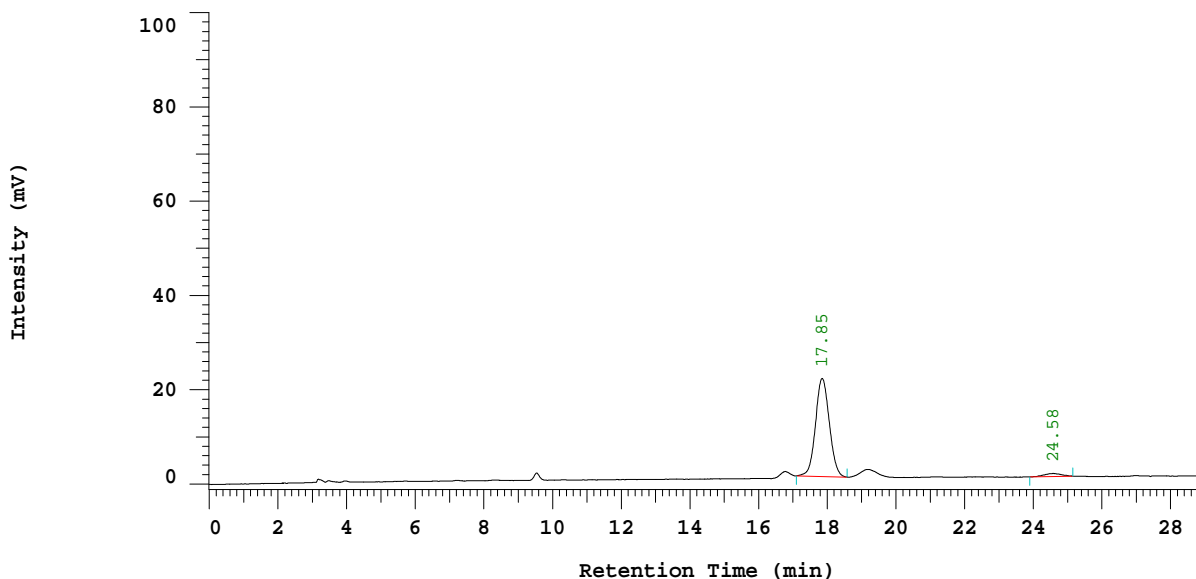

Processing Method: test-IPA/Hx-3 Method Developer: NITIN  
 Column Type: IC  
 Method Description:

Chrom Type: Fixed WL Chromatogram, 280 nm

Peak Quantitation: AREA  
 Calculation Method: EXT-STD  
 Scale Factor 1: 1.000

| No. | RT    | Area   | Height | Area %  |
|-----|-------|--------|--------|---------|
| 1   | 17.85 | 580047 | 20778  | 96.225  |
| 2   | 24.58 | 22755  | 652    | 3.775   |
|     |       | 602802 | 21430  | 100.000 |

Peak rejection level: 5000

Fig S98. HPLC analysis of the compound 4d (Scheme 2, Method B)

### D-2000 Elite HPLC System Manager Report

Analyzed Date and Time: 2014/05/19 11:24 上午  
 Reported Date and Time: 2014/05/19 01:46 下午

Processed Date and Time: 2014/05/19 01:45 下午

Data Path: D:\NITIN\DATA\0124\

Processing Method: Test-IPA/Hx-2

System (acquisition): Sys 1 Series: 0124  
 Application(data): NITIN Vial Number: 1  
 Sample Name: NSD-10-02-F1 (Racemic) Vial Type: UNK  
 Injection from this vial: 1 of 1 Volume: 20.0 ul  
 Sample Description: 10%IPA+HX 1mL/MIN COL-IA

Chrom Type: Fixed WL Chromatogram, 280 nm

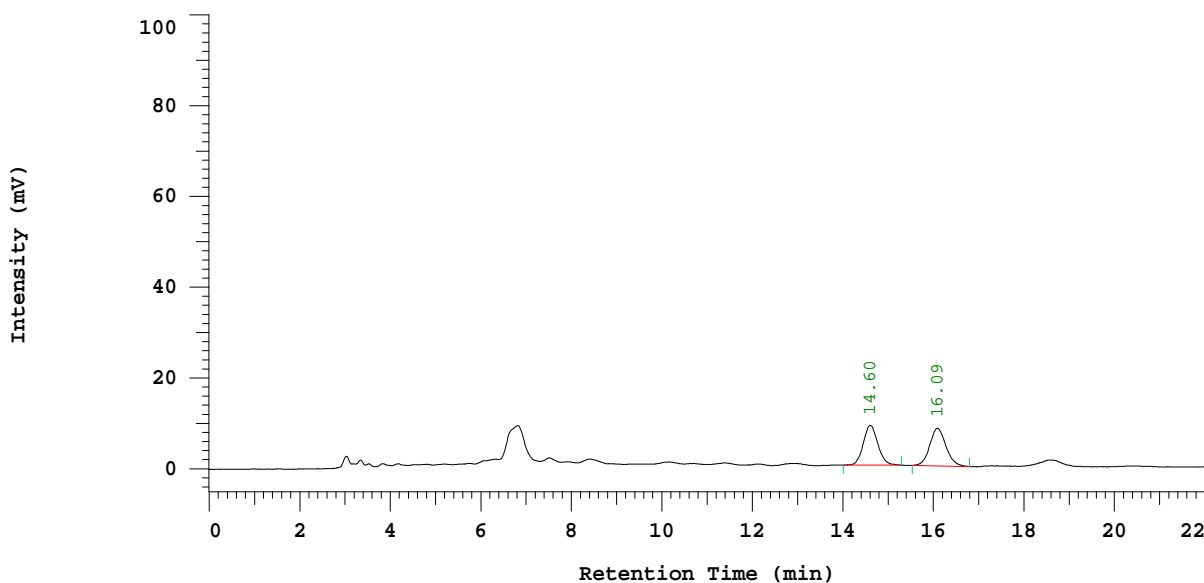

Processing Method: Test-IPA/Hx-2

Column Type: IA

Method Developer: NSD

Method Description:

Chrom Type: Fixed WL Chromatogram, 280 nm

Peak Quantitation: AREA

Calculation Method: EXT-STD

Scale Factor 1: 1.000

| No. | RT    | Area   | Height | Area %  |
|-----|-------|--------|--------|---------|
| 1   | 14.60 | 196429 | 8741   | 48.801  |
| 2   | 16.09 | 206085 | 8251   | 51.199  |
|     |       | 402514 | 16992  | 100.000 |

Peak rejection level: 5000

Fig S99. HPLC analysis of the racemic compound 4e, as a standard for comparison (Scheme 2)

### D-2000 Elite HPLC System Manager Report

Analyzed Date and Time: 2014/05/19 11:54 上午  
 Reported Date and Time: 2014/05/19 01:47 下午

Processed Date and Time: 2014/05/19 01:46 下午

Data Path: D:\NITIN\DATA\0125\

Processing Method: Test-IPA/Hx-2

System (acquisition): Sys 1 Series: 0125  
 Application(data): NITIN Vial Number: 1  
 Sample Name: NSD-09-184-F1 (Chiral) Vial Type: UNK  
 Injection from this vial: 1 of 1 Volume: 20.0 ul  
 Sample Description: 10%IPA+HX 1mL/Min Col-IA

Chrom Type: Fixed WL Chromatogram, 280 nm

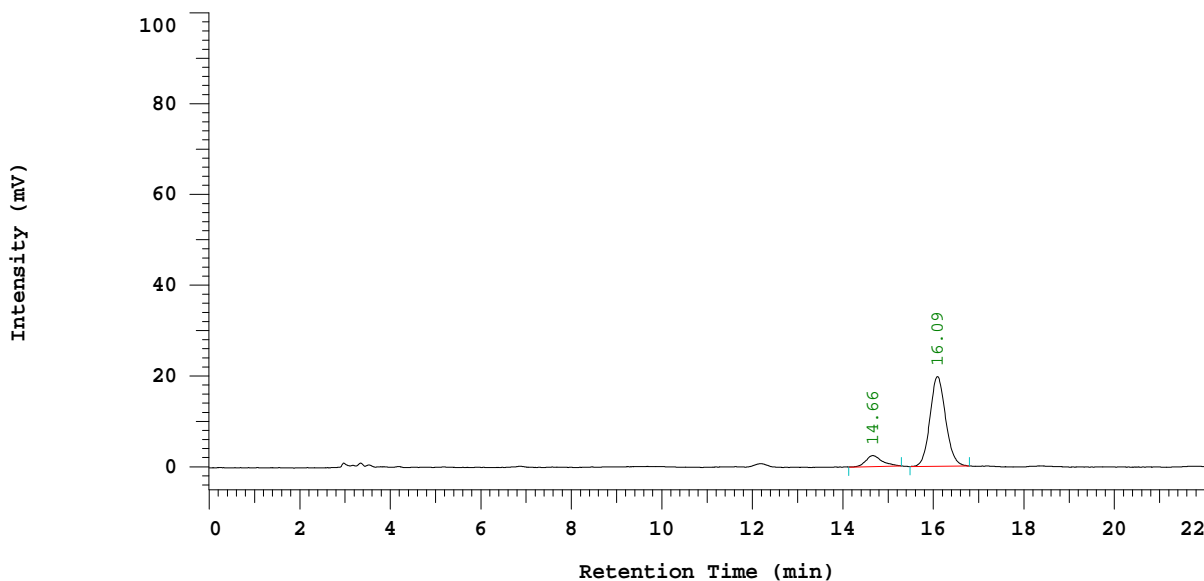

Processing Method: Test-IPA/Hx-2

Column Type: IA

Method Developer: NSD

Method Description:

Chrom Type: Fixed WL Chromatogram, 280 nm

Peak Quantitation: AREA

Calculation Method: EXT-STD

Scale Factor 1: 1.000

| No. | RT    | Area   | Height | Area %  |
|-----|-------|--------|--------|---------|
| 1   | 14.66 | 60741  | 2395   | 11.357  |
| 2   | 16.09 | 474106 | 19745  | 88.643  |
|     |       | 534847 | 22140  | 100.000 |

Peak rejection level: 5000

Fig S100. HPLC analysis of the compound 4e (Scheme 2, Method A)

### D-2000 Elite HPLC System Manager Report

Analyzed Date and Time: 2014/05/19 12:18 下午  
 Reported Date and Time: 2014/05/19 01:48 下午

Processed Date and Time: 2014/05/19 01:48 下午

Data Path: D:\NITIN\DATA\0126\

Processing Method: Test-IPA/Hx-2

System (acquisition): Sys 1 Series: 0126  
 Application(data): NITIN Vial Number: 1  
 Sample Name: NSD-09-184-F1 (CO) Vial Type: UNK  
 Injection from this vial: 1 of 1 Volume: 20.0 ul  
 Sample Description: 10%IPA+HX 1mL/Min Col-IA

Chrom Type: Fixed WL Chromatogram, 280 nm

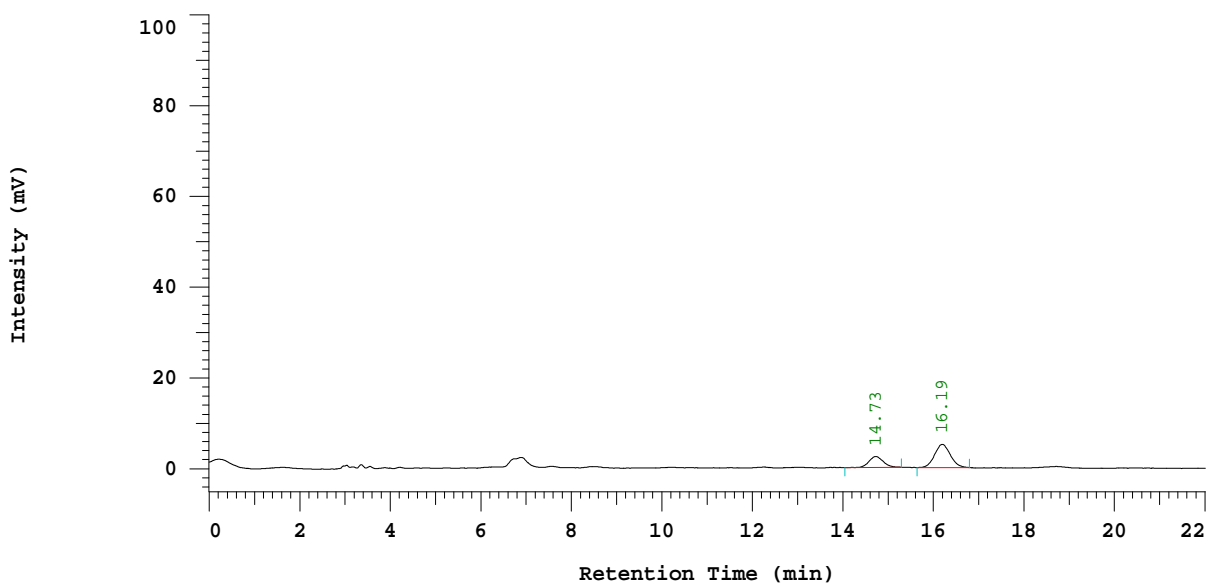

Processing Method: Test-IPA/Hx-2

Column Type: IA

Method Developer: NSD

Method Description:

Chrom Type: Fixed WL Chromatogram, 280 nm

Peak Quantitation: AREA

Calculation Method: EXT-STD

Scale Factor 1: 1.000

| No. | RT    | Area   | Height | Area %  |
|-----|-------|--------|--------|---------|
| 1   | 14.73 | 52989  | 2388   | 30.104  |
| 2   | 16.19 | 123033 | 5105   | 69.896  |
|     |       | 176022 | 7493   | 100.000 |

Peak rejection level: 5000

Fig S101. HPLC analysis of the mixture of chiral compound 4e and the racemic 4e, for comparison (Scheme 2, Method A)

### D-2000 Elite HPLC System Manager Report

Analyzed Date and Time: 2014/05/19 01:06 下午  
 Reported Date and Time: 2014/05/19 02:13 下午

Processed Date and Time: 2014/05/19 02:12 下午

Data Path: D:\NITIN\DATA\0127\

Processing Method: Test-IPA/Hx-2

System (acquisition): Sys 1 Series: 0127  
 Application(data): NITIN Vial Number: 1  
 Sample Name: NSD-10-03-F1 (Chiral-C-A- Vial Type: UNK  
 1:1) Volume: 20.0 ul

Injection from this vial: 1 of 1  
 Sample Description: 10%IPA+HX 1mL/Min Col-IA

Chrom Type: Fixed WL Chromatogram, 280 nm

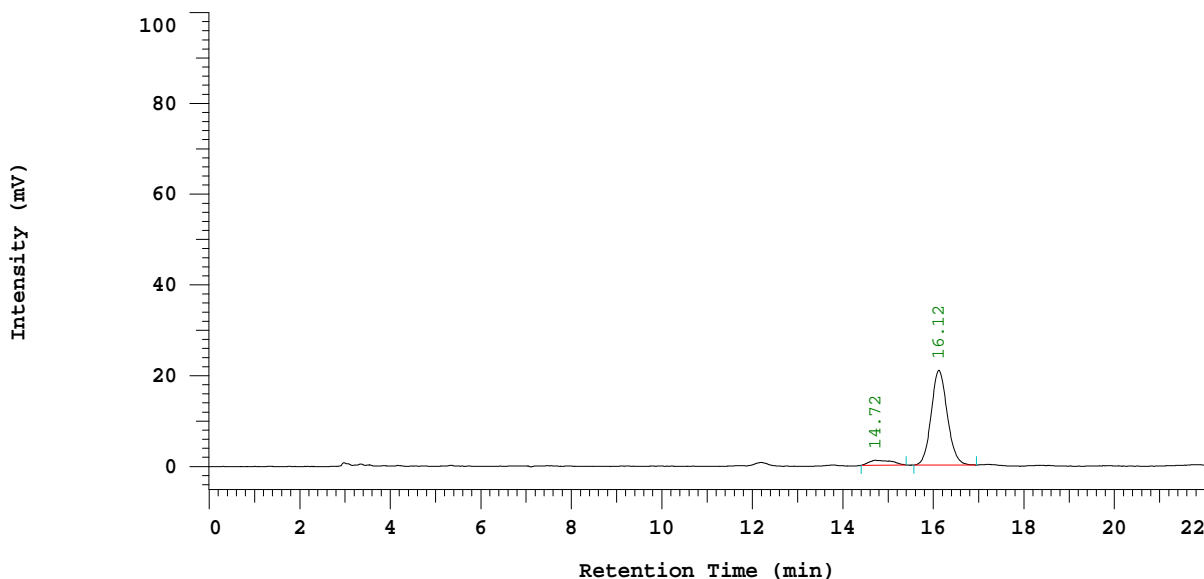

Processing Method: Test-IPA/Hx-2 Method Developer: NSD  
 Column Type: IA  
 Method Description:

Chrom Type: Fixed WL Chromatogram, 280 nm

Peak Quantitation: AREA  
 Calculation Method: EXT-STD  
 Scale Factor 1: 1.000

| No. | RT    | Area   | Height | Area %  |
|-----|-------|--------|--------|---------|
| 1   | 14.72 | 38566  | 1089   | 6.964   |
| 2   | 16.12 | 515258 | 20859  | 93.036  |
|     |       | 553824 | 21948  | 100.000 |

Peak rejection level: 5000

Fig S102. HPLC analysis of the compound 4e (Scheme 2, Method B)

### D-2000 Elite HPLC System Manager Report

Analyzed Date and Time: 2014/05/30 02:54 下午  
 Reported Date and Time: 2014/05/30 03:38 下午

Processed Date and Time: 2014/05/30 03:38 下午

Data Path: D:\NITIN\DATA\0130\

Processing Method: test-IPA/Hx-2 (Final Compound)

System (acquisition): Sys 1 Series: 0130  
 Application(data): NITIN Vial Number: 1  
 Sample Name: NSD-09-147 (Final-CSA) Vial Type: UNK  
 Injection from this vial: 1 of 1 Volume: 20.0 ul  
 Sample Description: 10%IPA+HX 1mL/MIN COL-IA

Chrom Type: Fixed WL Chromatogram, 280 nm

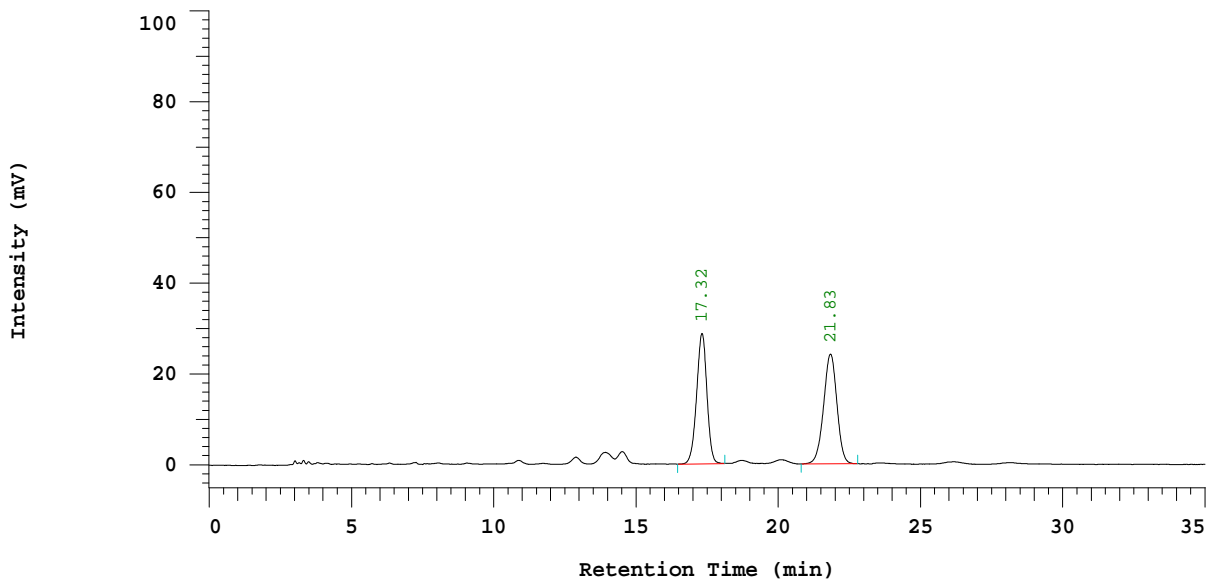

Processing Method: test-IPA/Hx-2 (Final Compound)  
 Column Type: IA Method Developer: NITIN

Method Description:

Chrom Type: Fixed WL Chromatogram, 280 nm

Peak Quantitation: AREA  
 Calculation Method: EXT-STD  
 Scale Factor 1: 1.000

| No. | RT    | Area    | Height | Area %  |
|-----|-------|---------|--------|---------|
| 1   | 17.32 | 723156  | 28683  | 48.205  |
| 2   | 21.83 | 777024  | 24155  | 51.795  |
|     |       | 1500180 | 52838  | 100.000 |

Peak rejection level: 200000

Fig S103. HPLC analysis of the compound 1a (Table 2, entry 1).

### D-2000 Elite HPLC System Manager Report

Analyzed Date and Time: 2013/12/17 02:09 下午  
 Reported Date and Time: 2013/12/17 02:57 下午

Processed Date and Time: 2013/12/17 02:56 下午

Data Path: D:\NITIN\DATA\0050\

Processing Method: Test-IPA/Hx-1

System (acquisition): Sys 1 Series: 0050  
 Application(data): NITIN Vial Number: 1  
 Sample Name: NSD-09-147 (Recovered MP) Vial Type: UNK  
 Injection from this vial: 1 of 1 Volume: 20.0 ul  
 Sample Description: 5%IPA+HX 1mL/MIN COL-IC

Chrom Type: Fixed WL Chromatogram, 275 nm

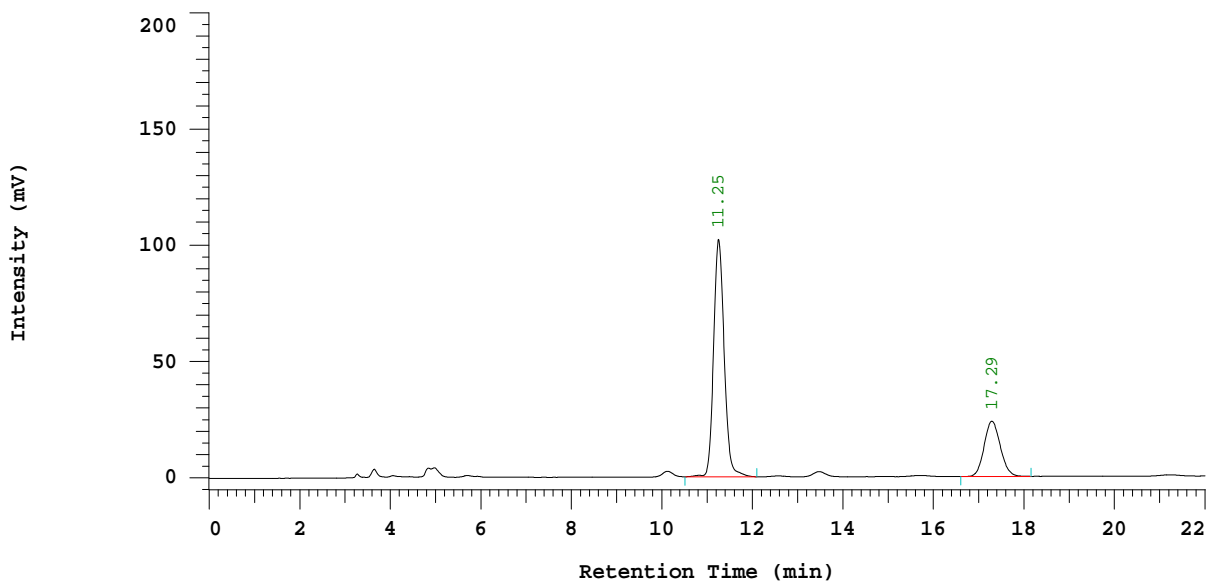

Processing Method: Test-IPA/Hx-1

Column Type: IC

Method Developer: NSD

Method Description:

Chrom Type: Fixed WL Chromatogram, 275 nm

Peak Quantitation: AREA

Calculation Method: EXT-STD

Scale Factor 1: 1.000

| No. | RT    | Area    | Height | Area %  |
|-----|-------|---------|--------|---------|
| 1   | 11.25 | 1654655 | 102039 | 73.627  |
| 2   | 17.29 | 592693  | 23754  | 26.373  |
|     |       | 2247348 | 125793 | 100.000 |

Peak rejection level: 200000

Fig S104. HPLC analysis of the recovered compound 4a, (Table 2, entry 1)



### D-2000 Elite HPLC System Manager Report

Analyzed Date and Time: 2014/01/28 11:59 上午  
 Reported Date and Time: 2014/06/20 11:05 上午

Processed Date and Time: 2014/06/20 11:04 上午

Data Path: D:\NITIN\DATA\0070\

Processing Method: Test-IPA/Hx-1

System (acquisition): Sys 1 Series: 0070  
 Application(data): NITIN Vial Number: 1  
 Sample Name: NSD-09-168 (MichaelP-CSA-6day) Vial Type: UNK  
 Volume: 20.0 ul

Injection from this vial: 1 of 1  
 Sample Description: 5%IPA+HX 1mL/MIN COL-IC

Chrom Type: Fixed WL Chromatogram, 275 nm

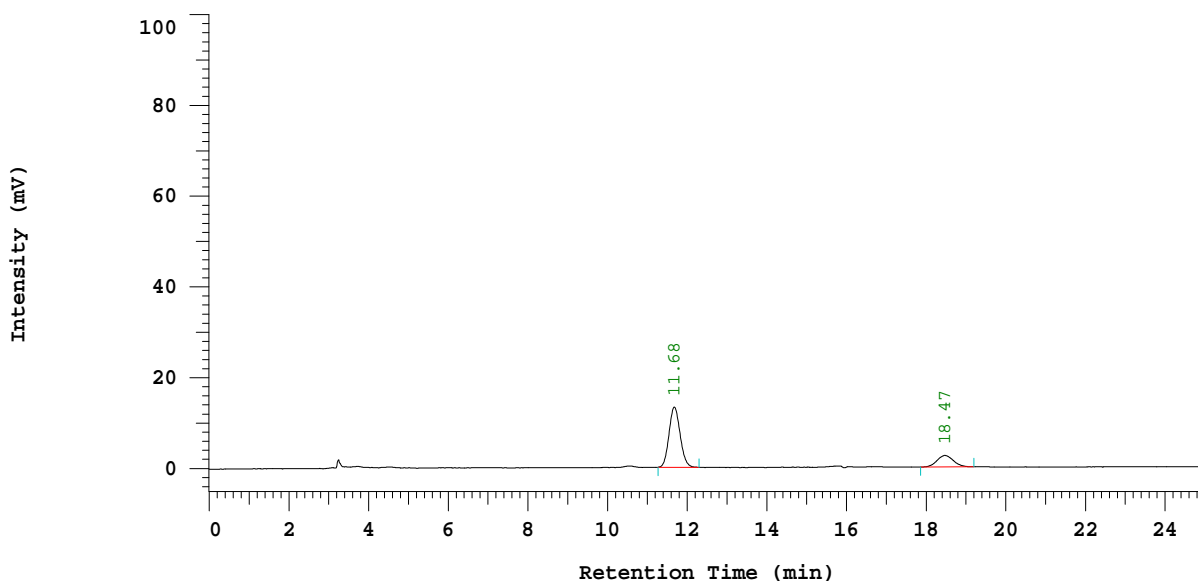

Processing Method: Test-IPA/Hx-1  
 Column Type: IC Method Developer: NSD  
 Method Description:

Chrom Type: Fixed WL Chromatogram, 275 nm

Peak Quantitation: AREA  
 Calculation Method: EXT-STD  
 Scale Factor 1: 1.000

| No. | RT    | Area   | Height | Area %  |
|-----|-------|--------|--------|---------|
| 1   | 11.68 | 255937 | 13244  | 78.132  |
| 2   | 18.47 | 71631  | 2505   | 21.868  |
|     |       | 327568 | 15749  | 100.000 |

Peak rejection level: 5000

Fig S105. HPLC analysis of the recovered compound 4a, (Table 2, entry 2)

### D-2000 Elite HPLC System Manager Report

Analyzed Date and Time: 2014/05/30 02:14 下午  
 Reported Date and Time: 2014/05/30 03:40 下午

Processed Date and Time: 2014/05/30 03:39 下午

Data Path: D:\NITIN\DATA\0129\

Processing Method: test-IPA/Hx-2 (Final Compound)

System (acquisition): Sys 1 Series: 0129  
 Application(data): NITIN Vial Number: 1  
 Sample Name: NSD-10-15 Vial Type: UNK  
 Injection from this vial: 1 of 1 Volume: 20.0 ul  
 Sample Description: 10%IPA+HX 1mL/MIN COL-IA

Chrom Type: Fixed WL Chromatogram, 280 nm

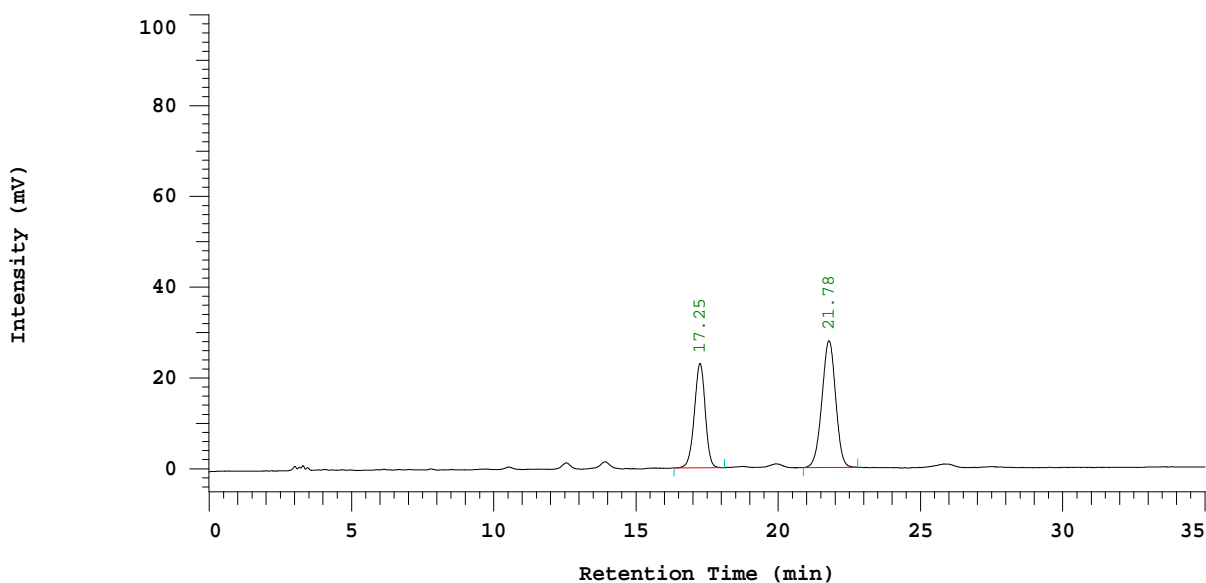

Processing Method: test-IPA/Hx-2 (Final Compound)  
 Column Type: IA Method Developer: NITIN  
 Method Description:

Chrom Type: Fixed WL Chromatogram, 280 nm

Peak Quantitation: AREA  
 Calculation Method: EXT-STD  
 Scale Factor 1: 1.000

| No. | RT    | Area    | Height | Area %  |
|-----|-------|---------|--------|---------|
| 1   | 17.25 | 607459  | 22992  | 39.575  |
| 2   | 21.78 | 927482  | 27934  | 60.425  |
|     |       | 1534941 | 50926  | 100.000 |

Peak rejection level: 200000

Fig S106. HPLC analysis of compound 1a, (Table 2, entry 3)

### D-2000 Elite HPLC System Manager Report

Analyzed Date and Time: 2014/05/30 12:34 下午  
 Reported Date and Time: 2014/05/30 12:29 下午

Processed Date and Time: 2014/05/30 12:28 下午

Data Path: D:\NITIN\DATA\0128\

Processing Method: test-IPA/Hx-2 (Final Compound)

System (acquisition): Sys 1 Series: 0128  
 Application(data): NITIN Vial Number: 1  
 Sample Name: NSD-10-21 Vial Type: UNK  
 Injection from this vial: 1 of 1 Volume: 20.0 ul  
 Sample Description: 10%IPA+HX 1mL/MIN COL-IA

Chrom Type: Fixed WL Chromatogram, 280 nm

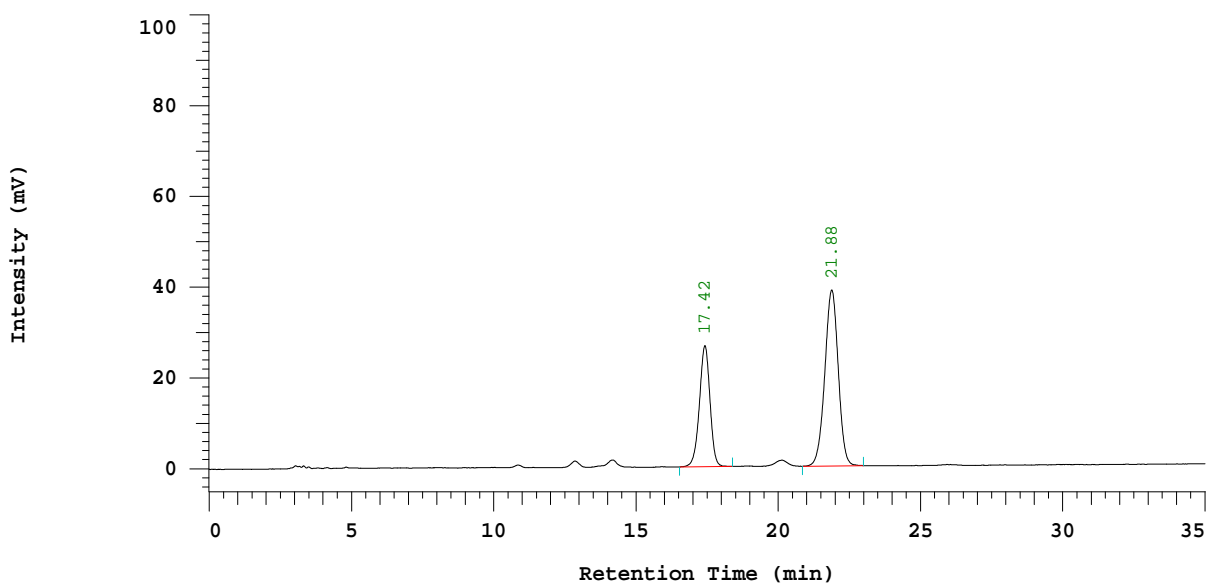

Processing Method: test-IPA/Hx-2 (Final Compound)  
 Column Type: IA Method Developer: NITIN  
 Method Description:

Chrom Type: Fixed WL Chromatogram, 280 nm

Peak Quantitation: AREA  
 Calculation Method: EXT-STD  
 Scale Factor 1: 1.000

| No. | RT    | Area    | Height | Area %  |
|-----|-------|---------|--------|---------|
| 1   | 17.42 | 688054  | 26698  | 35.306  |
| 2   | 21.88 | 1260762 | 38718  | 64.694  |
|     |       | 1948816 | 65416  | 100.000 |

Peak rejection level: 200000

Fig S107. HPLC analysis of compound 1a, (Table 2, entry 4)

### D-2000 Elite HPLC System Manager Report

Analyzed Date and Time: 2013/11/14 10:18 上午  
 Reported Date and Time: 2013/11/14 11:47 上午

Processed Date and Time: 2013/11/14 11:45 上午

Data Path: D:\NITIN\DATA\0036\

Processing Method: test-IPA/Hx-2 (Final Compound)

System (acquisition): Sys 1 Series: 0036  
 Application(data): NITIN Vial Number: 1  
 Sample Name: NSD-09-124 (AKA-DCM) Vial Type: UNK  
 Injection from this vial: 1 of 1 Volume: 20.0 ul  
 Sample Description: 10%IPA+HX 1mL/MIN COL-IA

Chrom Type: Fixed WL Chromatogram, 280 nm

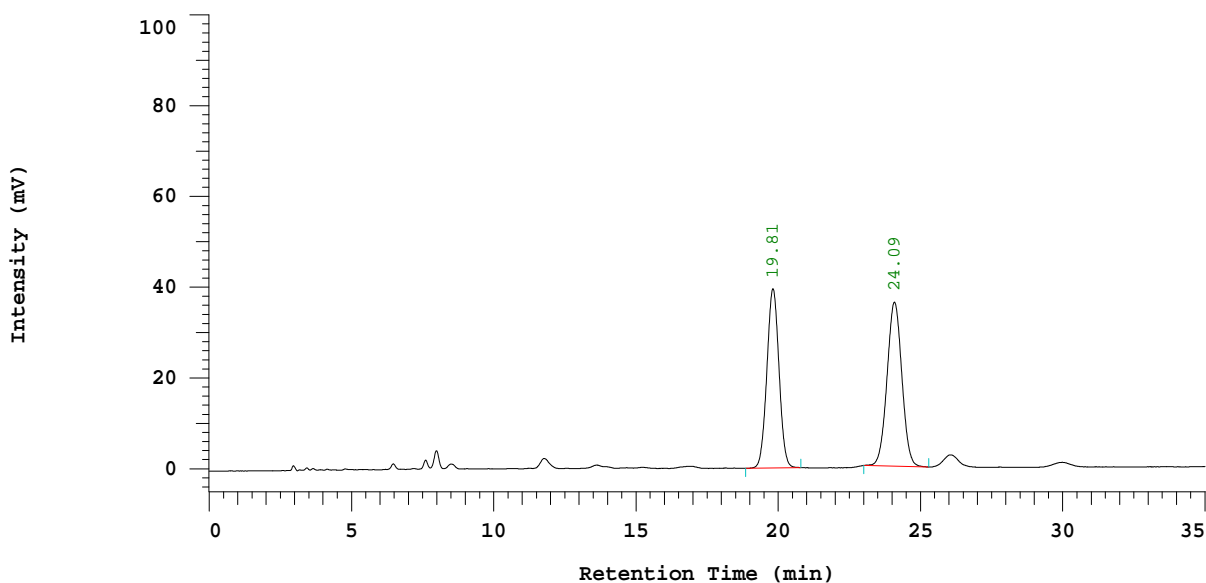

Processing Method: test-IPA/Hx-2 (Final Compound)  
 Column Type: IA Method Developer: NITIN  
 Method Description:

Chrom Type: Fixed WL Chromatogram, 280 nm

Peak Quantitation: AREA  
 Calculation Method: EXT-STD  
 Scale Factor 1: 1.000

| No. | RT    | Area    | Height | Area %  |
|-----|-------|---------|--------|---------|
| 1   | 19.81 | 1155936 | 39478  | 47.185  |
| 2   | 24.09 | 1293857 | 36107  | 52.815  |
|     |       | 2449793 | 75585  | 100.000 |

Peak rejection level: 200000

Fig S108. HPLC analysis of compound 1a, (Table 3, entry 1)

### D-2000 Elite HPLC System Manager Report

Analyzed Date and Time: 2013/11/14 11:06 上午  
 Reported Date and Time: 2013/11/14 11:50 上午

Processed Date and Time: 2013/11/14 11:49 上午

Data Path: D:\NITIN\DATA\0037\

Processing Method: test-IPA/Hx-2 (Final Compound)

System (acquisition): Sys 1 Series: 0037  
 Application(data): NITIN Vial Number: 1  
 Sample Name: NSD-09-125 (AKA-toluene) Vial Type: UNK  
 Injection from this vial: 1 of 1 Volume: 20.0 ul  
 Sample Description: 10%IPA+HX 1mL/MIN COL-IA

Chrom Type: Fixed WL Chromatogram, 280 nm

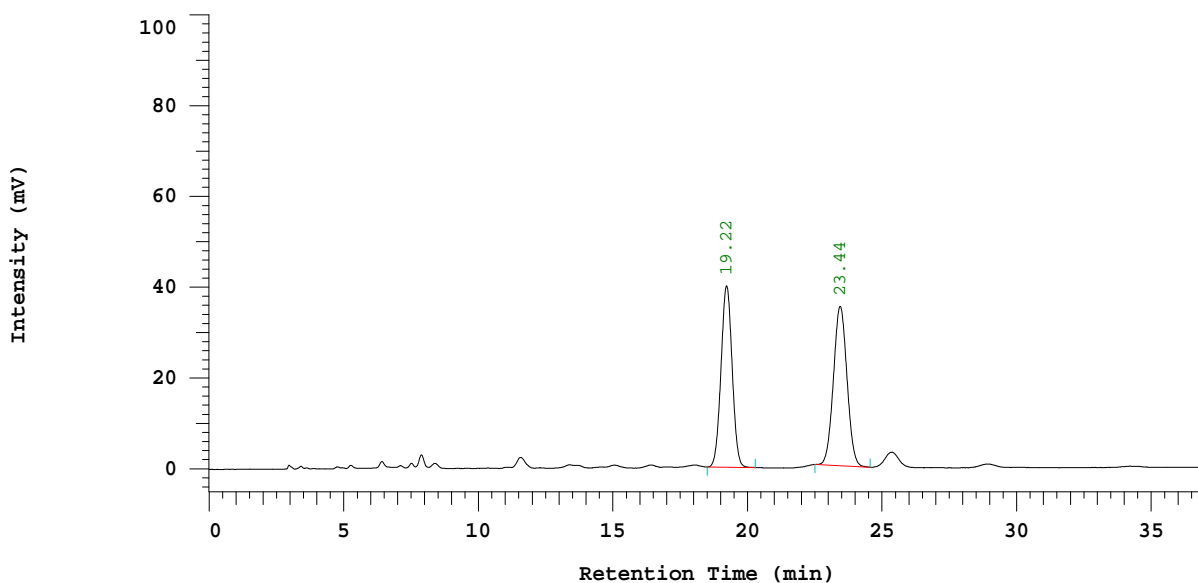

Processing Method: test-IPA/Hx-2 (Final Compound)  
 Column Type: IA Method Developer: NITIN  
 Method Description:

Chrom Type: Fixed WL Chromatogram, 280 nm

Peak Quantitation: AREA  
 Calculation Method: EXT-STD  
 Scale Factor 1: 1.000

| No. | RT    | Area    | Height | Area %  |
|-----|-------|---------|--------|---------|
| 1   | 19.22 | 1133611 | 39948  | 48.246  |
| 2   | 23.44 | 1216012 | 35076  | 51.754  |
|     |       | 2349623 | 75024  | 100.000 |

Peak rejection level: 200000

Fig S109. HPLC analysis of compound 1a, (Table 3, entry 2)
